# Supplementary material for: High temperature increased lignin contents of poplar (Populus spp) stem via inducing the synthesis caffeate and coniferaldehyde
Source: Front Genet. 2022 Sep 9;13:1007513. doi: 10.3389/fgene.2022.1007513 (PMC9500204; doi:10.3389/fgene.2022.1007513)
Supplement: Supplementary file 1 [file Table2.XLSX]

## Sheet: Sheet1
Compounds	CK1	CK2	CK3	HT1-6h	HT2-6h	HT3-6h	HT1-12h	HT2-12h	HT3-12h	HT1-24h	HT2-24h	HT3-24h	HT1-48h	HT2-48h	HT3-48h	HT1-72h	HT2-72h	HT3-72h	CK-Average	HT6h-Average	HT12h-Average	HT24h-Average	HT48h-Average	HT72h-Average	CK-SD	HT6h-SD	HT12h-SD	HT24h-SD	HT48h-SD	HT72h-SD
Sinapinaldehyde	1310000	1270000	1140000	975000	977000	889000	895000	905000	855000	1120000	1060000	1170000	755000	856000	854000	905000	833000	921000	1240000	947000	885000	1.11667e+06	821667	886333	66666.7	38666.7	20000	37777.8	44444.4	35555.6
p-Coumaraldehyde	3720000	3790000	3690000	3580000	3570000	3650000	3810000	3660000	3590000	3880000	3940000	3870000	3680000	3390000	3410000	4670000	4510000	4480000	3.73333e+06	3600000	3.68667e+06	3.89667e+06	3.49333e+06	4.55333e+06	37777.8	33333.3	82222.2	28888.9	124444	77777.8
L-Phenylalanine	3790000	4030000	3410000	3580000	3560000	3390000	3290000	3350000	3540000	3440000	3310000	3190000	3980000	3760000	4060000	3880000	4100000	4080000	3.74333e+06	3510000	3.39333e+06	3.31333e+06	3.93333e+06	4020000	222222	80000	97777.8	84444.4	115556	93333.3
Caffeate	755000	770000	823000	2620000	2810000	2770000	2450000	2570000	2620000	2880000	2930000	2800000	4040000	3790000	3740000	3410000	3690000	3540000	782667	2.73333e+06	2.54667e+06	2870000	3.85667e+06	3.54667e+06	26888.9	75555.6	64444.4	46666.7	122222	95555.6
Ferulic acid	89800	87400	84300	135000	132000	159000	112000	112000	113000	102000	128000	122000	159000	152000	140000	134000	133000	124000	87166.7	142000	112333	117333	150333	130333	1911.11	11333.3	444.444	10222.2	6888.89	4222.22
coniferaldehyde	447000	443000	391000	1460000	1460000	1250000	1090000	1110000	1000000	1270000	1200000	1220000	957000	1050000	983000	1250000	1220000	1300000	427000	1390000	1.06667e+06	1230000	996667	1.25667e+06	24000	93333.3	44444.4	26666.7	35555.6	28888.9
Cinnamic acid	4990000	4800000	4710000	4650000	4740000	5250000	4940000	4840000	5010000	5280000	5620000	5600000	5950000	5480000	5430000	5030000	5140000	4800000	4.83333e+06	4880000	4930000	5500000	5620000	4990000	104444	246667	60000	146667	220000	126667
