# Supplementary material for: High temperature increased lignin contents of poplar (Populus spp) stem via inducing the synthesis caffeate and coniferaldehyde
Source: Front Genet. 2022 Sep 9;13:1007513. doi: 10.3389/fgene.2022.1007513 (PMC9500204; doi:10.3389/fgene.2022.1007513)
Supplement: Supplementary file 2 [file Table3.XLSX]

Sample	Raw Reads	Clean Reads	Reads mapped	Unique mapped	Multi mapped	Read1 mapped	Read2 mapped	'+' mapped	'-' mapped	Clean Base(G)	Error Rate(%)	Q20(%)	Q30(%)	GC Content(%)
0h-1	47980164	47037580	33784170(71.82%)	32709979(69.54%)	1494691(2.28%)	16341002(34.74%)	16368977(34.80%)	16310255(34.67%)	16399724(34.87%)	7.06	0.03	97.34	92.21	43.65
0h-2	48890956	48318770	35011661(72.46%)	33901585(70.16%)	1522632(2.30%)	16982428(35.15%)	16919157(35.02%)	16915902(35.01%)	16985683(35.15%)	7.25	0.03	97.37	92.21	43.72
0h-3	66342852	65382796	48474225(74.14%)	46933848(71.78%)	2130438(2.36%)	23569877(36.05%)	23363971(35.73%)	23449122(35.86%)	23484726(35.92%)	9.81	0.02	98.25	94.49	43.81
HT1-6h	50590786	49786298	36008850(72.33%)	34763330(69.83%)	1712598(2.50%)	17406712(34.96%)	17356618(34.86%)	17312857(34.77%)	17450473(35.05%)	7.47	0.03	97.36	92.19	44.09
HT2-6h	42452770	41928494	31197600(74.41%)	30104953(71.80%)	1541878(2.61%)	15102769(36.02%)	15002184(35.78%)	15023331(35.83%)	15081622(35.97%)	6.29	0.02	98.62	95.56	44.22
HT3-6h	49825294	48705150	35255946(72.39%)	34040404(69.89%)	1643332(2.50%)	17060704(35.03%)	16979700(34.86%)	16958037(34.82%)	17082367(35.07%)	7.31	0.03	97.31	92.07	44.12
HT1-12h	52515658	51745986	37448405(72.37%)	36231144(70.02%)	1678232(2.35%)	18223700(35.22%)	18007444(34.80%)	18079960(34.94%)	18151184(35.08%)	7.76	0.03	98.05	93.97	44.05
HT2-12h	40572948	40019350	28846633(72.08%)	27909156(69.74%)	1292046(2.34%)	14056197(35.12%)	13852959(34.62%)	13924758(34.80%)	13984398(34.94%)	6	0.03	97.9	93.57	44.06
HT3-12h	59148454	58454554	41322351(70.69%)	39893951(68.25%)	2140654(2.44%)	20049225(34.30%)	19844726(33.95%)	19871335(33.99%)	20022616(34.25%)	8.77	0.03	97.17	91.77	43.93
HT1-24h	44270190	43674368	31514893(72.16%)	30453520(69.73%)	1539419(2.43%)	15321950(35.08%)	15131570(34.65%)	15208683(34.82%)	15244837(34.91%)	6.55	0.03	97.93	93.64	43.99
HT2-24h	40834860	40438266	29470312(72.88%)	28514117(70.51%)	1360285(2.36%)	14311769(35.39%)	14202348(35.12%)	14238774(35.21%)	14275343(35.30%)	6.07	0.02	98.53	95.32	43.91
HT3-24h	44038894	43484640	31691649(72.88%)	30645165(70.47%)	1516054(2.41%)	15385206(35.38%)	15259959(35.09%)	15301249(35.19%)	15343916(35.29%)	6.52	0.02	98.5	95.25	43.92
HT1-48h	49228058	48601732	35909362(73.88%)	34717859(71.43%)	1658343(2.45%)	17444919(35.89%)	17272940(35.54%)	17345162(35.69%)	17372697(35.75%)	7.29	0.03	98.01	93.83	44.01
HT2-48h	50824170	50169870	36393835(72.54%)	35199281(70.16%)	1655922(2.38%)	17640244(35.16%)	17559037(35.00%)	17558446(35.00%)	17640835(35.16%)	7.53	0.03	97.35	92.11	43.82
HT3-48h	53456178	52808392	37804754(71.59%)	36569635(69.25%)	1716372(2.34%)	18355798(34.76%)	18213837(34.49%)	18241826(34.54%)	18327809(34.71%)	7.92	0.03	97.2	91.87	43.75
HT1-72h	69699240	68904462	50091819(72.70%)	48447173(70.31%)	2252011(2.39%)	24284301(35.24%)	24162872(35.07%)	24168171(35.07%)	24279002(35.24%)	10.34	0.03	97.42	92.33	43.83
HT2-72h	47976846	47399224	35037327(73.92%)	33893710(71.51%)	1586467(2.41%)	17010246(35.89%)	16883464(35.62%)	16933715(35.73%)	16959995(35.78%)	7.11	0.02	98.15	94.18	43.92
HT3-72h	46207264	45598074	33582946(73.65%)	32494737(71.26%)	1504749(2.39%)	16328335(35.81%)	16166402(35.45%)	16231819(35.60%)	16262918(35.67%)	6.84	0.03	98.06	93.97	43.92
Total	904855582	892458006
