# Supplementary material for: High temperature increased lignin contents of poplar (Populus spp) stem via inducing the synthesis caffeate and coniferaldehyde
Source: Front Genet. 2022 Sep 9;13:1007513. doi: 10.3389/fgene.2022.1007513 (PMC9500204; doi:10.3389/fgene.2022.1007513)
Supplement: Supplementary file 3 [file Table9.XLSX]

## Sheet: Sheet1
Family	ID	0h-1	0h-2	0h-3	HT1-6h	HT2-6h	HT3-6h	HT1-12h	HT2-12h	HT3-12h	HT1-24h	HT2-24h	HT3-24h	HT1-48h	HT2-48h	HT3-48h	HT1-72h	HT2-72h	HT3-72h
4CL	Potri.001G036900	19.91	23.24	21.92	59.12	61.24	56.3	26.96	26.2	27.93	31.7	32.18	29.3	28.96	22.15	27.33	25.98	28.22	24.79
	Potri.001G105900	16.29	18.29	17.48	24.56	26.26	22.88	18.35	18.15	18.24	17.17	15.49	16.34	24.57	22.33	23.05	36.53	38.28	37.29
	Potri.003G099700	4.41	4.39	4.03	2.14	2.27	2.17	2.87	1.94	2.77	2.5	2.49	2.87	5.99	5.49	4.86	3.76	3.86	4.45
	Potri.003G188500	11.15	11.45	9.66	9.72	10.5	10.32	18.19	18.55	18.09	21.32	21.05	19.24	15.51	11.86	12.37	12.51	13.28	13.25
	Potri.004G102000	52.41	50.71	50	13.66	12.9	12.25	13.09	11.86	13.79	16.08	16.52	17.38	19.6	20.25	22.19	33.46	31.97	32.37
	Potri.006G169600	1.73	1.93	1.47	1.78	2.75	2.91	1.46	1.47	1.59	1.17	1.45	1.46	1.67	1.42	1.61	0.87	0.91	0.95
	Potri.006G169700	2.72	2.13	2.98	4.41	4.94	4	2.47	2.23	2.18	2.78	2.41	2.92	3.23	2.71	2.96	2.05	2.59	1.59
	Potri.010G230200	0.2	0.26	0.24	0.21	0.04	0.06	0.11	0.04	0.04	0.12	0.15	0.06	0.02	0	0.11	0.11	0.07	0.11
	Potri.012G094800	6.82	6.16	6.87	13.42	15.07	14.11	6.22	5.16	4.85	5.37	4.73	5.34	8.59	7.89	7.7	7.3	7.78	7.42
	Potri.015G092300	2.34	2.41	2	3.1	3.28	3.33	3.08	3.64	3.73	2.61	2.89	2.23	2.87	2.71	1.9	1.67	2.4	1.94
	Potri.015G144700	6.18	6.36	6.81	10.06	9.02	8.09	3.1	1.91	3.16	4.04	3.98	3.41	5.56	5.47	5.2	6.85	5.14	6.38
	Potri.017G033600	7.86	7.9	8.38	4.27	5.06	5.4	9.07	9.68	8.28	8.4	7.33	9.66	7.1	7.34	8.71	8.6	8.57	9.6
	Potri.017G112800	2.81	2.63	2.92	0.59	0.65	0.72	0.97	0.83	0.63	0.75	0.73	0.86	0.76	1.44	1.08	2.04	1.63	1.44
	Potri.018G094200	11.33	13.25	9.46	18.15	18.59	17.58	8.06	7.09	7.98	7.65	7.76	8.24	15.46	15.35	15.17	9.17	9.05	10.91
	Potri.019G049500	5.33	5.96	6.54	11.12	11.95	10.62	2.42	3.06	3.08	2.46	2.93	2.9	4.63	5.4	5.81	4.16	3.53	4.15
	Potri.T071600	2.7	2.98	1.51	8.47	6.17	6.59	1.49	3.84	2.24	0.5	1.06	1.28	3	2.18	2.37	2.78	2.34	1.78
C3'H	Potri.006G033300	61.04	55.58	59.35	110.93	114.87	106.19	108.21	107.99	109.28	107.5	107.16	94.56	79.93	64.81	70.03	63.84	72.45	62.22
	Potri.016G031100	1	0.85	0.81	3.85	3.54	3.16	0.83	0.81	0.87	0.53	0.22	0.27	0.67	0.8	0.9	0.64	0.59	0.8
C4H	Potri.018G146100	0.42	0.42	0.48	0.72	0.53	0.8	0.72	0.84	0.37	0.17	0.44	0.43	0.62	0.47	0.54	1.69	1.21	0.89
CAD	Potri.001G268600	9.67	10.87	9.3	4.07	4.54	4.45	7.02	6.54	6.07	6.27	4.83	5.21	14.31	16.28	12.77	18.66	21.36	20.17
	Potri.001G372400	0.12	0.11	0	0	0	0	0.05	0	0.02	0.19	0.61	0.16	0.17	0.08	0.16	0.06	0.09	0.36
	Potri.001G459200	0.26	0.2	0.59	0.11	0.14	0	0.34	0.94	0.79	0.46	0.35	0.57	0.26	0.14	0.49	0.36	0.64	0.29
	Potri.001G459500	0.97	0.53	1.09	0.48	0.2	0.49	1	1.22	1.14	1.37	1.23	1.41	1.07	1.07	0.97	0.98	0.93	0.86
	Potri.001G461700	0	0.14	0	0	0.09	0	0	0	0	0	0	0	0	0	0	0	0	0
	Potri.001G461900	0	0.05	0.05	0.03	0.11	0	0	0.02	0	0	0	0	0	0	0	0	0	0
	Potri.001G462000	0	0.04	0	0.02	0.01	0	0	0.02	0	0	0.02	0	0	0	0	0	0	0
	Potri.001G462200	0	0.04	0	0.08	0.01	0.04	0	0	0	0	0	0	0	0	0	0	0	0
	Potri.001G462800	5.16	4.59	4.88	17.62	20.54	17.99	11.09	11.74	11.39	10.54	9.93	9.72	8.48	9.4	9.9	8.02	8.51	7
	Potri.001G463100	5.94	5.3	6.14	3.49	3.42	3.03	4.33	4.35	5.02	5.82	6.2	5.3	3.6	4.28	4.79	5.66	4.26	5.56
	Potri.001G463300	0.11	0.2	0.26	0.18	0.04	0	0.03	0.04	0.14	0.28	0.2	0.45	0.14	0.18	0.23	0.16	0.23	0.37
	Potri.001G463400	0	0	0	0.29	0.61	0.79	0.07	0.05	0.13	0.02	0	0	0.04	0	0.04	0.03	0.04	0
	Potri.001G464700	0.12	0.19	0.06	0.03	0.04	0.04	0	0	0.08	0.04	0.14	0.13	0.06	0	0.04	0.19	0.25	0.3
	Potri.001G464800	0	0.05	0	0.05	0.06	0.11	0.36	0.25	0.13	0.23	0.42	0.21	0.18	0.18	0.06	0.02	0.02	0.19
	Potri.001G470100	1.22	0.97	1.14	2.61	2.21	2.58	1.86	1.32	1.67	1.13	0.86	1.03	1.44	1.3	1.46	1.43	1.3	1.06
	Potri.002G018300	52.8	48.63	49.78	157.33	153.82	157.83	64.97	66.51	64.73	39.6	40.6	42.41	83.4	83.95	79.13	34.22	34.17	34.84
	Potri.006G024300	0.06	0.02	0.05	0.25	0.12	0.33	0.13	0.17	0.04	0.08	0.07	0.02	0.01	0.1	0.03	0.23	0.14	0.21
	Potri.006G024400	0	0	0	0	0.03	0	0.04	0.16	0.29	0	0.21	0	0	0	0	0.82	0.43	1.09
	Potri.006G128900	19.32	19.08	19.48	19.28	18.88	16.16	26	24.79	25.56	14.82	17.14	14.4	19.07	17.8	18.61	25.11	25.89	24.03
	Potri.006G199100	14.32	14.33	14.63	31.36	32.28	31.91	5.41	5.6	4.56	5.56	5.2	4.59	12.94	13.65	13.84	13.15	13.38	13.81
	Potri.009G062800	1.85	2.95	3.31	1.46	1.64	1	1.93	2.05	1.93	0.99	0.83	0.6	0.82	1.13	0.6	6.45	6.46	6.61
	Potri.009G062900	2.01	2.54	0.86	4.72	0.66	1.31	3.62	3.17	3.74	5.32	4.62	3.47	2.9	2.58	2.69	3.49	3.05	1.48
	Potri.009G063100	1.4	1.58	1.53	0.97	1.17	0.55	1.08	0.97	0.82	0.33	0.58	0.49	0.64	0.93	0.64	4.64	3.03	4.44
	Potri.009G063300	0.09	0.16	0.02	0.11	0.06	0.27	0.17	0	0.08	0.07	0.05	0.2	0.11	0.04	0.04	0.48	0.35	0.44
	Potri.009G095800	194.34	196.07	191.08	178.18	179.1	175.58	262.93	259.97	251.94	385.03	374.58	343.03	226.45	186.48	202.46	198.05	221.41	210.5
	Potri.011G148100	32.22	30.54	37.01	19.35	21.52	19.31	30.58	37.08	31.19	43.5	36.92	36.75	30.75	27.73	26.94	26.15	30.11	28.02
	Potri.011G148200	13.71	14.32	12.12	4.98	5.3	5.27	12.66	13.6	11.95	16.86	17.94	20.2	10.76	10.83	11.08	10.68	11.9	11.81
	Potri.011G157900	0.32	0.06	0.42	0.98	0.4	0.53	0.49	0.82	0.56	0.17	0.32	0.17	1.47	1.53	1.85	0.37	0.35	0.49
	Potri.011G158100	0.46	0.16	0.36	0.5	0.57	0.71	0.06	0.04	0.57	0.02	0.13	0.1	0.31	0.29	0.23	0.43	0.47	0.43
	Potri.011G158300	7.46	7.9	8.09	13.22	14.67	14.83	9.08	9.1	8.94	5.52	6.4	6.31	14.63	10.99	14.71	8.08	8.45	7.73
	Potri.011G158400	0.6	0.57	0.51	1.24	1.39	1.55	1.52	1.17	1.02	1.28	0.55	0.89	1.44	0.54	0.77	1.01	1.38	0.68
	Potri.011G161400	0	0.02	0.01	0.05	0.04	0.08	0.02	0	0.19	0.04	0.05	0.02	0.02	0.04	0.02	0	0.02	0
	Potri.011G161500	0	0	0.07	2.43	3.13	3.12	2.03	1.36	1.42	1.73	1.58	2.12	0.47	0.16	0.29	0.08	0.26	0.19
	Potri.011G161800	0.22	0.23	0.84	0.12	0.12	0.27	0.29	0.51	0.28	0.51	0.39	0.95	0.56	0.66	0.69	0.6	0.55	0.38
	Potri.011G162800	0.07	0.1	0.14	0.11	0.02	0.07	0.03	0.04	0.03	0	0.02	0.02	0	0	0.05	0.34	0.32	0.24
	Potri.011G162900	0.17	0	0.02	0.03	0.07	0	0	0	0.12	0	0	0.02	0	0.06	0.03	0.27	0.07	0.41
	Potri.011G163000	0	0.08	0	0	0	0	0	0	0	0	0	0	0	0	0	0.05	0.03	0
	Potri.012G034700	0.51	0.52	0.85	0.22	0.23	0.16	0.43	0.13	0.44	0.42	0.57	0.4	0.4	0.63	0.5	0.42	0.36	0.66
	Potri.015G025900	0	0.04	0	0.15	0.1	0.04	0.07	0.09	0.03	0.08	0.04	0	0.07	0.03	0	0	0.04	0
	Potri.016G065300	1.6	1.97	1.41	1.34	0.96	1.78	1.08	0.77	1.05	0.91	1.12	0.83	0.83	1.64	1.1	1.54	1.4	1.16
	Potri.016G078300	38.15	40.55	37.01	77.22	78.02	80.07	50.66	52.62	55.28	49.93	46.68	49.82	54.64	52.37	50.96	47.91	47.6	46.76
	Potri.019G063400	1.95	1.4	1.86	1.32	1.39	0.71	2.44	2.82	3.05	2.18	1.44	2.17	1.2	0.79	1.23	2.79	2.53	2.86
CCoAoMT	Potri.001G304800	60.89	60.43	60.18	142.6	148.51	141.63	90.34	91.84	87.24	94.55	93.29	90.05	77.51	58.32	68.72	79.9	85.7	84.74
	Potri.008G136600	11.07	12.08	9.71	16.18	16.48	17	14.74	11.97	13.94	12.07	11.29	13.07	6.88	8.87	9.46	7.41	7.6	10.05
	Potri.008G136700	0.87	0.79	0.24	0.11	0.32	0.46	0.44	0.17	0.24	0.42	0.72	0.31	0.64	0.45	0.52	0.95	1.26	0.53
	Potri.009G099800	36.15	35.83	35.17	153.1	153.92	151.06	85.9	85.25	85.93	78.74	75.19	73.9	65.27	46.37	54.07	50.39	59.04	52.58
CCR	Potri.001G045500	0.09	0	0.17	0.02	0	0.02	0	0.21	0.02	0.02	0.05	0.05	0.02	0.02	0.04	0.02	0.28	0.25
	Potri.001G093300	3.97	2.62	3.79	4.01	3.52	3.32	0.54	1.16	0.63	0.52	0.33	0.97	2.5	2.73	3.79	3.93	2.48	3.36
	Potri.001G140700	0.73	1.23	0.69	1.98	2.29	2.05	1.96	2.27	1.78	1.47	1.39	1.47	2.14	1.38	2.24	1.43	0.9	1.19
	Potri.001G256700	0.24	0.23	0.11	0.52	0.52	0.21	0.68	0.4	0.25	0.26	0.07	0.51	0.17	0.5	0.62	0.2	0.15	0.12
	Potri.001G349600	0.31	0.27	0.18	0.44	0.29	0.24	0.14	0.06	0.23	0.16	0.18	0.57	0.05	0	0	0.07	0.44	0.2
	Potri.001G415500	2.38	2.71	2.48	4.85	5.84	5.38	4.59	4.16	4.17	3.48	3.49	3.83	2.72	3.78	4.06	3.56	3.67	3.69
	Potri.002G003200	0.99	0.57	1.3	0.41	0.53	0.62	0.33	0.94	0.74	0.77	0.71	1.09	0.38	0.98	0.5	0.86	0.93	1.56
	Potri.002G004100	26.49	27.13	25.63	25.08	24.56	26.87	11.88	11.63	12.91	14.7	13.28	14.71	24.72	24.04	26.01	25.69	26.47	28.3
	Potri.002G004500	2.97	4.02	3.47	3.56	3.64	4.21	1.6	2.47	2.24	3.1	2.91	3.29	2.62	2.18	3.05	2.52	2.79	2.58
	Potri.002G033600	2.94	2.55	2.95	20.84	19.54	17.6	1.58	2.49	2.59	1.69	1.24	1.53	5.39	6.05	6.54	3.3	2.91	5
	Potri.002G147600	0.06	0.12	0.38	0.05	0.21	0.47	0.31	0.09	0.6	0.17	0.23	0.09	0.19	0.49	0.11	0.03	0.12	0.22
	Potri.002G147700	0.26	0.25	0.25	0.83	0.63	1.12	1.28	1.79	1.25	1.17	0.92	1.69	0.75	1.13	0.39	0.63	0.35	0.55
	Potri.002G148000	4.17	3.41	3.73	3.41	3.74	3.79	1.98	1.17	1.71	1.61	1.54	1.66	2.57	2.98	1.67	4.37	5.34	5.41
	Potri.003G093700	2.54	3.05	2.04	6.21	7.3	7.02	1.96	1.82	2.15	3	1.38	1.66	2.57	2.37	2.66	2.25	1.9	1.86
	Potri.003G181400	84.88	83.4	79.42	140.87	144.66	140.48	73.94	71.28	77.14	76.45	71.02	68.89	83.68	79.03	84.54	96.1	95.31	95.8
	Potri.004G030700	5.42	5.45	7.22	17.81	15.92	15.34	6.32	5.73	5.87	4.97	4.41	3.76	8.94	8.33	8.01	6.27	6.73	8.03
	Potri.004G230900	20.51	17.97	21.65	5.77	5.46	5.86	16.32	16.11	16.69	19.26	14.75	15.84	10.3	10.59	10.5	17	17.83	17.61
	Potri.005G229500	10.22	8.09	10.43	15.69	14.15	15.74	7.81	7.44	7.29	6.13	5.48	4.31	11.73	13.92	13.87	6.43	5.31	6.96
	Potri.005G257700	37.13	35.77	37.87	11.64	9.84	9.92	23.32	23.64	23.15	29.19	30.77	31.79	19.47	20.18	21.61	32.68	31.16	32.57
	Potri.006G087200	4.12	5.02	4.18	10.75	12.98	11.12	8.45	7.74	7.13	7.54	6.78	6.63	5.67	4.09	6.53	4.12	3.87	5.21
	Potri.006G178700	0.21	0.2	0.16	0.67	0.7	0.72	0.13	0.24	0.23	0.34	0.15	0.17	0.39	0.49	0.44	0.35	0.16	0.28
	Potri.008G120200	0.22	0.5	0.35	1.13	0.74	0.95	0.12	0.1	0.28	0.95	0.67	0.94	0.32	0.48	0.1	0.41	0.48	0.52
	Potri.009G052400	7.13	6.62	6.64	2.09	1.83	1.4	4.42	3.81	3.88	6.97	5.15	6.35	2.76	2.41	2.04	3.08	3.47	3.49
	Potri.010G125400	26.23	24.29	25.22	44.7	42.41	42.16	15.62	16.9	16.21	13.27	14.75	14.15	16.44	17.69	18.97	21.06	20.24	20.33
	Potri.011G031700	0.08	0.19	0.08	0	0	0	0	0.04	0.05	0.04	0.06	0.14	0.06	0.06	0.03	0.19	0.16	0.05
	Potri.017G110500	2.12	2.34	1.92	3.28	4.38	4.26	0.87	0.73	1.36	1.77	1.32	1.19	2.39	1.65	2.21	1.58	2.02	0.82
	Potri.018G100500	8.38	8.28	7.6	10.25	8.78	8.77	5.23	5.96	4.82	4.75	4.12	4.51	4.47	4.08	4.44	6.65	6.61	5.72
	Potri.T134100	0.48	0.57	0	0.04	0.07	0.39	0.29	0.12	0.22	0.06	0.37	0.11	0.3	0.4	0.48	0.22	0.21	0.16
	Potri.T168400	4.26	4.97	4.55	4.7	4.62	5.04	2.39	1.88	2.05	2.03	3.86	2.63	4.22	3.9	2.24	6.02	5.65	5.23
	Potri.T168500	15.47	13.19	13.93	7.58	8.19	6.6	17.99	17.94	17.48	11.79	11.66	11.62	11.38	11.61	8.64	14.41	15.46	13.84
	Potri.T168700	0.36	0.32	0.21	0.07	0.11	0.06	0.58	0.23	0.3	0.27	0.32	0.33	0.08	0.26	0.25	0.15	0.27	0.22
	Potri.T175100	4.38	5.73	4.51	2.15	3.19	3.17	5.55	5.08	5.2	5.55	4.95	5.04	3.8	2.37	2.88	3.85	5.51	4.96
COMT	Potri.006G120000	86.98	87.54	89.24	34.49	34.27	35.1	72.81	73.42	77.28	82.39	78.77	80.48	80.81	81.96	80.97	101.51	101.41	98.39
F5H	Potri.005G117500	15.45	17.42	19.3	43.14	46.33	42.47	53.21	52.49	55.94	49.58	51.43	45.81	37.36	25.33	31.27	25.08	26.72	26.23
	Potri.007G016400	26.97	29.64	30.41	63.49	69.02	64.1	66.36	63.31	64.53	76.64	73.02	75	45.31	32.22	40.46	38.05	41.21	36.38
	Potri.009G123600	0.21	0.05	0.07	0.04	0.02	0.09	0.3	0	0.1	0.04	0.04	0.11	0	0.15	0.1	0.29	0.1	0.21
HCT	Potri.001G128100	1.17	1.2	1.35	5.1	5.57	4.65	2.63	2.41	2.4	2.37	2.07	1.81	2.5	1.62	1.95	1.58	1.35	1.67
	Potri.001G310000	0.17	0.24	0.07	0.93	0.77	0.84	0.34	0.49	0.82	0.13	0.29	0.22	0.18	0.27	0.37	0.24	0.2	0.02
	Potri.003G183900	22.11	24.63	21.85	38.44	38.85	38.84	36.5	40.49	37.29	49.57	48.88	38.42	25.27	19.95	23.02	21.3	23.33	21.82
	Potri.004G017600	5.9	5.54	4.8	0.27	0.56	0.58	1.93	1.36	1.7	1.62	1.99	1.63	2.44	2.53	2.23	5.68	5.86	5.42
	Potri.005G028000	0.99	1.41	1.31	0.17	0.28	0.47	0.44	0.08	0.35	0.28	0.32	0.27	0.34	0.28	0.13	0.32	0.23	0.11
	Potri.005G028100	3.6	3.57	4.88	1.59	1.35	1.43	1.03	1.44	1.28	1.5	1.47	1.24	1.07	0.75	1.1	1.6	1.28	1.31
	Potri.005G028500	0.05	0.09	0.1	0.18	0.12	0	0.04	0.16	0.08	0	0	0.2	0.15	0	0.04	0	0.04	0
	Potri.005G052200	3.62	4.6	5.46	2.69	3.61	4.29	2.84	2.51	2.68	1.76	1.32	2.21	2.93	3.19	3.76	2.62	2.85	3.53
	Potri.006G034100	0.77	0.58	0.9	1.33	1.41	1.36	0.91	0.99	0.58	1	0.79	0.7	0.39	0.74	0.61	0.55	0.34	0.47
	Potri.006G036100	0.39	0.09	0.03	0.26	0.22	0.1	0.09	0.34	0.2	0.1	0.11	0	0.09	0.27	0	0.06	0.23	0.05
	Potri.006G165200	0	0	0	0.02	0.03	0	0	0.05	0.12	0	0	0	0	0	0.13	0.03	0	0.19
	Potri.007G003800	0.63	0.81	0.88	7.89	8.07	8.08	3.81	4.05	3.7	2.48	3.2	3.19	4.29	3.79	4.38	1.7	1.7	0.92
	Potri.008G033500	0.61	0.5	0.63	0.15	0.51	0.13	0.45	0.37	0.63	0.09	0.26	0.16	0.45	0.66	0.24	0.14	0.18	0.06
	Potri.008G034300	0.49	0.68	0.73	0.24	0.38	0.18	0.33	0.5	0.7	0.18	0.44	0.25	0.44	0.38	0.71	0.09	0.08	0.09
	Potri.008G180400	12.21	12.6	11.25	5.31	5.35	5.01	15.82	14.32	13.56	17.62	17.56	16.59	9.22	6.71	9.82	12.24	12.45	11.13
	Potri.010G053800	1.61	2.59	1.97	10.14	9.23	10.06	5.41	3.79	4.85	5.21	6.4	4.64	6.94	8.63	6.73	2.63	3.16	3.07
	Potri.010G053900	0.38	0.27	0.23	1.54	1.48	2.15	1.17	0.78	1.11	0.85	0.53	0.49	1.44	1.65	1.84	0.93	0.74	0.67
	Potri.010G054100	0.04	0.17	0.2	0.41	0.44	0.29	0.21	0.15	0.27	0.37	0.35	0.39	0.29	0.34	0.24	0.39	0.45	0.35
	Potri.010G056400	2.46	2.49	1.76	1.25	1.44	1.18	1.37	1.27	1.31	2	1.94	1.41	1.75	1.33	1.89	2.03	1.93	2.45
	Potri.011G124200	0.85	0.7	0.84	0.5	1.05	1.05	0.13	0.19	0.22	0.36	0.48	0.33	0.99	0.77	1.25	0.78	1.09	1.18
	Potri.013G039700	0.85	0.78	0.35	0.39	0.49	0.3	0.91	1.13	0.48	0.47	0.6	0.35	0.64	0.36	0.47	0.41	0.42	0.18
	Potri.015G127000	0.22	0.07	0.2	0.04	0.03	0.05	0.15	0.11	0.24	0.52	0.06	0.16	0.14	0.25	0.5	0.41	0.42	0.32
	Potri.017G024800	0.05	0.14	0	0.28	0.44	0.25	0.02	0.08	0.06	0.15	0.06	0.13	0.02	0	0.04	0.06	0.16	0.05
	Potri.017G029300	0.12	0.19	0.08	0.06	0.06	0.05	0.43	0.14	0.3	0.47	0.47	0.34	0.25	0.22	0.06	0.2	0.02	0.02
	Potri.018G104700	2.53	3.21	2.77	6.08	4.97	4.77	2.41	2.16	2.96	3.05	3.45	2.55	2.84	3.68	2.79	2.54	2.63	2.58
	Potri.018G104800	1.73	1.65	1.82	3.98	3.99	3.36	1.39	1.43	1.28	1.95	1.16	1.33	1.82	2.28	1.57	1.6	1.4	1.52
	Potri.018G105400	2.95	2.99	3.27	3.51	3.17	3.05	1.15	1.04	1.17	1.1	0.96	0.77	2.18	2.3	3.23	1.71	1.81	2.07
	Potri.018G105500	3.97	4.41	4.15	6.05	4.89	5.2	2	1.81	1.48	0.94	0.95	1.72	3.64	3.01	3.54	2.47	2.46	1.51
	Potri.018G109900	0.09	0.27	0.23	0.4	0.21	0.64	1.03	0.49	0.57	0.6	0.4	0.47	0.13	0.17	0.15	0.2	0.07	0.12
	Potri.019G001200	3.72	3.05	3.78	4.91	5.67	5.87	0.36	0.83	0.24	0.17	0.38	0.43	2.2	2.21	2.15	0.5	0.42	0.73
	Potri.019G001400	1.46	1.4	1.39	1.06	1.22	0.95	0.72	1.61	1.09	0.53	0.73	0.99	1.31	1.65	1.52	0.55	0.77	0.54
	Potri.T111900	1.54	1.24	1.19	7.03	6.37	7.18	4.27	3.94	3.07	4.76	4.19	3.87	5.14	4.92	5.41	2.48	1.5	1.71
	Potri.T112000	0.15	0.16	0.02	0.65	0.27	0.72	0.15	0.37	0.22	0.08	0.11	0.65	0.11	0.61	0.43	0.11	0.07	0.22
	Potri.T112100	7.43	7	6.77	2.86	3.73	2.93	1.73	2.33	2.1	3.63	4.25	3.35	5	4.74	3.71	5.75	5	4.36
	Potri.T124500	0.24	0.16	0.17	0.02	0	0.05	0.61	0.56	0.14	0.42	0.67	0.49	0.11	0.18	0.06	0.15	0.05	0.36
LAC	Potri.001G054600	1.71	1.57	1.54	1.66	1.85	1.69	1.35	1.96	1.81	2.44	2.98	2.43	1.43	1.91	2.15	1.52	1.34	1.16
	Potri.001G184300	0	0	0.01	0.33	0.05	0.16	0.07	0.14	0.13	0.14	0.15	0.09	0.06	0.03	0.01	0.01	0	0.01
	Potri.001G248700	0.44	0.27	0.17	1.74	1.83	1.57	0.91	0.72	1.1	1.17	1.13	0.92	0.7	0.41	0.76	0.52	0.68	0.15
	Potri.001G401100	0.35	0.19	0.15	0.64	0.76	0.9	0.49	0.55	0.36	0.86	0.61	0.27	0.34	0.37	0.65	0.29	0.39	0.31
	Potri.001G401300	2.41	2.27	3.02	11.53	10.97	10.94	4.72	6.49	4.86	6.6	6.02	5.08	5.5	4.87	4.83	3.8	3.92	3.39
	Potri.004G032200	5.65	3.31	3.94	17.39	18.57	16.64	5.11	4.04	4.01	4.2	3.86	3.13	5.62	4.84	5.24	6.38	6.56	5.89
	Potri.004G085000	108.65	102.81	105.73	19.47	19.5	18.94	98.48	96.18	96.27	110.22	103.3	108.57	82.77	81.33	78.76	87.28	87.17	84.78
	Potri.004G156400	0.76	1.33	0.64	1.01	1.24	0.62	1.02	1.18	1.11	0.92	1.02	0.57	0.94	0.99	0.75	1.64	0.83	1.34
	Potri.005G200500	0.09	0.27	0.32	0	0	0	0.06	0	0	0	0	0	0	0	0	0.65	0.79	0.68
	Potri.005G200600	0.12	0.07	0.22	0	0	0	0	0.02	0.03	0	0	0	0.01	0	0	0.13	0.21	0.09
	Potri.005G200700	0.02	0.05	0.15	0.35	0.62	0.36	0.43	0.42	0.41	0.24	0.2	0.62	0.64	1.04	0.53	0.32	0.21	0.45
	Potri.006G087100	2.7	3.31	2.58	26.43	28.9	26.59	10.13	10.1	10.5	14.12	13.27	10.85	9.53	5.92	7.34	5.87	7.63	6.99
	Potri.006G087500	0.78	0.46	0.37	5.68	7.15	6.93	2.44	1.49	2.5	0.62	1.59	2.43	0.7	0.79	0.74	0.67	0.68	0.62
	Potri.006G087600	2.44	2.33	2.98	4.17	2.89	3.65	2.38	1.49	2.12	3.25	2.66	2.66	2.62	3.88	2.85	2.5	2.55	2.09
	Potri.006G094100	0	0	0	0	0.03	0.05	0	0	0.01	0	0	0	0.02	0	0	0	0	0
	Potri.006G096900	0.34	0.37	0.29	3.27	3.98	3.09	1.12	1.6	1.5	0.77	1.75	1.33	1.39	1.03	1.44	1.1	0.9	0.58
	Potri.006G097000	0.17	0.11	0.17	0.96	1.81	1.59	0.69	0.86	1.05	0.71	0.34	0.75	0.68	0.76	0.5	0.57	0.45	0.8
	Potri.006G097100	0.66	0.3	0.3	3.89	4.06	3.38	2.14	2.5	1.98	1.88	1.63	1.44	1.36	1.55	1.53	0.85	1.11	0.86
	Potri.006G236800	9.91	9.72	9.42	4.22	3.18	3.65	12.9	11.07	12.86	9.56	10.95	9.54	7	7.39	7.92	7.75	7.12	9.54
	Potri.006G237000	3.27	3.16	3.42	2.27	1.4	1.29	5.53	3.78	4.63	3.92	4.02	3.46	3.45	3	2.95	3.58	2.47	3.51
	Potri.006G237100	53.76	52.39	51.97	104.59	111.64	96.36	73.62	79.78	71.88	75.4	75.64	70.36	63.56	41.67	58.78	56.77	63.43	53.09
	Potri.007G023300	0.83	0.72	1.01	1.4	1.13	1.54	0.99	0.33	0.4	0.73	0.58	0.66	0.77	0.68	0.67	1.12	1.02	0.98
	Potri.008G058000	0.67	0.79	1.13	0.76	0.81	0.75	0.43	0.68	0.62	0.44	0.82	0.55	0.4	0.46	0.77	0.81	0.75	0.74
	Potri.008G063900	1.57	0.69	0.31	0.07	0.15	0.24	0.08	0	0.22	0.29	0.15	0.24	0.97	0.87	0.68	0.88	0.56	0.32
	Potri.008G073700	0.82	0.7	0.75	6.08	6.73	7.24	2.22	2.83	2.09	2.01	1.15	1.3	1.28	0.79	0.92	0.99	1.1	0.78
	Potri.008G073800	2.03	1.73	2.78	5.62	4.51	5.78	1.5	1.81	1.76	1.87	2.18	1.91	1.87	2.27	1.86	3.1	2.7	2.56
	Potri.009G034500	0.24	0.37	0.27	1.08	1.19	1.08	0.11	0.26	0.13	0.24	0.39	0.16	0.22	0.28	0.23	0.39	0.3	0.37
	Potri.009G042500	0.21	0.82	0.4	5.07	4.99	4.45	1.06	0.94	0.9	0.92	1.01	1.05	0.83	0.64	0.86	0.47	0.59	0.46
	Potri.009G102700	1.17	0.85	1.51	0.66	0.85	0.93	0.29	0.22	0.36	0.35	0.21	0.38	0.16	0.16	0.23	1.14	0.88	0.85
	Potri.009G156600	0	0	0	0.16	0.06	0.05	0.06	0.04	0.01	0.17	0.13	0.05	0.03	0.01	0	0.04	0.02	0.02
	Potri.009G156800	0.03	0	0.03	0.64	0.87	1.16	0.41	0.37	0.47	0.37	0.57	0.4	0.04	0.18	0.03	0.09	0.03	0.11
	Potri.010G183500	1.74	1.42	1.7	7.62	9.03	8.39	2.46	4.59	3.1	2.18	2.12	2.84	2.05	2.5	2.19	2.66	3.73	2.47
	Potri.010G183600	0.35	0.99	0.57	8.02	8.45	9.18	2.4	2.77	2.35	2.44	2.69	2.59	2.37	1.8	1.63	0.92	0.95	0.69
	Potri.010G193100	3.73	3.54	3.76	26.68	29.38	25.04	21.95	19	21.71	23.76	23.6	19.39	16.15	10.57	12.37	8.54	9.22	8.06
	Potri.010G201400	0.71	0.92	0.35	0.07	0	0	0.21	0	0	0.05	0.05	0.03	0.11	0.11	0.08	0.03	0.3	0.05
	Potri.011G071100	0.47	0.45	0.9	0	0	0	0	0.06	0.08	0	0	0	0.06	0.05	0	2.01	1.34	1.94
	Potri.011G120200	0.81	0.95	1.14	3.66	3.78	3.6	1.13	1.51	1.92	1.78	1.36	1.24	1.97	1.47	1.43	1.08	1.49	1.01
	Potri.011G120300	1.95	2.28	2.25	10.17	9.74	10.64	5.59	5.58	3.75	4.16	4.81	4.38	6.02	4.61	5.57	3.46	3.2	3.57
	Potri.013G152700	0.69	0.43	0.42	2.74	2.63	2.46	0.89	0.75	0.96	0.72	0.68	0.7	0.38	0.35	0.57	0.39	0.31	0.06
	Potri.014G100600	31.07	32.87	30.96	84.17	76.44	84.13	90.75	90.58	82.64	54.11	52.59	50.68	36.88	42.11	42.7	36.31	34.8	37.14
	Potri.016G112000	1.08	1.25	1.16	4.51	4.01	4.46	2.1	2.84	2.95	3.28	2.65	2.79	2.05	1.58	1.64	1.66	2.25	1.8
	Potri.016G112100	0.31	0.09	0.04	0.6	0.95	0.98	0.13	0.95	0.5	0.79	0.41	0.44	0.31	0.15	0.43	0.38	0.5	0.2
	Potri.017G131800	97.9	94.24	96.53	21.45	20.99	21.15	53.43	55.97	55.81	61.06	61.46	65.02	57.74	53.11	53.41	93.24	93.76	98.36
	Potri.019G088600	0.19	0	0.02	0	0.11	0	0.06	0	0.01	0	0	0.03	0.03	0.03	0	0.1	0.22	0.05
	Potri.019G121700	1.31	1.21	1.28	2.38	2.25	2.2	1.89	2.22	1.75	1.69	1.48	2.14	1.23	1.02	1.67	0.98	0.94	1
	Potri.019G124300	1.21	1.51	1.24	2.81	2.83	3.5	2.73	2.2	2.89	2.6	2.76	2.88	2.13	1.99	2.27	1.6	1.47	0.96
MYB	Potri.017G126000	0	0	0	0	0	0	0	0	0	0	0	0	0	0	0	0	0	0
	Potri.002G130200	0.396672	0.556854	0.301378	0.387293	0.224129	0.488305	0.16807	0.210015	0.378223	0.249658	0.234785	0.006175	0.22116	0	0.137872	0.118151	0.10619	0
	Potri.001G314800	43.7701	45.5108	46.3236	31.5318	27.2779	31.8017	33.5352	35.7448	35.0496	43.0201	42.0007	42.4759	28.1839	28.5561	26.4379	32.959	32.6805	32.5314
	Potri.004G036900	11.0082	10.6472	10.2424	3.74677	4.23296	4.60736	14.0963	13.5543	13.8858	15.496	17.2912	15.2125	9.54338	12.3277	11.1307	10.4848	9.57255	10.2631
	Potri.019G006600	0	0	0.05986	0.079695	0.134768	0.085242	0	0	0	0	0.117962	0.200451	0.048233	0.07504	0.151824	0.083379	0.180964	0
	Potri.001G028400	24.5275	25.3048	24.241	23.9674	24.6275	24.0884	28.6017	30.7265	30.3226	26.3082	27.0864	26.1691	28.4464	28.3865	27.3077	26.1858	26.4681	26.3467
	Potri.016G117000	9.10483	7.41194	8.92559	2.7603	1.26087	2.20249	3.622	3.37375	4.24902	5.01533	6.61111	7.6905	5.46008	6.05807	6.68368	5.9535	7.50445	7.85161
	Potri.003G087700	13.1563	12.8732	14.7608	17.6998	19.2576	17.5783	9.50804	11.6982	11.0262	12.8613	10.4542	10.8506	12.4777	11.8222	10.7706	11.371	12.0909	14.6402
	Potri.010G233500	10.3325	10.8856	10.2894	6.35819	8.58812	6.93259	12.1622	11.5925	12.4861	10.6035	9.89761	5.82707	10.2151	10.5823	10.5499	9.66858	10.7448	9.13332
	Potri.010G174100	27.1516	28.7958	28.0821	23.5117	25.8714	26.4305	30.2415	31.9733	29.001	26.7236	22.0475	29.1784	22.9577	21.8899	22.5449	26.711	27.6676	29.5355
	Potri.018G075600	0	0	0	0	0	0	0	0	0	0	0	0	0	0	0	0	0	0
	Potri.017G075000	0.450198	0.486398	0.28364	0.139495	0	0.071671	0.274345	0.20783	0	0	0.057503	0.103969	0.092983	0	0.371527	0.151147	0.171163	0.289623
	Potri.008G062700	4.38128	3.46551	3.60446	3.58125	4.30793	3.58594	3.42559	2.9048	4.00503	3.80626	5.16988	4.14728	4.94613	4.58407	4.08071	4.7879	4.60949	4.75274
	Potri.005G074500	0.400686	0.045956	0.19698	1.30632	1.16021	0.714114	2.8342	2.80848	2.09247	2.44793	2.60912	1.92183	1.56394	1.54552	1.27332	0.224271	0.692575	0.458565
	Potri.007G134500	0.63856	0.728458	0.760121	1.36136	1.45875	1.3539	1.6179	1.73992	1.88848	1.35982	1.03265	1.3395	1.35838	1.01724	1.49273	0.802241	1.41221	0.56834
	Potri.009G053900	1.19006	1.1703	0.678602	5.63204	5.06692	5.44153	3.54847	3.3032	3.25564	2.85362	3.18637	2.32556	2.21988	1.36188	1.62367	1.68856	2.385	2.33262
	Potri.017G085200	0.116511	0	0.148886	0.077519	0.173595	0.25131	0	0	0.026054	0	0	0	0	0	0.029901	0	0.032295	0.03278
	Potri.001G228600	0	0	0	0	0	0	0	0	0	0	0	0	0	0	0	0	0	0
	Potri.017G082500	3.01033	4.02251	4.10335	1.89581	1.98957	1.49153	2.58835	2.34957	2.15587	3.17744	2.75284	2.56844	2.57937	3.60803	3.03641	4.12384	4.06892	2.87646
	Potri.012G042100	15.3734	14.4853	14.0384	17.7034	18.6787	17.3655	12.2874	10.8713	11.2948	11.1272	11.8659	11.9794	12.4723	14.112	12.3556	14.271	12.6221	13.4363
	Potri.009G116600	0.070402	0.170563	0.074348	0	0.075068	0.199941	0	0	0	0	0	0	0.098881	0	0	0	0	0
	Potri.004G215100	0.279023	0.222849	0.42308	0.794611	0.752056	1.03867	0.538863	0.695615	0.362945	0.381426	1.09124	0.487116	0.797807	0.571574	0.539226	0.188876	0.520283	0.162997
	Potri.011G003500	23.7188	24.7365	23.617	10.2996	9.97207	9.85404	22.7009	23.1639	23.5233	22.1432	25.1895	23.6848	17.3889	18.2359	19.0337	23.3681	22.921	22.0443
	Potri.006G175900	0	0	0	0	0	0	0	0	0	0	0	0	0.067697	0	0	0	0	0
	Potri.013G154500	14.9356	13.1219	13.9419	9.26453	8.89067	8.57038	14.4262	12.6276	10.3768	13.4008	14.9237	12.7301	12.4782	12.3977	12.4217	13.3231	12.0076	12.0624
	Potri.001G014200	0	0	0	0	0.280917	0.063615	0	0	0	0	0	0	0	0	0	0.044001	0	0
	Potri.010G167900	10.4097	10.0925	10.9102	13.0314	13.1302	13.0786	10.6244	8.73432	11.9032	11.1089	10.2546	12.8095	10.0023	8.6038	11.4134	10.6199	10.6351	10.911
	Potri.007G025200	0.159838	0	0.052276	0.319047	0.139026	0.095452	0.487761	0.352529	0.452909	0.092804	0.155915	0.279988	0.343562	0	0.35203	0.733201	0	0
	Potri.016G032600	11.1312	8.63503	7.82474	13.6553	9.42408	13.1408	12.31	10.9728	7.63667	14.2778	11.2675	14.5393	12.8007	8.1874	8.00977	10.8226	10.5868	10.3115
	Potri.010G020900	6.92277	9.21588	7.74924	5.22415	4.85954	4.41226	8.45287	7.74903	4.70785	8.21217	6.96151	7.59442	6.66446	9.12684	6.93874	5.15179	7.16944	8.41595
	Potri.010G186600	0	0	0	0	0	0	0	0	0	0	0	0	0	0	0	0	0	0
	Potri.014G103700	2.96592	3.01877	2.66377	3.96001	4.36327	4.44321	7.24527	5.74183	7.31872	4.13305	3.28149	3.23473	5.63649	5.73092	5.83796	3.7109	3.39001	3.26491
	Potri.019G036400	0.254443	0.812476	0.326585	0.33822	0.67981	0.415606	0.406496	0.751249	0.506056	0.688599	0.46197	0.653051	0.938145	0.48475	0.987631	0.711522	0.612407	0.963034
	Potri.013G130900	1.22174	1.83129	1.32574	0.252003	0.252659	0.341288	1.16576	1.04914	1.34411	1.83146	1.36716	2.07036	1.48685	1.14622	1.5798	1.34466	1.61252	0.950046
	Potri.003G079500	50.0395	52.5056	52.2471	33.6157	31.4038	30.504	34.6802	40.0801	38.261	38.2033	36.7676	34.4745	37.9186	35.4357	39.335	47.0516	52.1114	48.4436
	Potri.001G393500	0	0	0	0	0	0	0	0	0	0	0	0	0	0	0	0	0	0
	Potri.007G088100	0	0	0	0	0	0	0	0	0	0	0	0	0	0	0	0	0	0
	Potri.006G097300	6.70311	5.5423	6.42381	8.2036	7.29515	8.86436	9.73835	8.90525	7.69134	8.64532	8.79742	7.93757	6.78822	6.77929	7.33606	6.13457	6.71607	6.48499
	Potri.002G185900	2.10934	1.92853	3.31149	6.1916	5.46127	5.92321	3.38648	3.23727	3.70644	1.70444	2.60607	2.08632	2.59438	2.70223	2.53606	2.64564	3.12909	3.45639
	Potri.005G191700	23.6927	24.4661	22.877	17.6956	17.0029	18.2032	28.2584	26.4417	27.8871	26.8025	28.2752	26.9159	26.5784	23.1157	25.4045	26.4278	24.7047	22.8311
	Potri.010G019600	6.89008	7.34043	8.057	4.54508	4.15237	4.46497	5.78128	5.34895	7.03273	6.24931	5.43317	7.93099	7.1187	6.77617	6.34331	7.68732	8.63514	6.79612
	Potri.010G128900	27.8697	29.3987	27.749	30.8842	31.4598	30.385	38.5898	38.1497	37.1825	32.0763	32.2785	29.7331	38.7087	35.0644	35.7439	33.5973	34.5646	34.4465
	Potri.001G228500	0	0	0	0	0	0	0	0	0	0	0	0	0	0	0	0	0	0
	Potri.001G470500	2.17557	2.24116	2.21151	1.61445	1.67519	1.64689	2.17324	2.77603	2.04839	2.38029	2.92299	2.0757	2.32816	2.01656	2.00144	2.08849	2.4144	2.18761
	Potri.018G058800	0.092752	0.0944	0.042649	0	0.268527	0	0	0	0	0	0	0	0	0	0.055966	0	0	0.157282
	Potri.001G142200	46.848	47.7496	45.8857	30.0853	27.6067	30.736	67.9336	63.5401	65.4091	60.3913	57.6971	57.2879	55.0957	54.6384	53.5953	62.6836	60.7658	61.2061
	Potri.019G081500	2.58799	1.767	2.42538	1.78966	1.78229	1.71313	1.15008	0.987711	1.85498	1.25514	1.45846	0.905631	1.42864	2.42218	2.04317	2.33066	1.36241	1.96514
	Populus_trichocarpa_newGene_1250	0.796213	0.854987	0.972884	0.292868	0.51847	1.06227	1.01967	1.61537	1.05663	1.71278	0	1.06217	0	0.645699	1.69415	1.38479	0.901943	0.472554
	Potri.010G193000	30.8637	30.7417	29.7808	16.6919	15.2402	15.7554	21.2746	21.3612	22.3786	27.5148	28.7973	27.6367	19.936	17.4907	17.0834	22.285	24.7793	24.4778
	Potri.004G057900	0.242183	0.193699	0.191119	0.408962	0.188448	0.350901	0.347905	0.560229	0.398599	0.184212	0.23507	0.141241	0.347327	0.566951	0.139018	0	0	0.04427
	Potri.016G083900	19.284	15.0399	17.0858	23.5368	22.6036	20.8654	4.00961	2.97679	2.99749	5.57825	4.53738	5.15588	10.2224	11.628	8.40313	11.2745	10.454	11.1377
	Potri.003G064600	8.15119	7.13512	9.38337	10.4575	8.99312	9.25613	8.81372	7.33947	9.18336	7.09278	5.64867	8.02695	6.83286	6.31545	6.52964	6.29573	7.48687	7.76908
	Potri.004G168200	0	0	0	0	0	0	0	0	0	0	0	0	0	0	0	0	0	0
	Potri.017G017600	0.895063	0.071642	0.423613	0.113919	0.696242	0.800103	0.634147	0.402911	0.611791	0.723364	0.962204	0.477921	0	0.298636	0.892956	0.406273	0.610199	0.315208
	Potri.006G034900	12.2575	12.9028	11.6416	19.6106	20.3994	19.2147	11.1244	19.2538	12.2003	19.4739	19.673	18.6245	11.1313	18.0067	17.4103	13.0333	15.8601	17.1498
	Potri.006G086500	0	0	0	0	0	0	0	0	0	0	0	0	0	0	0	0	0	0
	Potri.T098000	0	0	0	0	0	0	0	0	0	0	0	0	0	0	0	0	0	0
	Potri.005G191900	22.3094	19.655	22.8731	12.5296	12.1852	12.7388	26.2138	26.0092	24.3671	25.8366	25.127	25.7157	17.5158	19.0409	20.0855	21.1433	19.5473	21.1746
	Potri.001G208400	0	0	0	0	0	0	0	0	0	0	0	0	0	0	0	0	0	0
	Potri.002G005600	21.9706	18.8286	18.4789	14.9415	21.795	21.3974	20.5255	14.6058	15.0838	14.2309	15.1916	17.5791	16.7508	22.4392	13.5952	15.1801	20.8501	13.7578
	Potri.006G085900	9.96059	11.0419	11.5994	11.1815	12.2042	12.4123	10.1686	12.4976	12.7453	10.4464	10.5039	12.0722	21.7895	22.4097	23.2817	8.97521	8.71003	6.60872
	Potri.012G080400	2.78816	2.65046	3.41112	11.482	8.58104	9.3499	7.37699	5.06078	5.27446	1.98653	2.39225	3.12922	4.73718	4.63718	4.50114	2.57321	3.11755	2.80312
	Potri.003G190900	23.0506	23.3093	21.3059	10.9327	9.30739	11.5417	18.1756	18.1206	19.0089	17.9459	19.7735	20.7807	18.7954	18.421	20.8162	21.1598	20.0119	21.3992
	Potri.017G112300	14.6766	15.7805	17.2503	15.2141	15.7722	17.9887	8.59882	10.1607	10.0821	7.47954	8.63967	8.28477	11.1357	11.1309	12.0993	9.58786	9.15938	10.1006
	Potri.005G163200	0	0	0	0	0	0	0	0	0	0	0	0	0	0	0	0	0	0
	Potri.011G041600	0.608879	0.374379	0.28895	1.79554	2.268	2.09486	1.3773	1.80666	1.85031	0.705	0.834005	0.742972	1.79496	1.66785	1.57919	0.483837	0.335348	0.446354
	Potri.007G007900	4.27215	4.95681	5.00474	9.56436	10.2261	10.4463	8.80664	9.21764	10.0404	8.61472	10.0663	8.59326	7.9115	6.48559	7.36305	3.79786	3.35913	6.29952
	Potri.003G079100	0	0.333897	0	0	0	0	0	0	0	0	0.116765	0	0	0.140247	0	0	0	0.406739
	Potri.001G147000	18.6435	19.1594	18.7897	25.1532	21.5676	21.1321	20.6124	22.3914	20.5031	20.9624	20.2216	20.7889	24.71	24.2632	23.23	21.5888	21.3242	22.7479
	Potri.002G139500	8.98611	8.98782	9.08288	6.10433	6.27456	5.66059	6.46199	6.42205	7.00853	6.82167	6.83814	7.41774	7.24183	7.63641	7.78469	7.56622	8.43588	6.91137
	Potri.003G092200	29.976	33.44	30.8799	27.4447	26.9859	27.2949	39.2869	41.0381	41.2632	30.0962	31.4185	32.6254	33.9431	34.4433	34.5545	44.383	42.3919	42.6059
	Potri.018G049500	0.468419	0.546605	0.493985	0.238447	0.290648	0.301414	0.236461	0.680493	0.222306	0.749774	0.615221	0.479733	0.299755	0.61978	0.494348	0.470712	0.4877	0.409579
	Potri.008G128500	1.23114	0.714884	0.842725	1.16256	1.38017	1.8116	0.278054	0.546486	0.902839	0.519697	0.820093	0.673252	0.976095	0.92469	1.09518	0.846149	0.81181	1.16572
	Potri.009G017700	9.56123	10.5601	9.04463	12.341	10.6926	11.0918	7.60603	8.89595	8.72652	8.69937	9.44859	9.80767	11.2785	10.4428	9.19358	9.06813	8.81903	8.64901
	Potri.007G093900	0.256408	0.685345	0.405767	3.64438	3.87222	3.58205	2.31918	2.75814	2.07361	1.5385	1.63781	1.38827	0.970562	1.6958	1.71156	0.868633	0.78631	0.543329
	Potri.005G001600	3.44146	2.20908	2.24228	7.5309	8.31231	7.86696	5.68363	6.95835	7.71594	3.50005	5.02827	4.93921	3.38718	3.66792	4.23989	2.63471	2.9947	2.44933
	Potri.001G146200	34.0065	34.4186	31.9112	40.5212	41.6509	42.067	23.0729	22.086	21.292	20.0981	20.4463	20.1443	28.3811	27.7851	27.9574	29.7198	28.8989	31.0004
	Potri.008G173400	0	0.07552	0	0.176182	0	0	0	0	0	0	0	0	0	0.069319	0	0	0.072301	0
	Potri.009G007100	0.467507	0.363082	0.458093	1.79225	0.840957	1.47135	1.14728	0.814743	0.956568	0.252135	0.54033	0.399722	0.43632	0.236126	0.673454	0.252735	0.050632	0.401429
	Potri.002G040600	57.044	49.8529	50.9533	34.9056	44.0681	42.3917	59.1923	53.6548	50.65	56.0499	50.9586	58.8254	52.3367	50.4378	46.2774	54.718	59.4184	47.9153
	Potri.003G195300	12.5876	7.54976	0.116091	12.7923	10.2194	10.5528	15.8765	14.8637	15.9499	12.9264	24.709	20.7252	11.192	8.2559	10.9336	0.149465	10.1202	8.87389
	Potri.014G079300	0	0	0	0	0	0.03615	0.042576	0	0	0.123046	0.290464	0.081022	0.070477	0.035427	0.135922	0.243855	0.243547	0
	Potri.001G219100	5.87553	4.07725	5.28383	2.32913	3.1006	2.69408	4.14599	2.93524	3.55008	7.17412	6.34994	7.3102	2.37916	1.84316	1.71252	3.96438	3.93083	3.12485
	Potri.001G297800	0	0	0	0	0	0	0	0	0	0	0	0	0	0	0	0	0	0
	Potri.018G151400	0	0	0	0	0	0	0	0.047334	0	0	0	0	0	0	0	0	0	0
	Potri.017G071500	0	0	0	0	0	0	0	0	0	0	0	0	0	0	0	0	0	0
	Potri.011G167600	0.486085	0.177073	0.384619	0.539667	1.06298	0.823168	0.268228	0.174537	0.779406	0.109368	0	0.296219	0.28563	0.626721	0.191457	0.344572	0.152881	0.245297
	Potri.010G165700	5.24799	5.17069	4.87704	2.39995	2.35523	1.12731	2.12075	3.4049	2.81386	1.42012	1.87109	1.29632	2.356	2.10976	1.90865	1.67943	1.90546	1.37366
	Potri.019G118800	0	0	0	0.109316	0	0.069269	0	0	0	0	0	0	0.182459	0.180071	0.221188	0	0.344927	0.211381
	Potri.017G128900	18.6826	19.9746	18.8844	15.6722	15.3031	17.7761	16.7377	18.5135	16.0808	17.8618	17.0354	18.199	17.7091	19.9046	19.8753	15.6051	16.9519	18.0597
	Potri.010G055000	12.9699	14.9862	13.9107	10.8548	10.3131	10.1334	9.02036	7.6588	8.61978	9.70676	10.1742	8.71753	9.67371	11.6385	11.2023	12.1835	9.84447	11.7002
	Potri.005G224100	0.405241	0.959838	0.476965	0.911605	0	0.649703	1.26362	0.51799	0.414552	0.555222	0.529795	0.506624	1.22844	0.992364	0.898597	1.41185	1.51605	1.59527
	Potri.001G086000	3.40598	3.5093	2.75456	4.79046	4.23098	3.52894	2.42161	2.51361	2.24098	2.13638	1.77388	2.75526	3.54145	3.60998	4.05013	3.1875	2.2686	2.26457
	Potri.010G195000	2.66705	1.63336	2.64225	2.26361	2.05178	1.7621	1.86724	2.59061	1.97483	2.28553	2.07077	2.65523	3.05513	2.89518	2.53634	2.95664	2.42845	3.1382
	Potri.018G074200	16.6456	18.0099	16.4286	13.1306	13.3356	15.5505	16.2438	13.0163	13.9512	14.4121	13.9362	13.3936	13.7286	13.833	13.8258	15.0063	13.7381	16.0407
	Potri.017G137600	4.94801	5.44957	4.86852	3.77606	3.77628	4.01157	4.79973	5.37572	5.19024	4.77022	5.68835	4.93296	3.99301	4.72243	3.89634	4.17805	4.46625	3.85689
	Potri.019G032700	14.1263	15.379	15.6804	11.6312	11.675	12.2651	12.3033	12.878	12.3584	10.4334	10.4324	11.6152	13.2259	11.9619	11.9219	11.2049	13.2455	12.5499
	Potri.001G280000	0	0	0	0	0	0	0	0	0	0	0	0	0	0	0	0	0	0
	Potri.001G236600	0	0	0	0.055233	0	0	0	0	0	0	0	0	0	0	0	0	0	0
	Potri.002G180800	53.8568	61.047	61.5686	135.324	133.309	140.215	3.14046	2.89051	3.44516	2.27135	3.10099	2.79363	18.3117	19.9746	19.9874	41.4526	39.9166	40.3842
	Potri.012G084100	0.141518	0.573838	0.282053	1.66822	1.30288	2.29409	1.51578	1.08794	0.953023	0.754213	0.702269	1.10336	0.789126	0.317235	0.391725	0.474836	0.868918	0.629926
	Potri.007G118700	0	0	0	0	0	0	0	0	0	0	0	0	0	0	0	0	0	0
	Potri.018G049200	0	0	0	0	0	0	0	0	0	0	0	0	0	0	0	0	0	0
	Potri.005G205900	1.86709	1.41649	1.9351	1.9173	4.44653	2.38512	1.10339	2.26691	2.37757	1.52052	1.17553	2.05531	3.59159	3.07185	2.45107	4.30482	2.77903	3.57877
	Potri.001G346600	0	0	0	0	0	0	0	0.214822	0	0	0	0	0	0	0	0	0	0
	Potri.001G250000	0	0	0	0	0	0	0	0	0	0	0	0	0	0	0	0	0	0.084102
	Potri.010G093000	8.89025	7.97743	9.87421	5.26425	5.60809	6.61551	5.4348	4.95532	6.01742	6.34384	6.57509	7.42061	7.62808	6.85504	6.67176	8.825	9.88515	9.09108
	Potri.003G198800	4.66882	3.88981	5.05443	3.85914	3.17889	3.65602	6.07129	4.67343	4.56384	5.58631	4.56138	5.60801	4.28087	4.25518	3.65003	4.77545	4.94879	5.06958
	Potri.007G048900	65.8829	67.1974	65.9264	35.1743	35.1149	37.2919	5.80857	85.1722	83.2894	69.0039	64.9659	66.7478	45.9147	41.6317	0.18234	66.7951	68.7404	70.4469
	Potri.008G071700	1.10477	0.811285	0.821848	0.255428	0.458656	0.657615	1.48375	1.28367	1.11716	1.50651	0.880602	1.61141	0.472882	0.840235	0.765882	0.646011	0.677339	0.346544
	Potri.001G170200	19.2744	21.8649	20.9555	12.5542	12.434	12.5188	24.6401	24.6746	22.9764	25.5113	26.8841	27.9896	20.3821	22.3135	20.1591	18.0951	19.0924	21.2295
	Potri.008G070900	0.154089	0.230916	0.027775	0	0.212727	0.109521	0	0.178615	0.617536	0.467693	0.089783	0.424236	0.186013	0.147705	0.565031	0.080425	0.038381	0.3194
	Potri.011G067200	0	0	0	0	0	0	0	0	0	0	0	0	0	0	0	0	0	0
	Potri.003G114100	9.40509	8.05729	7.7455	9.20645	7.83915	7.00692	16.2446	15.7144	17.1669	18.7213	20.0566	17.1784	12.7972	6.91444	10.0109	9.64006	12.9079	9.61076
	Potri.008G180800	0	0	0	0	0	0.174018	0	0	0.030549	0	0	0	0	0	0	0	0	0
	Potri.008G122100	12.9116	12.4253	13.6403	3.74585	3.04596	2.52576	4.06462	3.89112	3.68067	3.78868	3.23495	3.21165	2.90703	2.33666	3.07289	7.91981	7.17321	7.30609
	Potri.010G099600	1.43339	1.58163	1.45611	1.56084	1.6685	1.97803	3.21879	3.19225	3.26702	3.81418	4.09801	2.92978	1.87778	2.39244	2.16114	1.54923	1.77403	1.4172
	Potri.002G068400	10.7967	11.2589	11.1585	9.16565	8.95102	9.26215	10.5041	10.4086	10.5417	12.3303	8.99795	10.4525	10.3824	8.78089	8.48441	10.4468	10.497	10.6998
	Potri.003G049100	6.76901	9.69043	9.37409	6.04068	6.132	6.96888	6.97053	4.33737	6.21676	7.59118	5.73958	5.84307	7.64055	7.38501	7.53033	9.21033	8.76839	8.90937
	Potri.008G135500	20.2106	22.7853	20.3757	16.2826	17.836	17.1726	20.8933	24.0191	22.6332	24.2069	23.4656	22.7759	20.6988	21.2356	22.1515	21.5769	19.2661	21.161
	Potri.012G095800	12.1849	12.0582	12.5311	4.84152	4.84876	5.18053	7.81253	7.74994	8.70327	10.9344	11.173	11.2685	11.2211	12.9935	10.9678	10.7251	10.3472	10.9419
	Potri.001G336700	0.431087	0.394287	0.319008	0.767099	0.7745	0.707384	0.359725	0.194021	0.300727	0.329257	0.841042	0.63806	0.256014	0.307687	0.601027	0.562883	0.119035	0.276451
	Potri.003G144300	1.53108	2.0196	2.05731	1.83573	2.32322	2.11798	1.62123	1.48764	2.31572	1.70763	1.5741	2.15649	2.58284	2.50478	2.64164	1.7878	2.23258	2.3297
	Potri.008G064200	19.6737	18.2133	18.7652	23.8276	26.0536	25.3226	20.8098	20.065	25.3597	24.2089	22.4565	21.8762	21.2218	21.248	20.411	17.5759	16.4207	18.6545
	Potri.003G200000	5.54823	3.92712	4.05797	3.4565	4.14397	3.81781	4.96296	6.24884	5.84068	6.0873	4.6163	4.59142	4.37054	4.04649	3.13622	4.3832	5.09275	4.55491
	Potri.007G061700	7.96353	7.38634	7.29291	5.85057	4.50769	4.80363	6.51223	7.22631	5.96671	6.07877	6.78257	6.82781	7.40494	6.96927	4.95877	6.4245	5.21078	6.68924
	Potri.017G125600	0	0	0	0	0.177637	0.084974	0	0	0	0	0	0	0	0	0	0	0	0
	Potri.014G117400	16.1408	16.3903	16.5665	13.4737	13.0647	15.0071	13.031	13.6665	14.0852	15.7953	14.8093	14.7124	13.8946	14.7956	14.2537	14.9448	14.3807	12.865
	Potri.014G051200	39.1424	39.0513	36.4223	29.2842	31.7557	32.1961	36.5813	32.7819	36.9231	32.6393	33.5331	34.9717	38.274	33.3666	32.482	35.9044	37.4695	40.0672
	Potri.006G196700	0	0	0	0	0	0	0	0	0	0	0	0	0	0	0	0	0	0
	Potri.018G038000	5.91482	5.21975	5.6514	7.7394	8.1465	8.2642	6.204	6.26832	5.70947	6.78933	6.7777	6.9645	5.73705	5.80621	5.64722	5.48376	5.23729	4.81112
	Potri.011G125900	0.285059	0.146704	0.163759	0.352403	0.248821	0.2159	0.043144	0	0.211429	0.106474	0	0	0.048721	0	0.107408	0.139831	0.099455	0.182377
	Potri.006G275900	3.34115	3.59167	3.35339	6.38598	8.14628	6.79467	2.24727	2.8687	2.45001	3.01142	2.7049	2.3474	3.51564	3.37068	4.40058	2.09344	3.5602	3.00724
	Potri.001G309100	4.51827	15.6305	15.3821	8.00068	8.44091	9.08368	5.35552	15.7811	3.39691	4.10345	4.05187	5.29818	14.6712	13.3894	3.96536	3.24375	17.8121	15.3641
	Potri.002G113700	3.88731	2.85544	3.36941	2.89739	2.64103	2.7512	4.04448	3.81113	4.27911	5.29327	5.62798	4.50943	3.93539	3.81727	3.96417	3.15273	4.60102	3.31908
	Potri.008G213500	7.05526	7.60303	7.50734	8.22421	8.74339	7.50978	6.70588	8.14917	8.87577	8.06453	8.57737	8.07248	7.26709	7.00787	6.06416	6.42471	6.96081	8.39691
	Potri.012G066400	0	0	0	0	0	0	0	0	0	0	0	0	0	0	0	0	0	0
	Potri.002G068700	10.9883	10.3847	11.3392	12.557	12.6751	13.8801	12.7914	14.2766	13.5478	11.1889	15.2812	13.0364	11.1321	11.578	11.2575	12.3225	13.0699	12.4171
	Potri.006G117300	30.9621	33.0177	30.8281	13.532	13.0837	15.3798	30.2593	27.7567	29.8027	30.6419	31.5397	30.1398	25.1215	24.9303	23.3797	29.2237	27.1689	28.0815
	Potri.017G144800	47.2907	46.3686	45.9492	22.0357	19.7853	21.2633	35.4906	32.6943	35.962	42.6658	46.1069	42.2043	25.5891	26.5742	26.2958	38.0101	37.3601	36.8424
	Potri.018G111300	3.35406	3.03572	3.7013	3.63534	3.97596	4.10446	3.22987	3.15895	3.45544	3.86206	3.35404	3.19515	3.51791	4.05371	3.91058	3.00554	3.16858	2.60322
	Potri.016G005900	8.92219	9.40475	11.0591	3.26031	3.47855	3.54175	10.6572	10.0625	10.2214	8.89696	11.0752	9.3543	12.5369	13.0667	10.4766	11.7696	11.3269	11.3738
	Potri.017G146800	8.57711	8.8204	7.93813	6.93383	6.18164	6.28005	14.6045	12.8742	14.7474	15.0247	15.0025	17.8058	10.6373	10.5309	11.048	6.61506	8.7406	7.97833
	Potri.002G128900	0.569646	0.572917	0.623155	1.77557	2.49842	1.99707	1.56279	2.05865	1.19959	0.5017	0.630294	0.926931	0.836315	0.870701	0.992171	1.88502	2.07382	2.66461
	Potri.002G177000	0	0	0	0	0	0	0	0	0	0	0	0	0	0	0	0	0	0
	Potri.008G089200	0.211548	0.62072	0.191046	1.17964	0.514646	0.334201	0.304283	0.309127	0.368321	0.108441	0	0.053985	0.374723	0.433208	0.304227	0	0	0
	Potri.001G035800	12.7437	14.5175	12.8853	10.6251	9.90693	10.1403	15.0341	12.8063	13.9571	12.7761	13.6563	15.5644	14.9403	16.8809	17.3626	14.6818	14.0216	13.0958
	Potri.003G096300	6.51175	8.70965	2.12425	11.5319	13.1083	12.8808	9.63339	3.77517	9.64375	5.34433	11.0148	7.76344	3.88261	10.717	11.3465	8.01302	8.3744	5.60737
	Potri.008G148400	12.3292	11.3274	10.7619	11.9615	12.9303	12.1181	18.2287	18.1256	17.8547	17.9295	17.5163	15.6045	13.0948	12.3275	12.025	11.8522	12.0174	12.0331
	Potri.001G036000	2.36	2.22925	2.57087	1.88559	1.59504	2.20052	1.83787	1.51393	1.89403	2.43191	2.42223	2.17824	2.28667	1.80747	2.02393	2.2112	2.60824	2.17512
	Potri.011G088800	0	0	0	0	0	0	0	0	0	0	0	0	0	0	0	0	0	0
	Potri.016G112300	13.9342	14.6107	15.4858	15.0769	17.6866	14.7556	22.2563	20.057	22.5127	20.5605	20.5214	19.0289	13.7451	14.3386	16.5274	13.9394	13.1824	14.0096
	Potri.014G117000	0.630931	0.664674	1.4155	0.635668	0.464633	0.722725	0.912991	0.52533	0.640248	0.420128	0.315138	0.295517	0.526855	0.663359	0.658942	0.826084	1.51232	2.0345
	Potri.016G007600	5.08369	5.63198	6.26449	4.43664	4.28399	4.11552	4.14239	4.70935	4.56304	5.15589	5.45572	5.21965	5.14205	5.32423	4.9845	4.39546	5.04673	5.43888
	Potri.008G179700	15.9349	14.2479	15.8519	12.1143	14.1082	11.6707	14.6044	13.7716	14.949	14.9514	14.8582	14.7918	13.2742	14.9413	13.6866	13.6415	15.6536	13.7415
	Potri.018G095900	0	0.173772	0.046715	0.083529	0	0.041398	0.080861	0	0	0.14461	0.103415	0	0	0	0.038375	0.181264	0.043325	0.043975
	Potri.001G103600	36.9761	38.046	38.8285	37.8447	43.4437	39.249	37.8022	38.2815	39.2232	38.5642	38.5134	39.049	43.9992	40.0396	43.6205	49.9916	47.4194	48.3473
	Potri.003G219900	2.27388	2.85798	2.62066	2.59169	3.33324	3.13802	1.95669	2.46876	2.64075	2.10427	2.21184	2.10455	3.46895	2.86418	2.63827	2.72048	2.77393	2.98161
	Potri.014G166300	7.13097	8.03583	7.90158	9.17407	7.47992	7.0835	8.7739	8.45957	6.89357	9.17816	7.60847	6.58222	9.44806	8.97564	8.68015	7.30169	8.7396	7.99233
	Potri.006G234200	1.94925	2.74017	1.63121	1.54927	1.20693	2.14894	1.16816	0.913045	1.29524	1.69628	0.920306	1.69332	1.78903	2.32453	1.08748	1.40005	2.06081	1.88758
	Potri.017G125800	0.094037	0.422328	0.183899	0	0	0	0	0	0	0	0.305632	0	0	0.070594	0	0	0	0
	Potri.016G098000	0	0	0	0	0	0	0	0	0	0	0	0	0	0	0	0	0	0
	Potri.016G001200	38.7851	37.5866	39.609	43.3551	41.2638	40.9154	38.0184	41.7061	44.7088	39.0086	40.1574	38.3064	35.3585	38.7583	35.1413	33.959	36.9209	35.2571
	Potri.006G170800	0	0	0	0	0.056708	0	0	0	0	0	0	0	0	0.05019	0	0	0	0
	Potri.018G049700	0.902662	0.531906	0.651392	0.231446	0.242844	0.247314	0.236764	0.701819	0.80893	0.591758	1.10798	0.826634	0.535244	0.885922	0.991577	0.623687	0.562898	0.573831
	Potri.001G216900	66.5795	62.548	67.8802	46.4437	45.0512	45.0166	47.7008	53.1374	53.3066	57.7791	59.0828	58.4877	56.6475	58.301	57.4284	57.6069	57.3761	55.0096
	Potri.019G010200	3.04291	3.6698	4.19075	3.75286	4.11995	3.57943	3.58927	4.15464	3.74786	3.95175	4.99323	3.83994	4.44982	3.41302	4.33279	4.47575	4.16738	4.04143
	Potri.005G153700	0	0	0	0	0	0	0	0	0	0	0	0	0	0	0	0	0	0
	Potri.008G081800	5.17826	5.98991	9.03357	4.43286	4.76964	4.878	8.49163	7.34637	8.96889	10.0024	7.38176	7.56915	5.40487	6.24783	5.1669	5.95319	5.5073	8.29435
	Potri.005G134600	51.1564	51.1251	47.9715	35.0676	37.879	36.7444	43.4271	43.2763	41.9727	41.8834	42.7002	44.2634	45.915	46.0907	44.206	61.0739	64.3948	67.1557
	Potri.008G027000	10.1295	11.3684	9.02401	9.27316	10.2857	8.75615	10.8991	7.75466	8.53417	7.75613	10.7505	9.52393	10.8497	10.0579	8.56847	8.81792	10.915	9.95058
	Potri.011G026300	29.8569	30.9349	33.6938	13.8319	11.6224	12.7675	28.0023	29.0012	26.7748	24.2395	21.824	25.3759	25.1802	25.9433	22.7011	32.2927	33.4354	31.8896
	Potri.008G025600	1.43666	2.1012	1.91419	6.41515	6.33622	5.96309	3.93107	3.26438	3.13711	2.27562	1.96566	2.29189	2.42057	3.02308	2.08858	3.00008	2.60248	2.84337
	Potri.010G185700	0	0.170971	0.357981	0.164441	0.093785	0.354466	0.481592	0.463994	0.653035	0.219981	0.372344	0.485352	0.437157	0.405915	0.883047	0.146097	0.084912	0.513112
	Potri.019G050900	1.02606	1.6018	1.28672	1.3442	1.05453	0.752356	1.32991	1.78634	1.9564	1.34171	1.03308	1.47765	1.19266	1.49907	0.961635	1.5325	1.29938	1.30235
	Potri.011G006300	0	0	0	0	0	0	0	0	0	0	0	0	0	0	0	0	0	0
	Potri.003G007500	0	0	0	0	0	0	0	0	0	0	0	0	0	0	0	0	0	0
	Potri.004G097600	0	0	0	0	0	0	0	0	0	0	0	0	0	0	0	0	0	0
	Potri.004G138000	1.582	1.34963	1.24534	3.09253	3.03031	2.97162	1.34451	1.44069	2.14075	1.05616	2.20444	1.32471	3.18856	1.68917	2.27493	2.01926	1.17929	1.73321
	Potri.013G001000	0.473097	0.671546	0.559874	2.01269	1.71097	1.81516	1.91699	1.82556	1.42521	1.28622	1.11057	1.04056	0.680294	0.936441	0.47833	0.721592	0.530524	0.179726
	Potri.003G163000	19.7896	20.9903	17.525	14.6457	11.4215	11.8883	19.795	18.6562	17.1378	19.2898	19.5186	19.1358	19.1161	18.8241	16.13	20.1664	19.7629	18.3437
	Potri.012G072500	0	0.038882	0	0	0	0	0	0	0	0	0	0	0	0	0	0	0.126835	0.028483
	Potri.006G262100	40.6641	43.7601	41.0428	35.1387	33.2431	33.7805	36.1841	37.3964	36.3803	37.2681	39.6982	40.292	38.9794	40.213	39.9633	43.5172	43.0064	41.3378
	Potri.015G129100	0.36273	0.697731	0.322847	1.72841	1.87719	2.14129	2.57389	2.58767	2.575	2.26581	3.05903	1.80312	1.38633	0.616633	0.960558	1.00735	1.43737	1.00244
	Potri.019G045900	6.79374	6.95436	5.3065	3.93208	3.86549	4.01084	3.87326	3.16902	3.37255	3.07301	3.23999	3.85245	3.56103	2.69741	2.93481	4.60068	4.42434	3.70112
	Potri.017G120900	6.34979	6.89421	5.51194	4.94513	5.16056	6.29292	5.35063	5.14356	5.38166	5.9584	5.06643	6.53288	5.63042	6.06872	5.91822	5.14276	5.17797	6.46638
	Potri.002G056700	0	0	0	0	0	0	0	0	0.158661	0	0	0	0.19566	0	0	0.046428	0	0
	Potri.007G067600	0.82521	0.309226	0.35319	0.905196	0.620805	0.967782	1.15189	0.648692	1.05986	1.279	0.775114	0.829282	0.371316	0.231869	0.381534	0.336669	0.335819	0.408407
	Potri.010G186200	0.350333	0.35513	0.239359	0.310116	0.14988	0.316697	0.702099	0.257738	0.265114	0.526147	0.735518	0.698636	0.410275	0.386966	0.243769	0.387885	0.346621	0.418538
	Potri.011G023600	4.24896	3.29247	3.47584	6.69396	5.54674	6.0622	7.35237	7.40014	5.81954	5.61921	7.36929	6.70835	4.62418	5.51746	5.6855	3.81055	5.05285	3.00046
	Potri.016G108300	0	0	0	0	0	0	0	0	0	0	0	0	0	0	0	0	0	0
	Potri.004G073300	11.7393	9.97912	9.71018	11.0861	10.4225	9.74317	11.9035	11.1269	11.7973	11.0797	12.9934	9.93055	11.9112	11.1244	12.5025	10.843	9.85233	10.879
	Potri.001G086700	0	0	0	0	0	0	0	0	0	0	0	0	0	0	0	0	0	0
	Potri.012G117500	1.06222	1.40974	0.889028	1.21958	1.28519	1.11156	0.903994	1.87333	1.18962	1.18978	0.983111	0.759907	1.23015	1.46111	1.18588	0.556208	0.769081	0.163419
	Potri.013G046300	13.6048	14.9236	13.8713	12.4231	14.6332	13.6112	12.7136	12.6237	13.3502	12.6614	14.3717	14.0279	14.8412	16.4986	15.9919	13.8224	12.9408	14.1885
	Potri.008G081600	0.434929	0.623267	0.853103	2.21156	2.31951	1.92992	2.22872	2.0206	2.92571	1.84028	2.27888	2.43171	1.66092	2.41502	1.89111	1.05451	1.18979	0.926043
	Potri.T056500	0	0	0	0	0	0	0	0	0	0	0	0	0	0	0	0.050544	0	0
	Potri.003G204700	7.5391	8.51244	6.28431	5.63222	5.41817	5.46217	4.92562	6.61506	5.28576	6.23225	5.76145	6.31033	5.78589	5.68261	7.00875	6.68916	7.00197	6.71185
	Potri.018G054500	0	0	0	0	0	0	0	0	0	0	0	0	0	0	0	0	0	0
	Potri.002G176900	8.32079	9.06701	8.28159	11.7445	12.4208	12.2022	13.0844	14.5428	11.8203	8.36688	8.65868	9.94076	13.3119	11.8741	11.1092	8.05611	10.4371	10.7793
	Potri.001G150600	4.00524	5.05268	4.92796	4.52103	4.04093	3.99344	2.91071	3.28946	2.98383	4.25773	3.20115	3.2849	4.51968	4.54619	3.88749	4.21262	4.59154	4.6249
	Potri.015G075800	1.21204	0.946669	0.372659	0.835579	0.185508	0.569518	0.206359	0.364153	0.759675	0.504052	0.317638	0.886904	0.615116	0.351101	0.834246	0.656214	0.348665	0.40534
	Potri.001G197000	0.036215	0.175126	0.049978	0.114986	0.105015	0.04861	0.130866	0.042558	0	0.07823	0.040934	0.116837	0	0.028503	0.02004	0.195026	0.105234	0.15353
	Potri.006G122100	1.91401	2.10166	2.1224	2.01893	0.853034	0.645206	3.39297	1.93153	3.28594	3.36995	2.76775	2.76112	1.67277	1.76362	1.96987	1.20759	1.72918	1.36263
	Potri.018G094700	0	0	0	0	0	0	0	0	0	0	0	0	0	0	0	0	0	0
	Potri.006G191000	1.03542	0.824626	0.961504	0.887597	0.459524	0.536496	0.801531	1.21936	1.43133	1.00811	1.29739	0.911663	1.02591	0.722285	1.09274	0.788369	0.51802	0.730732
	Potri.015G100400	21.1021	19.5074	19.1302	14.9081	14.3191	16.6318	18.4159	19.4691	17.5394	18.8608	17.5813	17.2822	16.8632	18.8221	18.2358	18.823	19.1414	19.0527
	Potri.002G054100	4.1012	4.24513	3.77947	5.78548	6.17777	6.14645	2.18237	2.40885	2.27033	2.78406	2.27661	1.95577	4.21164	3.96235	4.06767	2.89757	2.43439	2.82156
	Potri.002G198100	0.529627	0.88844	0.738758	0.426914	0.303696	0.532421	0.343433	0	0.612081	0.192688	0.253689	0.472358	0.208582	0.545958	0.430765	0.3128	0.533097	0.422278
	Potri.016G096300	4.82991	3.78741	4.08753	1.33174	2.09119	1.88402	6.27358	5.36764	5.04417	4.46052	3.67201	3.35124	6.58345	7.32483	6.77163	5.29032	5.1905	5.00651
	Potri.013G149200	0.788003	0.992578	1.10804	2.63525	3.06035	3.10165	1.18641	1.35885	1.69432	0.380965	0.699975	0.417794	1.22672	2.06609	1.86455	0.810652	0.330726	0.497588
	Potri.007G076200	55.056	59.2612	54.8102	22.6808	27.664	26.4334	54.4772	56.2022	58.6714	68.8602	63.3938	68.1454	46.6677	45.7412	44.7969	45.7474	47.3986	51.5645
	Potri.001G075400	0	0.033537	0.122453	0.082242	0	0.041045	0.314897	0.227495	0	0.424784	0.101484	0.111062	0	0.13929	0	0.08899	0.042374	0.044189
	Potri.015G082700	1.27826	1.78744	1.10224	6.27583	7.53715	5.59372	3.56175	3.52394	3.23317	3.90748	2.74405	2.37161	2.90288	1.73516	2.08021	2.30061	2.04905	2.14406
	Potri.006G085600	13.3829	11.1952	11.8152	7.99568	8.5847	8.87353	14.2932	14.2032	14.3894	15.0242	14.2076	16.0011	12.0574	11.244	10.7383	10.8061	12.061	9.47554
	Potri.018G049600	0	0	0	0	0	0	0	0	0	0	0	0	0	0	0	0	0	0
	Potri.006G265900	15.1043	15.1261	16.3356	6.40741	7.26139	6.75617	13.0055	12.5246	12.6859	16.1059	17.1306	15.8225	16.193	16.5114	15.7552	14.9994	15.6911	15.0833
	Potri.017G008500	0	0	0	0	0	0	0	0	0.058447	0	0	0	0	0	0	0	0	0
	Potri.015G039600	0	0	0	0	0	0	0	0	0	0	0	0	0	0	0	0	0	0
	Potri.006G150300	7.37427	8.3123	7.27888	2.51874	3.98241	3.19617	9.08794	9.30195	9.32269	11.4998	11.8957	11.1038	6.30242	5.48679	5.99561	6.39032	6.40112	7.08589
	Potri.001G113600	9.14131	10.3508	9.34998	9.1136	8.44433	7.76905	9.10048	9.29696	10.4546	8.59983	9.75287	9.22995	9.51794	9.72648	9.36799	9.47306	9.94579	9.76358
	Potri.001G155300	14.8517	14.1792	13.6115	12.5569	10.5788	12.3965	12.797	12.3664	13.4171	15.4355	12.0001	12.6285	14.6823	14.1119	14.5683	13.5758	15.6157	14.8782
	Populus_trichocarpa_newGene_2343	1.37749	2.90595	0.887805	2.80644	0.988371	2.22655	0.535411	0.349697	0.436161	0.400147	4.28732	0.648555	2.04457	1.06187	0.394516	0.465264	1.42737	0.898054
	Potri.005G029000	4.12635	3.64074	3.51702	2.56462	2.44692	2.34193	2.8916	3.09473	1.79385	1.98446	2.27959	2.69954	2.70883	3.11561	2.83585	3.18595	3.12723	2.72562
	Potri.005G122200	3.26342	4.36945	4.12024	0.107471	1.52374	1.66307	2.113	1.94797	2.0822	4.78655	2.26883	2.93924	2.92527	3.10109	2.97292	1.87434	2.33049	3.17282
	Potri.009G042600	28.133	26.7811	29.7754	26.6042	26.329	25.7874	29.845	29.1043	30.9844	31.9945	29.9572	28.3674	26.0568	25.745	27.2154	22.0491	24.5776	21.9266
	Potri.001G189800	19.9839	18.2351	16.5853	17.1745	17.9318	18.5497	15.6815	15.0455	16.6482	16.4007	15.4903	18.3967	14.2726	17.2496	15.8073	17.3839	18.1947	18.3481
	Potri.T098900	15.7176	16.471	15.3122	9.38934	7.38097	8.91747	7.9033	7.22084	10.1285	11.1511	13.187	12.3274	9.68057	8.64434	9.05161	7.71917	9.33518	8.6065
	Potri.010G215600	0	0	0	0	0	0	0	0	0	0	0	0	0	0	0	0	0	0
	Potri.002G243400	16.1685	13.138	16.5482	12.5386	13.6174	12.5316	11.796	11.241	10.6615	12.2956	13.195	14.7696	12.1232	13.4842	12.7616	13.8542	12.1156	13.0092
	Potri.008G117500	8.39865	7.24738	7.9651	12.5114	13.3172	11.0775	9.86587	12.0037	9.90932	9.60181	8.1764	8.45269	9.49216	9.45391	10.686	11.9086	10.6575	10.0146
	Potri.007G039400	24.5982	26.0279	22.3726	17.3952	16.5741	15.1847	33.8768	35.1593	35.8942	31.1469	26.0497	30.2359	25.1682	27.0244	29.6753	30.3379	33.1524	29.8743
	Potri.004G172900	2.22703	1.88858	2.18623	3.55588	2.62105	2.86155	3.19417	2.41562	2.99433	2.23244	1.66817	2.04494	5.1641	4.32712	3.1177	2.77884	2.91895	3.14062
	Potri.007G092000	0	0	0	0	0	0	0	0	0	0	0	0	0	0	0	0	0	0
	Potri.014G111200	9.06817	8.91988	8.19641	7.02989	17.6619	6.9392	9.63757	10.7134	10.9612	4.96178	9.06121	9.22344	8.12352	8.13188	2.92248	10.7457	8.7126	11.6974
	Potri.010G105600	10.1967	10.9649	10.3733	9.22373	8.64181	8.77426	9.04373	8.29972	8.94875	9.313	9.50083	8.61749	8.76035	9.29285	9.63446	10.4907	8.92319	9.44992
	Potri.001G099800	2.31675	1.76053	1.63274	4.31558	4.30626	4.26632	3.85137	3.61032	3.42285	3.91169	3.50259	3.13775	2.85316	2.25246	1.96003	1.98356	2.28813	2.10294
	Potri.017G125900	0	0	0	0	0	0	0	0	0	0	0	0	0	0	0	0	0	0
	Potri.008G189600	0	0	0	0	0.042012	0.02822	0	0.043699	0	0	0.043045	0	0	0	0	0	0	0
	Potri.004G015100	44.8271	39.0536	36.7779	44.5016	46.1511	46.6827	25.7124	25.1968	27.8464	28.8396	27.6068	30.04	31.1074	29.052	30.3371	38.3478	34.9737	38.1675
	Potri.017G062600	0	0	0	0	0	0	0	0	0	0	0	0	0	0	0	0	0	0
	Potri.001G229300	13.4952	12.699	12.418	10.2428	9.9203	10.6521	10.1806	9.58286	9.18643	10.993	12.5778	11.4204	9.73848	8.59627	9.08867	9.96395	9.38693	11.209
	Potri.018G002800	3.06932	3.71764	4.19462	3.29041	6.55504	3.71066	4.84588	4.8285	4.40904	4.01136	3.85873	3.82582	5.46266	4.59004	5.05091	3.91314	3.88418	3.79154
	Potri.004G174400	14.3239	11.7346	13.2686	18.6694	19.7795	19.9179	21.8967	19.2272	18.1607	16.8633	17.8073	15.6252	16.4227	12.9711	14.567	9.8925	11.2655	10.926
	Potri.016G100800	0	0	0	0	0	0	0	0	0	0	0	0	0	0	0	0	0	0
	Potri.018G049000	0.195818	0	0	0	0	0	0	0	0.134368	0	0.074109	0.113545	0	0	0.220113	0.177869	0.220278	0
	Potri.006G133000	10.9114	10.1741	9.95435	11.342	12.0378	10.9224	5.63268	4.81946	4.24243	5.11663	5.52484	7.15012	8.82293	9.18937	8.70824	8.64778	10.6753	11.2683
	Potri.012G060300	0.426711	0.649793	0.785657	0.796006	0.753703	0.987394	1.0575	0.490285	0.923071	1.06037	0.834484	1.13241	1.2288	0.7539	0.783299	0.559264	0.850956	0.884213
	Potri.009G027300	105.629	113.411	106.635	46.7412	45.1858	49.8058	91.6759	97.4196	65.5041	107.08	76.0666	73.797	58.5921	52.8051	38.8029	64.8463	95.366	55.8034
	Potri.002G200600	6.01375	6.55018	6.79348	3.81194	3.44095	4.74827	6.73575	6.29608	7.81852	7.38261	6.77391	6.09629	5.99211	4.88623	5.47128	5.20471	5.58027	5.80727
	Potri.008G172900	0	0	0	0	0	0	0	0	0	0	0	0	0	0	0	0	0	0
	Potri.004G088100	5.25999	6.59646	5.05268	5.27118	4.73114	6.2842	3.88513	3.6066	3.97405	5.15275	3.5745	3.88828	5.09592	5.12519	6.49201	4.61509	4.86345	4.88214
	Potri.014G096300	2.21551	0.496064	0.663014	0.530257	0.771227	0.34155	0.373398	0.569238	0.725001	0.514681	1.2892	0.932866	0.83287	0.921222	0.93782	0.672565	0.244174	0.200343
	Potri.001G066900	7.412	6.41758	6.28941	10.5736	9.59059	10.8696	8.99815	7.50136	7.72466	8.27713	6.9704	7.09725	9.60115	8.59626	9.84064	8.61449	8.53695	9.37943
	Potri.006G090000	12.4708	12.4278	12.9293	20.2725	19.0812	15.7628	15.8773	15.0561	15.4477	16.6012	16.6557	17.1792	14.2324	14.0734	14.2702	11.0697	14.8907	11.5298
	Potri.012G073900	70.9618	74.8388	73.0477	27.3512	29.4352	25.3329	48.7409	53.3177	50.5935	65.4608	65.8372	60.1439	51.7557	50.3357	47.7823	62.825	68.3851	62.1102
	Potri.001G169600	0.13098	0.094563	0.134353	0.223717	0.232768	0.485897	0.147661	0.572214	0.374982	0.456122	0.17928	0.164371	0.276358	0.240731	0.401909	0.309113	0.158231	0.255213
	Potri.010G149900	2.06413	1.93572	2.5303	0.826477	0.409576	0.966078	1.09567	0.96919	0.416366	1.2224	0.812162	0.937804	1.63	1.52482	1.53455	3.1269	2.82114	2.97466
	Potri.014G037200	0.97842	0.718675	1.42408	2.51425	2.55665	3.26857	1.34052	1.21485	1.14124	1.23698	1.3215	1.46236	1.29518	1.946	1.51151	1.02981	1.40754	0.90527
	Potri.006G017300	12.3366	11.7146	11.5228	11.5838	12.0563	12.1553	9.28098	8.58962	9.08748	11.1917	10.6827	10.6752	11.377	11.4454	11.8552	11.6029	12.4337	13.7429
	Potri.001G258700	0.643241	0.236251	0.508266	1.5964	2.08997	1.0006	1.19899	1.0026	1.20537	1.03239	0.718557	0.886322	0.603167	0.489954	0.487659	0.865217	0.351082	0.265379
	Potri.010G001000	13.4905	18.7764	16.0735	14.6091	16.5662	15.772	14.218	12.6949	15.0998	18.1328	17.4818	14.819	12.1417	15.3341	14.9171	17.3316	17.1157	15.9626
	Potri.010G096400	40.6631	39.8093	38.7107	41.3949	41.383	39.7188	38.8371	41.917	37.9984	31.2938	34.4571	34.0355	25.8664	28.2039	27.1501	29.5922	34.155	31.1135
	Potri.015G030400	17.3151	16.6192	16.692	10.7098	9.49055	8.64922	12.1055	14.7714	11.4097	11.786	11.3769	11.9989	11.493	13.8721	12.166	15.8428	16.6405	17.2514
	Potri.015G095000	0.369345	0.386599	0.696597	0.040206	0.349103	6.21526	0.101005	0.699339	0.258656	0.948801	11.6281	0.934334	1.19279	0.454011	0.321526	9.41218	0.573471	0.119993
	Potri.015G031600	4.35592	4.80733	4.97297	4.19816	4.81834	5.25881	4.18091	4.40648	4.68185	4.59369	4.18402	4.86997	3.89283	4.33793	3.79723	4.59164	4.56856	5.08146
	Potri.005G112000	3.80209	2.9703	2.65784	3.19451	3.21258	3.00291	2.65896	2.87448	2.52293	4.12323	3.98758	4.16369	4.45805	3.61022	3.70775	2.97027	3.02793	2.79685
	Potri.005G221100	28.3449	26.2052	29.2279	25.4033	24.9251	24.0844	22.3028	21.144	23.1584	23.2708	23.2414	25.0924	28.0424	28.2163	29.0141	26.4562	26.5002	26.7498
	Potri.005G051700	1.62049	1.41974	1.6722	1.20102	1.3811	1.37453	2.26171	2.28815	1.81717	1.1777	1.36648	1.7076	1.50864	1.28316	1.11309	1.44806	1.1773	1.25728
	Potri.006G005300	1.4335	1.18556	1.0383	0.617298	0.819987	0.557592	1.38929	1.76469	1.28886	0.825678	1.70008	0.892333	1.36246	1.45904	0.94197	1.00835	1.26447	1.06697
	Potri.006G116400	1.14695	0.757791	1.51793	1.14266	0.838859	1.43097	1.71298	1.14792	1.00856	1.14943	1.35432	1.75185	0.886882	0.822196	1.37971	1.06528	0.968389	0.992363
	Potri.014G099700	10.9187	10.5061	9.57953	11.6445	11.1062	11.1171	10.4139	11.3743	11.8516	8.63732	10.0874	8.72023	11.5007	12.9664	12.9027	12.5223	12.5919	13.1531
	Potri.017G072700	0	0	0	0	0	0	0	0	0	0	0	0	0	0	0	0	0	0
	Potri.009G117200	0.986622	0.78084	0.625582	0.711034	1.12663	0.833436	0.675381	0.943544	0.512351	0.337133	0.524566	0.755269	0.772383	0.732587	0.916817	0.481037	0.585752	0.654617
	Potri.014G100800	0	0.184539	0	0.357243	0.445196	0.774329	0.195775	0	0.259229	0.131178	0	0.099264	0.322292	0.372702	0.061948	0.375611	0.124994	0
	Potri.003G144200	0.303649	0.885705	0.367985	1.08878	1.37387	1.63194	1.14636	1.01578	0.760599	0.433259	0.518308	0.391396	1.13298	0.587952	0.480084	0.49352	0.574184	0.524216
	Potri.002G188100	6.79853	7.03407	5.66744	2.1174	1.2742	1.57574	1.88327	1.74795	1.54069	2.88314	4.10525	4.85846	2.33015	1.48353	2.1758	3.69199	4.23054	3.46244
	Potri.001G026000	15.8051	14.7703	16.9251	10.8498	10.9027	10.2408	18.2138	15.2139	17.1697	18.25	19.2731	16.9908	11.5192	11.8881	12.5904	12.1159	11.483	14.1174
	Potri.012G031200	1.9384	1.87376	3.11197	2.53899	2.24654	2.9283	1.09415	1.66196	1.3389	1.33776	1.51783	1.94331	2.10102	2.04365	1.65185	1.2805	1.23929	1.15587
	Potri.008G071300	20.8051	20.2038	19.5442	14.9562	15.9891	14.8681	19.1031	18.4207	19.9973	25.3855	23.7414	33.9417	15.8114	14.3133	14.8739	15.5134	19.8747	19.1212
	Potri.008G189300	0	0	0	0	0	0	0	0	0	0	0	0	0	0	0	0	0	0
	Potri.002G163100	9.31134	11.1484	9.16579	9.35902	7.67954	8.16136	6.7104	6.47865	6.48193	7.41288	8.68928	9.04545	7.28475	6.14281	7.61928	9.24024	8.20101	8.17198
	Potri.006G066400	1.06139	0.811219	1.26919	0.310311	0.583581	0.404808	0.813674	0.839683	0.605528	1.21542	0.601476	0.881847	1.25081	1.3812	1.18383	1.23348	0.892945	0.59272
	Potri.012G127700	2.32978	2.51468	2.51755	3.82125	4.73876	3.34935	4.37533	4.39471	3.91586	4.11826	3.71688	4.55956	3.20904	2.16681	2.09636	2.59005	3.42898	2.52331
	Potri.014G091900	0	0	0.129331	0.157635	0	0	0.084596	0.139516	0	0	0.083888	0.186055	0	0	0	0	0.056114	0.037604
	Potri.009G096000	3.11405	1.92082	2.61534	1.63507	2.44527	1.6604	2.47469	2.09806	2.49602	2.0799	2.75875	2.15196	2.1888	2.51757	2.18888	2.53049	2.20642	1.88143
	Potri.001G005100	3.19301	3.362	4.07823	4.12885	2.95724	3.97475	2.09286	1.72981	1.63711	2.60288	1.64155	2.20445	2.49184	2.13011	2.29431	2.40078	1.40998	2.20055
	Potri.014G022500	32.6092	34.2412	32.9643	18.5861	18.1104	19.0313	50.5966	52.6118	53.4713	33.5712	36.7307	33.2645	34.3432	34.8225	33.4759	56.7341	50.1036	50.7807
	Potri.001G133400	9.13875	8.2444	10.4605	10.6706	9.93178	9.34465	9.5876	11.8569	10.2851	7.97912	7.81413	8.58644	6.17924	7.99296	7.83384	9.1183	8.43709	9.29402
	Potri.002G159400	5.26131	5.09075	5.30883	8.71095	8.05293	8.08497	3.9023	4.79563	3.75198	4.0223	3.91576	3.86628	3.61367	4.5084	4.69634	4.54847	6.52223	3.43652
	Potri.005G130600	0	0	0	0	0	0	0	0	0	0	0	0	0	0	0	0	0	0
	Potri.008G016400	1.03953	3.19799	2.02084	2.47998	1.33166	1.35536	2.71207	1.86024	1.87737	2.88959	2.01931	2.1364	1.85195	2.68217	1.66371	2.35908	2.16601	2.53562
	Potri.002G228700	0	0	0	0.099791	0	0	0	0	0	0	0	0	0	0	0	0	0	0
	Potri.014G026000	0	0	0	0	0	0	0	0	0	0	0	0	0	0	0	0	0	0
	Potri.017G054800	20.0694	17.5792	15.5775	19.3982	16.5764	18.8004	12.3383	11.3586	11.7197	15.5297	14.1236	12.1718	15.2295	14.3028	13.4125	15.5847	14.9994	16.9413
	Potri.006G230500	0.089717	0.14191	0	0	0	0.335853	0	0.202802	0.147083	0	0.049388	0.191639	0	0	0.10461	0.192136	0.100473	0.386732
	Potri.017G130300	1.45685	1.35736	1.2588	2.0448	2.45524	2.04093	2.27841	2.30292	2.51001	2.11956	1.83009	1.16931	2.62594	2.0104	2.86102	2.60841	3.4735	2.16243
	Potri.006G221800	14.7337	9.47258	9.26659	13.161	15.3717	12.6806	13.3166	15.2819	12.5754	16.6568	11.6757	11.0221	8.75689	8.16565	12.307	9.52403	10.3533	11.0651
	Potri.010G045700	0	0	0	0	0	0	0	0	0	0	0	0	0	0	0	0	0	0
	Potri.005G222500	33.9302	32.5512	31.9937	34.7114	34.1161	33.2503	36.7325	34.1778	36.7714	37.8237	37.7181	37.1352	38.719	34.4073	36.5552	44.3665	44.107	42.44
	Potri.018G127700	2.94876	5.42039	4.05297	9.62795	9.70481	10.5111	3.23718	2.99642	3.23906	2.50549	3.94284	3.16322	6.50441	6.09171	6.56368	4.8013	5.99374	7.03289
	Potri.007G106100	0.979571	1.26412	1.24338	2.07791	2.27643	1.79723	4.94058	3.34318	2.86817	3.13342	3.64647	2.97076	2.37729	2.2149	1.98174	1.71525	2.15962	1.88874
	Potri.016G091700	6.60586	8.00266	7.4602	7.67012	7.09673	6.10986	6.06326	6.76818	6.6409	6.33789	6.72033	5.89615	6.05055	6.9283	5.66799	7.97702	6.12145	7.71446
	Potri.014G054700	0	0	0.037476	0	0	0	0	0	0.187326	0	0	0	0.053803	0.094738	0.15233	0	0	0
	Potri.004G033100	0.683137	0.654948	0.793251	0.462224	0.509078	0.307293	0.250621	0.524989	0.286121	0.457242	0.570071	0.220491	0.133813	0.088487	0.099066	0.107047	0.043333	0.28598
	Potri.015G041100	0	0	0	0	0	0.19749	0	0	0.119429	0	0	0	0	0.054916	0	0	0	0
	Potri.019G040900	0.9392	0.315838	0.686081	1.9178	1.4913	2.37885	0.753434	0.826357	0.732498	0.528543	0.217306	0.621983	0.902873	0.816986	1.05955	1.42996	1.1984	1.60567
	Potri.001G080300	0	0	0	0	0	0	0	0	0	0	0	0	0	0	0	0	0	0
	Potri.019G118900	4.78978	5.06894	4.29299	7.04867	6.0965	5.69997	5.00674	3.60093	4.05313	3.52351	3.8416	3.85955	9.17232	9.57148	10.0869	5.11752	3.68561	5.09236
	Potri.006G126300	29.2918	29.0162	28.4817	32.8171	30.1458	33.5033	24.0413	24.2033	22.5537	24.0927	25.746	22.9622	28.0076	26.2457	25.6173	27.0595	27.2116	27.6942
	Potri.011G040400	0	0	0	0	0	0	0	0	0	0	0	0	0	0	0	0	0	0
	Potri.003G132000	2.07919	2.53827	1.89883	8.01282	6.97785	6.50161	5.14074	3.41353	4.42179	5.01246	4.48259	4.76154	3.68758	2.37378	2.52752	2.43327	3.25172	2.37785
	Potri.006G279100	26.7674	26.6577	26.4518	21.4029	23.7598	23.7857	21.5022	21.5368	20.6988	22.4767	21.2251	23.1087	26.8213	24.0902	27.4404	24.9618	23.4307	23.3058
	Potri.017G086300	6.65386	6.01693	6.12149	4.9082	4.60579	6.87496	3.00515	2.82544	3.40809	2.78714	2.91332	3.25942	3.68535	3.43338	3.65471	4.05618	4.72271	3.97649
	Potri.014G081200	4.83967	6.07053	6.4606	4.77083	4.41582	3.9221	2.83189	2.80948	3.44691	1.85818	2.26675	2.9109	4.12003	3.19678	3.99324	2.82798	2.94236	2.80154
	Potri.007G003200	13.5138	10.0096	9.37055	28.342	15.3408	26.0636	7.95094	9.13778	5.72649	8.77526	9.04032	9.87932	9.3025	8.12468	12.2176	8.41082	5.56166	8.91085
	Potri.015G075600	1.30373	2.1023	1.4809	0.693129	1.30872	0.75773	0.654725	0.114935	0.129615	0.612154	0.482941	0.277257	0.454299	0.509543	0.599531	0.195186	0.347108	0.8345
	Potri.008G142000	0.047511	0.206283	0.050382	0.095719	0.259825	0.146462	0.069147	0	0.113237	0	0.148037	0.161961	0.051189	0.070491	0.11112	0.29589	0	0.050304
	Potri.016G117300	1.45227	1.94517	1.15152	0.744937	1.21453	0.85933	2.63571	1.16435	2.16768	1.61727	1.62737	1.29952	1.85771	1.05168	1.64487	1.37861	1.26066	1.26698
	Potri.001G248800	7.29481	7.85193	6.70334	6.25733	5.56598	5.90395	8.19795	7.87451	8.74812	11.179	9.2344	10.9647	9.56017	8.81728	8.66633	6.05743	6.80378	6.58302
	Potri.001G391700	0	0	0	0	0	0	0	0	0	0	0	0	0	0	0	0	0	0
	Potri.005G096600	0.301917	0.037058	0.133516	0.605192	0.320844	0.741083	0.388232	0.304268	0.515175	0.226781	0.232164	0.231465	0.169999	0.128635	0.072043	0.420594	0.445201	0.1397
	Potri.004G082400	1.57923	1.65074	1.89072	3.59763	3.38047	3.75773	2.79557	2.07106	2.38874	2.43014	2.41316	1.90434	2.12007	2.56042	2.75398	2.15831	1.84767	1.96902
	Potri.016G053300	5.16789	7.46964	4.96802	6.81677	5.04428	5.16712	4.89271	4.33345	5.63186	1.86568	4.1711	4.88949	6.5028	5.2925	6.23985	6.18396	4.57742	6.52094
	Potri.008G205600	25.8313	24.4166	26.0935	23.5644	24.6854	26.0736	18.9231	17.7128	17.2664	18.5969	19.2482	19.1937	20.2452	23.2448	22.2623	22.2654	23.6679	22.0721
	Potri.018G005300	0.154202	0.244547	0.285695	1.55629	2.00173	1.45122	0.417686	0.935937	0.355305	0.249016	0.285212	0.165832	0.679005	0.961444	0.512444	0.307078	0.238463	0.163236
	Potri.018G021300	11.55	14.7096	13.8736	13.782	12.4747	13.7942	12.2126	12.1223	11.6631	11.8029	11.6426	8.03178	13.5373	15.9792	13.936	15.0787	14.3012	14.7007
	Potri.016G121800	0.145806	0.097517	0.335923	0.096655	0	0.214821	0	0	0	0.045276	0	0.043727	0	0	0.035628	0.099592	0	0
	Potri.016G099200	3.90335	5.41201	3.66981	7.17838	7.20459	6.66711	5.45819	5.73609	5.60106	5.80819	5.82571	4.62311	4.6115	5.67601	5.10299	5.26939	5.69052	6.13508
	Potri.003G155700	0	0	0	0.741968	0.316683	0.632932	0.487839	0.950467	0.727641	0.386866	0.141813	0.111049	0.156326	0.832378	0.261081	0.110109	0.121413	0
	Potri.008G166700	3.07171	3.75392	3.22813	1.51699	1.47062	1.09056	2.90873	2.01595	2.77438	1.59503	1.96036	1.63423	4.18486	2.7561	3.98922	7.73365	6.21545	7.03496
	Potri.012G019600	0	0	0	0	0	0	0	0	0	0	0	0	0	0	0	0	0	0
	Potri.006G117500	3.96718	3.84542	4.85586	2.003	2.52475	2.4994	7.30782	6.72232	6.97933	3.76898	3.79867	4.02886	7.54188	7.84941	7.21307	5.59834	5.23887	5.37671
	Potri.014G000700	1.56049	1.57636	1.92395	2.54227	2.32215	2.5874	1.2495	1.45104	1.86667	1.39165	1.62175	1.72854	1.87287	2.3926	2.11481	1.16072	1.76031	1.0415
	Potri.001G454500	10.718	6.83629	2.62374	6.7477	6.10094	5.79817	5.76703	9.9715	6.38163	14.6454	6.03409	6.00033	4.67158	5.16604	5.60338	6.05252	5.23018	6.56042
	Potri.003G212500	2.90558	3.36623	2.44543	3.36803	2.81313	2.83508	2.18613	2.59248	2.34886	2.63177	3.00463	2.41542	2.36417	2.39146	2.0898	2.64374	2.93038	2.89526
	Potri.002G173900	1.19633	1.01786	0.778747	0.513011	0.613482	0.392145	3.1526	2.91918	2.30095	1.59803	1.66774	1.43305	1.57111	1.49093	1.69281	1.3082	1.27003	1.45247
	Potri.001G397800	4.62205	5.40778	4.67246	2.96049	3.1421	2.86353	3.13756	2.41944	3.22001	3.2604	3.55923	2.6646	5.20655	3.62532	6.27921	5.01222	5.79297	5.76671
	Potri.002G216700	0	0	0	0	0	0	0	0	0	0	0	0	0	0	0	0	0	0
	Potri.012G039400	0.994834	0.7957	0.65157	4.3724	4.94454	4.58796	2.74813	1.52483	2.28317	1.94487	2.04916	1.19761	1.65802	0.936737	1.54798	0.975802	1.36898	0.640132
	Potri.003G129800	8.49031	8.77875	7.6707	6.79039	4.83588	7.0886	9.27428	8.04771	8.71384	10.1226	10.2309	10.6845	8.25202	8.47076	8.01981	7.43492	8.65973	8.4003
	Potri.019G018200	0	0	0	0	0	0	0	0	0	0	0	0	0	0	0	0	0	0
	Potri.009G134000	20.0282	15.1845	14.1425	16.0921	13.447	13.5126	37.4115	32.7403	28.461	32.6751	31.3671	33.1627	15.1706	18.5387	17.2933	13.1332	15.5111	12.7284
	Potri.011G040200	0	0	0	0	0	0	0	0	0	0	0	0	0	0	0	0	0	0
	Potri.002G106500	12.035	13.7738	12.4925	11.877	11.9666	13.2099	10.8276	9.69804	11.67	10.9819	11.3019	12.5783	11.9556	12.0501	12.8373	13.9139	13.0241	11.5417
	Potri.014G035100	2.66578	3.1281	2.3113	4.08668	3.68628	3.76128	6.63214	6.73993	6.15676	3.38589	3.36877	3.1281	5.28785	4.05992	5.27041	7.68356	8.79002	8.84074
	Potri.002G038500	0.947129	0.607693	1.05278	0.187125	0.239333	0.114135	0.706379	1.42442	0.856162	0.177639	0.380034	0.633268	1.24481	1.59453	0.764233	1.67146	1.48169	2.14046
	Potri.002G035000	0.551079	0.197456	0.095108	0	0.148447	0.110498	0.244465	0.197723	0.140829	1.11127	0.278209	0.229922	0.319757	0.157842	0	0.139564	0.365419	0.551002
	Potri.001G360900	0	0	0	0	0	0	0	0	0	0	0	0	0	0	0	0	0	0
	Potri.002G080600	22.5697	21.6182	20.9015	18.0321	17.5231	17.6597	20.2608	20.2199	19.9041	21.0437	22.9177	21.4335	19.7283	20.4897	20.3406	19.4072	20.9028	19.4965
	Potri.001G019200	7.54556	8.11055	7.32751	5.89757	6.98634	5.42783	6.72999	7.0116	8.41282	7.43955	7.10701	6.87523	6.78828	7.54565	5.52423	6.0172	6.61368	7.03823
	Potri.004G153300	13.3188	13.3036	11.8081	11.1277	11.9801	12.5082	10.4213	11.1696	9.75819	10.4991	11.2158	11.6049	12.1684	13.2687	12.4388	11.2883	11.5647	11.4972
	Potri.014G177600	0	0	0	0	0	0	0	0	0	0	0	0	0	0	0	0	0	0
	Potri.002G206500	0	0	0	0	0	0	0	0	0	0	0	0	0	0	0	0	0	0
	Potri.006G101400	3.04009	3.03587	2.93948	0.964313	1.98158	2.17732	2.83003	2.81055	3.11648	1.46759	2.30755	3.46422	4.19774	2.91516	3.24383	3.49454	4.0789	3.22864
	Potri.019G061100	0	0	0	0.160031	0	0	0.087033	0.113025	0	0.033703	0.222617	0	0	0	0	0	0	0
	Potri.003G144900	3.53703	4.09053	3.36876	5.54001	5.70489	6.25046	2.93105	4.0261	2.91146	3.41408	3.51619	3.25185	5.59448	5.17629	6.12417	3.63829	3.6021	3.12656
	Potri.004G026600	0	0	0	0	0	0	0	0	0	0	0	0	0	0	0	0	0	0.054421
	Potri.019G118700	0	0	0	0	0	0.111004	0	0.275595	0.096665	0	0	0	0.403232	0.690189	0.105159	0.234804	0.11383	0.235565
	Potri.005G129200	0	0	0	0	0	0	0	0	0	0	0	0	0	0	0	0	0	0
	Potri.005G180800	26.417	25.4884	25.4092	16.4139	14.7466	15.6679	25.151	23.1688	25.9457	29.7289	29.6039	27.4921	25.6245	26.1434	26.8221	25.0085	24.0509	26.1374
	Potri.008G088000	0.164727	0.061971	0.151861	0.318518	0.063095	0.203122	0.554583	0.394144	0.29833	0.158081	0.212205	0.098593	0.355854	0.120758	0.278714	0.10381	0.151131	0.140894
	Potri.008G089700	0.809918	0.638006	0.46044	1.1745	1.59376	1.14953	0.499028	0.661612	0.666588	0	0.05167	0.141639	0.867574	0.755848	0.425164	0.166283	0.149217	0.156512
	Potri.002G152900	1.81377	2.126	1.43221	1.1404	0.993435	1.43517	1.20722	1.09046	1.11507	0.827733	1.43323	1.51689	2.15765	1.90888	1.92993	1.92508	1.74022	1.55305
	Potri.001G129900	5.13494	5.01026	4.82439	4.04649	3.50039	4.45376	4.56092	4.18087	5.47833	5.15968	6.20599	6.7112	4.554	4.97546	5.61324	6.91081	5.57027	5.76473
	Potri.013G148600	0	0	0	0	0	0.141239	0.22643	0	0.041237	0.041592	0.115913	0	0.080969	0	0.134733	0.051344	0.04856	0
	Potri.010G023400	10.059	11.7832	10.3522	10.4541	13.4588	10.1445	7.54747	6.72848	6.88052	7.96558	6.8423	8.32408	8.29607	9.69824	8.9392	10.364	9.25486	10.6962
	Potri.008G181000	9.2562	7.92478	7.77878	6.14973	6.31684	5.91141	6.94298	5.68721	7.36348	7.58947	9.03832	7.33987	6.79091	6.74614	7.2238	7.86758	7.35276	7.29199
	Potri.001G083500	0	0.168481	0.024383	0.242634	0.558873	0.157673	0.093282	0	0.171679	0.223805	0	0.037368	0.097389	0.12902	0.155569	0.340518	0.705781	0.207545
	Potri.005G135800	0	0	0	0	0	0	0	0	0	0	0	0	0	0	0	0	0	0
	Potri.011G040300	0	0	0	0	0	0	0	0	0	0	0	0	0	0	0	0	0	0
	Potri.008G226000	0	0	0	0	0	0	0	0	0	0	0	0	0	0	0	0	0	0
	Potri.003G094200	0	0	0	0	0	0	0	0.071986	0.073309	0	0	0	0	0	0	0	0	0
	Potri.006G221500	7.50082	6.47589	7.57554	23.7152	20.9382	22.1557	5.39909	6.26189	6.81968	3.92573	3.71682	3.61955	14.9516	15.0553	14.1892	1.95535	4.5352	5.21258
	Potri.014G024000	12.7068	15.7815	13.1245	8.44378	7.32993	7.30948	11.6178	10.0562	11.5715	12.0499	8.99778	10.0722	7.00313	6.37596	6.78531	9.14223	7.94567	5.92132
	Potri.015G022000	3.56311	2.20849	2.90432	5.13036	4.62072	5.8034	3.23441	2.57854	2.49345	3.537	2.80314	1.71117	2.42788	3.23332	1.86068	2.63075	1.95788	2.33682
	Potri.002G168900	0.513659	0.891772	1.23888	1.50398	1.69694	1.25845	1.54157	2.10761	1.3888	1.58823	1.90198	0.72997	1.02037	1.09211	1.10595	0.948053	1.33499	0.591843
	Potri.008G101400	3.63786	5.51089	5.89121	1.94631	2.15177	1.68053	3.70676	2.56777	2.571	2.65433	3.44616	3.21469	4.09488	4.54921	4.8036	6.48526	4.90091	5.93925
	Potri.006G155200	0.931419	0.875992	1.13021	2.66622	1.89966	2.99032	1.01815	1.3277	1.32406	0.947334	1.04365	0.824002	1.03215	0.564939	0.538137	0.918466	1.16274	0.734205
	Potri.003G128000	17.2977	17.4815	18.8304	7.54711	7.83765	7.49465	9.74243	10.1224	12.5773	10.7072	11.0422	14.1292	14.9826	15.8441	14.1339	16.2045	16.5683	16.7994
	Potri.018G102300	0	0	0	0	0	0	0	0	0	0	0	0	0	0	0	0	0	0
	Potri.T125000	0	0	0	0	0	0	0	0	0	0	0	0	0	0	0	0	0	0
	Potri.T144800	0	0	0	0	0	0	0	0	0	0	0	0	0	0	0	0	0	0
	Potri.014G189900	9.1449	9.29409	10.7223	7.25257	7.73038	7.89534	8.629	8.31745	8.43685	8.26259	9.13779	8.84487	7.82539	9.38266	9.14237	8.51908	8.32197	7.79498
	Potri.010G141000	0	0	0	0.190802	0.355839	0.048699	0.138877	0.237265	0.116688	0	0.324047	0.258856	0.138333	0.65782	0.155242	0	0.048945	0
	Potri.001G013600	3.49099	4.04362	3.94229	4.50265	3.63095	3.91259	3.40658	3.092	3.74736	3.67814	3.52337	3.2401	3.49209	3.96091	4.88819	3.50529	3.59753	2.91192
	Potri.004G126700	0.965801	0.975902	1.84737	0.217922	0.130702	0.527343	0.922353	0.818232	0.527326	0.411054	1.00885	0.730934	1.37645	0.87677	1.1747	0.839672	1.11624	1.38424
	Potri.012G082000	0	0	0.064477	0.171782	0	0.065602	0	0	0	0	0	0	0	0	0	0	0.040095	0
	Potri.005G142600	52.6754	54.5012	52.809	22.1572	22.6352	21.9533	34.7793	35.0922	35.3118	42.0192	43.3405	42.4041	33.832	32.8139	33.3278	47.2748	44.0193	47.6559
	Potri.008G087600	5.97448	13.6498	12.9414	16.7924	18.1414	19.5426	7.21138	12.9734	12.0935	12.9152	14.3032	5.37907	9.44951	11.0411	10.1819	4.15303	7.11602	7.79503
	Potri.005G087700	18.6879	21.311	18.4584	10.7675	11.5174	11.8277	22.0049	19.888	19.199	20.2285	21.9203	20.0158	17.7669	17.4544	18.901	21.8442	21.7669	21.0072
	Potri.004G074300	43.3318	39.5285	41.5157	17.5239	10.4235	17.3226	20.3328	21.9511	18.1678	25.8236	25.2917	27.3343	20.6023	21.621	21.0267	31.3203	31.349	31.3075
	Potri.007G023800	5.7524	8.18736	6.43373	8.24759	7.64331	7.97404	6.56103	1.66799	2.24628	1.28416	1.16422	3.226	1.10107	1.68378	2.80663	1.43406	2.01219	2.2252
	Potri.006G000800	34.429	34.852	34.7065	43.7403	42.9937	45.2745	43.4932	36.5915	20.9099	35.8791	21.3978	34.0681	34.7088	19.4276	35.7087	34.1886	33.6768	36.2878
	Potri.010G039300	23.0743	25.4255	26.3779	28.5742	28.8947	28.7156	24.0572	24.258	22.6777	18.2536	15.9968	15.8898	28.638	25.4451	25.9672	26.7549	28.1503	33.7282
	Potri.006G146100	0	0	0	0	0	0	0	0	0	0	0	0	0	0	0	0	0	0
	Potri.009G023100	18.9022	17.9198	17.671	20.6159	22.7215	22.0037	11.1623	8.69476	9.74093	10.7917	10.5865	11.1218	14.8993	14.8059	14.3643	14.7279	15.0878	14.7541
	Potri.004G021300	51.7508	46.2351	45.1437	21.0353	20.2966	20.7262	25.4312	28.1726	28.8967	32.4467	30.6922	28.4964	15.4693	16.3972	19.6473	26.39	28.7165	27.7989
	Potri.010G174500	0.248735	0.517051	0.93874	1.45327	2.10956	1.85286	2.66247	2.46298	2.47523	2.34304	1.86123	2.78415	2.03018	1.78307	2.71721	0.933263	0.92436	0.361814
	Potri.017G015800	3.45681	4.77236	3.69457	5.3951	5.2796	5.82485	2.41459	2.35408	1.84373	2.91233	3.3323	3.07217	3.54215	4.31663	3.39373	3.16968	3.93363	3.26421
	Potri.002G068600	61.3149	64.5858	62.5023	39.0069	44.2791	40.9573	92.3009	93.7299	89.6526	88.3538	85.6349	82.9956	50.2924	48.1907	47.5412	59.0473	58.3444	55.8589
	Potri.019G036300	0.121521	0.204607	0.130456	0	0.240463	0.188435	0.110943	0.195653	0.171933	0	0.090464	0.263691	0.251168	0.194836	0	0.250291	0.085309	0.044632
	Potri.001G182200	0	0	0	0	0	0	0	0	0	0	0	0	0	0	0	0	0	0
	Potri.004G155400	0	0	0	0	0.153093	0.169824	0	0	0	0	0	0	0	0	0	0	0	0
	Potri.019G118200	0.46564	0.324042	0.252859	0.158134	0.119641	0.451606	0.479734	0.449893	0.679645	0.268186	0.391423	0.354752	0.144643	0	0.049446	0.03815	0.228573	0.532016
	Potri.009G018700	3.26086	4.13464	3.29254	1.27869	1.32475	0.926124	3.06122	3.49477	2.37687	3.21859	3.44517	4.36768	3.14489	3.0267	3.12984	2.5882	2.84016	3.06112
	Potri.015G012100	0	0	0	0	0	0	0	0	0	0	0	0	0	0	0	0	0	0
	Potri.002G122600	29.5195	31.1842	26.4065	22.2257	23.0562	23.1972	28.8341	32.4711	33.4628	23.5023	21.5437	22.6351	20.6696	19.7846	22.3252	35.1094	33.8354	35.0229
	Potri.009G136300	0	0	0.022623	0	0	0.030851	0	0	0	0	0	0	0	0	0	0.013457	0	0
	Potri.013G149100	0	0	0	0.165897	0.106835	0	0	0	0	0	0	0	0	0	0	0	0.103718	0.118037
	Potri.010G053100	1.71838	1.65239	1.5977	2.56569	2.01819	1.79576	1.50308	1.34055	1.531	2.10408	2.00113	1.63438	1.49795	1.4418	1.28779	1.34712	1.2319	1.66372
	Potri.017G099500	0	0	0	0	0	0	0	0	0	0	0	0	0	0	0	0	0	0
	Potri.015G105800	0	0	0	0	0	0	0	0	0	0	0.133641	0	0.053762	0	0	0.221092	0	0.07386
	Potri.014G113900	1.04733	0.888615	0.8937	1.07648	1.20018	0.942071	0.909443	1.03062	1.16201	1.02766	1.71485	1.03868	0.888093	0.741527	1.0497	1.02889	0.921646	0.894792
	Potri.001G402200	0	0	0	0	0	0	0	0	0	0	0	0	0	0	0	0	0	0
	Potri.007G064600	0	0	0	0	0	0	0	0	0	0	0	0	0	0	0	0	0	0
	Potri.002G042000	15.9824	15.4304	14.9047	17.9994	18.15	16.3779	16.2488	13.0635	14.9513	15.0135	15.05	2.13893	15.0445	15.4395	14.6213	16.1965	14.564	16.7586
	Potri.018G066300	4.75865	4.40084	5.25324	7.67293	8.4101	7.78978	3.23834	3.56889	3.13849	2.93734	2.97647	3.18458	5.94649	6.01627	6.28115	5.45943	6.13361	5.49969
	Potri.004G086300	9.9152	9.66882	7.84488	1.99618	2.55922	2.2829	7.60481	7.83665	5.84134	8.47676	9.65583	8.17551	6.18012	6.10875	5.72323	8.08064	9.49974	7.9206
	Potri.009G035000	13.2604	12.6968	12.9657	3.41558	3.0263	2.97266	26.5251	27.2344	29.8391	35.7034	32.881	28.6466	12.7627	13.9276	12.813	11.0631	11.0427	12.0258
	Potri.018G075500	23.7642	27.0134	26.8042	26.9537	29.1935	28.1414	22.2057	24.2462	23.6951	26.8037	24.075	22.1139	27.5161	28.0045	28.1412	23.9926	25.2595	24.4972
	Potri.013G020500	5.93061	5.85446	7.49862	4.48631	4.02533	4.03741	4.79831	5.60379	5.04517	5.76644	5.5115	5.58726	6.19996	6.10545	5.05137	5.80523	6.45047	6.29326
	Potri.008G041900	19.0153	17.8539	20.3934	12.8331	14.5322	13.8317	19.2907	18.6118	19.9376	17.0979	19.6623	19.6372	16.4813	19.1879	16.7167	18.3033	16.4697	16.4028
	Potri.006G221200	3.48216	2.86931	2.66481	2.68957	2.75917	2.81267	2.67112	3.19369	2.81483	2.31288	2.76169	1.1766	3.07648	2.20873	2.62709	2.95756	2.56605	2.54901
	Potri.013G067000	0.442287	0.564319	0.412594	1.56033	2.2565	1.84562	0.831978	0.550253	0.669697	0.606915	0.658376	1.12	0.960226	0.896808	1.17972	1.84553	1.53384	1.93419
	Potri.010G017700	0	0	0	0.044614	0	0	0	0.083207	0	0	0	0.060735	0	0	0	0	0	0
	Potri.004G102600	0.21026	0.42826	0.799386	1.2596	0.870174	1.06222	0.690194	1.41008	0.454611	0.244164	0.699106	0.442514	0.263725	0.174006	0.416127	0.424426	0.248043	0.423188
	Potri.013G060200	17.3332	18.0861	9.61284	18.2372	23.698	10.7693	20.3696	17.6011	10.4252	18.7745	19.9493	10.9218	15.6991	16.8536	18.277	14.8405	13.1708	19.739
	Potri.003G190000	18.5875	18.2757	18.5757	15.4388	15.2525	16.0611	21.2867	19.1662	20.587	19.2485	17.9423	19.88	24.6428	22.9546	23.0509	23.1337	21.2828	21.888
	Potri.003G006700	0	0	0	0	0	0	0	0	0	0	0	0	0	0	0	0	0	0
	Potri.010G159700	11.9094	8.64287	9.35108	9.81506	7.4325	8.30578	7.62188	6.79624	7.05974	7.10643	6.89987	7.28081	9.76765	9.30287	10.4297	10.012	11.1371	10.2205
	Potri.002G140900	0.198271	1.22687	1.0387	0.788881	0.43505	0.160559	0.713339	0.945978	0.32988	0.399252	0.267576	1.18506	0.754197	1.08102	0.310109	0.732962	0.568854	0.660103
	Potri.005G118500	0	0.037934	0	0	0	0	0	0	0	0	0	0	0	0	0	0	0	0
	Potri.005G164900	0.452479	0.323473	0.853668	2.45713	3.21219	2.82246	4.25863	3.1889	5.91561	5.31884	3.81726	4.23804	2.32396	2.96464	2.89485	0.592977	0.809398	0.755235
	Potri.008G217500	0	0	0	0	0	0	0	0	0	0	0	0	0	0	0	0	0	0
	Potri.013G109300	50.7354	50.6051	52.1426	22.705	25.6091	24.3875	28.0816	40.3582	41.0541	51.5385	51.1506	48.1448	30.154	30.7561	28.6035	40.4435	40.3359	42.0454
	Potri.006G221400	0.585457	0.689498	0.71849	0.529264	0.987026	0.83989	0.711066	0.866788	0.606455	0.621485	0.679619	0.521632	1.01883	1.24186	0.71201	0.847821	0.952976	0.630602
	Potri.009G061500	0	0.109874	0.176717	0.806794	0.936903	1.04029	0.737618	0.13691	0.047968	0.341844	0.134156	0.499478	0.560154	0.818606	0.337838	0.319511	0.16249	0.294524
	Potri.002G004800	12.4017	11.6868	10.5997	12.3313	10.1452	9.78289	11.8635	11.0392	11.74	10.7847	12.2638	12.3698	12.087	9.77774	10.9727	11.6418	11.8883	11.3143
	Potri.017G037000	13.9003	11.6058	13.7757	15.5679	17.7011	18.2038	14.416	13.6239	11.013	12.7592	11.5321	11.6649	11.0855	10.3121	12.1136	9.57392	9.67318	10.219
	Potri.014G089300	13.6607	14.0322	13.0605	13.4179	12.437	14.5946	9.74762	8.94348	9.84551	11.8231	11.6079	12.4738	12.5678	13.2053	14.2983	12.3052	12.2063	12.156
	Potri.005G163800	0	0	0	0	0	0	0	0	0	0	0	0	0	0	0	0	0	0
	Potri.012G055600	8.81762	9.16224	9.56885	6.34195	5.6618	7.39912	7.74806	7.37388	6.85463	8.68092	6.28754	8.60375	7.9001	10.7755	8.54983	16.6236	17.9543	18.9169
	Potri.007G122800	13.5474	12.9263	11.6582	13.3319	12.5198	15.0925	10.1658	11.5919	12.7411	11.2329	12.7824	11.435	12.604	14.5982	13.7861	12.1623	13.0608	11.747
	Potri.005G208600	4.64956	4.93953	4.67398	5.65121	5.85547	6.47386	4.0928	3.55383	3.5267	3.68139	4.21727	3.99583	4.5494	4.37354	3.92982	3.89651	4.64761	3.79086
	Potri.003G100100	12.8562	10.8801	10.9954	7.61051	6.79824	9.22129	7.3871	7.09991	7.4398	7.10697	7.99035	6.37925	11.3534	9.80603	11.4905	12.9992	11.7644	11.6721
	Potri.003G168900	6.53063	7.70971	6.35589	7.141	5.42434	6.87619	6.48451	7.16165	6.64708	5.57711	6.78161	5.53258	7.68813	7.35506	8.01951	7.21726	6.00165	6.4787
	Potri.001G292700	29.2214	30.5464	26.6757	24.5263	26.3193	30.061	29.8469	26.044	30.154	30.9504	25.9105	27.8828	29.3921	29.5621	31.3495	24.3079	28.9467	27.4999
	Potri.003G104500	0.264656	0.184162	0.325794	0.352282	0.578393	0.548927	0.078201	0.125253	0.545461	0	0.349049	0.153924	0.363316	0.476103	0.286479	0.623677	0.475281	0.875197
	Potri.010G064000	0	0	0	0.047854	0.082323	0.198095	0.201744	0.259737	0.08316	0	0.116471	0	0	0	0	0	0	0.210781
	Potri.010G004300	7.76748	8.08047	7.97511	8.2853	6.48408	7.26264	5.64031	5.76417	6.50027	5.95982	6.73195	6.01814	6.85714	5.89715	6.4764	6.83282	6.08532	6.7141
	Potri.008G216600	8.14141	8.4704	9.02707	7.07857	7.10597	7.05403	5.1769	5.78269	6.27932	5.50257	5.88682	6.18203	6.99559	7.39336	7.42961	7.86326	8.08823	7.68551
	Potri.009G075100	0	0	0	0	0	0	0	0	0	0	0	0	0	0	0	0	0	0
	Potri.010G123000	0.30944	0.374804	0.286463	0.339809	0.43325	0.320829	0.589937	0.621307	0.834977	0	0.08448	0.05245	0.091746	0.15334	0.234042	0.296975	0.092697	0.295427
	Potri.003G147300	0.033308	0	0.09318	0	0.035875	0.047087	0.090121	0	0.109254	0	0	0	0	0.03128	0.029308	0.100729	0.191105	0.050354
	Potri.T006900	0	0	0	0	0	0	0	0	0	0	0	0	0	0	0	0	0	0
	Potri.006G101000	6.06153	6.04715	6.46413	0.78278	1.10679	1.12294	0.87971	1.4303	0.934604	3.27774	2.97057	1.91317	2.82301	2.76395	2.8837	7.85601	6.00687	5.60849
	Potri.012G038300	16.4852	9.45454	9.73145	12.0798	5.83538	10.9643	2.69363	3.89746	5.43956	2.62613	4.94168	3.00116	8.03661	7.89586	8.00715	7.2402	12.1686	12.7509
	Potri.005G228000	0	0	0	0	0	0	0	0	0.070148	0	0	0.321559	0	0	0	0	0	0
	Potri.016G077900	0	0.262176	0.315348	0.138486	0.388511	0	0	0.157377	0	0.24269	0.114419	0	0.25332	0.20711	0.20066	0	0	0.279628
	Potri.015G033600	0.8291	1.17936	0.701233	2.67785	2.09245	2.05908	4.87639	4.41782	3.58085	3.50737	2.73218	2.73557	1.99926	1.40971	1.96335	1.05109	1.19166	1.49526
	Potri.015G046200	9.42525	7.5759	10.0787	3.94346	4.69402	5.65298	4.56347	4.46588	5.12023	3.76266	3.40953	3.71893	6.58683	6.49242	5.68933	19.234	20.2822	16.4692
	Potri.007G136900	4.45257	5.43561	6.27296	3.03301	2.55656	3.67393	1.36831	2.23343	2.13627	3.89814	3.61551	2.83387	2.45955	3.33028	3.09904	2.75088	1.10333	4.04398
	Potri.001G436000	0	0	0	0	0	0	0	0	0	0	0	0	0	0	0	0	0	0
	Potri.002G257800	14.4994	12.778	13.5915	10.3251	11.7261	9.71846	14.2838	14.5683	13.5605	15.7156	15.3615	15.7229	14.9475	14.7057	10.5224	12.5802	10.4907	9.595
	Potri.002G073500	0.188297	1.17922	0.866312	0.818269	0.957879	0.902674	1.6162	1.09726	1.38784	2.11053	1.57279	1.61145	1.75257	1.05714	1.1555	0.896497	0.994874	0.601097
	Potri.006G140200	0	0	0	0	0	0	0	0	0	0	0	0	0	0	0	0	0	0
	Potri.001G139900	0.327306	0.317046	0.472705	0.297141	0.752475	0.764933	0.966856	0.358427	0.973187	0.756812	0.86172	0.847629	0.369549	0.101945	0.393483	0.677617	0.82996	0.852492
	Potri.003G083800	10.193	12.7774	10.7531	8.91018	8.21681	8.71531	11.245	9.95349	10.0813	9.26293	12.5319	10.0189	12.6938	11.8783	11.4744	10.0381	12.7322	11.2981
	Potri.013G025200	12.8874	13.4593	14.0927	11.7508	11.5927	10.9428	10.52	10.9386	12.085	12.2252	11.5082	13.1866	10.3545	10.6065	11.3416	10.9895	11.3768	12.0736
	Potri.002G243300	5.39336	5.132	5.41518	4.26628	4.19449	5.38372	5.00606	4.02818	4.93962	4.50317	5.26464	5.33568	5.20833	6.21994	6.12743	4.37175	3.83547	5.28392
	Potri.013G048000	5.88251	5.36906	5.68813	4.41652	2.89988	4.12437	6.32091	5.90917	6.34722	6.83717	7.1472	7.30059	4.07958	4.2969	4.84918	4.15696	5.73813	5.31229
	Potri.010G021200	0	0	0	0	0	0	0	0	0	0	0	0	0	0	0	0	0	0
	Potri.003G123800	0.067291	0.819799	0.176938	0.36825	0.298183	0.316399	0.397897	0.336054	0.255342	0.054419	0.384141	0.14352	0.095733	0.23253	0.198787	0.229005	0.207779	0
	Potri.005G192000	12.1084	11.9296	13.2009	9.68604	10.644	9.49482	11.1998	11.9195	12.7897	15.7103	14.6353	12.2771	9.9444	11.6467	9.38828	10.8612	10.8291	10.8601
	Potri.010G167500	1.1719	1.20676	1.27623	3.17638	2.97899	2.92999	1.44875	1.13507	1.59257	1.18382	1.60137	1.80181	2.34531	3.08563	2.96341	1.14375	1.02758	1.16002
	Potri.015G067700	0	0	0.036291	0	0	0	0	0	0	0	0	0	0	0	0	0	0	0
	Potri.001G243600	1.98638	2.26453	1.47074	0.934549	1.01982	0.765692	9.06061	9.71947	10.9958	12.0031	8.66055	11.1341	4.84302	4.03226	5.42702	2.16938	1.86589	2.95941
	Potri.005G252500	5.41794	5.23238	5.66488	3.09158	3.7632	3.01516	4.16511	4.7948	4.91691	6.71931	2.55194	5.38936	2.18185	5.78755	4.89112	5.50694	5.24464	5.78471
	Potri.001G137600	1.07872	1.04537	1.46942	2.50605	3.32283	1.98903	1.70694	1.85926	1.40706	0.968694	1.49489	0.986461	1.28233	1.76154	1.47104	1.42399	1.31561	1.30724
	Potri.015G143500	3.25195	2.51093	3.06659	1.54786	1.45207	1.62259	1.82693	2.08784	1.88744	2.35331	2.0813	2.04337	2.15494	3.06023	2.3391	2.62793	2.11525	2.45464
	Potri.015G093600	9.81666	11.1067	11.5775	2.34414	1.92843	2.31565	6.23741	7.76929	6.48257	9.53369	10.6674	10.3212	9.67737	11.23	10.3321	9.48644	9.74099	8.96805
	Potri.015G041500	6.99461	6.16838	7.05269	3.90241	4.61587	4.59262	4.20495	4.52642	4.51336	4.78975	4.80018	5.41207	5.0474	5.75218	5.34258	5.2478	6.01527	5.3221
	Potri.006G054400	0	0	0	0	0	0	0	0	0	0	0	0	0	0	0	0	0	0
	Potri.005G186400	0.34717	0.668537	0.417027	1.91616	1.77907	0.878547	2.10371	1.71984	1.45284	1.87341	2.08617	1.01724	1.23846	1.11437	1.39187	0.610833	0.998467	1.09218
	Potri.008G176600	0	0	0	0	0	0	0	0	0	0	0	0	0	0	0	0	0	0
	Potri.001G339400	0	0	0	0	0	0	0	0	0	0	0	0	0	0	0	0	0	0
	Potri.009G114900	8.96187	7.91725	8.51871	8.84869	8.93561	9.85617	6.40509	6.68279	8.08212	7.92366	7.96181	6.21007	7.85862	9.16873	8.23779	7.6888	6.87975	7.43771
	Potri.008G191800	17.7279	17.2783	16.3408	23.4114	23.6711	25.0727	14.9629	14.4058	13.9727	13.6154	13	12.7354	20.7927	20.2029	21.5293	19.6933	18.3518	18.8285
	Potri.004G115600	0	0	0	0	0	0	0	0	0	0	0	0	0	0	0	0	0	0
	Potri.003G189700	1.70593	2.29203	1.69836	0.622915	1.35814	1.08822	0.986913	1.69592	0.956305	1.58684	1.503	1.55132	1.55185	1.85404	1.95754	2.58305	2.69989	1.92952
	Potri.004G118000	0	0	0	0	0	0	0	0	0	0	0	0	0	0	0	0	0	0
	Potri.003G044300	0.680254	0.509248	0.32821	0.522483	0.604344	0.705032	0.372272	0.166645	0.597758	0.342915	0.553613	0.474511	0.646289	0.396633	0.606663	0.555625	0.292156	0.505479
	Potri.006G147400	10.5889	10.748	10.09	8.13091	8.819	10.0498	7.67803	7.09523	8.70798	9.79888	9.66226	10.0666	8.86497	9.23156	9.42788	9.5525	10.8659	11.9271
	Potri.002G172100	11.4599	10.5726	11.4001	12.6479	12.1187	12.5549	14.1915	14.8509	13.0456	10.4638	9.68524	11.8432	13.7926	13.8206	14.2758	13.6404	13.2466	13.2932
	Potri.011G147400	17.9821	17.726	22.9968	19.6887	20.1934	18.323	21.2492	21.5116	17.1467	21.2239	19.6419	20.4419	17.9886	17.4417	17.1697	20.2372	21.3801	21.138
	Potri.005G063200	0.804502	0.887307	1.11877	1.14498	1.26127	0.747183	2.0074	2.73171	1.6804	2.6031	2.53024	2.35866	1.71135	0.908181	1.71211	1.34444	1.83367	1.09638
	Potri.003G118600	8.93451	8.72976	8.57387	8.00014	7.73205	7.34321	11.3016	10.2469	8.35105	11.4111	9.19805	10.4051	9.54818	10.2083	9.10647	9.39334	8.78011	8.69266
	Potri.012G140500	0.056424	0	0	0.183285	0.090954	0.212172	0	0	0.046308	0	0	0	0	0.041084	0.100978	0	0	0.283763
	Potri.016G001100	40.9711	14.1934	43.9784	48.7201	50.7336	18.0553	14.8483	38.5035	13.8563	14.1386	38.8536	15.7972	15.978	15.242	13.4485	14.4632	39.3828	38.1699
	Potri.015G077700	0.368362	0.271721	0.082405	0.042412	0.050898	0	0.115939	0.108203	0.038267	0	0.216034	0	0.044298	0.116653	0	0.255042	0.208412	0.465635
	Potri.001G224500	2.11351	1.63169	1.60163	0.967323	1.16875	1.04268	1.25742	1.38025	1.52401	2.68626	2.31124	1.89533	2.25286	2.42649	1.76179	2.06859	1.80819	1.78074
	Potri.014G122700	0.115449	0.073742	0.135901	0.284727	0.183862	0.25431	0.051476	0.116531	0.332051	0.080051	0.112218	0	0.18142	0.235662	0.167828	0.073982	0.222541	0.212314
	Potri.013G095000	0	0	0	0	0	0	0	0	0	0	0	0	0	0	0	0	0	0
	Potri.011G116400	18.9991	19.3996	19.2611	8.09744	8.81395	7.37926	17.2141	17.7685	17.0146	16.0376	12.684	15.6398	19.0964	18.7105	18.9533	17.0705	16.3997	18.4848
	Potri.001G179800	26.8649	26.6308	24.654	17.7979	18.1016	22.8155	27.0362	29.1611	31.8081	31.3702	34.6753	32.9625	28.3303	30.2	26.4574	25.4611	25.1409	24.6678
	Potri.012G140700	1.29358	0.794795	0.730623	0.287129	0.697329	0.664382	0.899694	0.64643	1.05724	0.907834	0.86257	0.473365	0.45908	0.521101	0.275544	0.676939	0.60671	0.451126
	Potri.015G137800	7.63232	8.56375	8.67289	5.86759	5.90624	6.98974	7.66558	6.75402	5.79106	7.11272	7.30547	7.39844	6.83613	6.71251	6.63192	7.51911	7.31436	6.94051
	Potri.015G143400	0.067983	0	0.097697	0.091627	0.337019	0.329795	0.382158	0.20397	0.161172	0.066171	0	0.099067	0.127881	0.446812	0.14444	0.090727	0	0
	Potri.001G118800	4.00889	5.79511	4.88957	4.39698	4.73443	4.33392	7.88294	7.2945	6.32871	6.10955	6.74534	6.66635	4.8473	2.96718	4.36742	3.48769	4.13754	4.05848
	Potri.014G083900	2.87725	2.28074	2.86014	3.6648	3.69039	4.20177	2.3714	2.88356	2.63944	0.615384	1.36936	1.89509	2.64965	2.79283	3.10556	1.85615	2.89521	1.95814
	Potri.016G047900	6.7354	6.54965	5.81918	3.37791	3.13463	3.6091	3.79506	3.19656	4.00179	8.07717	7.40395	8.04909	3.09923	4.61579	5.00201	5.22592	5.03563	4.03973
	Potri.010G240800	10.0753	8.69265	8.402	5.72903	4.78087	4.14748	7.34709	8.03331	8.49358	7.00356	5.61425	5.55187	8.06164	5.34846	7.37111	10.7441	9.58232	9.62162
	Potri.019G018400	26.2229	25.9827	23.7533	22.2544	20.4963	20.7923	29.2465	27.5757	29.4381	26.7944	29.725	30.2799	27.8872	28.6623	28.5741	26.4982	24.6737	25.0574
	Potri.006G123400	0.62464	0.60373	0.567003	1.94145	2.06683	1.59183	1.23223	1.94115	2.04554	1.48014	1.15973	1.4132	1.75931	0.875456	1.02246	0.992222	1.24104	1.55318
	Potri.013G056500	0	0.051465	0	0.557685	0.617586	0.695304	0.063363	0.028122	0.129007	0	0	0.065413	0.437075	0.335974	0.061173	0.048012	0.152944	0
	Potri.005G144300	0	0	0	0	0	0	0	0	0	0	0	0	0	0	0	0	0	0
	Potri.006G188000	4.29756	4.11431	3.38427	3.06854	3.38537	3.24373	4.62268	4.55289	5.59195	4.09868	4.74634	5.00812	3.79837	4.16848	3.54365	3.41778	4.34829	3.52168
	Potri.018G067600	0	0	0	0	0	0	0	0	0	0	0	0	0	0	0	0	0	0
	Potri.006G125400	8.95618	10.1539	9.64646	7.46735	7.68125	6.9986	6.8963	6.97974	7.27258	6.2415	7.45536	7.38795	8.80102	7.90133	8.27674	8.53121	7.80137	7.20285
	Potri.001G300200	0	0.045057	0	0	0.219316	0.234089	0.089069	0	0.104449	0.0548	0	0.054562	0.047241	0.141212	0	0.166807	0.049199	0.230876
	Potri.001G235500	156.958	156.278	153.249	114.248	107.927	122.435	178.321	178.22	173.928	186.293	168.766	164.112	170.706	141.97	161.395	158.011	162.455	155.032
	Potri.014G004900	16.1949	17.0031	17.6248	15.6961	16.0188	17.5582	14.3607	16.6546	17.3026	15.7887	17.4891	17.1097	14.778	15.6381	15.0184	17.0351	16.2674	14.1266
	Potri.010G235000	2.2669	1.39001	1.36915	2.0481	1.91578	2.51957	2.43243	3.3153	2.46615	2.22982	1.93457	1.67689	1.27422	1.69681	1.79424	2.13575	2.34264	2.33211
	Potri.001G238000	0	0	0	0	0	0	0	0	0	0	0	0	0	0	0	0	0	0
	Potri.001G269100	0	0	0	0	0	0	0	0	0	0	0	0	0	0	0	0	0	0
	Potri.006G241700	0.938438	1.05856	1.13621	3.63437	4.29612	4.89052	2.65378	2.17488	3.16855	2.29653	3.25044	3.80478	1.99257	2.73043	2.16729	1.59687	1.74992	1.31016
	Potri.002G200700	0	0	0	0	0	0	0	0	0	0	0	0	0	0	0	0	0	0
	Potri.011G094000	0	0	0	0	0	0	0	0	0	0	0	0	0	0	0	0	0	0
	Potri.001G195700	0	0	0	0	0	0	0	0	0	0	0	0	0	0	0	0	0	0
	Potri.002G096800	0.551514	0.467162	0.230404	1.51843	1.08497	1.38907	1.90726	1.10019	1.9371	1.85209	1.98056	1.50757	1.52983	0.645563	1.03444	0.636106	0.719561	0.398557
	Potri.013G056400	0.126936	0.049413	0	0	0.164362	0.242686	0.137724	0.10197	0.149479	0.056419	0	0.064946	0.363569	0.418842	0.255995	0.070682	0.224319	0
	Potri.002G191800	0.629583	0.483272	0.692221	0.187234	0.113674	0.100136	0.095187	0	0.158794	0.252032	0	0.056561	0.254192	0.642338	0.735457	3.60055	4.86162	4.10677
	Potri.019G020900	15.6221	17.7051	17.7291	9.61338	10.1865	11.9417	7.69684	9.43276	8.37121	11.9693	12.099	8.09211	12.1865	12.9684	12.9161	11.0646	15.1115	13.1569
	Potri.007G005000	6.70431	6.66439	7.09511	4.2035	4.31022	4.92389	5.33925	4.58665	4.92383	5.89278	7.50339	5.91246	8.31299	7.41867	7.28286	7.47724	6.33581	6.37722
	Potri.001G408700	4.04744	4.49581	3.4427	3.53854	3.29292	4.25513	3.9745	4.35036	4.13776	4.38133	4.06075	5.08775	3.13372	3.58689	3.93112	4.10495	5.36738	4.89373
	Potri.001G267300	0.672411	0.160758	0.523485	3.74775	3.05419	3.3847	1.9964	1.63496	2.33469	0.965745	1.07069	2.17107	1.60434	0.732541	1.14812	0.673317	0.925306	1.25333
	Potri.003G063700	22.1406	21.0307	21.8474	14.044	11.3098	12.9478	19.6228	21.8183	21.8138	23.9901	19.9724	23.7581	19.8921	19.2589	21.5505	18.7011	19.5443	19.9046
	Potri.014G106800	78.0245	78.7597	82.5983	213.04	133.278	215.6	2.91125	2.61999	2.59041	1.02025	1.39262	1.20842	19.4883	21.8701	20.4309	45.9557	49.8333	49.5091
	Potri.014G002100	0	0	0	0	0	0	0	0	0	0	0	0	0	0	0	0	0	0
	Potri.002G023800	4.96164	4.68334	4.63387	4.33375	5.23634	4.83746	4.89462	5.47022	5.73366	5.01687	4.46825	5.09784	5.17752	4.6709	5.83228	2.26667	2.16902	5.2599
	Potri.017G125700	0	0	0	0.625711	0.636771	0.827734	0	0	0	0	0	0	0	0	0	0	0	0
	Potri.013G039100	4.66054	4.59951	5.54095	4.90454	4.57401	4.20749	4.57479	5.13696	4.59455	5.08831	5.07304	4.89474	5.09711	4.80816	5.71844	3.61932	4.25331	3.86521
	Potri.014G077200	2.67551	3.23586	3.63354	2.20895	2.41575	1.92019	1.54334	1.69973	1.94403	2.47185	2.00911	2.44155	2.7129	2.82867	2.31709	2.60613	2.44748	3.07476
	Potri.003G056000	17.8787	17.1271	16.2302	16.8764	15.6776	16.8713	16.6206	15.7272	15.7572	15.9524	16.5712	15.0043	15.1125	15.3035	16.2307	16.524	15.6262	17.1409
	Potri.009G044100	0	0	0	0	0	0	0	0	0	0	0	0	0	0	0	0	0	0
	Potri.009G106600	21.6951	25.6512	18.8727	21.6231	26.4191	22.7577	27.1531	27.0637	30.1831	22.8444	20.5928	23.4164	25.6987	27.6381	29.108	27.9546	26.4447	18.0543
	Potri.001G347200	0.04579	0	0	0	0	0	0	0	0	0	0	0	0	0	0	0	0	0.045072
	Potri.T011400	0.190214	0.490053	0.579101	2.23251	2.15427	2.04691	0.943531	0.855694	1.407	1.43608	1.53407	0.402506	1.35753	1.29346	1.20832	0.821823	1.27264	0.885642
	Potri.015G069000	79.175	85.5527	78.379	70.7953	69.0553	70.2872	76.5111	77.5215	73.8417	82.2284	81.4002	78.0162	75.8413	72.9257	74.0478	78.3812	80.1211	80.5261
	Potri.013G067500	6.24123	7.23291	6.8044	11.2509	10.3027	9.30858	7.74808	5.70302	6.1956	7.03494	6.82293	6.98081	5.91794	7.06731	5.86242	5.73291	6.5114	5.8918
	Potri.009G087000	14.215	14.8694	12.5201	11.2554	12.703	9.78217	13.1814	11.7158	12.689	12.2039	11.2573	10.1393	17.0821	14.1874	15.1214	14.7048	12.406	15.4087
	Potri.002G204500	0	0	0	0	0	0	0	0	0	0	0	0	0	0	0	0	0	0
	Potri.002G157600	2.461	2.16201	1.97103	1.41649	0.855291	0.808999	1.11146	2.04334	1.42286	1.92462	1.37765	0.95063	1.70003	2.20023	1.65196	1.0704	1.1173	1.02205
	Potri.010G114000	2.6646	3.03353	3.2056	3.63162	4.61378	4.25975	1.77073	2.14248	2.28124	1.97644	1.97362	1.81819	4.85261	5.2087	4.36381	1.95692	2.05013	2.51194
	Potri.004G144800	17.1108	15.5092	14.6701	11.2515	12.1706	12.0408	20.2441	19.2385	18.5064	21.0283	19.6257	19.5062	15.775	16.1877	17.151	17.8732	18.5595	18.4942
	Potri.010G220000	11.3549	10.7127	7.25126	4.69558	4.76258	4.01917	6.14162	10.2475	10.1447	9.8714	12.0701	11.8063	5.669	9.96854	10.1744	9.88675	9.64064	5.48328
	Potri.008G196900	0.234492	0.069248	0.21889	0.279274	0.200189	0.10808	0.382204	0.311067	0.129517	0.402813	0.247267	0.248913	0.465576	0.377476	0.255765	0.506483	0.222717	0.41003
NAC	Potri.003G190800	81.076	85.2443	86.3655	91.3456	86.5601	85.3796	96.0615	94.811	88.6784	92.3238	100.263	91.7001	116.068	113.359	113.927	89.433	87.4237	94.4235
	Potri.012G006700	33.3007	33.9838	32.8086	22.0207	24.4776	24.0146	24.9778	24.2295	30.617	30.1731	32.3717	34.8202	38.4513	33.3313	32.9744	37.826	35.1597	36.3776
	Potri.001G034400	68.2732	66.0408	69.6881	68.8459	63.2534	69.2582	65.6972	70.6844	63.4335	63.8941	70.8847	70.2791	84.5604	80.7946	84.0197	72.375	69.5894	73.1358
	Potri.015G029800	33.2391	40.5469	30.8129	34.2062	44.7135	38.7735	33.1652	35.0353	29.714	29.8093	29.0967	30.8724	34.867	31.3007	31.8614	40.0666	32.6906	46.7433
	Potri.015G003300	58.1094	56.8863	55.7944	85.3992	84.5484	84.619	60.1003	58.2691	55.2702	52.2167	51.6103	53.7223	65.6095	64.121	66.3898	63.0015	59.1945	67.3112
	Potri.006G032000	39.3113	36.1929	34.4749	46.3071	42.4759	48.8312	33.2062	31.203	33.4422	35.5504	34.8345	32.4633	38.622	34.5504	35.3536	33.5103	35.2409	33.7887
	Potri.017G141100	196.386	120.052	192.152	110.88	176.1	193.918	197.097	192.565	124.685	134.096	223.316	134.42	122.289	195.745	126.657	184.013	187.288	193.018
	Potri.004G078300	52.2861	56.5556	51.5324	48.6785	40.5454	49.947	48.84	50.7583	50.279	51.8933	53.5875	51.2924	66.3051	61.4805	60.8123	48.4994	51.4935	56.6102
	Potri.012G037900	40.4501	30.9712	35.4811	26.577	29.3021	27.4263	30.8106	37.9269	40.3602	46.4015	31.4741	42.2513	59.3138	48.9363	49.8547	33.6743	36.1673	40.5552
PAL	Potri.006G126800	288.77	287.81	277.84	645.29	645.98	630.51	900.27	878.39	882.82	391.04	398.56	405.23	425.79	442.18	435.25	256.61	254.39	254.7
	Potri.008G038200	30.7	29.07	30.82	58.24	60.5	52.86	32.5	33.42	36.52	42.16	40.44	36.8	32.46	27.7	30.3	32.94	38.71	31.93
	Potri.010G224100	3.83	4.44	3.79	14.75	16.09	15.24	9.75	9.33	9.53	9.68	11.08	8.87	7.18	5.67	5.76	6.93	7.42	6.48
	Potri.010G224200	1.09	0.94	1.17	3.03	2.91	3.43	1.97	2.11	1.98	2.08	2.03	2.2	1.44	1.06	1.41	1.29	1.58	1.37
	Potri.010G224400	0	0	0.06	0.04	0.11	0.12	0	0	0.07	0	0	0	0	0.02	0	0.03	0	0
	Potri.016G091100	314.51	306.58	309.08	207.77	215.11	211.23	367.2	372.78	373.5	214.43	224.96	216.96	311.14	314.25	316.54	224.86	213.52	221.37
POD	Potri.001G011000	0.88	1.5	1.02	3.84	4.57	4.06	3.55	2.13	2.19	1.94	1.63	1.71	2.09	1.75	2.05	1.76	2.56	2.24
	Potri.001G011200	0.7	0.64	0.45	2.23	2.54	2.7	2.08	1.79	1.49	0.87	0.76	1.17	1.3	1.22	1.18	0.74	1.45	1.39
	Potri.001G011300	0.72	0.21	0.62	2.71	2.86	3.06	1.38	1.51	1.94	0.78	0.51	0.8	1.36	1.01	1.38	0.94	0.85	0.99
	Potri.001G011500	0	0.04	0	0	0	0	0	0	0	0	0	0	0	0	0	0	0	0
	Potri.001G013000	0.05	0	0	0.04	0.19	0.32	0.18	0.06	0.04	0.17	0	0	0.1	0.21	0.05	0.05	0	0.13
	Potri.001G070900	0.59	0.79	1.12	0.82	0.87	0.5	0.69	0.41	0.44	0.75	0.45	0.41	0.66	0.53	1.16	1.57	1.23	1.22
	Potri.001G098300	0.75	0.49	1.04	2.53	2.71	2.75	1.54	1.44	1.3	1.3	0.87	0.72	1.42	1.75	1.66	0.78	0.95	0.64
	Potri.001G145800	8.91	10.04	8.84	6.4	5.84	5.84	9.1	6.72	8.72	14.52	12.6	12.06	9.68	10.81	9.71	7.81	9.56	7.94
	Potri.001G182400	0.14	0.16	0.07	0.24	0.05	0.47	0.28	0.12	0.14	0.07	0.04	0.22	0.06	0	0.12	0	0	0.07
	Potri.001G218500	0.29	0.34	0.36	0	0.02	0.03	0.06	0	0	0.17	0.11	0.14	0.33	0.03	0.06	0.17	0.19	0.16
	Potri.001G351000	10.84	10.85	12.07	24.81	24.14	23.18	9.34	9.35	8.21	9.42	7.93	7.4	14.21	15.93	16.15	13.07	14.08	13.27
	Potri.002G018000	0.41	0.63	0.24	7.11	7.79	5.88	2.24	2.91	1	1.34	1.22	1.22	0.92	1.63	0.86	0.3	0.4	0.86
	Potri.002G031200	6.8	6.48	6.35	1.12	1.19	1.58	6.86	6.42	6.28	7.69	8.86	7.89	5.83	6.09	5.3	6.02	5.91	5.89
	Potri.002G065300	3.58	3.37	4.37	4.9	4.56	5.86	4.52	4.14	3.55	7.23	7.83	4.99	3.91	3.32	3.93	4.34	4.62	4.14
	Potri.003G126100	187.21	177.97	165.4	122.35	121.78	123.9	194.6	195.5	200.63	247.61	244.89	237.35	138.31	128.27	135.83	144.24	153.78	152.72
	Potri.003G133300	2.01	1.48	1.67	3.47	3.74	3.67	1.86	2.58	2	1.38	2.61	1.76	2.27	2.8	2.38	2.55	2.24	2.31
	Potri.003G156100	0	0	0	0	0.03	0.05	0.05	0.06	0	0	0	0.06	0.1	0.05	0.02	0.04	0	0
	Potri.003G214700	0.99	0.76	1.54	1.98	2.88	2.87	0.99	1	2.13	0.72	1.54	1.11	1.16	0.49	0.78	1.01	0.98	0.92
	Potri.003G214800	4.21	4.98	4.67	7.26	9.52	8.95	6.17	6.67	6.3	2.29	3.03	2.71	5.51	3.76	4.04	3.94	4.03	3.44
	Potri.003G214900	1.22	0.52	0.85	0.36	0.63	0.75	1.01	0.94	0.82	1.02	0.64	0.47	0.71	0.38	0.59	0.59	0.7	1.03
	Potri.004G015300	1132.78	1145.19	1142.19	2988.8	2982.62	2978.18	2252.8	2269.59	2278.91	1626.8	1700.95	1673.58	1201.5	1196.25	1227.7	1088.37	1086.14	1077.53
	Potri.004G052100	0.48	0.81	0.95	1.02	1.13	0.89	0.51	0.91	0.54	0.44	0.21	0.37	1.33	0.85	0.91	0.28	0.29	0.48
	Potri.004G078100	111.7	103.91	109.41	47.53	47.53	51.36	139.69	133.47	146.37	100.37	101.87	103.71	131.75	120.35	126.08	106.12	107.66	107.58
	Potri.004G144600	0.16	0.46	0.14	1.14	1.25	1.03	1.97	1.6	2.96	1.54	2.07	2.02	1.15	0.42	1.05	0.6	0.33	0.23
	Potri.005G072800	14.76	16.49	14.42	50.6	50.86	51.86	39.02	42.61	38.34	34.32	35.23	32.64	33.69	27.84	29.49	21.01	23.03	19.36
	Potri.005G108900	8.74	8.02	7.63	69.36	66.1	70.53	32.66	31.57	28.34	17.89	16.98	15.33	12.91	12.93	13.55	8.16	9.04	9.17
	Potri.005G112200	3.95	3.89	4.2	5.17	5.55	6.57	3.96	3.57	4.04	2.59	4.19	3.45	2.05	2.68	1.5	3.12	2.83	2.62
	Potri.005G118700	3.98	3.86	5.21	18.13	16.83	16.15	6.46	9.47	7	5.22	4.27	5.45	6.72	6.73	6.77	17.88	18.42	18.04
	Potri.005G135300	2.26	1.72	2.45	1.27	1.31	1.61	1.67	0.92	1.44	0.96	1.55	1.66	2.05	1.46	1.7	6.8	5.63	4.39
	Potri.006G025900	7.68	8.1	9.9	17.44	16.11	16.9	8.4	9.13	8.63	9.14	8.5	9.13	9.41	9.24	8.9	6.51	6.99	6.87
	Potri.006G063700	37.45	38.18	38.29	15.42	14.13	15.26	28.99	27.82	29.73	29.92	29.07	30.47	21.77	23.28	23.63	32.08	33.65	33.56
	Potri.006G089000	0.19	0.51	0.43	0.3	0.25	0.3	0.35	0.39	0.51	0.72	0.66	0.51	1.08	0.62	0.68	0.94	0.42	0.72
	Potri.006G129900	5.16	4.43	5.74	3.49	4.31	4.33	2.86	1.78	2.47	2.27	1.6	1.88	3.05	4.73	3.47	13.61	13.72	14.34
	Potri.006G132200	10.24	12.13	10.82	8.66	6.86	8.72	9.92	12.51	10.96	8.69	9.41	10.95	11.55	9.86	10.48	12.67	11.17	11.83
	Potri.006G137300	0.32	0.14	0.12	3.29	2.95	2.92	1.4	1.08	1.31	0.46	0.54	0.7	0.66	0.54	0.56	0.31	0.17	0.32
	Potri.006G254500	11.98	13.11	10.83	5.76	4.91	5.49	7.77	7.67	7.73	13.33	10.72	13	10.73	11.3	11.16	12.03	10.38	11.03
	Potri.006G267400	1.92	1.44	1.63	1.11	1.02	1.07	0.45	0.3	1.01	1.25	0.68	0.28	1.09	0.59	0.59	1	0.8	0.38
	Potri.007G019300	2.1	2.58	1.8	29.55	32.32	31.53	17.93	14.67	16.05	4.53	3.42	3.41	4.96	4.78	5.3	3.61	2.72	2.33
	Potri.007G053400	1.95	2.36	1.62	0.92	0.96	0.63	1.06	1.51	1.18	0.97	1.02	0.9	1.56	1.73	1.3	2.06	2.53	2.95
	Potri.007G074700	0.43	0.66	0.48	1.36	1.33	1.24	0.84	0.73	0.94	0.07	0.57	1.63	0.49	0.46	0.5	1.25	0.18	0.12
	Potri.007G122100	0.47	1.16	0.86	7.95	7.74	7.73	1.75	1.56	1.76	1.52	1.81	1.53	2.71	2.94	2.48	1.32	1.3	1.05
	Potri.007G132800	0.24	0.33	0.34	0.11	0.15	0.28	0.81	0.69	0.88	0.96	1.15	1.11	0.65	0.55	0.36	0.38	0.29	0.45
	Potri.008G022700	0.03	0	0.06	0.02	0.15	0.09	0.3	0.42	0.18	0.06	0.06	0.21	0.1	0.13	0.15	0.32	0.4	0.5
	Potri.008G099900	0	0.23	0.02	0.88	1.53	0.63	0.19	0.1	0	0	0.14	0.03	0.61	0.3	0.32	0.06	0.46	0.03
	Potri.008G106400	0	0.03	0	0.1	0.02	0.12	0	0.02	0	0	0.03	0	0	0	0.03	0.05	0	0.07
	Potri.008G110600	0.2	0	0.06	0.3	0.48	0.31	0.21	0.38	0.14	0.13	0.13	0.06	0.11	0.08	0.03	0.08	0	0.06
	Potri.010G036100	1.73	2.36	2.71	0.41	0.59	0.99	5.92	5.47	4.53	4.87	7.25	6.41	3.33	2.4	3.53	2.47	1.78	1.52
	Potri.010G134500	0.63	0.29	1.27	12.23	12.86	13.61	5.09	8.66	5.58	6.1	3.96	6.32	3.88	5.33	5.02	0.77	1.56	1.53
	Potri.010G175100	0	0.05	0	0	0	0	0	0	0.05	0	0	0	0.03	0	0	0.15	0.05	0.11
	Potri.011G027300	0	0	0	0	0	0	0	0	0	0	0	0	0	0	0	0	0	0
	Potri.011G062300	0.55	0.43	0.88	1.72	1.8	1.82	1.25	2.11	1.2	0.56	1.41	1.15	1.01	0.8	1	1.02	1.03	1.34
	Potri.011G113400	1.03	2.08	2.04	0.21	0.03	0	0.81	1.05	1.21	0.53	0.21	0.48	0.59	1.29	1	3.36	3.85	2.08
	Potri.011G114000	0.76	0.94	0.79	0.05	0	0.03	0.51	0.33	0.13	0.24	0.47	1.15	0.77	1	0.34	2.7	2.98	2.44
	Potri.012G006800	0	0.04	0	0.3	0.59	0.27	0.47	0.24	0.26	0	0	0.1	0.06	0.06	0.16	0.28	0.2	0.05
	Potri.012G042200	8.04	8.24	7.11	25.51	24.2	22.36	8.27	7.91	7.83	6.49	6.74	7.05	24.32	24.51	24.2	10.52	9.66	9.73
	Potri.012G049500	10.93	10.53	8.7	1.62	1.99	1.46	3.72	2.84	3.51	5.32	5.6	4.02	5.53	4.87	5.69	4.74	5.23	4.76
	Potri.012G052800	4.92	3.36	2.85	0.91	0.75	0.51	1.52	1.78	2.05	2.73	2.46	2.44	1.66	2.87	2.32	2.11	1.54	1.99
	Potri.012G070400	3.68	5.39	3.08	2.07	1.46	2.02	4.51	3.96	6.02	6.49	5.07	5.67	4.42	5.04	4.99	3.87	5.24	5.03
	Potri.012G111600	2.99	3.55	3.34	8.9	9.45	9.89	8.72	8.4	8.09	7.45	7.48	6.88	3.48	3.77	3.35	3.92	3.34	3.4
	Potri.013G066800	0	0	0	0	0	0	0	0	0	0	0	0	0	0	0	0	0	0
	Potri.013G083600	9.87	8.79	9.83	15.33	15.76	19.51	5.14	4.92	4.44	4.09	2.89	3.82	7.55	6.19	5.58	10.85	11.05	11.55
	Potri.013G137200	0.94	1.16	1.05	0	0	0	0.14	0.75	0.55	0.4	0.3	0.16	0.39	0.31	0.34	2.26	0.91	1.1
	Potri.013G154400	0.87	0.84	1.26	0	0	0	0	0	0	0	0	0.06	0.03	0.05	0.05	3.16	3.7	3.1
	Potri.013G156500	45.98	43.1	42.44	72.55	68.69	68.91	40.27	42.77	44.65	32.47	32.43	33.05	42.92	43.18	41.83	58.93	60.71	62.58
	Potri.013G156800	0.1	0	0.12	0	0.07	0.03	0.21	0.12	0.08	0.14	0.15	0.53	0.06	0	0.03	0	0.06	0.13
	Potri.014G143200	0.57	1.03	0.52	5.27	5.47	4.9	0.76	0.38	0.77	0.61	0.17	0.51	1.89	1.57	1.57	1.09	1.08	1.02
	Potri.015G003500	16.34	15.91	16.12	26.75	25.05	24.81	29.48	26.01	28.44	35.78	36.74	40.33	40.09	38.65	39.67	20.72	21.08	20.73
	Potri.015G003600	0.34	0.43	0.26	0.68	0.7	0.61	3.19	2.78	2.92	1.82	1.12	1.89	1.54	1.66	1.7	1.23	0.97	0.98
	Potri.015G031400	9.56	9.4	9.64	34.7	32.96	33.28	14.54	16.16	14.71	11.39	11.16	9.75	26.98	27.49	29	17.72	19.67	18.91
	Potri.015G109800	9.24	9.95	9.22	4.17	4.88	4.06	9.36	8.7	9.29	9.73	9.75	11.03	8.56	8.7	8.44	11.12	10.52	8.63
	Potri.016G058200	0.89	1.2	1.89	3.02	2.18	2.71	0.66	0.93	1.16	0.72	0.92	1	1.21	0.9	0.55	1.39	1.52	0.98
	Potri.016G084800	608.21	616.83	620.1	299.56	287.34	287.91	727.76	724.11	708.37	764.76	732.37	729.73	679.89	666.8	678.62	631.36	639.4	632.94
	Potri.016G125000	0.4	0.57	0.43	0.73	0.42	0.79	0.76	0.6	0.92	0.73	0.16	0.7	1.08	0.78	1.09	1.68	1.97	2.1
	Potri.016G132700	1.02	0.44	1.2	3.88	3.72	3.12	1.84	1.36	1.99	0.72	0.69	0.6	1.39	1.5	0.72	2.42	1.86	1.52
	Potri.016G132900	0	0	0	0.12	0.04	0.27	0.2	0	0	0.17	0	0.07	0	0	0	0	0	0.06
	Potri.017G037400	1.78	1.32	2.05	1.18	0.9	0.65	1.11	1.6	1.9	2.43	1.34	2.49	2.76	2.03	2.13	2.53	2.77	2.2
	Potri.017G037900	1.34	1	0.87	5.45	3.42	4.24	1.21	2.05	2.17	1.99	1.35	2.02	1.54	0.88	0.91	0.82	1.65	1.6
	Potri.017G038100	1.49	1.21	1.15	4.97	4.4	3.45	3.43	3.53	3.9	3.22	3.26	3.53	1.83	2.78	1.47	2.63	2.19	2.66
	Potri.017G064100	0.58	0.94	0.37	0.16	0.14	0.31	0.74	0.49	0.45	0.71	0.09	0.62	0.49	0.9	1.32	1.72	1.65	1.24
	Potri.017G140900	1.54	1.49	1.56	2.37	2.37	2.36	0.8	1.31	1.76	1.3	0.91	1.4	2.36	2.77	2.91	2.8	3.37	1.5
	Potri.018G027400	1.43	1.09	2.24	0.37	0.27	0.25	1.77	0.97	1.46	1.98	1.02	1.84	1.06	0.33	1.27	1.44	1.83	1.07
	Potri.018G029700	4.87	2.97	6.02	1.94	2.48	2.16	3.54	4.3	4.48	7.44	7.07	6.03	6.41	6.25	4.57	4.15	6.5	4.04
	Potri.018G063300	4.66	3.34	3.89	10.9	10.06	9.92	3.36	5.2	4.2	2.6	3.7	4.56	7.92	7.13	6.63	3.88	4.54	4.65
	Potri.018G089900	0.47	0.76	0.92	0.34	0.47	0.75	0.18	0.11	0.1	0.45	0.14	0.03	0.25	0.43	0.39	0.53	0.9	0.84
	Potri.018G123700	28.92	26.62	26.32	13.15	13.33	12.52	12.9	10.98	10.97	13.06	12.73	13.96	16.25	18.34	17.55	22.59	22.99	23.21
	Potri.019G024000	20.67	22.06	20.14	39.21	39.93	37.28	15.8	16.11	16.47	16.49	17.37	14.93	23.86	25.81	24.81	22.02	24.83	22.21
	Potri.T106200	0	0.04	0	0.15	0.18	0.21	0.07	0	0.16	0.08	0.14	0.13	0.26	0.11	0.32	0.05	0.08	0.04
	Potri.T160100	0.21	0	0.12	0.13	0.05	0.14	0.25	0.32	0.14	0.11	0	0.44	0.1	0.22	0.61	0.25	0.66	0.76
