# Supplementary material for: High temperature increased lignin contents of poplar (Populus spp) stem via inducing the synthesis caffeate and coniferaldehyde
Source: Front Genet. 2022 Sep 9;13:1007513. doi: 10.3389/fgene.2022.1007513 (PMC9500204; doi:10.3389/fgene.2022.1007513)
Supplement: Supplementary file 4 [file Table6.XLSX]

## Sheet: 0 h vs_6 h.KOG.classf
#ID	Class_Name	Numbers	Genes
J	Translation, ribosomal structure and biogenesis	61	Potri.002G188200;Potri.012G021700;Potri.018G115400;Potri.001G102500;Potri.009G066400;Potri.011G009600;Potri.002G187000;Potri.010G217100;Potri.004G172600;Potri.009G001500;Potri.005G098100;Potri.001G125200;Potri.014G083400;Potri.010G064700;Potri.010G163800;Potri.007G128300;Potri.005G198500;Potri.T037400;Potri.008G122900;Potri.014G153400;Potri.001G424900;Potri.013G139000;Potri.002G064600;Potri.010G0…
A	RNA processing and modification	88	Potri.017G123900;Potri.008G170400;Potri.004G093500;Potri.004G066100;Potri.012G145100;Potri.005G024600;Potri.007G134000;Potri.002G175000;Potri.003G164600;Potri.001G304100;Potri.012G045800;Potri.012G082600;Potri.018G016200;Potri.004G200400;Potri.008G192400;Potri.001G348200;Potri.006G264100;Potri.007G070700;Potri.005G198500;Potri.001G269500;Potri.006G163700;Potri.006G024000;Potri.012G144800;Potri.00…
K	Transcription	229	Potri.004G215100;Potri.015G067500;Potri.015G082700;Potri.012G075300;Potri.002G159900;Potri.012G039400;Potri.016G117300;Potri.014G124400;Potri.002G195700;Potri.002G173900;Potri.005G164900;Potri.012G119500;Potri.017G099800;Potri.005G227200;Potri.001G027000;Potri.008G081600;Potri.007G007900;Potri.016G048200;Potri.001G058200;Potri.009G041700;Potri.002G259000;Potri.003G083400;Potri.008G157600;Potri.01…
L	Replication, recombination and repair	93	Potri.004G053100;Potri.010G183800;Potri.006G234000;Potri.002G259000;Potri.005G222700;Potri.001G207000;Potri.003G083400;Potri.004G094200;Potri.014G128200;Potri.003G104700;Potri.003G094800;Potri.016G025800;Potri.015G090600;Potri.014G085900;Potri.007G102800;Potri.005G113300;Potri.011G089500;Potri.015G024300;Potri.004G111600;Potri.014G198000;Potri.005G020000;Potri.017G022500;Potri.010G056500;Potri.00…
B	Chromatin structure and dynamics	51	Potri.011G093200;Potri.005G227200;Potri.004G031300;Potri.002G210400;Potri.003G108400;Potri.001G016700;Potri.018G092900;Potri.005G026500;Potri.002G028800;Potri.003G036200;Potri.017G083200;Potri.002G233000;Potri.006G163700;Potri.007G104900;Potri.007G013500;Potri.005G115600;Potri.013G018200;Potri.009G058900;Potri.008G089500;Potri.013G028800;Potri.014G155900;Potri.T034000;Potri.014G096900;Potri.002G0…
D	Cell cycle control, cell division, chromosome partitioning	91	Potri.018G034100;Potri.016G033000;Potri.014G055400;Potri.003G103200;Potri.002G002900;Potri.005G258300;Potri.001G272000;Potri.015G061400;Potri.001G130700;Potri.007G139000;Potri.006G026500;Potri.005G251400;Potri.008G071900;Potri.008G083200;Potri.012G112200;Potri.006G035200;Potri.002G119000;Potri.010G051100;Potri.003G108400;Potri.005G142200;Potri.009G066600;Potri.014G055000;Potri.009G134500;Potri.00…
Y	Nuclear structure	5	Potri.012G017500;Potri.003G220100;Potri.001G168100;Potri.005G209600;Potri.006G103300
V	Defense mechanisms	41	Potri.001G140700;Potri.001G459400;Potri.016G126600;Potri.007G096500;Potri.006G087200;Potri.002G213100;Potri.011G089100;Potri.009G105000;Potri.005G237900;Potri.004G142800;Potri.004G143200;Potri.014G135900;Potri.003G082700;Potri.009G104000;Potri.009G052400;Potri.T168500;Potri.004G002800;Potri.009G104600;Potri.006G198800;Potri.009G105100;Potri.006G178700;Potri.005G072500;Potri.008G120200;Potri.004G0…
T	Signal transduction mechanisms	274	Potri.010G041400;Potri.001G029300;Potri.009G031300;Potri.002G118000;Potri.016G082800;Potri.005G259900;Potri.001G398000;Potri.005G033400;Potri.014G010900;Potri.017G036500;Potri.001G090300;Potri.017G143000;Potri.005G139200;Potri.001G425900;Potri.008G164400;Potri.010G107100;Potri.018G127300;Potri.006G076400;Potri.012G045000;Potri.018G135700;Potri.002G019300;Potri.002G130600;Potri.005G251300;Potri.00…
M	Cell wall/membrane/envelope biogenesis	54	Potri.008G012400;Potri.001G237200;Potri.001G012200;Potri.002G210000;Potri.015G023900;Potri.011G156100;Potri.014G129200;Potri.015G029100;Potri.012G052600;Potri.015G024200;Potri.010G244900;Potri.T063300;Potri.013G000900;Potri.003G046200;Potri.002G146500;Potri.003G074700;Potri.002G202300;Potri.017G139100;Potri.012G142300;Potri.018G025100;Potri.019G008400;Potri.003G162000;Potri.010G207200;Potri.001G0…
N	Cell motility	0	--
Z	Cytoskeleton	113	Potri.004G031600;Potri.004G193700;Potri.002G118000;Potri.002G201000;Potri.002G167800;Potri.003G053800;Potri.009G025300;Potri.004G100900;Potri.012G054400;Potri.001G436200;Potri.002G081300;Potri.003G127800;Potri.001G233700;Potri.001G106200;Potri.006G210700;Potri.006G192700;Potri.011G031200;Potri.T144900;Potri.014G100400;Potri.013G020700;Potri.017G081000;Potri.007G046700;Potri.005G142200;Potri.003G2…
W	Extracellular structures	12	Potri.008G012400;Potri.002G210000;Potri.010G244900;Potri.019G008400;Potri.003G162000;Potri.001G068100;Potri.008G027900;Potri.018G124900;Potri.015G087900;Potri.014G058200;Potri.006G054800;Potri.008G027600
U	Intracellular trafficking, secretion, and vesicular transport	102	Potri.013G055000;Potri.002G046200;Potri.002G165400;Potri.013G123600;Potri.016G071000;Potri.016G126400;Potri.015G118300;Potri.015G062800;Potri.010G105900;Potri.012G052600;Potri.014G029600;Potri.003G043200;Potri.006G214300;Potri.019G030800;Potri.001G024800;Potri.013G096700;Potri.013G053200;Potri.006G255400;Potri.012G075900;Potri.008G026900;Potri.003G004000;Potri.001G241500;Potri.013G144700;Potri.01…
O	Posttranslational modification, protein turnover, chaperones	378	Potri.003G055800;Potri.T125900;Potri.002G244500;Potri.012G119200;Potri.013G070300;Potri.002G046200;Potri.005G081300;Potri.014G146400;Potri.003G076000;Potri.001G042600;Potri.001G467100;Potri.014G170400;Potri.010G205700;Potri.008G054000;Potri.006G035000;Potri.017G084000;Potri.014G164900;Potri.005G160200;Potri.010G084800;Potri.001G291300;Potri.006G262700;Potri.015G056900;Potri.012G045000;Potri.010G1…
C	Energy production and conversion	153	Potri.016G017000;Potri.001G020900;Potri.010G102400;Potri.T120600;Potri.018G096000;Potri.016G014500;Potri.009G095300;Potri.017G045100;Potri.008G166800;Potri.017G045400;Potri.015G104500;Potri.T074500;Potri.003G021100;Potri.017G047800;Potri.007G140500;Potri.015G027800;Potri.016G044100;Potri.009G095100;Potri.003G204600;Potri.004G071000;Potri.002G162300;Potri.018G009000;Potri.006G171100;Potri.015G0920…
G	Carbohydrate transport and metabolism	243	Potri.007G015500;Potri.012G104800;Potri.008G083900;Potri.016G017000;Potri.005G116200;Potri.008G179300;Potri.015G074000;Potri.001G237200;Potri.011G010400;Potri.012G020500;Potri.001G283300;Potri.006G152600;Potri.001G001600;Potri.001G240300;Potri.005G168000;Potri.002G210000;Potri.003G037000;Potri.010G104500;Potri.015G091400;Potri.010G224300;Potri.006G094400;Potri.018G096000;Potri.016G014500;Potri.00…
E	Amino acid transport and metabolism	144	Potri.001G248600;Potri.001G283300;Potri.004G009600;Potri.005G115800;Potri.005G093200;Potri.004G190900;Potri.018G022200;Potri.015G097200;Potri.001G291300;Potri.002G122700;Potri.006G046600;Potri.001G320400;Potri.002G258900;Potri.012G070700;Potri.005G260300;Potri.004G019900;Potri.010G191000;Potri.012G105500;Potri.003G088800;Potri.010G034300;Potri.016G132200;Potri.017G152800;Potri.004G211900;Potri.00…
F	Nucleotide transport and metabolism	29	Potri.001G121400;Potri.019G031200;Potri.004G041800;Potri.013G043500;Potri.009G086800;Potri.008G058600;Potri.018G130200;Potri.008G080100;Potri.001G145700;Potri.008G197400;Potri.014G017200;Potri.002G222300;Potri.010G176500;Potri.019G078200;Potri.017G063900;Potri.001G292600;Potri.011G041200;Potri.016G119300;Potri.004G036400;Potri.010G113500;Potri.002G198600;Potri.014G123000;Potri.015G093200;Potri.01…
H	Coenzyme transport and metabolism	34	Potri.006G123200;Potri.001G226900;Potri.002G189000;Potri.015G105700;Potri.015G097200;Potri.004G087700;Potri.005G032300;Potri.008G099300;Potri.010G153500;Potri.013G004100;Potri.005G127100;Potri.001G320500;Potri.013G067300;Potri.008G053600;Potri.017G059400;Potri.007G053900;Potri.006G211300;Potri.015G068500;Potri.014G114700;Potri.T071000;Potri.010G246800;Potri.002G131000;Potri.002G189200;Potri.007G0…
I	Lipid transport and metabolism	163	Potri.T011100;Potri.007G002700;Potri.001G036900;Potri.010G236700;Potri.004G082000;Potri.001G121700;Potri.008G088900;Potri.009G056700;Potri.003G015000;Potri.003G116000;Potri.010G146400;Potri.011G164300;Potri.009G144900;Potri.005G092200;Potri.015G104500;Potri.006G100300;Potri.005G123200;Potri.003G192300;Potri.010G133800;Potri.016G034800;Potri.009G101700;Potri.011G050800;Potri.T063300;Potri.009G0339…
P	Inorganic ion transport and metabolism	123	Potri.005G079000;Potri.010G024700;Potri.009G045200;Potri.017G147000;Potri.T061300;Potri.010G082700;Potri.002G143900;Potri.015G144300;Potri.005G237300;Potri.006G093300;Potri.001G293400;Potri.010G158100;Potri.018G031600;Potri.005G223600;Potri.009G030800;Potri.001G158900;Potri.019G123700;Potri.001G251200;Potri.018G071400;Potri.005G051100;Potri.010G111700;Potri.009G024900;Potri.006G099900;Potri.006G2…
Q	Secondary metabolites biosynthesis, transport and catabolism	238	Potri.001G401100;Potri.011G150100;Potri.002G078600;Potri.001G327600;Potri.001G362200;Potri.010G236700;Potri.004G139700;Potri.003G128800;Potri.016G031100;Potri.001G382400;Potri.005G182700;Potri.008G073800;Potri.011G112400;Potri.008G088900;Potri.004G010100;Potri.001G381700;Potri.007G088000;Potri.007G104800;Potri.T061300;Potri.017G049600;Potri.011G071100;Potri.010G224200;Potri.005G092200;Potri.015G1…
R	General function prediction only	722	Potri.002G080300;Potri.009G109500;Potri.014G111800;Potri.003G038600;Potri.014G105900;Potri.013G089400;Potri.003G193200;Potri.013G026000;Potri.002G130900;Potri.008G044300;Potri.007G016800;Potri.002G030200;Potri.010G059800;Potri.009G112000;Potri.014G055400;Potri.011G150100;Potri.009G162100;Potri.001G258500;Potri.013G115600;Potri.003G103200;Potri.007G143600;Potri.T160800;Potri.019G094000;Potri.002G0…
S	Function unknown	136	Potri.013G018400;Potri.008G056200;Potri.004G206300;Potri.014G151800;Potri.005G236000;Potri.002G102600;Potri.005G174400;Potri.006G099700;Potri.011G167700;Potri.002G069400;Potri.012G005100;Potri.010G189200;Potri.010G136500;Potri.018G008000;Potri.001G277800;Potri.002G233800;Potri.006G112200;Potri.010G162500;Potri.002G017500;Potri.003G108100;Potri.001G057800;Potri.T093500;Potri.002G241700;Potri.019G0…

## Sheet: 0 h vs_12 h.KOG.classf
#ID	Class_Name	Numbers	Genes
J	Translation, ribosomal structure and biogenesis	11	Potri.011G009600;Potri.003G113500;Potri.006G053000;Potri.005G070300;Potri.008G121500;Potri.002G120900;Potri.T146500;Potri.014G139300;Potri.001G168100;Potri.008G206200;Potri.013G047400
A	RNA processing and modification	12	Potri.012G145100;Potri.001G348200;Potri.010G105200;Potri.014G145000;Potri.005G000500;Potri.004G077100;Potri.006G249100;Potri.014G097700;Potri.005G209600;Potri.008G206200;Potri.013G035600;Potri.018G146000
K	Transcription	74	Potri.015G082700;Potri.012G039400;Potri.002G173900;Potri.005G164900;Potri.001G027000;Potri.008G081600;Potri.012G080400;Potri.016G068200;Potri.T016900;Potri.005G063200;Potri.T120000;Potri.014G103000;Potri.005G001600;Potri.002G176300;Potri.015G070300;Potri.005G214800;Potri.007G102800;Potri.002G191800;Potri.006G241700;Potri.004G055700;Potri.002G100600;Potri.003G155700;Potri.018G053600;Potri.013G0010…
L	Replication, recombination and repair	19	Potri.001G116800;Potri.014G085900;Potri.007G102800;Potri.013G083900;Potri.001G099100;Potri.014G121000;Potri.001G070500;Potri.006G135200;Potri.012G114100;Potri.003G082600;Potri.002G197400;Potri.015G057300;Potri.T065600;Potri.012G039300;Potri.018G112800;Potri.001G151900;Potri.013G035600;Potri.004G131600;Potri.010G081500
B	Chromatin structure and dynamics	15	Potri.001G055200;Potri.003G108400;Potri.001G016700;Potri.002G028800;Potri.003G036200;Potri.007G104900;Potri.009G058900;Potri.013G028800;Potri.014G155900;Potri.001G016200;Potri.002G046400;Potri.003G040400;Potri.005G233900;Potri.006G041500;Potri.001G264000
D	Cell cycle control, cell division, chromosome partitioning	43	Potri.018G034100;Potri.016G033000;Potri.003G103200;Potri.018G076600;Potri.001G272000;Potri.001G130700;Potri.007G139000;Potri.009G093100;Potri.008G071900;Potri.006G035200;Potri.003G108400;Potri.005G142200;Potri.002G087600;Potri.004G228900;Potri.003G036200;Potri.001G292300;Potri.008G179600;Potri.002G121500;Potri.001G177100;Potri.007G048700;Potri.013G083800;Potri.014G101700;Potri.014G155900;Potri.00…
Y	Nuclear structure	3	Potri.001G168100;Potri.005G209600;Potri.006G103300
V	Defense mechanisms	20	Potri.001G358800;Potri.001G140700;Potri.004G075900;Potri.002G213100;Potri.011G089100;Potri.004G076000;Potri.004G143200;Potri.002G004100;Potri.002G148000;Potri.001G093300;Potri.006G198800;Potri.004G006500;Potri.004G142900;Potri.T168400;Potri.016G126500;Potri.004G076200;Potri.002G147700;Potri.001G032400;Potri.018G110300;Potri.017G110500
T	Signal transduction mechanisms	84	Potri.010G041400;Potri.005G259900;Potri.004G106800;Potri.005G040400;Potri.008G164400;Potri.001G116800;Potri.010G027100;Potri.018G022300;Potri.019G048800;Potri.008G130000;Potri.017G096200;Potri.016G010900;Potri.010G127100;Potri.006G128500;Potri.007G096400;Potri.009G074300;Potri.012G133900;Potri.001G271700;Potri.002G057900;Potri.006G141500;Potri.015G079000;Potri.004G006700;Potri.007G142100;Potri.01…
M	Cell wall/membrane/envelope biogenesis	27	Potri.008G012400;Potri.001G237200;Potri.002G210000;Potri.011G156100;Potri.015G029100;Potri.010G244900;Potri.017G139100;Potri.012G142300;Potri.019G008400;Potri.003G162000;Potri.010G207200;Potri.001G068100;Potri.010G004400;Potri.018G124900;Potri.017G057800;Potri.002G015300;Potri.012G037200;Potri.009G006500;Potri.005G058300;Potri.006G136700;Potri.006G178500;Potri.008G195100;Potri.002G033400;Potri.01…
N	Cell motility	0	--
Z	Cytoskeleton	58	Potri.004G031600;Potri.004G193700;Potri.004G100900;Potri.012G054400;Potri.001G436200;Potri.006G210700;Potri.006G192700;Potri.011G031200;Potri.T144900;Potri.013G020700;Potri.017G081000;Potri.005G142200;Potri.004G017500;Potri.009G040200;Potri.004G173800;Potri.002G111900;Potri.009G156000;Potri.005G150800;Potri.010G067100;Potri.016G077800;Potri.008G179600;Potri.009G111500;Potri.007G048700;Potri.008G1…
W	Extracellular structures	10	Potri.008G012400;Potri.002G210000;Potri.010G244900;Potri.019G008400;Potri.003G162000;Potri.001G068100;Potri.008G027900;Potri.018G124900;Potri.009G006500;Potri.014G058200
U	Intracellular trafficking, secretion, and vesicular transport	31	Potri.016G071000;Potri.013G053200;Potri.015G107600;Potri.018G051800;Potri.003G108900;Potri.018G030700;Potri.011G154700;Potri.010G165800;Potri.003G024800;Potri.010G165300;Potri.008G169400;Potri.001G124400;Potri.010G069000;Potri.005G224600;Potri.001G006000;Potri.001G237800;Potri.018G142800;Potri.014G039800;Potri.015G044300;Potri.005G078000;Potri.008G008700;Potri.010G164900;Potri.001G168100;Potri.01…
O	Posttranslational modification, protein turnover, chaperones	127	Potri.013G124700;Potri.013G070300;Potri.015G087400;Potri.001G467100;Potri.019G062000;Potri.010G113400;Potri.018G140600;Potri.015G087500;Potri.014G133900;Potri.T178900;Potri.004G187400;Potri.009G131800;Potri.012G038300;Potri.006G212700;Potri.013G010800;Potri.017G130700;Potri.014G133700;Potri.002G208500;Potri.004G073600;Potri.005G256000;Potri.014G106800;Potri.004G037800;Potri.010G061400;Potri.008G0…
C	Energy production and conversion	53	Potri.016G136100;Potri.001G402900;Potri.001G394400;Potri.007G044300;Potri.008G161600;Potri.016G125200;Potri.010G102400;Potri.015G104500;Potri.T074500;Potri.007G140500;Potri.014G125600;Potri.016G044100;Potri.003G204600;Potri.001G152600;Potri.002G162300;Potri.002G098300;Potri.007G114400;Potri.006G022900;Potri.016G022100;Potri.014G146000;Potri.001G348100;Potri.017G036900;Potri.006G010000;Potri.016G0…
G	Carbohydrate transport and metabolism	98	Potri.007G015500;Potri.005G116200;Potri.001G237200;Potri.005G033500;Potri.006G152600;Potri.002G210000;Potri.005G061600;Potri.003G131400;Potri.001G015100;Potri.010G191900;Potri.007G140500;Potri.018G123700;Potri.002G069000;Potri.012G126100;Potri.005G251000;Potri.004G019900;Potri.014G029900;Potri.012G002500;Potri.002G162300;Potri.004G211900;Potri.006G128000;Potri.018G121600;Potri.016G113300;Potri.00…
E	Amino acid transport and metabolism	45	Potri.013G124700;Potri.012G070700;Potri.010G068100;Potri.006G038700;Potri.004G019900;Potri.016G132200;Potri.004G211900;Potri.005G068900;Potri.008G172500;Potri.004G037800;Potri.004G106400;Potri.010G220200;Potri.018G001600;Potri.011G006800;Potri.001G084000;Potri.013G124900;Potri.001G247600;Potri.008G017100;Potri.001G370800;Potri.008G187400;Potri.012G070000;Potri.014G157500;Potri.007G052600;Potri.00…
F	Nucleotide transport and metabolism	10	Potri.019G031200;Potri.013G043500;Potri.009G086800;Potri.006G119500;Potri.002G222300;Potri.011G041200;Potri.010G113500;Potri.015G093200;Potri.005G049300;Potri.018G113400
H	Coenzyme transport and metabolism	9	Potri.001G234900;Potri.006G119500;Potri.001G380500;Potri.016G116400;Potri.010G246800;Potri.002G189200;Potri.006G102500;Potri.017G050400;Potri.008G159400
I	Lipid transport and metabolism	70	Potri.003G032800;Potri.005G064400;Potri.015G023000;Potri.005G092200;Potri.015G104500;Potri.016G034800;Potri.009G033900;Potri.009G064800;Potri.009G043700;Potri.T167900;Potri.006G036300;Potri.009G145400;Potri.017G099000;Potri.T102600;Potri.005G077600;Potri.007G002100;Potri.002G056800;Potri.007G059300;Potri.009G169900;Potri.018G148800;Potri.009G145000;Potri.001G340900;Potri.001G158700;Potri.011G0644…
P	Inorganic ion transport and metabolism	48	Potri.009G151400;Potri.005G100400;Potri.005G036300;Potri.010G180400;Potri.009G030800;Potri.005G213500;Potri.001G251200;Potri.010G111700;Potri.012G070300;Potri.T103500;Potri.016G124700;Potri.012G081800;Potri.001G305400;Potri.006G013900;Potri.005G079800;Potri.002G092200;Potri.015G003800;Potri.006G093200;Potri.008G077400;Potri.001G348900;Potri.007G087300;Potri.006G279000;Potri.001G234700;Potri.019G1…
Q	Secondary metabolites biosynthesis, transport and catabolism	123	Potri.002G078600;Potri.004G022800;Potri.005G182700;Potri.007G084700;Potri.004G010100;Potri.005G064400;Potri.007G104800;Potri.016G065900;Potri.011G071100;Potri.005G092200;Potri.015G104500;Potri.014G020500;Potri.007G083900;Potri.014G073700;Potri.009G143500;Potri.009G070100;Potri.009G033900;Potri.007G085000;Potri.009G064800;Potri.009G043700;Potri.T167900;Potri.003G006000;Potri.006G151600;Potri.T0795…
R	General function prediction only	211	Potri.015G125000;Potri.009G109500;Potri.014G105900;Potri.008G044300;Potri.002G019800;Potri.009G162100;Potri.003G103200;Potri.019G094000;Potri.002G078600;Potri.016G136100;Potri.002G049400;Potri.007G044300;Potri.007G080600;Potri.008G161600;Potri.004G022800;Potri.010G216000;Potri.013G013900;Potri.001G093700;Potri.005G182700;Potri.007G091200;Potri.011G117100;Potri.003G134100;Potri.017G036400;Potri.01…
S	Function unknown	30	Potri.005G122400;Potri.011G145600;Potri.013G099600;Potri.005G210000;Potri.009G136700;Potri.006G208300;Potri.001G246300;Potri.019G092000;Potri.006G230800;Potri.003G134300;Potri.001G012300;Potri.001G024600;Potri.015G080900;Potri.002G038600;Potri.006G133100;Potri.007G078700;Potri.006G096400;Potri.002G083300;Potri.008G157400;Potri.010G199100;Potri.008G221700;Potri.004G055500;Potri.014G060000;Potri.00…
X	Mobilome: prophages, transposons	0	--

## Sheet: 0 h vs_24 h.KOG.classf
#ID	Class_Name	Numbers	Genes
J	Translation, ribosomal structure and biogenesis	6	Potri.006G053000;Potri.T033700;Potri.003G008300;Potri.002G120900;Potri.T146500;Potri.003G007700
A	RNA processing and modification	0	--
K	Transcription	59	Potri.015G082700;Potri.012G039400;Potri.005G164900;Potri.001G027000;Potri.008G081600;Potri.016G068200;Potri.T016900;Potri.005G063200;Potri.T120000;Potri.014G103000;Potri.002G176300;Potri.015G070300;Potri.007G102800;Potri.001G284400;Potri.001G315200;Potri.002G191800;Potri.006G241700;Potri.004G055700;Potri.018G053600;Potri.013G001000;Potri.007G106100;Potri.019G129900;Potri.015G046200;Potri.006G1234…
L	Replication, recombination and repair	11	Potri.007G102800;Potri.010G056500;Potri.001G366700;Potri.001G099100;Potri.006G277500;Potri.006G135200;Potri.012G114100;Potri.003G082600;Potri.015G057300;Potri.008G103800;Potri.010G081500
B	Chromatin structure and dynamics	8	Potri.001G055200;Potri.003G108400;Potri.002G028800;Potri.009G058900;Potri.014G155900;Potri.001G016200;Potri.002G046400;Potri.001G264000
D	Cell cycle control, cell division, chromosome partitioning	31	Potri.018G034100;Potri.016G033000;Potri.018G076600;Potri.001G272000;Potri.007G139000;Potri.009G093100;Potri.006G035200;Potri.003G108400;Potri.005G142200;Potri.002G087600;Potri.004G228900;Potri.008G179600;Potri.014G005900;Potri.002G121500;Potri.001G177100;Potri.007G048700;Potri.013G083800;Potri.014G101700;Potri.014G155900;Potri.003G173300;Potri.009G165800;Potri.006G235000;Potri.006G080500;Potri.00…
Y	Nuclear structure	1	Potri.006G103300
V	Defense mechanisms	12	Potri.002G213100;Potri.004G143200;Potri.009G104000;Potri.002G148000;Potri.001G093300;Potri.006G198800;Potri.004G142900;Potri.016G126500;Potri.T091800;Potri.002G147700;Potri.001G032400;Potri.018G110300
T	Signal transduction mechanisms	56	Potri.001G138800;Potri.005G033400;Potri.004G106800;Potri.008G111600;Potri.012G002700;Potri.010G027100;Potri.018G041000;Potri.019G078300;Potri.005G102600;Potri.019G048800;Potri.001G099400;Potri.016G010900;Potri.010G127100;Potri.009G074300;Potri.002G057900;Potri.006G249900;Potri.017G116900;Potri.007G127000;Potri.011G067500;Potri.009G111500;Potri.001G092100;Potri.T013900;Potri.004G118600;Potri.001G0…
M	Cell wall/membrane/envelope biogenesis	15	Potri.008G012400;Potri.001G237200;Potri.012G033900;Potri.002G210000;Potri.011G156100;Potri.010G244900;Potri.006G118000;Potri.019G008400;Potri.003G162000;Potri.001G068100;Potri.017G057800;Potri.009G006500;Potri.006G136700;Potri.002G033400;Potri.014G092800
N	Cell motility	0	--
Z	Cytoskeleton	56	Potri.004G031600;Potri.004G193700;Potri.012G054400;Potri.001G436200;Potri.006G210700;Potri.011G031200;Potri.T144900;Potri.013G020700;Potri.017G081000;Potri.005G142200;Potri.004G017500;Potri.009G040200;Potri.004G173800;Potri.002G111900;Potri.009G156000;Potri.005G150800;Potri.010G067100;Potri.016G077800;Potri.008G179600;Potri.009G111500;Potri.007G048700;Potri.014G101700;Potri.003G173300;Potri.001G2…
W	Extracellular structures	9	Potri.008G012400;Potri.002G210000;Potri.010G244900;Potri.006G118000;Potri.019G008400;Potri.003G162000;Potri.001G068100;Potri.009G006500;Potri.014G058200
U	Intracellular trafficking, secretion, and vesicular transport	21	Potri.016G071000;Potri.006G214300;Potri.013G053200;Potri.015G107600;Potri.003G108900;Potri.010G165800;Potri.010G165300;Potri.001G124400;Potri.010G069000;Potri.005G224600;Potri.018G142800;Potri.014G039800;Potri.009G026900;Potri.008G008700;Potri.010G164900;Potri.002G041500;Potri.006G258900;Potri.019G063700;Potri.003G088300;Potri.006G103300;Potri.011G043700
O	Posttranslational modification, protein turnover, chaperones	73	Potri.015G087400;Potri.001G467100;Potri.014G170400;Potri.010G113400;Potri.018G140600;Potri.015G087500;Potri.T178900;Potri.004G187400;Potri.009G131800;Potri.012G038300;Potri.014G106800;Potri.008G058500;Potri.001G416500;Potri.010G201400;Potri.001G306200;Potri.001G424700;Potri.009G151300;Potri.010G206800;Potri.013G124900;Potri.002G097500;Potri.006G068900;Potri.016G086400;Potri.005G109600;Potri.009G1…
C	Energy production and conversion	29	Potri.001G394400;Potri.007G044300;Potri.016G125200;Potri.T074500;Potri.007G140500;Potri.016G044100;Potri.001G152600;Potri.002G162300;Potri.002G098300;Potri.007G114400;Potri.006G055600;Potri.014G146000;Potri.001G348100;Potri.017G045200;Potri.017G036900;Potri.005G185400;Potri.001G443100;Potri.018G109700;Potri.005G232300;Potri.005G073800;Potri.002G236500;Potri.004G207200;Potri.012G048700;Potri.005G1…
G	Carbohydrate transport and metabolism	74	Potri.007G015500;Potri.001G237200;Potri.005G033500;Potri.002G210000;Potri.005G061600;Potri.010G191900;Potri.007G140500;Potri.018G123700;Potri.002G069000;Potri.012G126100;Potri.014G029900;Potri.012G002500;Potri.002G162300;Potri.004G211900;Potri.006G128000;Potri.014G054800;Potri.003G112600;Potri.008G050700;Potri.004G162400;Potri.011G165000;Potri.002G098300;Potri.010G209900;Potri.006G173500;Potri.00…
E	Amino acid transport and metabolism	33	Potri.006G038700;Potri.005G102600;Potri.T107000;Potri.004G211900;Potri.008G172500;Potri.014G179400;Potri.001G084000;Potri.013G124900;Potri.001G247600;Potri.008G017100;Potri.001G370800;Potri.008G187400;Potri.012G070000;Potri.014G157500;Potri.007G052600;Potri.001G027100;Potri.010G126300;Potri.002G114300;Potri.008G086500;Potri.017G083700;Potri.014G135500;Potri.011G167000;Potri.001G347300;Potri.003G1…
F	Nucleotide transport and metabolism	7	Potri.009G086800;Potri.001G273500;Potri.011G041200;Potri.015G093200;Potri.015G096400;Potri.005G049300;Potri.018G113400
H	Coenzyme transport and metabolism	5	Potri.001G111600;Potri.001G234900;Potri.016G116400;Potri.017G050400;Potri.008G159400
I	Lipid transport and metabolism	43	Potri.009G144900;Potri.005G092200;Potri.016G034800;Potri.009G033900;Potri.009G064800;Potri.009G043700;Potri.006G036300;Potri.017G099000;Potri.T102600;Potri.007G002100;Potri.002G056800;Potri.007G059300;Potri.005G250700;Potri.009G169900;Potri.018G148800;Potri.001G158700;Potri.011G064400;Potri.008G012700;Potri.012G123900;Potri.012G041800;Potri.010G116300;Potri.002G126100;Potri.001G461400;Potri.007G0…
P	Inorganic ion transport and metabolism	34	Potri.009G151400;Potri.005G100400;Potri.010G180400;Potri.005G213500;Potri.001G251200;Potri.005G102600;Potri.010G111700;Potri.006G099900;Potri.012G070300;Potri.006G249900;Potri.007G055800;Potri.016G124700;Potri.012G081800;Potri.006G013900;Potri.006G158900;Potri.005G079800;Potri.001G348900;Potri.002G163400;Potri.019G100000;Potri.008G156600;Potri.003G080500;Potri.006G154700;Potri.003G125600;Potri.01…
Q	Secondary metabolites biosynthesis, transport and catabolism	91	Potri.011G150100;Potri.002G078600;Potri.004G022800;Potri.016G031100;Potri.005G182700;Potri.011G112400;Potri.007G104800;Potri.016G065900;Potri.011G071100;Potri.005G092200;Potri.003G198400;Potri.014G020500;Potri.002G121200;Potri.009G143500;Potri.009G070100;Potri.009G033900;Potri.009G064800;Potri.009G043700;Potri.003G006000;Potri.010G213400;Potri.009G102700;Potri.014G080200;Potri.017G099000;Potri.00…
R	General function prediction only	126	Potri.008G044300;Potri.011G150100;Potri.002G078600;Potri.002G049400;Potri.007G044300;Potri.004G022800;Potri.001G093700;Potri.005G182700;Potri.007G091200;Potri.003G134100;Potri.019G040100;Potri.013G120800;Potri.018G081700;Potri.005G033600;Potri.014G112000;Potri.009G047700;Potri.005G033200;Potri.001G202100;Potri.005G102800;Potri.012G114600;Potri.008G010600;Potri.008G144500;Potri.001G060900;Potri.01…
S	Function unknown	20	Potri.010G060700;Potri.005G122400;Potri.013G099600;Potri.005G210000;Potri.015G074200;Potri.006G208300;Potri.001G246300;Potri.003G134300;Potri.T093600;Potri.015G080900;Potri.006G133100;Potri.006G096400;Potri.002G083300;Potri.012G078900;Potri.005G054100;Potri.010G199100;Potri.008G059800;Potri.001G456000;Potri.008G092700;Potri.019G071900

## Sheet: 0 h vs_48 h.KOG.classf
#ID	Class_Name	Numbers	Genes
J	Translation, ribosomal structure and biogenesis	3	Potri.010G030500;Potri.T146500;Potri.010G225600
A	RNA processing and modification	1	Potri.005G024600
K	Transcription	38	Potri.005G164900;Potri.001G027000;Potri.008G081600;Potri.005G246700;Potri.016G068200;Potri.T120000;Potri.014G103000;Potri.002G176300;Potri.017G107500;Potri.002G100600;Potri.009G027300;Potri.005G150500;Potri.014G064200;Potri.019G129900;Potri.012G140700;Potri.005G074500;Potri.007G093900;Potri.010G165700;Potri.006G229200;Potri.002G031000;Potri.T011400;Potri.004G033100;Potri.001G083700;Potri.012G0237…
L	Replication, recombination and repair	16	Potri.005G222700;Potri.015G090600;Potri.014G085900;Potri.013G083000;Potri.014G064200;Potri.001G099100;Potri.014G121000;Potri.001G070500;Potri.001G074000;Potri.015G057300;Potri.018G126500;Potri.009G121500;Potri.018G112800;Potri.006G140800;Potri.004G131600;Potri.010G081500
B	Chromatin structure and dynamics	4	Potri.009G058900;Potri.002G046400;Potri.005G233900;Potri.001G264000
D	Cell cycle control, cell division, chromosome partitioning	25	Potri.018G034100;Potri.016G033000;Potri.001G272000;Potri.006G035200;Potri.005G142200;Potri.008G179600;Potri.001G177100;Potri.007G048700;Potri.008G183000;Potri.014G101700;Potri.003G173300;Potri.014G021100;Potri.009G165800;Potri.006G235000;Potri.001G055100;Potri.019G021800;Potri.005G181400;Potri.006G142500;Potri.019G120600;Potri.005G100000;Potri.002G010000;Potri.013G048900;Potri.002G080000;Potri.01…
Y	Nuclear structure	1	Potri.006G103300
V	Defense mechanisms	8	Potri.001G140700;Potri.009G052400;Potri.006G198800;Potri.004G142900;Potri.016G126500;Potri.002G033600;Potri.014G032600;Potri.004G230900
T	Signal transduction mechanisms	47	Potri.010G041400;Potri.006G076400;Potri.005G251300;Potri.001G405700;Potri.018G022300;Potri.018G041000;Potri.019G078300;Potri.001G069200;Potri.008G130000;Potri.017G096200;Potri.010G127100;Potri.009G074300;Potri.001G271700;Potri.006G249900;Potri.018G041900;Potri.013G046100;Potri.007G127000;Potri.001G092100;Potri.004G118600;Potri.003G201900;Potri.T124900;Potri.001G241300;Potri.005G035700;Potri.004G1…
M	Cell wall/membrane/envelope biogenesis	11	Potri.008G012400;Potri.012G033900;Potri.002G210000;Potri.015G023900;Potri.010G244900;Potri.003G162000;Potri.001G068100;Potri.010G004400;Potri.002G015300;Potri.003G123700;Potri.009G118800
N	Cell motility	0	--
Z	Cytoskeleton	34	Potri.004G031600;Potri.004G193700;Potri.012G054400;Potri.001G436200;Potri.011G031200;Potri.017G081000;Potri.005G142200;Potri.003G052800;Potri.002G111900;Potri.005G150800;Potri.008G179600;Potri.007G048700;Potri.014G101700;Potri.003G173300;Potri.016G045500;Potri.008G094700;Potri.013G011500;Potri.011G126400;Potri.014G080900;Potri.006G082900;Potri.001G055100;Potri.012G058400;Potri.011G140000;Potri.00…
W	Extracellular structures	5	Potri.008G012400;Potri.002G210000;Potri.010G244900;Potri.003G162000;Potri.001G068100
U	Intracellular trafficking, secretion, and vesicular transport	19	Potri.002G046200;Potri.016G071000;Potri.006G214300;Potri.001G024800;Potri.013G053200;Potri.010G165800;Potri.001G442500;Potri.010G151800;Potri.010G165300;Potri.001G124400;Potri.005G224600;Potri.002G200400;Potri.014G039800;Potri.005G078000;Potri.013G124600;Potri.006G258900;Potri.019G063700;Potri.003G088300;Potri.006G103300
O	Posttranslational modification, protein turnover, chaperones	66	Potri.002G046200;Potri.014G170400;Potri.019G055200;Potri.008G214800;Potri.001G437400;Potri.015G087500;Potri.001G097600;Potri.T178900;Potri.009G131800;Potri.002G014000;Potri.012G038300;Potri.006G212700;Potri.014G133700;Potri.014G106800;Potri.010G061400;Potri.003G143600;Potri.001G416500;Potri.010G201400;Potri.001G306200;Potri.001G219100;Potri.005G113100;Potri.001G087500;Potri.009G151300;Potri.011G0…
C	Energy production and conversion	39	Potri.016G125200;Potri.010G102400;Potri.015G104500;Potri.007G140500;Potri.015G027800;Potri.016G044100;Potri.003G204600;Potri.004G071000;Potri.006G171100;Potri.015G092000;Potri.002G098300;Potri.011G044600;Potri.007G114400;Potri.007G141900;Potri.013G118700;Potri.016G022100;Potri.001G122400;Potri.017G036900;Potri.001G047600;Potri.014G073600;Potri.001G313000;Potri.014G019200;Potri.005G185400;Potri.00…
G	Carbohydrate transport and metabolism	68	Potri.011G010400;Potri.002G210000;Potri.006G094400;Potri.005G061600;Potri.003G131400;Potri.001G015100;Potri.007G140500;Potri.015G027800;Potri.002G069000;Potri.004G019900;Potri.012G002500;Potri.004G071000;Potri.004G211900;Potri.006G128000;Potri.016G113300;Potri.006G171100;Potri.014G054800;Potri.003G112600;Potri.016G011000;Potri.008G050700;Potri.011G165000;Potri.002G098300;Potri.004G129700;Potri.00…
E	Amino acid transport and metabolism	31	Potri.004G019900;Potri.005G181600;Potri.004G211900;Potri.003G190600;Potri.004G106400;Potri.001G084000;Potri.013G124900;Potri.008G017100;Potri.001G370800;Potri.012G070000;Potri.014G157500;Potri.007G052600;Potri.001G027100;Potri.010G126300;Potri.006G027000;Potri.004G012100;Potri.008G000300;Potri.014G154200;Potri.003G111500;Potri.003G212900;Potri.003G187200;Potri.004G052500;Potri.001G145200;Potri.00…
F	Nucleotide transport and metabolism	4	Potri.009G086800;Potri.017G063900;Potri.011G041200;Potri.010G113500
H	Coenzyme transport and metabolism	5	Potri.001G111600;Potri.010G153500;Potri.001G234900;Potri.017G050400;Potri.015G097000
I	Lipid transport and metabolism	40	Potri.T011100;Potri.015G023000;Potri.005G092200;Potri.015G104500;Potri.016G034800;Potri.009G033900;Potri.009G043700;Potri.001G270300;Potri.017G099000;Potri.012G047300;Potri.007G002100;Potri.009G145000;Potri.001G270500;Potri.001G158700;Potri.014G029100;Potri.003G142000;Potri.001G270400;Potri.002G165800;Potri.012G123900;Potri.002G126100;Potri.018G149300;Potri.001G461400;Potri.007G089000;Potri.019G0…
P	Inorganic ion transport and metabolism	44	Potri.009G151400;Potri.005G100400;Potri.018G053300;Potri.002G143900;Potri.010G114600;Potri.010G111700;Potri.012G070300;Potri.006G249900;Potri.006G069500;Potri.001G098300;Potri.016G124700;Potri.006G013900;Potri.018G072000;Potri.002G092200;Potri.016G124900;Potri.001G348900;Potri.014G061400;Potri.006G279000;Potri.008G159000;Potri.001G318500;Potri.005G223500;Potri.019G100000;Potri.008G156600;Potri.00…
Q	Secondary metabolites biosynthesis, transport and catabolism	81	Potri.002G078600;Potri.004G022800;Potri.005G182700;Potri.004G010100;Potri.011G071100;Potri.005G092200;Potri.015G104500;Potri.005G084500;Potri.009G143500;Potri.009G070100;Potri.009G033900;Potri.007G085000;Potri.003G182800;Potri.005G029600;Potri.009G043700;Potri.003G006000;Potri.010G153800;Potri.005G184400;Potri.006G151600;Potri.010G213400;Potri.001G098300;Potri.009G102700;Potri.001G270300;Potri.01…
R	General function prediction only	111	Potri.009G109500;Potri.008G044300;Potri.002G078600;Potri.004G022800;Potri.001G093700;Potri.005G182700;Potri.007G091200;Potri.003G147400;Potri.004G089700;Potri.T037100;Potri.005G251300;Potri.004G001000;Potri.014G112000;Potri.005G033200;Potri.001G202100;Potri.001G147300;Potri.001G060900;Potri.013G041900;Potri.013G122500;Potri.015G029400;Potri.004G020500;Potri.009G010200;Potri.006G015300;Potri.008G1…
S	Function unknown	17	Potri.005G122400;Potri.007G024000;Potri.009G131700;Potri.009G136700;Potri.019G092000;Potri.004G129400;Potri.T093600;Potri.T069600;Potri.012G078900;Potri.010G199100;Potri.016G134000;Potri.005G173800;Potri.001G345400;Potri.010G185900;Potri.015G042300;Potri.018G112500;Potri.001G288600

## Sheet: 0 h vs_72 h.KOG.classf
#ID	Class_Name	Numbers	Genes
J	Translation, ribosomal structure and biogenesis	1	Potri.T146500
A	RNA processing and modification	1	Potri.002G226700
K	Transcription	17	Potri.001G027000;Potri.007G135100;Potri.002G191800;Potri.005G150500;Potri.006G117700;Potri.015G129100;Potri.010G165700;Potri.002G157600;Potri.004G033100;Potri.014G035100;Potri.008G089700;Potri.013G067000;Potri.015G075600;Potri.002G142800;Potri.009G053900;Potri.005G224100;Potri.002G128900
L	Replication, recombination and repair	2	Potri.006G277500;Potri.T065600
B	Chromatin structure and dynamics	0	--
D	Cell cycle control, cell division, chromosome partitioning	8	Potri.010G051100;Potri.005G142200;Potri.007G048700;Potri.009G165800;Potri.017G052600;Potri.019G120600;Potri.005G100000;Potri.002G010000
Y	Nuclear structure	0	--
V	Defense mechanisms	6	Potri.009G052400;Potri.006G198800;Potri.004G142900;Potri.016G126500;Potri.001G032400;Potri.010G127600
T	Signal transduction mechanisms	41	Potri.T096100;Potri.005G259900;Potri.008G164400;Potri.017G133700;Potri.009G167400;Potri.001G278500;Potri.019G078300;Potri.018G071400;Potri.001G099400;Potri.006G249900;Potri.006G141500;Potri.007G127000;Potri.001G381000;Potri.010G187000;Potri.001G092100;Potri.010G074300;Potri.001G241300;Potri.005G035700;Potri.002G222700;Potri.006G277500;Potri.001G330000;Potri.010G221400;Potri.004G122900;Potri.002G2…
M	Cell wall/membrane/envelope biogenesis	5	Potri.012G033900;Potri.015G029100;Potri.015G024200;Potri.017G057800;Potri.014G092800
N	Cell motility	0	--
Z	Cytoskeleton	8	Potri.005G142200;Potri.007G048700;Potri.013G011500;Potri.011G126400;Potri.014G080900;Potri.006G048600;Potri.T113300;Potri.019G120600
W	Extracellular structures	0	--
U	Intracellular trafficking, secretion, and vesicular transport	5	Potri.013G053200;Potri.003G108900;Potri.008G169400;Potri.003G088300;Potri.012G054100
O	Posttranslational modification, protein turnover, chaperones	25	Potri.008G214800;Potri.002G014000;Potri.006G024200;Potri.004G037800;Potri.010G201400;Potri.018G098000;Potri.008G219200;Potri.008G174900;Potri.004G175500;Potri.001G254500;Potri.014G141500;Potri.006G131000;Potri.005G204600;Potri.009G002200;Potri.008G036900;Potri.017G052600;Potri.015G064800;Potri.018G014800;Potri.005G036800;Potri.011G114000;Potri.012G082800;Potri.009G034800;Potri.005G180300;Potri.00…
C	Energy production and conversion	23	Potri.001G281900;Potri.010G102400;Potri.017G045100;Potri.017G045400;Potri.017G052000;Potri.017G047800;Potri.017G052100;Potri.007G141900;Potri.001G348100;Potri.002G098400;Potri.001G313000;Potri.001G281800;Potri.010G246800;Potri.001G443100;Potri.001G303000;Potri.017G052400;Potri.005G172400;Potri.007G113000;Potri.001G303600;Potri.002G236400;Potri.002G030500;Potri.T148700;Potri.T105900
G	Carbohydrate transport and metabolism	31	Potri.008G179300;Potri.001G281900;Potri.T177800;Potri.005G061600;Potri.001G227300;Potri.017G052000;Potri.017G052100;Potri.002G069000;Potri.001G227400;Potri.004G211900;Potri.004G129700;Potri.007G141900;Potri.001G348100;Potri.010G150400;Potri.002G098400;Potri.001G313000;Potri.001G281800;Potri.001G303000;Potri.018G094000;Potri.001G226100;Potri.017G052400;Potri.001G225900;Potri.008G189400;Potri.001G1…
E	Amino acid transport and metabolism	12	Potri.004G211900;Potri.008G172500;Potri.004G037800;Potri.014G179400;Potri.008G141100;Potri.019G067500;Potri.003G187000;Potri.001G027100;Potri.004G075200;Potri.017G014200;Potri.007G100100;Potri.001G144800
F	Nucleotide transport and metabolism	2	Potri.019G031200;Potri.011G041200
H	Coenzyme transport and metabolism	1	Potri.010G246800
I	Lipid transport and metabolism	24	Potri.015G023000;Potri.016G034800;Potri.009G033900;Potri.006G036300;Potri.001G424300;Potri.017G099000;Potri.001G270500;Potri.001G158700;Potri.006G253900;Potri.001G270400;Potri.004G208500;Potri.002G126100;Potri.018G149300;Potri.001G461400;Potri.005G199900;Potri.001G105900;Potri.008G125300;Potri.012G069800;Potri.012G069700;Potri.007G002400;Potri.009G064900;Potri.004G185000;Potri.013G013500;Potri.00…
P	Inorganic ion transport and metabolism	16	Potri.002G143900;Potri.005G223600;Potri.018G071400;Potri.006G249900;Potri.006G158900;Potri.002G092200;Potri.T108000;Potri.001G348900;Potri.014G061400;Potri.001G318500;Potri.005G223500;Potri.019G040200;Potri.002G047500;Potri.002G005500;Potri.008G173800;Potri.005G256100
Q	Secondary metabolites biosynthesis, transport and catabolism	43	Potri.011G150100;Potri.004G139700;Potri.005G182700;Potri.016G065900;Potri.011G071100;Potri.009G143500;Potri.009G033900;Potri.007G085000;Potri.006G151600;Potri.T079500;Potri.001G424300;Potri.017G099000;Potri.006G096900;Potri.001G176500;Potri.018G146100;Potri.001G270500;Potri.001G278200;Potri.004G018800;Potri.010G089000;Potri.001G270400;Potri.009G107400;Potri.006G097100;Potri.010G193100;Potri.002G1…
R	General function prediction only	63	Potri.015G125000;Potri.014G111800;Potri.003G193200;Potri.008G044300;Potri.010G059600;Potri.011G150100;Potri.005G141800;Potri.004G139700;Potri.005G182700;Potri.007G091200;Potri.003G134100;Potri.013G125000;Potri.008G044700;Potri.005G033200;Potri.001G202100;Potri.001G147300;Potri.001G060900;Potri.013G041900;Potri.001G003200;Potri.009G010200;Potri.008G149200;Potri.006G272800;Potri.010G060100;Potri.01…
S	Function unknown	2	Potri.T131500;Potri.015G074200
