# Supplementary material for: High temperature increased lignin contents of poplar (Populus spp) stem via inducing the synthesis caffeate and coniferaldehyde
Source: Front Genet. 2022 Sep 9;13:1007513. doi: 10.3389/fgene.2022.1007513 (PMC9500204; doi:10.3389/fgene.2022.1007513)
Supplement: Supplementary file 6 [file Table4.XLSX]

## Sheet: All.DEG_final
#ID	0h-1	0h-2	0h-3	HT1-6h	HT2-6h	HT3-6h	HT1-12h	HT2-12h	HT3-12h	HT1-24h	HT2-24h	HT3-24h	HT1-48h	HT2-48h	HT3-48h	HT1-72h	HT2-72h	HT3-72h
Potri.001G001100	0.02	0	0.08	0.74	0.53	0.45	0	0.25	0.23	0	0.14	0.05	0.02	0.11	0.06	0.03	0	0.09
Potri.001G001200	0.87	0.87	0.69	0.48	0.22	0.29	0.55	0.29	0.52	0.63	0.45	0.57	0.71	0.64	1.13	0.66	0.51	0.78
Potri.001G001600	24.05	25.18	24.82	54.74	53.06	53.24	28.58	29.49	27.96	26.81	26.46	25.07	36.57	36.17	35.64	32.19	33.09	30.29
Potri.001G001800	1	0.8	0.97	0.11	0.28	0.3	1.19	1.38	0.94	1.71	1.54	1.17	1.87	1	1.79	1.49	1.28	0.76
Potri.001G002000	1176.72	1193.54	1161.22	463.85	483.37	479.83	797.82	806.28	818.97	897.63	914.98	908.98	824.84	802.64	819	1053.08	1050.59	1049.17
Potri.001G003200	0.44	0.41	0.31	0.36	0.51	0.49	0.4	0.36	0.48	0.54	0.55	0.39	0.78	0.89	0.77	1.89	1.84	1.82
Potri.001G003300	0.81	0.7	0.63	1.12	2.11	1.64	0.98	0.85	0.61	0.91	0.67	0.22	0.7	1.1	0.92	0.74	1.05	1.14
Potri.001G003700	23.72	25.96	25.18	12.59	12.4	11.35	23.34	26.69	21.29	27.45	23.59	24.83	34.47	27.33	30.94	28.47	27.76	29.62
Potri.001G004000	2	1.6	2.13	5.67	5.53	4.84	2.56	2.67	1.94	2.52	3.1	2.73	2.58	2.45	2.54	1.83	2.48	2.62
Potri.001G004300	26.72	31.63	28.37	13.67	13.54	13.58	27.96	28.07	27.53	32.6	31.32	29.19	21.82	20.49	21.29	23.18	26.58	22.31
Potri.001G005200	2.59	3.2	4.33	1.3	1.3	2.08	0.56	1.94	0.59	1.22	1.9	1.22	0.78	1.73	0.74	1.4	1.1	2.18
Potri.001G005300	1.04	0.92	0.9	0.34	0.55	0.35	0.58	0.74	0.43	0.48	0.61	0.66	0.66	0.84	0.84	0.87	0.71	1.01
Potri.001G005500	11.8	13.14	11.58	28.39	29.74	27.86	16.13	16.71	16.3	14.9	15.25	14.08	15.91	16.01	17.05	14.08	16.15	13.44
Potri.001G005700	0.28	0.18	0.36	0.8	1.21	0.73	0.74	0.69	0.64	0.69	0.64	0.32	0.69	0.44	0.62	0.97	0.82	0.94
Potri.001G006000	3.3	1.89	2.18	5.67	4.53	5.02	6.3	5.01	5.94	3.01	2.73	4.38	2.39	3.69	1.53	3.27	3.79	3.69
Potri.001G006600	3.19	4.2	3.72	9.42	9.91	9.66	5.99	4.86	4.64	3.72	3.81	4.49	6.03	5.83	5.52	4.44	4.83	3.47
Potri.001G007000	62.05	67.32	58.55	28.07	27.77	28.29	38.27	37	33.83	43.56	36.66	39.77	28.51	27.28	30.55	40.51	40.67	40.44
Potri.001G007100	0.54	1.3	0.8	0.06	0.2	0.11	1.26	1.58	1.25	1.18	0.59	1.66	0.77	0.97	0.8	0.64	0.98	1.31
Potri.001G008400	83.34	72.08	74.3	31.08	35.47	36.32	65.66	63.48	64.14	70.3	76.58	73.83	61.92	63.9	70.11	66.96	68.03	71.04
Potri.001G008500	11.42	12.54	11.78	39.77	36.25	36.15	25.28	21.22	24.4	18.13	18.3	16.31	23.15	24.48	23.71	15.95	14.96	14.77
Potri.001G009100	2.29	3.04	3.48	15.4	18.69	14.08	5.26	4.35	5.72	5.6	4.21	3.8	5.1	4.51	5.26	4.79	6.01	6.45
Potri.001G009600	3.8	3.64	3.36	10.11	10.83	10.04	7.17	7.24	7.9	5.84	6.17	6.63	4.7	6.13	5.69	3.59	4.63	4.92
Potri.001G010300	0.45	0.48	0.53	3.6	3.03	2.41	0.41	1.23	0.64	0.46	0.71	0.44	0.71	0.48	0.59	0.18	0.42	0.35
Potri.001G010600	1.63	0.4	1.93	1.9	1.66	2.03	1.96	2.25	1.95	1.48	1.06	2.19	2.39	1.24	1.68	3.47	2.98	4.2
Potri.001G011000	0.88	1.5	1.02	3.84	4.57	4.06	3.55	2.13	2.19	1.94	1.63	1.71	2.09	1.75	2.05	1.76	2.56	2.24
Potri.001G011200	0.7	0.64	0.45	2.23	2.54	2.7	2.08	1.79	1.49	0.87	0.76	1.17	1.3	1.22	1.18	0.74	1.45	1.39
Potri.001G011300	0.72	0.21	0.62	2.71	2.86	3.06	1.38	1.51	1.94	0.78	0.51	0.8	1.36	1.01	1.38	0.94	0.85	0.99
Potri.001G011800	29.9	30.23	31.01	9.21	10.44	9.63	25.7	26.43	25.37	31.3	31.73	31.74	22.81	21.64	22.36	24.52	25.68	27.26
Potri.001G012200	18.69	17.45	19.03	42.4	44.15	43.71	27.01	26.51	25.62	19.89	22.32	22.24	23.49	27.26	25.95	19.29	18.16	18.77
Potri.001G012300	0.69	0.85	1.03	3.63	4.17	3.47	1.94	2.38	2.99	1.39	1.72	1.38	1.48	2.2	1.38	0.86	1.27	0.85
Potri.001G012500	0.79	0.76	1.19	0.28	0.3	0.67	0.99	0.66	0.88	0.41	0.38	0.35	1.12	0.92	1	0.21	0.12	0.51
Potri.001G012700	0.42	0.23	0.38	1.58	1.01	1.11	0.8	0.37	0.71	0.2	0.3	0.56	0.12	0.24	0.26	0.32	0.3	0.32
Potri.001G015100	0.23	0.07	0.29	4.96	3.49	3.28	2.46	0.97	1.46	0.53	0.17	0.57	1.35	1.82	2.6	0.28	0.33	0.3
Potri.001G015500	0.05	0.14	0.19	0.58	0.5	0.49	0.09	0.18	0.16	0.01	0	0	0.16	0.09	0.08	0.23	0.19	0.07
Potri.001G015600	0.37	0.28	0.2	0.55	1.05	0.78	0.43	0.38	0.31	0.03	0	0.02	0.15	0.13	0.2	0.23	0.15	0.17
Potri.001G015700	3.03	2.51	3.55	12.07	11.68	11.08	6.11	5.65	6.6	3.22	4.37	2.95	5	5.14	4.65	2.94	3.56	2.79
Potri.001G016000	4.63	4.08	5.08	1.26	1.4	1.7	6.43	6.32	6.58	8.33	9.84	8.61	2.86	3.89	3.41	3.53	3.87	3.56
Potri.001G016200	7.3	7.12	6.98	4.98	6.97	6.38	18.5	19.12	18.2	21.72	21.2	18.81	13.03	11.72	13.5	7.52	7.58	6.43
Potri.001G016300	3.7	3.05	3.59	10.36	10.69	9.58	3.69	2.58	3.07	4.01	4.69	3.99	5.37	5.93	6.32	3.43	4.06	2.62
Potri.001G016700	3.26	2.31	2.55	17.76	19	20.99	7.28	7.62	5.17	3.42	3.38	4.83	3.83	4.58	5.56	3.17	2.72	2.52
Potri.001G016900	6.73	5.09	5.5	35.2	39.36	36.11	10.05	12.01	9.65	6.28	6.15	6.92	6.69	9.14	9.59	5.85	5.5	8.36
Potri.001G017000	26.66	25.05	24.22	11.97	12.55	13.85	24.49	26.76	25.43	21.85	22.43	21.4	17.77	19.61	19.37	28.17	28.44	26.16
Potri.001G017100	14.92	13.13	12.18	5.96	6.12	6.76	11.34	9.55	10.17	13.36	12.68	12.77	10.22	8.89	10.4	9.91	10.8	11.09
Potri.001G017900	0.58	0.52	0.84	1.85	1.65	1.97	2.34	2.36	2.33	1.22	1.24	1.05	0.96	1.3	0.94	0.96	1.09	1.16
Potri.001G018600	114.34	104.78	99.75	47.97	50.69	49.29	133.92	131.54	135.36	171.49	165.06	164.53	87.93	85.44	93.63	90.84	93.74	89.07
Potri.001G018700	2.86	3.15	3.4	8.17	7.34	7.76	5.21	4.8	4.99	5.05	3.78	5.04	3.64	4.27	3.62	2.51	2.06	1.77
Potri.001G019500	2.56	2.3	2.25	0.6	0.63	0.65	2.18	1.57	2.01	2.04	1.66	2.27	2.45	2.68	3.09	2.15	2.1	2.02
Potri.001G019600	1.69	1.15	1.38	4.13	4.19	4.9	1.75	1.97	1.96	1.61	1.85	1.7	2.31	2.12	2.11	1.51	2.76	1.71
Potri.001G019700	9.93	10.39	10.36	8.47	9.16	9.75	3.17	3.38	4.39	5.47	5.49	5.63	5.26	5.01	5.75	7.35	4.3	5.32
Potri.001G020500	2.69	1.93	2.73	1.21	0.97	0.77	1.25	1.76	1.43	1.93	1.83	1.66	1.84	2.15	2.18	2.64	1.06	1.8
Potri.001G020900	3.35	3.58	3.16	1.47	1.66	1.45	3.98	4.05	3.84	5.32	3.98	5.88	4.33	4.98	4.01	3.89	3.95	2.79
Potri.001G021500	9.11	10.31	10.06	4.9	5.04	5.6	11.33	14.35	10.74	13.19	12.52	10.52	9.84	7.6	9.3	8.65	9.32	9.03
Potri.001G022900	0.39	0.34	0.26	2.05	1.89	2.26	0.78	0.98	0.43	0.67	0.85	0.62	0.41	0.63	0.39	0.69	0.36	0.26
Potri.001G023400	0.15	0.09	0.09	0.19	0.34	0.57	0.3	0.35	0.11	0.19	0.16	0.16	0.42	0.53	0.52	0.43	0.32	0.41
Potri.001G023900	12.19	14.34	13.27	5.49	5.16	4.66	12.49	13.35	15.04	15.84	19.82	15.33	12.18	10.82	10.87	12.3	14.44	12.81
Potri.001G024600	2.5	2.07	2	0.74	0.72	0.81	0.83	0.83	0.83	1.28	1.45	1.12	1.18	1.23	1.68	2.12	1.64	1.31
Potri.001G024800	52.46	52.02	55.35	7.33	5.84	6.95	41.99	41.57	40.33	29.99	30.06	28.44	27.27	27.91	26.75	40.15	37.67	38.88
Potri.001G024900	213.14	224.88	212.7	45.13	44.42	45.9	187.06	181.67	184.43	128.17	132.65	126.76	132.58	137.24	138.71	204.78	203.37	198.55
Potri.001G025100	55.61	57.14	55.39	49.06	49.91	48.54	18.7	18.72	18.61	11.76	11.53	12.01	28.93	29.84	27.17	45.62	44.28	44.25
Potri.001G025200	0.39	0.22	0.14	0.63	1.19	0.95	0.84	0.9	0.5	0.36	0.17	0.52	0.44	0.62	0.38	0.33	0.36	0.21
Potri.001G026500	2.51	1.75	2.09	5.45	8.24	5	7.29	6.36	7.59	7.79	9.69	7.6	6.28	3.16	2.86	2.91	5.24	2.52
Potri.001G026900	1.28	1.61	1.68	4.31	4.08	4.49	1.84	1.96	1.84	2.03	1.36	1.53	2.61	2.8	2.49	2.05	2.2	2.64
Potri.001G027000	0.4	0.41	0.81	3.77	4.1	3.2	4.13	2.15	1.88	1.43	1.69	1.58	1.67	1.26	1.89	1.26	1.64	2.19
Potri.001G027100	0.84	1.07	1.22	10.53	10.57	9.8	4.28	3.2	4.84	4.3	4.32	5.41	2.23	2	2.61	3.47	2.52	3.42
Potri.001G027700	1.1	1.52	1.59	6.49	6.68	5.89	3.55	2.45	3.45	2.19	3	2.42	1.68	2.19	1.77	2.14	1.61	1.51
Potri.001G028000	21.02	23.62	20.38	48.09	48.22	49.1	16.9	21.5	21.2	22.25	19.83	20.93	24.18	21.41	20.66	21.19	23.2	22.85
Potri.001G028200	58.06	57.19	58.2	185.35	191.61	182.71	147.29	148.32	154.68	121.55	113.57	117.01	129.34	132.11	127.66	91.25	87.68	93.07
Potri.001G029000	1.49	1.95	2.45	0.56	0.67	0.76	0.95	1.07	1.66	1.14	1.72	1.8	2.08	1.43	0.9	1.07	1.48	1.4
Potri.001G029300	7.32	8.11	6.97	2.62	2.97	2.42	6.42	4.95	5.6	5.86	7.73	7	5.41	5.92	5.93	7.64	6.95	7.19
Potri.001G030000	66.92	62.16	62.77	30.95	29.28	32.03	58.95	62.36	59.57	66.48	61.54	63.63	62.55	59.31	59.18	63.89	69.82	66.09
Potri.001G031800	43.99	46.37	44.27	40.69	39.36	41.45	8.06	7.11	7.48	8.42	8.43	9.25	20.2	19.72	19.61	31.37	31.94	31.97
Potri.001G032200	1.16	0.82	1.27	1.05	1.09	1.41	0.11	0.14	0.2	0.85	0.14	0.2	0.86	0.23	0.54	0.57	0.76	1.1
Potri.001G032400	1.26	1.74	2.13	2.68	2.36	2.37	0.76	0.78	0.59	0.64	0.17	0.37	2.96	2.95	2.81	4.35	3.73	3.89
Potri.001G033100	0.52	0.34	0.53	0.13	0.15	0.14	0.44	0.29	0.41	0.38	0.26	0.3	0.55	0.35	0.4	0.34	0.49	0.28
Potri.001G033500	6.62	6.65	5.98	2.15	2.28	2.1	3.22	3.36	3.04	5.06	5.63	5.08	4.75	5.8	4.51	6.49	5.22	5.6
Potri.001G033800	0.71	0.74	0.8	0.69	0.81	1	2.04	1.88	2.15	1.08	1.07	1.34	1.34	1.05	1.38	0.82	0.9	1.06
Potri.001G034300	2.52	2.49	2.84	1.09	1.48	1.36	1.96	1.43	1.62	1.7	2.11	1.87	2.42	2.65	2.69	2.73	2.22	2.64
Potri.001G034600	5.34	6.96	8.13	2.77	2.45	3.14	7.83	9.11	7.28	10.26	9.88	9.65	5.99	6.29	5.97	6.65	6.8	6.17
Potri.001G035500	10.33	11.08	11.82	4.14	5.39	5.14	5.78	6.57	7.25	7.85	8.26	9.02	8.52	9.82	7.53	9.9	9.79	9.37
Potri.001G035600	0.58	0.28	0.42	0.1	0.03	0.03	0.28	0.63	0.62	0.18	0.42	0.16	0.46	0.27	0.3	0.38	0.4	0.56
Potri.001G036900	19.91	23.24	21.92	59.12	61.24	56.3	26.96	26.2	27.93	31.7	32.18	29.3	28.96	22.15	27.33	25.98	28.22	24.79
Potri.001G038200	3.8	3.87	3.44	8.95	7.47	8.36	2.77	3.32	3.04	1.93	1.92	2.75	4.01	3.8	2.93	3.24	2.36	3.88
Potri.001G040000	0.9	1.17	1.19	1.14	1.49	1.49	2.68	3.43	3.17	2.65	2.69	2.26	1.43	1.94	1.99	1.23	1.09	0.86
Potri.001G040900	0.46	0.29	0.41	0.25	0.45	0.7	0.84	1.41	0.78	1.3	1.07	1.51	0.58	1.01	0.65	0.38	0.13	0.48
Potri.001G041100	0.54	0.51	0.27	0.55	0.75	0.8	1.61	1.84	1.74	0.95	1.31	1.57	0.8	1.11	0.89	0.52	0.92	0.56
Potri.001G041400	0.79	0.68	0.18	5.24	4.7	5.34	2.4	3.57	2.9	2.61	2.56	4.81	2.14	2.02	1.39	0.91	0.66	1.08
Potri.001G041800	55.43	59.04	55.31	11.72	12.07	11.99	65.71	65.48	67.55	61.45	60.91	58.83	49.7	47.97	48.38	54.97	55.2	54.12
Potri.001G042600	449.13	434.02	441.93	3.18	3.67	2.61	541.28	542.94	551.3	268.18	277.12	278.12	404.28	412.43	403.79	516.38	490.19	493.85
Potri.001G042700	55.2	55.78	58.72	2.09	2.17	2.51	73.84	70.32	72.54	39.97	42.81	41.82	58.34	60.51	59.75	67.99	66.44	68.78
Potri.001G043000	66.71	71.26	68.4	33.48	33.14	30.81	78.38	77.68	77.43	101.91	105.38	106.55	49.58	50.79	49.41	59.88	55.85	56.88
Potri.001G043100	195.46	188.11	181.66	93.78	90.53	94.61	197.8	205.18	192.54	166.42	171.1	175	129.42	117.39	122.75	181.4	178.89	183.75
Potri.001G043500	4.05	3.99	3.59	1.91	1.91	1.81	3.21	2.84	3.13	3.43	3.65	4.19	5.1	4.96	4.08	3.97	3.93	4.01
Potri.001G043600	2.13	2.84	2.29	11.3	13.68	11.46	4.22	5.28	5.19	6.64	4	4.56	5.26	5.56	4.75	3.65	3.68	5.3
Potri.001G044500	12.28	12.11	12.95	2.73	3.41	3.23	10.62	12.25	9.98	8.41	7.66	7.42	15.56	17.13	16.61	33.82	39.4	36.53
Potri.001G046300	2.89	1.78	2.58	0.54	0.97	0.94	0.67	1.12	0.59	1.15	1.34	1.31	0.92	1.96	1.73	2.17	1.41	2.04
Potri.001G046800	3.21	3.12	3	7.65	7.03	6.53	3.04	1.59	1.77	1.83	2.85	2.08	2.8	2.45	2.25	3.03	2.64	2.05
Potri.001G047600	7.02	6.22	7.11	10.32	9.64	9.96	7.28	8.68	9.36	8.38	8.66	7.34	14.73	14.37	15.98	8.14	10.39	10.93
Potri.001G047800	1.75	1.39	1.16	7.59	8.47	6.69	2.28	2.32	3.38	1.84	1.63	1.72	2.27	2.84	2.88	1.86	0.96	2.22
Potri.001G048200	7.4	9.54	7.76	3.72	3.32	3.6	3.8	7.09	6.06	7.13	7.62	10.13	7.99	5.76	7.79	8.01	8.2	7.09
Potri.001G048900	0.48	0.53	0.72	1.58	1.63	1.71	0.42	0.39	0.45	0.57	0.59	0.56	0.76	1.04	0.9	0.8	0.83	0.73
Potri.001G049700	6.27	5.87	5.45	18.91	20.09	21.45	12.09	11.24	12.39	7.48	7.88	7.9	8.19	10.01	9.51	5.85	4.79	5.27
Potri.001G050300	0.41	0.46	0.49	2.88	2.93	2.88	0.7	0.47	0.69	0.3	0.24	0.69	0.42	0.77	0.67	0.39	0.25	0.29
Potri.001G051500	0.18	0.19	0.37	1.69	1.35	1.26	0.28	0.11	0.35	0.18	0.11	0.12	0.31	0.29	0.26	0.33	0.57	0.3
Potri.001G051600	0.91	0.73	0.72	3.6	3.48	3.5	1.16	1.44	0.89	0.47	0.23	0.53	1.27	1.32	1.49	0.99	0.99	1.14
Potri.001G052300	15.49	14.95	16.58	81.45	85.69	75.75	19.99	18.93	22.5	20.77	20.84	21.74	23.61	25.39	24.56	19.8	19.11	19.52
Potri.001G053000	0.18	0.13	0.09	1.16	0.92	1.11	0.46	0.39	0.46	0.46	0.24	0.56	0.27	0.45	0.21	0.22	0.29	0.31
Potri.001G054400	135.67	135.78	132.52	63.79	61.04	64.66	177.24	177.38	180.97	154.75	157.84	161.21	198.51	206.5	205.56	158.2	151.82	153.93
Potri.001G055000	0.09	0.17	0	2.53	3.41	3.93	0.97	0.21	0.15	0.29	0.05	0.14	0.25	0.08	0.44	0	0	0.09
Potri.001G055100	1.38	1.26	1.36	8.93	9.68	8.35	7.32	7.73	7.49	7.69	7.13	7.15	3.99	2.47	2.98	1.64	2.67	2.14
Potri.001G055200	0.83	0.57	1.19	1.54	1.4	1.46	2.13	2.41	2.28	3.14	3.3	2.79	1.9	1.03	2	1.09	1.29	0.97
Potri.001G055300	166.07	157.72	164.58	77.77	75.34	79.44	173.04	170.45	173.27	144.32	138.1	137.46	153.32	153.57	148.67	180.37	183.53	179.36
Potri.001G056200	9.81	6.92	7.15	17.12	17.92	17.56	4.83	6.43	5.04	7.55	6.92	6.72	11.37	10.89	11.49	7	6.56	8.11
Potri.001G056300	4.63	5.61	5.52	27.95	28.36	26.81	13.24	10.36	9.01	10	8.36	10.31	12.35	11.19	11.26	7.36	6.45	6.21
Potri.001G056800	72.42	69.24	68.95	31.32	30.04	28.17	65.27	67.46	64.25	82.87	78.48	79.56	63.41	59.92	59.17	61.54	63.35	64.93
Potri.001G057400	32.79	33.95	33.95	15.67	17.32	16.8	28.19	26.47	27.5	27.77	30.3	32	26.75	28.46	27.35	29.43	28.12	29.05
Potri.001G057700	12.77	11.42	14.17	11.92	14.53	16.28	4.24	6.23	3.91	3.86	4.2	3.18	2.79	4.19	3.26	8.48	9.67	6.48
Potri.001G057800	28.8	31.2	30.46	15.11	15.04	15.45	32.21	30.06	30.07	34.75	35.1	34.72	27.18	28.75	28.6	28.93	28.66	27.43
Potri.001G058100	32.45	32.78	30.71	16.45	16.85	15.75	27.9	26.64	30.67	34.47	32.54	34.36	24.41	21.1	23.6	31.23	31.91	31.16
Potri.001G058200	5.3	5.89	4.74	2.44	1.7	2.03	7.3	7.4	7.55	8.11	7.31	8.29	2.47	3.13	3.67	5.07	4.46	5.04
Potri.001G058300	0.15	0.19	0.21	0.04	0.06	0	1.2	0.75	0.76	0.63	0.9	0.84	0.18	0.05	0.13	0.03	0.09	0.15
Potri.001G058500	13.8	16.75	17.19	2.83	2.18	2.87	3.86	4.28	3.25	11.18	9.49	11.17	4.31	3.56	3.18	7.79	7.48	8.93
Potri.001G058900	0.61	0.68	0.58	0.1	0.12	0.03	0.03	0.1	0.11	0.46	0.27	0.16	0.3	0.19	0.36	0.11	0.12	0.13
Potri.001G059000	5.68	6.57	4.94	1.89	2.6	2.55	4.13	5.07	3.71	5.96	4.85	7.46	3.4	4.01	4.09	4.36	3.66	5.2
Potri.001G059100	13.43	14.73	14.75	37.61	37.64	37.07	19.28	20.24	18.23	20.89	15.77	19.05	22.61	21.3	20.8	15.78	14.51	12.38
Potri.001G059500	2.97	3.25	3.09	1.01	1.55	1.7	1.61	1.33	0.83	1.04	0.96	1.68	1.19	0.9	1.07	0.8	0.66	0.73
Potri.001G060400	10.68	11.68	10.66	6.21	4.71	5.4	6.74	7.19	6.52	9.8	9.08	9.57	14.39	15.29	15.94	13.92	13.71	12.68
Potri.001G060600	0.33	0.64	0.12	2.94	2.31	2.73	0.45	0.78	0.48	0.27	0.96	0.36	1.41	0.93	1.34	0.51	0.24	0
Potri.001G060900	1.29	1.63	1.51	0.05	0.13	0.04	0.09	0	0.07	0	0	0.19	0.13	0.2	0.23	0.46	0	0.26
Potri.001G061100	3.89	2.89	3.66	2.13	1.86	2.31	5.26	5.56	5.89	1.23	1.5	2.18	5.87	6.21	6.29	12.63	11.71	12.58
Potri.001G061600	10.08	7.63	10.2	27.44	25.02	24.2	12.48	12.51	13.12	8.79	8.89	7.3	9.1	9.55	7.76	8.04	6.83	6.77
Potri.001G061800	1.2	0.98	1.11	1.24	1.46	1.1	1.83	1.97	2.01	2.17	2.6	1.84	1.39	1.32	1.29	1.45	1.44	0.89
Potri.001G062600	3.87	4.16	3.53	1.02	1.11	1.18	2.88	3.01	3.95	3.56	3.65	4.11	4.17	4.2	4.8	3.54	4.3	3.07
Potri.001G062800	12.23	10.86	12.76	6	4.5	4.56	14.82	14.01	11.88	13.07	12.65	13.61	12.89	11.44	12.5	11.21	11.59	10.16
Potri.001G065200	1.85	1.7	1.82	0.26	0.44	1.24	1.44	0.69	1.58	0.36	0.97	0.9	0.87	1.01	0.97	1.36	0.97	2.11
Potri.001G065800	2.78	3.05	3.31	7.75	8.31	7.14	2.45	2.33	2.84	2.28	2.92	2.55	3.58	2.98	3.25	2.92	3.32	3.43
Potri.001G065900	3.4	3.79	3.63	7.22	7.47	8.63	2.96	2.56	2.09	2.85	3.44	3.46	2.88	3.94	3.5	3.43	2	4.18
Potri.001G066000	10.3	12.82	10.47	8.5	7.99	8.34	4.78	5.58	5.04	6.37	5.26	4.77	7.95	8.2	9.01	9.64	10.22	7.64
Potri.001G066100	3.06	3.06	2.91	1.87	1.35	1.47	1.82	2.11	1.91	1.99	2.04	2.17	3.41	2.88	3.31	3.32	3.31	2.35
Potri.001G067000	1.28	0.73	1.5	0.41	0.29	0.31	0.42	0.44	0.5	1.31	0.33	0.62	0.35	0.75	0.6	0.61	0.73	0.91
Potri.001G067600	3.86	4.82	4.28	0.97	1	1.6	1.23	0.97	1.32	1	1.94	2.05	1.26	1.33	1.42	4.34	5.06	4.97
Potri.001G068100	5.52	7.18	6.2	44.77	49.75	43.15	37.06	34.29	36.95	35.53	32.7	29.44	26.24	17.86	22.58	9.93	12.91	12.59
Potri.001G069000	2.39	2.08	1.93	0.22	0.22	0.11	0.32	0.44	0.22	0.2	0.26	0.23	0.5	0.73	0.96	0.34	0.17	0.24
Potri.001G069200	2.54	1.56	1.83	1.23	0.61	1.02	2.26	2.5	1.49	1.43	1.67	1.51	0.64	1.05	0.65	1.06	1.63	1.42
Potri.001G070300	13.07	12.75	12	4.5	4.9	6.55	7.36	7.73	6.69	8.35	8.58	9.55	6.15	6.73	6.39	7.38	9.62	8.97
Potri.001G070500	1.77	1.35	1.45	15.45	16.82	15.58	3.74	3.68	3.8	2.3	2.44	3.3	4.3	4.83	4.55	2.25	2.23	1.85
Potri.001G070700	10.31	10.14	10.34	1.9	1.86	1.3	6.06	7	6.18	7.73	6.96	7.25	5.76	6.04	5.45	9.77	9.8	9.28
Potri.001G071000	34.82	37.51	35.98	189.66	183.2	177.04	56.51	56.73	56.97	70.2	68.39	67.42	79.19	83.6	81.18	59.03	56.77	58.82
Potri.001G071400	0.44	0.48	0.19	1.01	0.94	1.38	1	0.63	0.79	0.29	0.42	0.43	0.52	0.32	0.34	0.53	0.48	0.66
Potri.001G074000	1.14	1.14	0.5	10.54	9.79	11.36	1.36	1.98	1.5	0.89	1.05	1.78	1.86	2.22	1.84	0.58	1.2	0.66
Potri.001G074300	0.38	0.56	0.52	0.37	0.44	0.03	2.13	1.03	1.62	1.83	2.05	2.5	0.93	0.64	0.54	0.48	0.37	0.36
Potri.001G074400	3.8	2.67	2.3	1.11	1.86	1.52	1.71	2.67	2.23	2.38	2.79	2.42	3.39	4.44	3.67	3.47	3.11	3.58
Potri.001G075200	0.39	1.44	1.45	3.1	3.82	1.17	3.05	3.19	3.78	1.4	1.49	2.43	2.93	3.07	2.26	2.85	2.07	1.7
Potri.001G075800	3.63	3.5	2.1	1.81	1.06	1.67	2.28	2.63	2.87	2.43	2.74	2.95	3.94	3.42	4.05	3.06	3.11	3.6
Potri.001G075900	7.25	7.98	7.09	3.77	3.36	4	6.24	5.29	5.11	5.36	7.15	6.66	6.19	8.23	6.83	7.7	7.72	7.14
Potri.001G076000	3.38	3.17	4.51	0.22	0.74	0.3	2.96	1.43	1.77	2.12	3.02	3.11	2.29	1.39	2.01	2.4	1.9	3.3
Potri.001G076100	5.69	6.32	5.55	1.5	2.21	2.22	5.14	3.97	4.66	5.77	6.42	5.79	4.17	5.45	6.63	6.33	6.25	3.96
Potri.001G076300	0.32	0.75	0.43	0.04	0.04	0	0.14	0.28	0.13	0.17	0.15	0.03	0.38	0.2	0.53	0.36	0.46	0.13
Potri.001G076500	1.7	0.99	1.43	0.85	0.82	0.51	0.57	0.46	0.37	0.33	0.52	0.5	0.43	0.62	0.53	1.31	0.95	0.9
Potri.001G077200	2.11	2.1	1.75	7.65	8.08	7.6	2.69	5.48	2.84	1.46	1.56	3.2	3.19	2.83	2.36	3.84	1.44	4.71
Potri.001G077300	2.74	2.64	2.88	5.18	7.42	7.24	1.43	1.76	2.01	2.26	0.82	2.42	1.79	2.28	2.23	4.04	3.52	4.39
Potri.001G077400	0.98	0.97	1.52	3.56	3.49	2.4	0.45	0.43	0.9	0.62	0.6	0.66	0.91	0.72	0.65	0.69	0.95	1.51
Potri.001G077600	24.26	25.53	23.57	84.69	78.29	85.74	32.55	34.98	34.06	24.84	24.77	26.73	22.73	21.74	21.71	26.97	24.53	25.28
Potri.001G078800	3.03	2.76	3.3	7.42	7.6	8	3.8	3.23	3.23	1.55	1.86	1.58	2.31	2.53	2.48	4.12	3.62	4.51
Potri.001G079500	36.47	35.87	37.31	11.52	10.76	11.46	28.82	28.02	30.65	43.16	44.7	40.4	18.93	21.62	23	25.01	24.75	28.5
Potri.001G079800	20.59	21.53	19.22	2.42	3.57	3.77	9.1	10.98	8.76	14.81	14.57	14.33	16.33	16.4	17.62	26.47	22.68	25.38
Potri.001G080000	1.56	2.26	2.35	0.25	0.91	0.11	2.02	1.45	1.02	0.88	0.69	0.91	1.7	1.12	1.01	1.2	1.4	1.53
Potri.001G080700	1.13	0.83	1.25	3.89	4.39	2.96	1.05	0.64	1.18	0.63	1.43	1.71	1.1	0.97	0.83	0.79	0.34	0.7
Potri.001G081100	2.39	3.49	2.86	2.38	2.58	2.85	1.52	1.33	1.51	1.42	0.93	1.17	3.5	2.89	3.17	3.15	2.75	3.99
Potri.001G081400	0.5	0.82	0.69	1.78	1.38	1.8	0.87	0.34	0.17	0.46	0.38	0.44	1.27	1.38	0.88	0.72	0.52	1.31
Potri.001G082100	65.06	64.01	68.32	35.91	34.29	34.01	68.59	65.22	60.54	68.15	73.26	74.46	60.66	62.82	62.33	63.69	65.26	66.32
Potri.001G082300	5	3.39	2.74	13.03	11.56	12.18	5.26	5.71	3.9	5.76	2.74	2.99	4.91	4.69	5.04	3.45	3.78	2.69
Potri.001G082500	2.25	3.15	1.93	0.71	0.7	1.02	2.32	2.76	2.22	2.09	2.01	2.58	2.52	3.06	2.79	2.37	1.9	2.37
Potri.001G082700	2.41	1.38	2.09	0.85	0.78	0.69	0.45	0.3	0.25	0.35	0.73	0.42	0.93	0.84	0.83	0.79	0.86	0.88
Potri.001G082900	1.52	1.77	1.79	1.23	0.84	0.58	0.79	1.05	0.98	1.48	1.45	0.97	0.87	0.93	0.64	1.06	0.86	0.96
Potri.001G083200	0	0	0	4.44	3.93	3.69	0.05	0	0.1	0.08	0.04	0.21	0.58	1.19	0.84	0.02	0.26	0
Potri.001G083300	20.07	21.53	20.68	23.39	24.37	26.75	8.23	9.41	8.95	12.72	11.4	11.14	18.34	17.39	19.12	17.55	18.42	17.43
Potri.001G083400	0.88	0.69	0.97	2.45	2.34	2.25	2.04	1.96	2.27	1.94	1.91	2.34	2.05	2.08	1.73	1.29	0.94	1.4
Potri.001G083700	3.1	2.49	1.88	2.77	3.26	3.51	1.81	1.62	1.45	1.08	0.54	0.53	1.14	1.11	1.22	1.64	1.36	1.61
Potri.001G084000	117.95	118.14	120.3	30.09	29.15	30.29	20.55	21.38	22.32	16.88	14.68	14.78	37.63	38.37	35.8	64.92	63.2	65.42
Potri.001G084200	2.15	2.63	3.35	19.05	23.44	21.8	11.05	10.3	11.17	8.56	8.61	7.47	8.2	7.41	7.49	2.97	4.3	4.09
Potri.001G084400	32.17	31.87	30.5	16.35	16.28	16.54	26.29	23.12	26.6	28.58	29.51	28.1	20.24	23.29	22.49	26.59	25.67	26.8
Potri.001G085100	5.75	5.16	6.48	14.81	14.36	11.49	7.97	8.27	7.15	8.1	8.31	8.29	10.86	9.68	9.27	9.64	9.02	8.59
Potri.001G085400	17.09	18.34	16.18	8.47	7.04	9.02	15.18	13.38	14.61	17.86	17.48	17.36	16.54	14.36	16.08	16.67	16.77	15.48
Potri.001G087100	5.35	7.17	6.62	6.66	6.33	6.57	1.95	2.32	1.68	2.54	2.61	3.22	6.55	7.03	6.55	6.82	5.98	6.75
Potri.001G087500	53.17	54.66	50.93	174.71	178.71	171.47	60.33	61.93	63.01	52.47	52.76	53.37	131.41	138.28	130.07	71.52	67.94	70.2
Potri.001G087700	3.63	3.54	4.74	8.71	7.98	8.51	6.54	8.99	8.57	5.45	4.27	5.06	4.71	5.08	7.04	4.92	4.43	5.34
Potri.001G087900	4.31	4.81	5.04	1.84	2.09	2.1	3.93	3.55	3.85	6.38	7.21	6.77	3.32	3.71	3.58	3.52	3.63	3.16
Potri.001G089000	0.27	0.16	0.15	1.75	1.16	2.22	0.78	0.57	0.46	0.81	0.71	0.87	0.38	1.13	0.41	0.24	0.47	0.11
Potri.001G090000	10.78	12.78	13.57	5.86	5.37	5.49	8.39	6.84	8.3	10.7	8.08	13.68	10.71	8.63	9.61	9.11	10.91	14.41
Potri.001G090200	1.17	1.18	0.75	0.23	0.13	0.36	0.53	0.69	0.48	0.84	0.84	1.04	2.11	1.45	2.52	1.09	1.36	0.98
Potri.001G090300	3.41	2.71	3.23	7.03	6.99	6.67	3.71	3.97	4.34	3.29	3.68	4.36	3.21	4.22	3.34	3.22	3.85	4.16
Potri.001G090400	2.35	2.21	2.75	6.14	5.77	5.43	2.88	3.86	2.84	2.26	1.59	2.05	4	3.75	3.35	2.94	2.57	2.78
Potri.001G092000	22.17	25.63	26.39	7.07	7.29	7.85	22.35	20	22.37	22.99	25.09	23	19.51	19.05	18.66	20.93	22.42	21.04
Potri.001G092100	1.32	1.26	1.53	0.65	0.8	0.8	0.29	0.38	0.11	0.13	0.27	0.73	0.61	0.4	0.19	0.46	0.74	0.78
Potri.001G092200	2.53	2.76	2.64	17.22	17.58	17.23	3.92	4.04	4.26	6.79	8.62	6.99	12.12	11.95	12.63	8.32	6.96	7.79
Potri.001G092600	6.88	7.58	7.34	3.98	3.13	3.19	4.72	5.3	4.96	5.42	5.17	4.71	5.81	5.69	6.05	7.3	7.83	7.79
Potri.001G092700	0.68	0.27	0.42	2.88	1.67	2.41	0.33	0.38	0.2	0.34	0.09	0.13	0.41	0.33	0.21	0.51	0.5	1.09
Potri.001G092800	1.9	2.33	1.96	5.23	6.87	5.45	2.22	2.55	2.15	1.29	2.75	1.33	2.31	2.76	3.35	1.87	2.19	2.67
Potri.001G092900	0.69	0.72	0.78	0.67	0.68	0.95	0.94	0.9	0.88	0.36	0.42	0.6	1	1.15	1.63	4.48	4.07	4.72
Potri.001G093100	2.87	2.94	3.97	9.6	10.07	11.35	4.85	5.61	4.92	2.75	2.58	2.83	2.69	2.16	2.16	2.96	3.63	3.56
Potri.001G093300	3.97	2.62	3.79	4.01	3.52	3.32	0.54	1.16	0.63	0.52	0.33	0.97	2.5	2.73	3.79	3.93	2.48	3.36
Potri.001G093500	0.99	1.74	1.5	0.61	0.49	0.07	0.67	0.29	1.33	0.46	0.53	0.42	0.53	0.49	0.73	1	0.85	1.17
Potri.001G093700	4.76	6	4.15	22.07	25.21	24.95	19.65	20.38	19.05	19.71	17.89	22.15	18.13	18.75	17.54	9.84	9.14	9.02
Potri.001G093900	3.4	4.08	3.8	1.85	2	1.86	2.45	2.39	3.18	3.1	3.37	3.35	3.26	2.99	3.17	3.23	3.17	2.69
Potri.001G094200	3.57	3.45	3.27	1.03	1.19	1.09	2.88	2.92	2.91	3.86	3.87	3.54	2.79	3.52	2.57	3.49	3.07	3.82
Potri.001G095200	2.64	2.36	3.26	7.99	8.73	8.85	3.76	3.23	3.8	2.97	4.53	3.28	3.14	4.19	4.06	2.36	3.14	3.08
Potri.001G096000	0.46	0.21	0.34	1.42	1.46	1.4	1	1.17	0.58	0.58	0.59	0.69	0.56	0.65	1.04	0.64	1.02	0.54
Potri.001G096600	0.75	1.31	1.24	3.69	4.2	4.04	2.32	2.41	3.25	2.51	2.26	3	2.32	1.65	1.67	1.73	1.31	1.78
Potri.001G096800	1.62	3.24	2.72	10.01	9.23	8.7	4.14	4.99	5.22	4.68	4.1	3.59	4.63	4.15	3.92	3.91	3.43	3.79
Potri.001G096900	0.34	0.41	0.59	10.17	9.85	9.12	3.45	3.31	5.26	2.43	1.54	1.51	0.65	0.25	0.92	0.75	0.92	0.46
Potri.001G097600	27.13	27.05	26.59	11	12.32	11.56	15.7	15.83	15	18.46	19.45	20.62	12.97	14.02	14.05	21.43	18.19	20.47
Potri.001G098300	0.75	0.49	1.04	2.53	2.71	2.75	1.54	1.44	1.3	1.3	0.87	0.72	1.42	1.75	1.66	0.78	0.95	0.64
Potri.001G099100	0.38	0.16	0.36	0.77	1.33	0.86	1.79	2.23	2.17	1.44	1.49	1.12	0.78	0.87	1.1	0.56	0.87	0.42
Potri.001G099200	42.97	41.24	38.44	12.94	10.18	12.55	40.94	47.2	40.16	42.96	46.58	45.38	35.34	36.82	33.07	34.97	34.9	39.57
Potri.001G099400	5.48	6.28	5.45	6.59	4.91	5.27	4.26	5.3	5.35	2.9	2.75	2.87	9.1	7.03	8.69	16.92	15.19	15.17
Potri.001G099600	13.29	12.37	13.48	35.78	36.3	32.97	8.34	8.97	7.83	10.69	10.09	8.94	14.33	14.49	15.43	12.69	12.85	13.26
Potri.001G099800	2.36	1.82	1.66	3.95	5.08	4.01	3.87	3.71	3.5	4.06	3.67	3.13	2.81	2.35	2.02	2.01	2.34	2.19
Potri.001G100000	12.17	10.88	11.87	65.53	65.67	66.3	9.18	9.96	8.28	9.63	8.83	8.4	38.86	38.8	36.84	16.62	15.56	16.59
Potri.001G100100	57.16	51.71	50.28	184.67	189.03	176.77	150.5	166.31	165.29	141.12	132.87	135.28	96.15	79.92	89.94	49.98	51.16	52.09
Potri.001G100500	2.79	2.42	1.7	5.08	5.23	3.63	3.44	4.71	6.03	2.44	4.78	3.09	3.32	4.53	3.01	3.57	3.02	3.7
Potri.001G100600	2.91	3.24	3.51	1.08	1.72	1.26	2.23	2.33	1.87	1.98	3.12	3.36	3.1	3.89	3.11	2.64	2.24	3.5
Potri.001G102000	35.21	29.96	35.84	17.39	12.99	15.3	37.21	37.32	28.33	30.59	31.94	32.98	31.99	37	32.82	36.04	35.43	38.39
Potri.001G102100	69.01	88.39	80.56	33.46	32.35	35.61	82.87	87.36	81.55	86.39	86.95	78.56	69.87	72.55	74.79	90.66	91.54	99.38
Potri.001G102200	11.24	12.32	11.76	5.95	6.59	6.14	10.39	12.09	13.65	11.9	12.12	10.44	8.58	8.62	8.92	12.97	13.04	12.73
Potri.001G102400	256.02	240.46	242.43	106.08	101.65	98.1	124.36	133.2	134.13	208.23	190.77	184.97	192.4	184.7	176.78	459.58	440.04	470.4
Potri.001G102500	1.23	1.73	1.28	0.34	0.22	0.2	0.92	0.9	0.99	0.85	0.7	0.83	1.1	0.87	1.19	1.12	1.06	1.13
Potri.001G102600	3.36	3.36	2.64	0.76	1.37	0.71	1.68	2.36	3.1	2.98	2.81	2.69	2.34	1.97	2.28	2.17	2.94	3
Potri.001G103300	17.3	17.81	16.03	9.13	8.52	8.98	8.23	8.07	8.66	9.85	10.58	10.64	17.47	19.39	18.62	12.92	12.27	14.33
Potri.001G104600	6.61	5.04	5.44	16.22	15.19	16.31	5.75	6.69	5.76	8.49	6.51	6.92	4.13	4.23	4.21	3.83	4.04	4.79
Potri.001G104800	8.86	10.98	7.89	3.61	3.53	4.1	5.03	6.46	5.59	7.09	7.26	8.08	8.86	9.06	8.67	7.81	7.43	9.12
Potri.001G104900	6.07	6.14	5.05	13.51	13.16	12.82	7.67	6.33	6.48	6.98	6.85	7.52	7.14	7.54	7.4	6.01	6.06	6.11
Potri.001G105900	16.29	18.29	17.48	24.56	26.26	22.88	18.35	18.15	18.24	17.17	15.49	16.34	24.57	22.33	23.05	36.53	38.28	37.29
Potri.001G106000	4.87	7.24	4.97	2.02	2.8	1.9	4.17	3.07	2.78	3.92	3.76	3.83	4.49	4.93	6	6.27	5.41	5.44
Potri.001G106100	3.38	4.06	3.74	21.24	23.32	18.6	24.97	25.26	25.38	29.13	29.01	28.32	9.05	8.96	8.04	4.2	6.29	5.3
Potri.001G106200	0	0	0	2.5	1.9	0.69	0.44	0.06	0.18	0.58	0	0	0.1	0	0	0	0	0
Potri.001G106700	0.52	0.59	0.93	0.76	0.93	1.23	0.31	0.34	0.34	0.8	0.57	0.72	0.56	0.99	0.87	0.67	0.49	0.41
Potri.001G107000	3.14	4.14	3.95	13.93	15.24	16.31	14.99	12.99	15.45	20.6	18.8	17.66	11.29	6.02	7.96	7.17	7.43	4.97
Potri.001G107600	19.43	19.46	20.25	37.3	42.88	41.41	63.66	67.67	65.93	60.52	59.38	58.75	36.85	33.29	31.89	37.74	39.74	45.44
Potri.001G107800	0.36	0.74	0.9	1.48	1.47	1.77	0.22	0.42	0.68	0.12	0.03	0.06	0.44	0.38	0.91	0.11	0.19	0.41
Potri.001G108100	62.2	62.32	61.21	21.16	22.07	19.76	92.38	93.48	92.76	83.05	76.76	77.19	49.03	47.6	48.24	60.24	63.85	62.76
Potri.001G108500	2.16	2.02	2.5	0.36	0.51	1.13	1	1.13	1.59	1.8	1.49	1.37	3.14	2.46	2.56	2.09	2.06	2.17
Potri.001G109000	0.96	1.16	1.23	0.23	0.54	0.67	0.87	0.47	0.78	0.83	1.07	1.01	1.43	1.46	0.94	1.6	1.5	1.68
Potri.001G109300	0.07	0.14	0.07	4.51	6.46	5.89	3.43	3.55	3.3	2.9	3.64	2.59	0.28	0.42	0.5	0.16	0.27	0.04
Potri.001G109400	0.51	0.85	0.42	4.66	4.49	4.43	1.79	1.62	1.17	1.26	1.59	1.07	1.91	1.85	1.82	1.17	1.11	0.86
Potri.001G109600	3.18	4.78	3.51	1.92	1.62	2.08	3.17	3.03	2.71	3.89	3.76	4.1	2.83	2.91	3.02	3.08	3.1	3.02
Potri.001G110700	0.62	0.68	0.26	0.07	0.06	0.03	0.72	0.47	0.93	0.53	0.28	0.53	0.26	0.46	0.49	1.27	1.31	2.23
Potri.001G110800	1.93	2.26	1.5	0.43	0.64	0	8.26	9.17	7.66	5.52	5.01	4.02	2.15	1.66	1.51	4.98	4.77	4.79
Potri.001G111600	1.66	1.44	1.92	2.23	2.08	1.94	0.84	1.11	1.22	0.41	0.48	0.31	0.85	1.01	0.62	1.71	1.65	1.48
Potri.001G111800	14.99	15.09	12.49	4.95	5.06	4.87	7.43	8.13	8.24	10.53	9.37	9.46	10.05	11	9.75	9.68	11.67	10.14
Potri.001G112800	0.75	0.49	0.17	2.53	3.56	3.7	1.87	2.11	1.37	0.29	1.25	0.73	1.21	0.79	1.79	1.01	1.38	0.96
Potri.001G113000	11.96	11.09	11.37	11.05	10.31	11.15	5.65	5.91	5.48	7.76	6.46	7.09	10.03	9.78	10.67	7.92	8.8	8.18
Potri.001G113100	8.3	7.09	7.68	51.28	49.36	48.63	22.14	23.62	23.24	10.96	10.13	9.49	27.04	25.36	24.92	7.86	7.69	7.44
Potri.001G113800	7.89	6.37	7.51	1.83	1.88	1.6	4.27	5.62	4.32	4.56	5.09	5.97	4.19	5	5.02	6.39	6.01	5.78
Potri.001G114300	0.92	0.64	1.24	0.12	0.13	0	0.2	0.11	0.6	0	0.11	0.58	0.42	0.71	0.62	0.96	0.49	0.99
Potri.001G114800	4.55	4.71	4.64	6.22	5.55	5.45	2.13	2.4	2.04	3.56	2.1	2.6	3.5	4.2	4.21	3.78	3.01	5.27
Potri.001G114900	3.52	3.23	2.45	4.23	4.41	2.78	6.64	6.88	6.01	5.63	4.92	4.63	4.4	1.84	1.96	3.18	2.79	3.34
Potri.001G115400	1	0.42	0.48	2.02	2.74	2.75	1.2	0.97	0.87	0.81	0.43	0.53	0.84	0.42	0.41	0.48	0.74	0.59
Potri.001G115600	2.61	3.06	2.9	8.36	10.26	9.44	7.52	7.93	9.39	7.35	6.86	5.98	5.11	4.54	5.84	4.36	4.26	4.02
Potri.001G116500	49.91	50.2	52.64	23.04	23.55	24.8	40.91	44.09	41.9	53.35	50.89	56.24	44.88	44.49	40.85	47.84	46.91	51.28
Potri.001G116800	2.21	2.77	2.01	3.82	3.35	3.91	0.85	1.15	0.88	1.06	1.4	1.35	1.75	2.51	1.96	1.89	2.18	2.06
Potri.001G117000	4.21	4.55	5.12	2.32	2.31	1.99	3.14	3.8	2.95	2.57	2.7	3.43	4.23	3.25	3.31	3.76	2.78	2.88
Potri.001G117200	22.72	25.14	27.08	13.01	12.94	12.49	18.59	20.01	20.52	20.54	20.51	22.11	20.29	22.29	21.41	20.68	22.42	23.44
Potri.001G118300	9.16	9.95	10.77	3.64	4.42	4.35	4.63	4.19	4.45	6.46	6.3	7.21	4.31	4.34	4.4	6.46	7.65	6.35
Potri.001G118600	7.59	8.11	8.41	3.21	4.45	3.43	7.06	7.98	9.24	8.64	7.51	6.12	8.19	7.64	7.71	9.36	6.88	7.06
Potri.001G119000	0.8	0.68	0.8	4.43	4.63	4.82	2.22	2.17	1.7	1.72	1.54	1.37	2.67	1.6	1.63	1.08	1.26	1.12
Potri.001G119100	14.16	12.61	13.24	20.24	18.93	20.37	7.09	6.44	6.08	6.4	5.79	7.15	11.58	10.43	10.23	10.35	12.84	12.92
Potri.001G119300	0.49	0.34	0.32	0.17	0.04	0.06	0.02	0.03	0	0.09	0.28	0.18	0.26	0.08	0.27	0.22	0.29	0.14
Potri.001G119500	251.79	260.58	258.95	93.95	89.27	91.38	392.8	386.87	392.74	297.73	302.45	299.91	245.3	245.38	240.65	280.97	275.97	279.33
Potri.001G120300	13.71	14.01	13.66	37.05	36.38	33.97	14.83	14.55	14.38	10.87	10.6	10.61	20.12	21.05	19.72	16.71	15.77	16.32
Potri.001G120900	4.27	5.73	6.08	14.44	13.83	14.35	4.65	5.26	4.7	4.04	4.11	4.18	6.89	6.5	7.94	5.12	6.36	5.52
Potri.001G121100	42.12	43.76	43.3	22.58	19.81	21.43	28.31	28.86	26.88	30.91	29.76	30.69	28.52	28.36	27.12	41.82	36.55	39.62
Potri.001G121400	5.33	4.6	5.87	11.59	11.33	11.14	5.75	5.58	5.77	7.39	6.43	6.62	7.3	7.73	7.98	4.68	6.11	5.67
Potri.001G121700	3.27	4.03	3.6	10.55	10.23	9.72	5.63	6.18	6.06	4.51	5.17	4.2	4.79	5.3	5.77	3.68	4.64	4.2
Potri.001G121900	0.39	0.33	0.09	1.69	1.83	1.33	1.16	0.46	0.6	0.34	0.36	0.11	0.81	0.63	0.77	0.28	0.68	0.63
Potri.001G122400	2.91	3.01	2.91	13.43	12.83	11.02	6.01	5.42	4.92	3.15	4.12	3.4	7.47	6.91	7.28	6.19	4.56	4.71
Potri.001G122600	5.07	3.85	4.22	4.49	5.16	3.55	3.59	2.48	3.81	6.85	9.64	10.02	8.31	7.72	9.42	6.98	6.53	5.72
Potri.001G123400	15.5	13.13	16.31	7.41	7.87	7.5	10.91	10.74	10.7	11.64	15.54	14.72	11.74	13.53	12.51	12.59	12.09	11.94
Potri.001G123700	10.51	12.08	11.05	5.31	4.63	4.97	7.9	8.05	6.79	8.16	8.35	8.57	8.14	9.43	8.83	9.22	9.52	10.35
Potri.001G123800	66.33	67.22	71.49	27.53	30.82	27.83	46.44	45.16	49.27	52.89	51.65	54.25	41.37	44.38	42.44	57.38	57.69	56.91
Potri.001G124200	31.85	30.59	31.79	28.78	27.47	27.5	19.25	18.34	19.32	12.4	13.47	13.83	40.31	44.2	39.73	30.91	31.7	33.15
Potri.001G124400	1.73	2.48	1.89	0.77	1.03	1.01	0.3	0.26	0.2	0.41	0.31	0.18	1.18	0.99	0.88	1.14	1.27	1.16
Potri.001G125200	37.3	40.04	38.33	19.64	19.01	17.99	37.86	34.17	32.69	32.32	34.02	34.23	40.05	40.94	42.2	42.02	42.76	40.64
Potri.001G126100	22.89	22.87	24.58	55.46	58.85	56.34	45.62	48.04	48.97	38.13	36.35	36.82	36.3	33.79	37.18	27.43	30.07	28.09
Potri.001G127000	2.42	2.84	2.28	6.97	7.3	7.19	3.71	2.62	2.79	2.6	2.57	2.77	2.7	2.96	2.25	2.78	3.39	2.71
Potri.001G127100	5.77	6.66	6.75	19.38	19.71	18.35	9.35	9.79	9.96	7.29	8.28	7.87	9.37	10.67	10.53	7.92	8.09	7.99
Potri.001G127600	1.4	1.35	1.42	1.8	1.46	1.1	0.58	0.64	0.65	1.13	1.26	1.37	1.16	1.18	0.85	1.08	1.18	0.82
Potri.001G127700	0	0.09	0	0.43	0.23	0.26	0.11	0.13	0.06	0.1	0.34	0	0	0.09	0.1	0.01	0.09	0.08
Potri.001G128100	1.17	1.2	1.35	5.1	5.57	4.65	2.63	2.41	2.4	2.37	2.07	1.81	2.5	1.62	1.95	1.58	1.35	1.67
Potri.001G128200	10.61	9.46	9.44	4.22	5.44	4.06	11.11	10.26	10.89	8.24	7.7	6.84	10.89	8.69	10.3	12.93	13.33	11.62
Potri.001G130700	0.67	0.72	0.55	3.74	3.48	3.25	1.69	1.43	2.52	0.83	1.24	1.13	0.97	1.34	0.6	1	1.39	1.4
Potri.001G130900	14.33	15.3	13.5	7.93	7.23	6.95	13.17	13.81	14.64	16.31	16.05	15.91	15.36	12.45	11.72	11.98	13.17	13.27
Potri.001G131500	0.45	0.46	0.45	1.4	1.25	1.15	0.54	1.19	0.86	0.24	0.4	0.96	0.68	1.41	1.18	0.47	0.41	0.57
Potri.001G133200	2.31	2.95	2.23	8.2	8.18	7.39	3.83	3.7	4.35	4.58	4.23	3.25	3.77	3.2	3.54	3.06	2.02	2.27
Potri.001G133800	9.3	9.44	10.31	26.3	26.02	27.28	10.04	10.15	10.68	8.88	9.21	9.84	16.04	16.72	14.41	10.42	9.15	10.5
Potri.001G134000	27.77	25.98	28.37	28.22	28.13	27.53	5.95	5.75	5.19	9.72	8.87	11.43	21.67	20.7	20.1	24.75	24.68	23.48
Potri.001G134100	14.5	11.91	13.38	30.2	30.25	28.32	17.09	16.6	17.31	14.74	15.03	13.4	16.72	16.61	17.59	15.01	15.23	15.87
Potri.001G134800	4.11	5.96	5.91	2.36	2.65	2.42	4.36	4.21	3.54	5.14	5.92	5.68	5.98	5.06	5.11	4.99	5.02	5.14
Potri.001G135100	3.39	2.75	2.71	9.46	8.9	10.4	6.28	9.53	5.89	6.83	6.26	3.3	3.18	3.14	3.73	3.36	3.08	3.83
Potri.001G136500	2.92	2.15	3.43	0.3	0.1	0.57	1.8	1.98	1.89	3.05	2.29	2.96	1.01	1.49	1.64	3.93	3.03	3.01
Potri.001G137400	9.26	7.24	8.51	1.94	1.82	1.9	3.99	3.68	4.31	5.58	6.02	6.2	4.18	4.78	4.45	5.81	5.09	5.58
Potri.001G138300	0	0.05	0	0.81	0.7	0.28	0.26	0.11	0.12	0.13	0.19	0.1	0.16	0.04	0.02	0.2	0.14	0.29
Potri.001G138800	0.19	0.15	0.09	0.72	0.53	0.44	0.83	0.56	0.36	0.89	0.4	0.78	0.81	0.18	0.65	0.19	0.28	0.32
Potri.001G138900	21.94	21.24	20.69	10.96	10.78	9.6	15.45	15.89	15.94	20.2	17.89	18.03	15.59	17.14	18.4	19.01	18.21	17.36
Potri.001G139000	2.38	3.38	2.88	1.03	0.84	1.43	0.92	0.85	1.17	1.61	1.55	1.76	1.13	1.35	1.5	1.35	1.65	2.31
Potri.001G139200	3.11	2.99	2.94	0.81	1.26	1.42	2.62	2.39	2.52	2.72	2.46	3	3.56	4.13	3.8	3.07	3.04	3.11
Potri.001G139300	4.28	4.77	4.66	1.53	1.75	1.59	5.53	6.93	5.78	7.62	7.61	7.2	6.57	6.22	5.89	5.42	4.56	4.55
Potri.001G139700	0.28	0.32	0.24	0.81	0.52	0.66	0.39	0.4	0.39	0.26	0.12	0.26	0.32	0.41	0.4	0.44	0.43	0.2
Potri.001G140400	0.58	0.44	0.43	0	0	0	0.22	0.06	0.22	0.23	0.24	0.37	0.22	0.47	0.21	0.43	0.43	0.21
Potri.001G140700	0.73	1.23	0.69	1.98	2.29	2.05	1.96	2.27	1.78	1.47	1.39	1.47	2.14	1.38	2.24	1.43	0.9	1.19
Potri.001G140900	0.14	0.04	0.17	0.47	1.05	0.52	0.35	0.58	0.71	0.29	0.38	0.42	0.43	0.11	0.29	0.04	0.1	0.17
Potri.001G141100	0.63	0.36	0.54	2.11	1.9	2.08	0.77	1.24	1	0.73	0.74	1.09	1.14	0.56	0.89	0.76	1.19	0.34
Potri.001G141200	3.01	1.9	2.86	6	5.95	6.2	3.01	3.11	2.99	2.67	3.41	2.94	2.8	3.18	2.68	3.58	2.69	3.53
Potri.001G141400	7.69	9.59	9.64	25.49	25.45	24.63	15.39	15.24	15.36	12.38	12.3	10.8	11.14	11.74	11.42	9.03	9.77	10.64
Potri.001G141500	72.34	75.11	78.75	30.89	31.99	32.89	79.67	82.7	79.69	74.17	75.03	77.21	67.96	68.77	68.41	89.36	89.87	89.44
Potri.001G141800	9.61	9.09	7.33	4.17	4.39	5.33	5.23	5.98	7.2	5.63	5.34	4.1	7.26	5.75	7.18	9.59	12.53	11.41
Potri.001G142000	0.32	0.49	0.44	2.15	2.18	2.08	0.66	0.97	0.54	0.42	0.37	0.71	0.57	0.4	0.88	0.29	0.55	0.26
Potri.001G142200	49.75	50.77	48.62	22.13	20.23	19.35	72.28	67.66	69.74	64.34	61.45	61.09	59.03	57.97	56.91	66.77	64.67	64.86
Potri.001G142500	1.04	1.3	1.81	6.52	6.28	5.87	1.65	1.58	1.6	1.28	1.37	1.44	1.91	2.05	1.02	1.87	0.86	1.02
Potri.001G142700	0.08	0.11	0.26	1.03	0.77	0.92	0.14	0.22	0.15	0.53	0.52	0.65	0.85	0.18	0.2	0.31	0.36	0.53
Potri.001G143700	2.08	1.55	2.03	0	0.05	0.04	0.1	0	0	0	0	0	0.03	0.14	0	0.15	0	0.15
Potri.001G144100	1.01	0.76	0.98	0.03	0.07	0.2	2.27	2.53	1.81	1.6	1.27	1.75	0.95	1.22	1.47	1.18	1.66	0.79
Potri.001G144800	1.08	1.5	1.65	0.88	0.81	0.76	0.13	0.25	0.2	0.15	0.16	0.1	0.34	0.18	0.49	0.39	0.28	0.77
Potri.001G145200	2.56	2.88	2.88	5.16	5.05	6.02	8.05	7.99	8.88	5.29	6.51	5.86	6.85	6.01	8.05	3.93	4.31	3.67
Potri.001G145700	9.49	8.53	8.86	3.67	3.11	3.74	8.6	8.47	8	9.94	10.67	10.25	7.26	7.27	7.22	8	8.31	9.75
Potri.001G147300	5.19	4.98	5.12	18.77	20.13	22.54	6.3	7.25	5.6	3.88	4.23	4.65	11.75	11.12	13.61	10.49	11.54	10.77
Potri.001G147600	1.12	0.91	1.24	0.63	0.97	0.67	0.44	0.37	0.65	1.05	1.38	0.37	0.4	0.48	0.35	1.34	1.66	2.05
Potri.001G147700	1.18	1.19	1.14	4.55	4.68	5.6	2.57	1.75	2.24	2.04	1.87	2.23	2.98	3.02	2.5	1.26	2.07	1.85
Potri.001G148200	26.94	32.38	30.21	13.82	13.3	14.08	20.48	21	20.29	32.61	34.67	29.5	21.17	25.52	21.74	25.4	24.85	27.75
Potri.001G149000	7.8	6.47	9.43	2.09	1.87	3.16	6.34	8.16	5.4	6.21	10.84	10.32	3.84	5.51	5.01	4.01	5.15	3.29
Potri.001G150800	1.55	2.21	2.21	0.81	0.83	0.78	1.34	0.72	0.79	1.32	1.34	2.17	1.03	1.35	1.12	1.33	2.27	2.27
Potri.001G151900	0.27	0.21	0.19	2.55	2.01	1.65	0.35	0.64	0.5	0.34	0.56	0.32	0.7	0.33	0.5	0.24	0.22	0.48
Potri.001G152500	1.12	1.36	1.08	5.25	4.54	5.85	2.84	3.66	2.86	3.01	2.62	1.7	4.18	3.92	4.33	1.25	1.12	1.06
Potri.001G152600	5.73	6.88	5.67	5.67	6	5.95	1.63	2.43	2.09	2.35	2.58	2.42	3.64	4.07	4.55	4.39	4.23	4.38
Potri.001G153100	1.51	1.08	1.07	0.5	0.35	0.55	1.64	1.16	1.4	0.44	0.49	1	2.73	2.77	2.33	2.04	2.52	1.91
Potri.001G154100	7.94	8.91	10.79	3.79	2.65	2.24	9.97	8.6	10.07	8.97	8.01	8.52	11.72	12.04	12.84	18.59	19.91	19.91
Potri.001G154200	99.61	106.52	95.84	29.3	29.51	29.51	94.31	94.07	92.81	69.5	66.4	70.74	105.69	106.39	108.91	143.35	141.64	144.79
Potri.001G154500	1.53	1.53	1.48	3.3	3.09	4.15	2.68	1.46	2.64	2.43	2.57	1.63	2.52	3.07	1.94	2.23	2.94	2.19
Potri.001G155700	1.38	1.47	1.25	0.81	0.51	0.81	1.52	1.33	1.01	1.17	1.19	0.54	0.36	0.58	0.47	0.93	0.46	1.16
Potri.001G156000	14.19	13.74	14.7	6.77	6.71	7.36	11.21	11.31	10.16	13.09	12.38	12.79	11.83	12.62	11.96	13.29	13.08	14.1
Potri.001G156200	0.4	0.36	0.22	1.02	0.86	1.05	0.29	0.36	0.27	0.49	0.4	0.62	0.62	0.63	0.42	0.52	0.63	0.65
Potri.001G156700	0.49	0.85	0.82	0.43	0.36	0.26	0.25	0.66	0.55	0.43	0.31	0.64	0.42	0.41	0.54	0.61	0.81	0.75
Potri.001G157700	2.97	2.43	2.94	8.77	8.23	7.23	3.36	5.37	3.52	3.46	3.59	1.94	3.38	4.22	5	2.13	3.93	4.36
Potri.001G158000	1.98	1.96	1.76	3.99	4.25	3.58	3.17	3.84	3.14	2.66	2.6	2.81	2.87	2.62	2.53	4.6	4.17	4.23
Potri.001G158100	6.09	8.5	6.34	7.48	7.3	9.59	3.71	3.56	4.82	3.1	3.82	3.68	3.31	3.71	3.21	7.18	8.68	7.2
Potri.001G158400	4.18	3.39	3.37	139.54	142.09	134.41	6.22	6.53	5.99	2.93	3.61	4.24	13.88	14.36	15.74	3.82	3.98	4.11
Potri.001G158600	12.44	11.86	13.3	0.11	0.22	0.48	8.71	8.63	9.48	9.06	9.22	8.49	5.06	6.21	5.07	7.72	9.41	9.08
Potri.001G158700	1.84	1.62	1.62	0.99	0.62	1.59	0.58	0.57	0.77	0.4	0.59	0.35	0.49	0.52	0.45	0.6	0.41	0.47
Potri.001G158900	15.35	14.33	13.74	42.3	43.12	39.75	27.82	29.27	28.2	22.27	21.73	22.23	21.38	21.9	23.27	16.42	18.04	16.49
Potri.001G159300	1.42	1.64	2.63	4.25	2.94	2.06	2.98	3.29	3.57	4.26	3.23	4.46	3.57	3.29	4.16	2.13	2.65	3.23
Potri.001G159900	0	0	0.12	0.41	0.89	0.42	0.23	0.07	0.31	0	0.05	0.02	0	0	0	0.03	0.02	0
Potri.001G160100	33.73	37.46	34.75	15.55	14.84	13.9	24.15	25.89	23.67	28.02	25.3	27.24	28.43	28.74	29.69	34.52	37.19	34.34
Potri.001G160400	1.32	1.52	1.51	2.44	2.39	2.24	0.75	0.78	0.55	0.7	0.77	0.91	1.29	1.24	1.08	0.98	0.8	1.08
Potri.001G161400	5.68	5.94	6.69	16.98	19.23	19.58	4.86	5.59	5.28	4.83	5.62	5.42	8.53	9.04	9.12	6.12	6.23	5.41
Potri.001G162100	1.08	1.59	0.97	18.9	16.46	17.29	5.31	4.65	3.73	2.21	2.23	2.74	2.43	2.91	3.08	2.05	3.18	2.96
Potri.001G162400	10.28	9.61	9.86	61.63	58.66	56.97	23.13	20.49	20.74	18.25	18.39	18.96	17.46	17.06	18.63	13.51	14.38	13.88
Potri.001G162500	3.19	2.54	2.64	20.05	24.08	22.89	9.7	9.85	10.02	4.25	2.77	3.47	3.62	4.72	5.16	6.18	5.94	7.26
Potri.001G162600	1.57	1.46	1.59	13.55	14.85	15.08	6.54	5.95	6.39	1.67	2.23	2.26	2.71	2.6	3.08	3.88	3.89	4.39
Potri.001G163400	1.45	0.93	0.61	0.88	1.3	0.88	5.58	5.51	6.39	2.25	2.07	1.17	2.99	3.2	3.28	1.04	0.96	0.78
Potri.001G163600	16.5	16.42	16.18	26.36	26.22	26.91	32.37	31.16	32.76	28.82	28.09	29.42	40.02	41.92	39.74	18.04	19.5	19.36
Potri.001G164700	118.86	120.07	115.27	9.62	11.47	10.63	159.12	161.48	157.68	173.96	171.58	175.78	118.63	118.72	122.27	107.82	105.55	110.17
Potri.001G166200	0.41	0.55	0.33	0.57	0.24	0.22	2.33	4.09	2.56	0.71	0.68	0.83	0.9	1.33	1.22	1.66	1.04	1.24
Potri.001G166500	6.09	6.16	6.01	12.8	13.66	13.34	6.34	4.72	5.91	5.18	6.17	6.87	8.7	9.25	7.93	6.59	6.4	6.38
Potri.001G167100	117.34	119.89	114.52	36.78	35.48	35.13	82.42	88.71	81.08	100.39	100.92	100.6	57.18	57.72	56.03	97.24	98.64	100.91
Potri.001G167600	3.62	3.76	3.58	2.02	3.28	3.11	1.54	1.77	2.64	2.48	1.74	2.89	1.19	1.73	2.27	2.92	3.22	2.04
Potri.001G167800	24	21.78	20.75	106.04	109.6	111.73	27.32	28.07	24.61	13.47	11.16	12.19	53.57	58.74	53.7	20.17	20.05	20.77
Potri.001G168100	5.71	5.62	5.95	2.28	1.77	2.1	2.44	1.75	2.41	3.05	3.41	2.85	3.19	3.5	3.41	4.43	4.03	3.44
Potri.001G168600	0.2	0.41	0.35	1.01	0.68	0.83	0.42	0.66	0.67	0.41	0.62	0.32	0.38	0.2	0.27	0.18	0.37	0.28
Potri.001G169000	0.48	0.42	0.47	0.45	0.37	0.18	0.02	0	0	0	0.03	0.18	0.2	0.16	0.39	0.24	0.14	0.15
Potri.001G169100	0.37	0.24	0.3	1.22	1.15	1.45	0.66	1.29	0.6	0.1	0.88	0.52	0.6	0.57	0.54	0.27	0.18	0.43
Potri.001G170200	21.55	23.18	22.36	11.44	12.11	11.49	22.78	24.45	23.1	25.65	26.63	28.21	20.24	22.19	21.63	19.95	19.06	21.96
Potri.001G171200	17.43	18.49	15.83	40.28	40.1	36.6	19.5	18.07	17.09	14.34	17.41	14.8	23.86	26.67	26.2	22.07	22.11	17.08
Potri.001G171300	1.37	1.39	1.37	0.29	0.37	0.63	0.44	0.83	0.63	0.86	1.22	1.44	1.02	1.11	1.3	0.97	0.94	1.2
Potri.001G171600	6.74	7.88	6.6	0.53	0.58	0.45	0.38	0.42	0.61	0.17	0.11	0.24	1.25	0.78	0.78	2	2.19	2.32
Potri.001G172100	33.59	30.53	33	13.37	13.68	13.99	27.47	28.41	26.8	28.44	31.32	29.37	25.84	26.21	26.4	30.75	34.4	32.9
Potri.001G172700	5.91	5.79	5.33	23.71	21.75	23.55	8.11	7.27	9.34	10.24	9.7	10.32	10.73	10.63	10.56	10.27	8.96	9.13
Potri.001G173300	1.56	1.75	1.58	0.73	0.81	0.84	1.1	1.56	1.26	1.27	1.58	1.9	2.31	1.93	2.02	1.89	1.87	3.07
Potri.001G173900	35.79	37.29	36.44	19.43	17.72	18.41	34.3	31.32	33.03	41.03	48.48	45.16	26.4	26.72	23.92	30.04	28.85	33.35
Potri.001G174000	25.77	29.07	27.71	11.13	12.25	12.59	28.41	29.14	28.12	39.3	39.79	38.35	17.28	19.98	20.27	20.9	21.6	21.01
Potri.001G174400	0.18	0.53	0.29	2.34	1.32	1.51	0.12	0.11	0.09	1.83	1.41	1.55	1.96	1.35	2.51	2.1	2.86	2.21
Potri.001G174500	0.54	0.94	0.64	0.05	0.18	0.16	0.4	0.53	0.25	0.59	0.28	0.69	0.19	0.19	0.39	0.31	0.28	0.51
Potri.001G175500	0.47	0.63	0.6	2.54	3.35	3.13	0.73	1.41	1.17	0.67	0.93	0.99	0.94	1.25	0.72	0.88	0.41	0.89
Potri.001G175700	0.43	0.47	0.51	1.22	1.09	1.2	0.53	0.53	0.65	0.63	0.34	0.74	0.32	0.45	0.45	0.49	0.5	0.62
Potri.001G176500	0.94	0.62	0.94	0.03	0.07	0.04	0.06	0	0	0.07	0	0	0	0	0	0.09	0	0
Potri.001G177100	0.72	0.57	0.67	4.59	3.37	4.61	2.91	2.64	2.93	1.44	1.51	2.4	1.81	1.86	1.68	0.66	0.59	0.85
Potri.001G177200	4	4.33	3.9	2.03	1.94	1.1	3.36	3.27	2.65	4.3	3.83	3.68	3.92	3.6	4.25	4.32	3.63	3.86
Potri.001G177300	10.12	9.66	10.03	4.87	4.21	4.79	7.71	7.62	7.22	9.69	9.34	8.86	7.48	6.25	7.68	7.16	6.93	8.38
Potri.001G177400	32.38	30.01	33.34	79.54	71.39	75.51	50.04	46.68	48.99	45.23	46.19	45.21	49.61	44.65	46.36	51.49	48.11	47.9
Potri.001G177500	1.6	0.88	1.41	6.6	7.75	8.43	2.53	2.94	3.26	2.73	1.8	2.55	3.33	3.05	2.85	2.59	2.54	2.56
Potri.001G177900	0.08	0	0	0.35	0.38	0.83	0.28	0.34	0.85	0.53	0.45	0.22	0.56	0.63	0.3	0	0	0.05
Potri.001G178300	12.24	15.42	13.87	2.72	3.53	3.34	10.5	10.77	10.75	16.72	15.19	13.28	9.14	7.49	7.13	13.81	11.5	12.23
Potri.001G178500	0	0.02	0.03	0.46	0.59	0.39	0.53	0.71	0.8	0.1	0.4	0.55	0.15	0.19	0.27	0.02	0	0.09
Potri.001G178700	6.1	4.07	5.56	2.63	1.77	1.98	2.82	3.47	4.34	4.35	5.37	4.75	3.53	3.27	3.61	3.72	3.02	5.09
Potri.001G180600	0.14	0.42	0.36	0.83	1.25	0.78	0.91	0.8	0.43	0.77	0.69	0.15	0.28	0.23	0.02	0.2	0.37	0.61
Potri.001G181300	0.85	0.79	1.08	1.89	1.79	1.75	1.08	0.91	1.38	1	0.56	0.76	0.36	0.56	0.45	0.76	0.82	0.78
Potri.001G182100	39.57	38.11	39.52	11.58	13.65	10.85	61.96	58.61	60.86	41.84	41.78	41.74	49.93	49.43	49.7	52.03	49.34	48.49
Potri.001G182500	1.22	1.74	0.94	2.49	3.02	4.92	3.35	2.69	2.93	2.54	2.12	1.86	2.53	1.98	3.08	1.6	2.28	2.44
Potri.001G184200	6.51	4.33	4.02	1.15	1.67	1.17	4.31	3.61	4.91	3.97	3.42	3.99	3.36	3.52	3.96	3.57	3.47	4.02
Potri.001G186400	1.98	1.34	2.43	0.62	1.13	0.42	1.39	0.83	1.04	2.43	0.96	1.57	1.67	2.31	1.27	1.23	0.99	1.59
Potri.001G186500	2.76	3.85	4.59	1.65	1.6	1.63	2.93	3.78	3.25	3.49	3.51	4.19	4.19	5.22	4.87	3.63	4.04	3.78
Potri.001G187100	2.47	2.19	1.71	6.63	5.06	5.87	2.4	2.85	2.12	1.32	2.54	1.44	2.43	2.36	2.83	2.64	2.65	2.22
Potri.001G187500	0.21	0.09	0.25	1.4	1.99	2.52	0.97	1.43	0.93	1.06	1.13	0.96	1.06	0.72	1.3	0.76	0.32	0.48
Potri.001G188500	0.69	0.07	0.47	1.57	1.32	1.2	0.56	0.78	0.73	0.59	0.26	0.32	0.46	0.48	0.2	0.25	0.45	0.65
Potri.001G189400	1.31	2.18	1.66	5.21	4.12	4.37	2.65	2.76	3	2.4	1.33	2.31	2.78	3.03	2.82	3	3.19	3.91
Potri.001G190800	5.21	4.79	4.11	13.03	11.46	10.46	4.49	3.25	3.6	3.69	2.76	3.26	5.07	4.06	4.08	4.6	4.26	4.08
Potri.001G191600	1.23	1.61	1.45	0.76	0.83	0.68	0.67	0.75	0.5	0.86	0.65	0.6	0.22	0.71	0.57	0.43	0.25	0.34
Potri.001G191800	2.98	3.46	3.15	0.68	1.02	0.97	2.94	2.38	1.97	2.75	1.78	3.07	3.17	2.99	3.31	3.36	3.71	2.95
Potri.001G192300	7.89	9.95	6.5	3.95	4.09	3.23	7.56	5.82	5.36	6.19	6.13	4.64	5.8	5.67	7.73	5.56	6.64	4
Potri.001G192400	7.72	5.84	8.76	3.2	2.8	3.35	4.64	4.25	5.95	4.56	6.78	5.5	7.1	5.89	7.69	7.85	5.98	5.02
Potri.001G192600	130.54	123.57	125.76	2.13	2.48	2.23	101.48	107.9	100.98	73.08	76.07	69.09	71.77	69.25	67.78	107.77	102.74	104.61
Potri.001G192800	6.59	4	6.7	2.95	2.8	2.04	3.03	3.81	3.61	2.77	1.64	1.89	3.41	4.53	3.91	6.34	6.64	8.53
Potri.001G193200	0.6	1.47	0.59	0.03	0.11	0.04	1.37	0.7	1.31	1.16	0.96	1.45	1.5	0.48	0.89	0.67	0.12	0.4
Potri.001G193500	62.37	69.17	69.19	27.76	24.52	28.33	73.23	81.37	76.4	65.83	58.09	53.29	59.87	57.4	62.95	72.22	78.88	70.18
Potri.001G198900	1.15	1.14	0.79	2.34	2.66	2.76	3.24	3.74	3.36	1.74	1.42	2.59	3.47	3.06	3.42	2.8	3.03	3.28
Potri.001G199200	18.69	19.16	20.82	9.3	9.79	10.19	16.02	15.3	14.88	17.43	19.15	20.2	15.55	17.27	15.86	15.95	15.93	16.04
Potri.001G200700	0.16	0.13	0.14	1.01	1	0.41	0.33	0.24	0.24	0.05	0.16	0.29	0.17	0.17	0.18	0.17	0.11	0.39
Potri.001G201500	9.9	10.86	11.93	16.66	14.64	15.69	3.71	2.48	3.64	6.29	4.75	6.01	7	6.88	6.73	8.51	8.11	8.32
Potri.001G201700	4.86	5.21	5.97	11.53	12.4	13.81	4.83	4.14	3.64	2.99	3.96	4.67	5.9	5.36	5.87	5.73	4.7	5.41
Potri.001G202100	4.92	5.79	5.21	0.19	0.82	0.32	2.12	1.58	1.35	1.43	2.04	1.88	2.53	2.82	2.5	0.72	0.91	0.94
Potri.001G204100	1.59	1.3	1.72	4.12	4.74	4.57	1.6	2.28	1.96	2.3	1.26	2.2	2.01	1.94	2.22	1.69	1.75	0.82
Potri.001G205800	68.66	67.79	69.66	37.54	36.63	35.14	38.37	39.06	39.82	30.96	33.56	31.65	41.59	43.65	45.08	61.22	60.06	58.95
Potri.001G205900	2.74	2.19	2.55	1.47	2.02	1.76	0.94	1.23	1.24	1.04	0.84	0.73	1.1	0.87	1.07	1.73	1.34	1.96
Potri.001G206800	1.96	1.74	1.65	10.39	10.11	9.86	2.21	2.2	2.09	1.6	1.73	1.37	2.46	2.8	2.52	1.78	1.64	1.62
Potri.001G206900	6.19	7.08	7.57	1.76	2.02	1.37	3.68	3.58	4.38	5.42	5.05	4.49	1.47	1.91	1.7	3.14	2.94	2.99
Potri.001G207000	98.62	90.24	98.31	31.35	29	29.07	69.19	66.28	67.93	80.09	78.96	81.58	105.52	104.03	102.61	103.68	99.88	96.09
Potri.001G207200	60.49	72.43	65.33	24.22	25.41	26.48	61.05	61.84	60.6	81.27	74.27	77.45	44.4	49.92	51.74	50.49	47.54	60.31
Potri.001G208700	3.48	2.95	2.93	9.17	9.21	8.28	3.74	3.36	4.06	4.28	3.12	3.25	3.94	3.54	4.14	4.15	3.44	4.56
Potri.001G209300	8.73	6.41	6.22	27.04	25.01	27.73	8.21	6.99	7.42	7.24	7.31	4.67	5.92	6.42	6.3	5.92	5.8	8.53
Potri.001G209800	32.28	33.72	36.61	17.38	18.47	17.31	35.77	38.02	39.68	51.69	51.29	52.94	33.85	34.09	32.37	33.59	34.3	30.65
Potri.001G210400	1.34	1.3	0.98	2.69	2.45	2.78	2.06	2.42	2.99	1.76	1.89	1.7	2.2	2.04	1.58	2.36	2.59	1.65
Potri.001G210800	0.3	0.51	0.49	2.01	1.5	2.04	0.68	1.01	0.91	1.46	0.8	0.78	1.34	0.58	0.34	0.7	0.18	0.55
Potri.001G211000	32.25	31.62	31.53	16.3	15.87	17.34	24.46	25.51	23.58	31.84	32.39	32.68	20.52	23.2	22.15	24.91	24.81	24.88
Potri.001G211400	0.64	1.24	0.84	0.08	0.28	0.18	0.6	0.66	0.34	0.4	0.91	0.45	0.56	0.59	1.12	0.45	0.38	0.42
Potri.001G212100	2.2	2.26	2.63	1.06	1.27	0.6	1.54	3.83	1.86	1.15	1.31	1.29	2.4	2.57	2.73	1.87	1.16	2.93
Potri.001G213300	0.82	0.62	0.6	1.85	2.04	1.47	1.51	1.45	1.36	0.9	0.72	1.53	1.44	1.2	0.92	0.88	2.49	1.23
Potri.001G213500	0.17	0.27	0.54	1.11	1.25	1.32	0.68	0.88	0.5	0.61	0.35	0.49	0.96	0.56	0.93	0.89	0.55	1.12
Potri.001G215100	5.17	4.08	3.64	2.43	1.58	1.55	5.24	3.37	4.23	4.31	4.57	6.62	3.78	3.25	3.26	4.44	3.9	3.9
Potri.001G217600	3.9	2.85	3.67	1.91	1.82	1.45	2.06	2.05	2.3	2.05	2.35	2.69	3.55	3.71	3.94	3.5	2.82	3.21
Potri.001G218800	2.03	2.31	2.8	0.58	0.6	0.68	3.83	2.4	3.52	2.93	2.69	3.3	2.35	2.28	2.94	2.87	3.55	2.59
Potri.001G218900	1.47	1.29	2.03	0.37	0.61	0.51	2.24	2.69	1.04	1.96	2.02	2.49	1.08	0.95	0.77	0.84	1.17	0.74
Potri.001G219100	5.85	4.21	5.47	0.56	0.87	0.87	4.28	3.07	3.7	7.45	6.5	7.44	2.51	1.92	1.8	4.07	4.07	3.27
Potri.001G219200	47.88	48.61	46.05	23.81	23.17	23.7	39.9	43.23	40.95	56.05	53.76	50.47	43.65	38.51	37.52	45.51	50.59	47.99
Potri.001G219600	0.71	1.28	0.53	0.48	0.53	0.45	1.92	1.5	1.51	2.6	2.18	1.42	0.98	1.32	0.59	1.25	1.46	0.67
Potri.001G220800	55.85	53.57	56.32	24.8	22.53	20.74	50.77	52.55	55.88	54.09	53.1	52.15	32.74	29.7	33.68	46.53	48.15	49.41
Potri.001G220900	0.64	1.57	0.85	27.08	23.98	23.06	7.68	5.76	4.87	2.65	2.89	2.57	14.12	16.23	14.31	3.02	2.48	2.53
Potri.001G221700	0.04	0	0	1.16	0.89	0.88	0.78	0.81	0.98	0.23	0.17	0.12	0.31	0.44	0.13	0	0.1	0
Potri.001G222900	1.16	0.8	0.99	0	0	0.04	0	0	0	0.11	0	0	0.02	0.05	0.09	0.4	0.48	0.12
Potri.001G224400	3.74	3.16	3.3	1.48	2.22	1.74	2.37	2.33	2.81	2.98	3.17	3.09	2.7	4.11	2.8	3.28	4.04	3.95
Potri.001G224800	1.82	2.01	1.57	0.49	0.4	0.39	2.36	2.31	2.1	2.97	2.86	1.93	1.52	1.37	1.84	1.75	1.85	1.54
Potri.001G224900	28.42	31.95	27.92	11.45	11.32	10.37	21.68	18.96	21.5	30.77	30.7	30	20.9	22.38	23.8	22.37	23.51	25.02
Potri.001G225000	31.06	26.29	30.5	12.61	10.93	11.79	23.1	20.34	21.62	27.69	30.22	30.63	20.17	25.04	23.99	25.2	25.4	22.8
Potri.001G225400	3.35	2.6	3.19	1.52	0.51	1.1	1.27	1.27	1.19	1.65	1.47	1.71	1.5	1.62	1.77	2	1.95	1.42
Potri.001G225500	19.75	19.56	18.84	40.99	41.87	43.96	23.84	21.88	22.57	15.26	16.36	15.74	24.58	26.24	22.82	24.76	24.34	21.08
Potri.001G225600	0.11	0.18	0.05	1.9	1.69	1.87	0.38	0.45	0.34	0.43	0.18	0.38	0.22	0.41	0.29	0.12	0.22	0.29
Potri.001G225700	2.43	2.1	2.13	4.32	4.17	3.87	2.34	3.8	3.28	2.96	3	3.07	6.03	6.67	6.6	3.59	2.69	2.47
Potri.001G225900	3.23	2.4	2.93	0.67	0.62	0.95	0.32	0.42	0.67	0.43	0.24	0.34	0.48	0.56	0.5	0.56	0.3	0.16
Potri.001G226100	7.31	8.64	7.97	0.93	2.3	2.02	0.87	0.63	2.88	0.77	1.02	0.5	0.93	1.44	1.34	1.72	1.1	1.56
Potri.001G226900	6.56	7.09	6.33	17.57	17.61	15.69	6.42	5.84	6	6.33	5.62	6.21	10.89	10.13	9.12	8.14	9.95	7.15
Potri.001G227000	7.18	6.81	6.14	19.46	18.56	20.56	17.35	17.02	15.9	14.06	13.9	13.28	12.71	11.3	12.04	10.97	12.43	9.91
Potri.001G227300	1.22	2.17	1.88	1.2	1.22	0.65	1.62	1.5	1.87	1.95	1.49	1.73	1.41	1.31	1.53	0.76	0.24	0.44
Potri.001G227400	8.15	6.24	4.75	6.12	5.37	5.07	8.25	7.37	8.09	4.84	5.35	4.87	6.09	5.33	5.99	1.33	2.17	1.99
Potri.001G227800	5.16	6.82	6.98	3.07	3.03	2.83	6.6	6.4	5.28	5.88	7.29	5.24	6.68	7.79	7.45	7.79	6.96	8.76
Potri.001G228200	0.67	0.65	0.74	0.29	0.31	0.2	0.95	1.47	1.03	0.75	1.17	1.36	1.05	0.84	0.63	1.24	1.3	1.55
Potri.001G230700	0.76	0.94	0.88	0.33	0.14	0.05	0.49	0.39	0.21	0.59	1.07	0.64	0.6	0.82	0.83	0.75	0.5	0.62
Potri.001G231000	4.81	6.49	6.03	13.75	14.53	15.29	11.66	10.59	11.77	8.84	9.81	9.65	8.46	6.58	7.23	5.42	6.34	6.36
Potri.001G231600	0.48	0.29	0.33	1.64	2.02	2.19	1.92	1.96	1.58	2.07	1.41	1.79	1.24	0.76	1.18	0.3	0.46	0.3
Potri.001G231900	0.21	0.33	0.15	0.75	0.56	1.17	0.68	0.36	0.68	0.72	0.71	0.54	0.7	0.29	0.35	0.55	0.49	0.11
Potri.001G232200	0	0.25	0.18	0.95	1.08	0.9	0.5	0.54	0.54	0.46	0.34	0.81	0.65	0.3	0.35	0.18	0.16	0.16
Potri.001G232900	2.37	2.68	3.03	20.09	16.83	19.29	4.54	5.03	4.61	5.54	4.35	3.37	6.68	6.7	5.56	2.9	3.5	2.87
Potri.001G233600	0.62	0.9	0.84	2.37	3.82	3.15	1.4	1.25	2.66	1.2	0.41	1.1	0.46	1.11	0.56	2.1	1.24	1.12
Potri.001G233700	15.09	14.54	13.93	32.95	33.36	35.78	14.02	15.36	14.97	13.38	14.49	14.06	18.14	18.75	19.11	14.69	14.55	14.2
Potri.001G234500	0.62	0.24	0.37	3.37	3.23	3	1.18	1.06	1.02	0.35	0.3	0.26	0.66	0.79	1.07	0.49	0.33	0.41
Potri.001G234600	9.33	9.01	8.81	2.34	2.66	2.6	8.49	8.14	8.88	6.45	5.92	6.04	8.27	9.42	8.62	13.06	13.65	14.23
Potri.001G234700	0.71	0.75	0.49	0.37	0.69	0.32	0.21	0.14	0.1	0.2	0.16	0.33	0.38	0.61	0.4	0.24	0.77	0.55
Potri.001G234900	2.58	2.67	2.91	1.94	1.62	2.2	0.58	0.64	0.87	1.49	1.27	1.08	0.97	1.24	1.44	1.71	1.75	1.6
Potri.001G235300	0.07	0.05	0.13	0.62	0.52	0.51	0.04	0.25	0.14	0.13	0.06	0.03	0.25	0.04	0.13	0	0.28	0.17
Potri.001G235500	145.58	146.65	143.35	45.46	46.49	44.68	164.07	165.37	159.89	172.19	156.77	153.72	153.87	128.65	148.9	146.01	152.43	143.42
Potri.001G235800	10.38	10.18	11.13	1.12	1.26	1.58	9.72	10.31	9.39	5.12	6.02	5.5	11.81	9.9	10.65	21.67	21.11	19.53
Potri.001G237000	25.21	28.66	26.41	13.3	11.63	13.5	26.1	26.24	21.93	31.76	27.97	28	19.32	21.05	22.12	25.78	25.12	23.06
Potri.001G237100	20.73	20.21	20.15	9.55	8.31	9.29	17.58	16.19	16.98	18.26	17.97	16.29	15.12	15.36	16.07	18.42	19.27	20.67
Potri.001G237200	11.87	10.23	12.09	70.14	71.83	65.77	36.66	33.44	34.51	33.19	31.83	29.01	26.41	20.33	21.2	17.73	19.23	20.59
Potri.001G237300	0.45	0.32	0.27	2.47	1.86	1.67	0.97	0.64	1.03	0.32	0.43	0.46	1.08	0.73	1.23	0.86	1.01	1.49
Potri.001G237600	12.67	12.25	14.66	33.99	38.19	32.47	29.55	31.11	31.09	17.56	18.45	18.43	24.78	29.25	27.71	13.6	16.73	15.48
Potri.001G237800	12.38	12.18	10.68	12.64	13.69	12.73	5.07	4.62	4.89	7.06	5.85	6.29	9.14	10.77	9.65	8.45	9.68	9.56
Potri.001G238700	192.33	175.12	177.35	0.9	0.71	0.17	239.2	215.46	220.37	154.48	142.93	145.64	162.04	141.06	158.01	212.59	209.24	226.84
Potri.001G238900	9.05	9.25	9.4	19.32	21	19.27	8.33	10.64	10.16	9.67	10.23	11.15	12.06	11.84	12.65	10.02	9.76	11.31
Potri.001G239700	2.94	4.36	3.95	11.77	9.92	11.35	4.19	5.29	4.67	4.91	3.99	3.38	4.7	4.19	4.27	5.09	5.71	6.13
Potri.001G239900	37.93	39.49	42.16	118.58	111.1	111.15	80.89	83.02	79.78	63.45	61.94	59.56	67.54	69.52	69.12	54.28	55.49	51.84
Potri.001G240000	15.31	14.02	15.78	57.22	51.96	53.61	18.22	19.72	19.67	14.5	12.59	15.34	27.97	28.46	27.04	20.91	21.89	20.04
Potri.001G240300	6.92	6.13	6.47	16.08	15.39	14.64	9.7	9.66	10.25	7.46	7.49	7.91	8.71	10.34	9.65	3.7	3.8	4.47
Potri.001G240600	5.93	5.39	5.05	22.67	22.41	21.29	19.53	21.7	20.92	15.38	15.16	14.72	11.81	10.79	12.77	9.69	8.19	10.46
Potri.001G240700	3.36	2.66	4.16	0.94	1.08	0.83	1.02	1.13	1.41	1.65	1.65	1.7	2.44	2.58	3.13	3.08	2.08	2.53
Potri.001G240900	7.28	7.55	7.89	150.69	147.34	148.62	30.31	31.92	33.74	19.45	18.79	18.91	25.46	25.54	26.16	14.98	15.05	17.02
Potri.001G241300	0.16	0.04	0.2	1.41	1.06	1.28	0.55	1.49	0.96	0.24	0.4	0.46	0.57	0.66	0.56	0.74	0.53	0.39
Potri.001G241500	5.55	4.64	5.35	11.64	11.59	11.14	4.44	5.99	4.65	5.51	3.95	5.13	5.94	6.08	5.62	6.24	5.98	6.38
Potri.001G242000	2.92	2.45	2.44	1.93	1.76	1.88	2.12	1.89	2.14	1.98	2.05	2.01	2.96	3.49	2.57	9.26	9.51	8.73
Potri.001G242100	4.99	4.64	4.2	1.54	1.3	1.52	6.83	7.29	7.7	4.6	3.84	4.21	8.73	7.86	8.04	10.81	12.12	11.51
Potri.001G242600	0.87	1.05	0.79	0.03	0.01	0	0.07	0.18	0.04	0.07	0.03	0.03	0.04	0.09	0.14	0.07	0.14	0.04
Potri.001G243600	2.3	2.53	1.63	3.32	2.48	2.51	10.69	11.41	12.79	12.78	9.9	12.04	5.45	4.67	6.32	2.36	2.15	3.27
Potri.001G243800	5.76	6.05	6.53	3.07	3.26	3.13	5.28	4.92	4.14	4.92	4.57	5.73	7.6	8.46	7.7	6.33	7.08	5.16
Potri.001G245400	0.04	0.28	0.06	2.81	2.68	2.16	0.75	0.34	0.79	0.49	0.38	0.13	0.27	0.23	0.3	0.11	0.36	0.25
Potri.001G245900	0.43	0.61	0.4	1.22	1.49	1.34	0.34	0.11	0.3	0.18	0.3	0.34	0.82	0.52	0.6	0.85	0.7	0.34
Potri.001G246000	0.86	1.17	1.05	3.86	3.59	3.93	2.71	2.09	1.93	1	0.74	1.53	0.87	1.26	1.4	1.88	2.14	2.23
Potri.001G246300	0.63	0.48	0.66	1.65	1.78	1.74	1.56	1.89	1.4	1.71	0.92	1.51	0.59	0.86	0.56	0.59	0.88	0.55
Potri.001G246900	36.97	34.84	39.52	140.86	141.34	137.02	65.53	69.38	71.18	59.59	56.08	54.56	55.18	54.73	52.53	44.75	42.88	42.71
Potri.001G247100	15.56	14.8	16.81	8.18	8.35	7.07	13.4	14.22	14.12	15.74	18.65	18.98	10.8	13	11.66	11.72	12.55	12.77
Potri.001G247600	0.19	0.37	0.12	2.79	2.94	2.4	1.81	1.32	1.41	2.63	1.07	1.64	0.72	0.58	0.49	0.37	0.02	0.26
Potri.001G247700	13.46	12.88	12.77	44.58	45.95	44.95	15.46	14.03	12.91	12.37	10.66	11.17	16.8	12.81	15.37	14.08	14.4	12.21
Potri.001G248100	114.52	113.69	119.06	29.63	28.31	28.45	131.18	135.4	128.15	112.88	111	118.69	78.01	75.14	79.53	106.74	108.77	112.31
Potri.001G248500	4.72	4.55	3	1.78	1.88	2.7	4.83	3.34	3.62	4.19	4.35	2.93	5.41	3.88	4.83	5.06	4.43	5.67
Potri.001G248600	0.41	0.6	0.32	0.1	0.07	0	0.36	0.23	0.44	0.27	0.44	0.3	0.1	0	0.3	0.56	0.69	0.53
Potri.001G248700	0.44	0.27	0.17	1.74	1.83	1.57	0.91	0.72	1.1	1.17	1.13	0.92	0.7	0.41	0.76	0.52	0.68	0.15
Potri.001G249200	92.09	88.03	93.11	15.52	16.6	15.75	18.64	20.24	19.94	29.79	29.8	28.08	31.36	33.71	31.6	51.19	50.4	51.79
Potri.001G249300	3.29	3.31	3.57	7.25	7.64	7.94	3.22	3.69	3.4	2.98	3.2	2.73	3.98	3.11	3.73	3.85	4.39	2.96
Potri.001G249600	129.06	117.33	114.4	121.3	130.84	132.43	33.51	32.88	29.98	53.49	50.05	52.48	88.29	80.71	91.48	95.07	93.27	103.32
Potri.001G249700	0.87	0.56	1.3	11.66	12.78	12.71	10.35	9.06	8.1	8.1	7.38	6.64	7.69	7.42	7.1	1.56	0.7	1.73
Potri.001G250100	0.93	1.28	1.28	1.23	1.49	1.03	2.98	3.39	2.99	2.36	2.04	2.36	1.95	1.27	1.67	1.75	1.53	1.59
Potri.001G250200	0.37	0.4	0.23	1.67	1.87	1.82	0.62	0.27	0.12	0.13	0.16	0.37	0.21	0.4	0.31	0.38	0.03	0.31
Potri.001G250800	9.47	8.9	9.5	3.36	3.85	3.31	7.13	7.47	7.26	8.59	7.25	6.96	8.02	7.96	7.71	7.13	8.25	6.92
Potri.001G250900	1.22	1.73	1.41	3.99	3.39	3.7	1.51	1.15	1.8	1.65	2.36	1.98	3.89	2.31	2.53	1.78	1.84	1.57
Potri.001G251200	0.06	0.29	0.07	1.77	1.43	2.02	0.81	0.52	0.47	0.51	0.39	0.44	0.32	0.05	0.18	0.43	0.9	0.33
Potri.001G251600	3.09	3.56	3.96	1	0.94	1.11	4.91	6.25	4.99	8.17	7.69	10.1	6.21	5.16	8.38	4.23	3.91	5.29
Potri.001G252000	9.16	7.35	7.53	18.75	20.93	18.93	6.38	7.01	6.99	4.7	6.77	5.45	10.37	9.67	9.61	6.24	7.56	6.23
Potri.001G252100	1.53	1.22	1.36	4.77	3.82	4.08	1.07	1.54	1.19	1.09	1.35	1.17	1.59	1.65	1.76	1.16	0.93	1.86
Potri.001G252500	25.53	26.64	25.17	13.47	13.05	13.88	22.51	23.12	23.72	25.5	27.47	25.57	24.33	25.82	26.49	22.57	22.19	23.63
Potri.001G252900	3.28	3.52	4.52	12.49	13.08	12.58	4.97	6.25	5.2	3.38	3.56	3.96	6.15	5.95	6.08	7.16	6.06	6.91
Potri.001G254500	0.85	1.31	1.13	10.89	11.75	13.98	5.64	4.49	4.63	4.39	3.41	3.71	5.46	3.61	4.25	2.8	3.01	2.52
Potri.001G254700	215.58	202.42	204.22	5.33	4.55	5.86	269.56	282.64	266.63	176.13	167.23	172.2	175.95	170.8	171.82	222.71	203.68	203.63
Potri.001G254800	4.49	6.62	5.12	2.03	2.08	1.75	5.47	5.37	4.3	4.32	4.04	5.47	3.65	4.36	3.41	3.77	4.54	4.4
Potri.001G255100	1.72	1.66	2.31	1.38	2.1	1.66	1.63	1.99	2.34	0.76	0.87	0.76	2	1.85	1.38	1.03	1.04	0.93
Potri.001G255500	0.7	0.5	0.57	1.7	1.56	2.62	1.68	1.3	0.82	1.29	0.84	0.9	1.83	1.75	2.02	1.01	0.58	0.89
Potri.001G258400	0.02	0.09	0.08	0.58	0.66	0.4	0.43	0.54	0.72	0.12	0.35	0.25	0.11	0.39	0.32	0.21	0.2	0.12
Potri.001G258500	1.99	2.27	2.53	0.84	0.93	0.81	1.91	1.57	2.02	1.88	1.87	1.96	3.15	2.61	2.75	2.18	2.44	1.66
Potri.001G258600	4.31	4.34	4.54	13.52	14.13	13.69	4.28	5.67	5.11	4.95	4.31	4.29	6.62	5.79	5.76	4.99	4.87	4.27
Potri.001G258700	0.67	0.24	0.53	1.49	1.05	2.2	1.18	1.05	1.24	1.06	0.74	0.96	0.62	0.51	0.55	0.9	0.4	0.28
Potri.001G260800	0.66	0.53	0.64	1.14	1.77	1.5	1.01	1.16	1.71	1.48	1.23	1.09	1.46	1.53	1.55	1.44	1.75	1.55
Potri.001G262900	1.71	2.31	1.53	0.87	1.13	0.72	1.96	0.84	0.91	1.57	2.03	1.53	1.53	1.38	1.2	1.44	1.73	1.35
Potri.001G263700	7.39	7.99	8.43	29.41	27.9	25.83	12.13	11.98	12.29	8.43	7.89	9.02	10.66	9.23	14.02	9.35	9.79	9.08
Potri.001G263900	30.51	28.22	31.07	102.79	104.09	103.4	42.03	40.67	40.92	44.54	42.84	42.52	84.15	82.66	82.45	56.32	58.06	56.12
Potri.001G264000	1.49	1.88	1.66	6.67	6.55	7.49	7.33	6.71	6.57	5.22	6.84	7.82	3.65	5.01	4.26	2.17	2.1	2.38
Potri.001G264900	22.53	22.32	22.5	11.49	9.27	10.1	14.99	15.19	13.13	14.29	16.95	18.64	19.09	20.26	19.02	20.12	17.73	20.28
Potri.001G265300	1.33	1.4	1.53	1.01	1.12	1.04	4.23	3.75	4.72	3.38	2.98	2.94	1.77	1.52	1.71	1.02	1.43	0.93
Potri.001G265400	7.85	7.99	8.36	13.99	14.1	14.41	2.75	2.87	2.65	4.32	3.51	5.25	6.45	7.77	5.85	5.82	7.19	6.07
Potri.001G265600	0.81	0.68	0.88	0.79	0.95	1.19	0.42	0.56	0.11	0.45	1	0.39	0.59	0.59	0.47	0.5	0.41	0.39
Potri.001G266000	9.85	9.77	10.07	5.16	4.89	5.82	9.95	9.65	8.34	10.69	9.81	10.11	7.91	7.53	8.13	5.71	6.54	7.07
Potri.001G266900	2.51	3.23	3.1	3.25	4.01	3.14	7.3	7.41	7.89	3.38	3.18	3.36	5.82	3.84	6.63	4.09	5.6	2.8
Potri.001G267200	1.29	1.71	1.49	4.08	4.91	4.53	2.64	3.3	3.05	2.16	1.93	1.95	3.17	2.24	2.6	1.65	2.49	2.33
Potri.001G267300	0.67	0.17	0.52	1.96	3.15	2.43	2.08	1.68	2.42	0.99	1.08	2.28	1.58	0.8	1.13	0.7	0.91	1.25
Potri.001G267600	0.37	0.39	0.47	3.4	3.39	2.63	0.7	0.57	0.67	1.04	0.88	0.54	0.98	1	0.81	0.44	0.38	1.14
Potri.001G268200	33.92	37.36	32.9	12.29	11.78	14.16	24.83	25.22	26.36	31.23	33.32	33.69	23.45	22.12	22.61	26.73	28.86	25.94
Potri.001G268600	9.67	10.87	9.3	4.07	4.54	4.45	7.02	6.54	6.07	6.27	4.83	5.21	14.31	16.28	12.77	18.66	21.36	20.17
Potri.001G269500	13.4	10.8	12.85	27.26	25.73	26.97	11.49	9.07	10.27	11.71	9.18	8.95	12.45	11.61	12.76	12.83	12.65	10.84
Potri.001G269800	0.12	0.11	0.04	0.56	0.36	0.79	0	0.07	0.09	0.47	0.07	0	0.05	0.16	0.18	0.08	0.11	0.41
Potri.001G270200	1.15	0.81	0.8	0.18	0.27	0.43	0.65	0.85	0.76	1.04	0.78	1.11	0.53	0.61	0.28	0.3	0.63	0.23
Potri.001G270300	0.07	0.19	0.09	1.3	0.73	0.69	0.29	0.21	0.44	0.06	0.18	0.19	0.62	0.82	0.55	0.14	0.31	0.32
Potri.001G270400	0.2	0.37	0.1	4.08	4.39	3.87	1.15	0.71	1.16	0.42	1.02	1.38	2.85	3.82	3.42	0.91	0.98	0.65
Potri.001G270500	0.11	0.22	0.07	0.8	1.25	0.95	0.33	0.45	0.19	0.28	0.2	0.36	0.68	0.88	1.35	0.55	0.42	0.67
Potri.001G270600	0.08	0.3	0.03	0.39	0.45	0.98	0.33	0.25	0.18	0.34	0.21	0.11	0.42	0.51	0.52	0.41	0.43	0.22
Potri.001G270800	0.11	0	0	1.59	2	2.05	0.62	0.5	0.36	0.1	0.11	0.04	0.35	0.26	0.12	0.02	0.05	0.09
Potri.001G271100	5.78	6.46	5.33	13.5	12.76	13.86	5.86	6.17	5.95	4.87	4.59	4.46	6.22	6.61	7.48	6.04	5.33	6.09
Potri.001G271300	26	25.96	24.19	5.52	6.4	5.45	17.38	19.52	18.63	18.63	18.64	20.63	27.14	24.49	23.22	23.49	22.59	24.96
Potri.001G271700	0.98	0.75	0.79	0.49	0.46	0.86	0.28	0.27	0.34	1.09	0.93	0.69	0.28	0.4	0.4	1.15	0.88	0.93
Potri.001G272000	1.03	1.72	1.24	14.25	12.41	12.84	3.23	5.57	4.22	4.24	3.41	4	3.99	3.76	3.71	2.01	2.29	1.76
Potri.001G272700	60.04	64.53	62.91	129.57	136.51	134	118.78	118.47	121.19	147.38	142.54	136.99	85.1	75.09	73.16	63.1	64.47	58.66
Potri.001G272800	69.83	70.24	68.92	145.83	151.55	145.92	141.42	140.69	142.63	182.69	180.73	173.6	93.34	81.02	83.58	72.12	74.43	74.17
Potri.001G273000	4.22	3.5	4.48	10.69	11.46	10.57	5.22	5.61	5.43	3.93	4.11	4.81	5.06	5.17	4.9	5.2	4.85	3.84
Potri.001G273100	2.63	2.31	2.6	1.77	1.03	1.1	1.38	1.63	1.75	0.97	1.3	2.55	2.19	2.16	1.78	1.77	2.21	1.96
Potri.001G273500	4.58	4.82	4.78	4.02	3.67	3.76	4	3.09	2.12	2.19	2.66	1.93	2.52	3.04	1.98	2.59	4.01	3.77
Potri.001G273700	1.82	2.74	2.11	6.75	6.33	6.33	5.77	4.89	5.07	3.19	2.29	3.18	3.18	3.01	2.89	2.09	2.14	2.54
Potri.001G275000	7.58	8.51	6.18	2.96	4.41	4.52	5.61	6.31	6.2	6.18	7.34	7.09	6.71	6.1	6.56	7.1	6.24	7.07
Potri.001G276200	1.83	2.18	1.99	5.72	5.92	6.28	3.17	2.29	3.16	1.87	2.4	2.22	3.88	2.27	2.2	3.34	3.12	3.02
Potri.001G277700	35.08	28.96	27.66	12.49	14.33	13.22	21.9	18.5	20.38	26.01	25.42	25.71	30.81	32.86	28.86	33.93	31.86	31.86
Potri.001G277800	175.97	182.1	172.55	51.44	52.1	50.35	109.18	117.77	111.7	131.27	129.51	124.96	139.01	137.67	147.59	176.56	175.64	181.89
Potri.001G278000	11.77	8.41	11.02	23.71	25.47	28.38	12.47	10.24	10.16	9.83	10.02	10.46	14.3	15.54	12.71	12.38	13.79	13.26
Potri.001G278200	7.71	6.32	8.18	6.84	6.95	6.17	3.09	3.81	3.18	3.73	3.85	4.38	3.33	2.92	3.92	3.96	4.17	3.22
Potri.001G278300	1.75	1.67	2.08	6.75	6.53	6.31	3.98	4.95	3.81	2.7	3.53	3.17	2.03	2.32	2.28	2.44	1.24	1.63
Potri.001G278500	27.87	28.97	28.46	21.67	20.26	20.82	37.43	36.97	35.73	25.1	27.78	29.18	39.22	38.77	40.92	68.17	64.68	68.68
Potri.001G278600	4.31	5.81	4.14	2.25	2.45	2.23	3.32	2.9	3.38	3.56	3.52	3.5	3.37	4.49	4.53	4.45	4.38	3.87
Potri.001G279000	1.23	0.62	1	5.41	5.84	5.36	2.43	2.25	2.32	1.99	1.53	1.83	1.54	1.06	1.33	0.87	1.1	1.37
Potri.001G279400	0.11	0.58	0.15	1.16	1.56	1.07	1.64	1.29	1.01	1.57	0.57	1.53	1.91	0.69	1.03	0.54	0.58	0.44
Potri.001G280200	8.99	9	8.41	27.7	29.96	29.59	32.57	31.91	31.39	43.94	44.39	40.13	19.2	15.35	17.35	14.53	16.77	14.5
Potri.001G281100	1.95	1.82	1.65	0.88	1.31	0.51	1.21	1.28	0.72	1.28	1.01	1.2	1.88	1.16	1.79	1.66	2.2	1.31
Potri.001G281400	24.08	20.97	20.92	9.14	9.65	9.59	17.71	16.6	15.77	17.73	18.76	22.14	20.69	21.2	23.32	22.19	23.71	21.49
Potri.001G281500	0.12	0.21	0.48	0.99	1.07	1.16	0.9	0.95	0.55	0.46	0.49	0.33	0.78	0.53	0.53	0.39	0.78	0.77
Potri.001G281700	1.3	1.49	1.04	1.99	1.99	1.9	5.87	6.49	6.49	6.2	6.67	6.29	2.25	2.06	1.79	1.51	1.23	1.81
Potri.001G281800	2.09	1.67	1.96	2.23	2.62	2.67	1.21	1.37	1.29	0.82	1.05	1.24	1.59	2.02	2.27	3.52	4.27	5.67
Potri.001G281900	2.94	1.95	2.8	3.22	2.62	3.52	1.78	2.26	2.79	2.99	2.29	2.38	3.88	3.95	4.11	6.83	7.8	6.81
Potri.001G282000	1.42	1.04	1.23	0	0.19	0.24	0.67	0.93	1.02	0.61	0.72	0.3	0.64	1.05	0.91	2.22	1.1	1.66
Potri.001G282100	0.95	1.2	0.86	0.48	0.33	0.46	0.63	0.42	0.69	0.36	0.54	0.78	0.76	0.72	0.73	1.76	1.23	1.23
Potri.001G283300	5.87	4.31	4.24	2.01	2.2	2.16	3.69	3.01	4.21	4.49	4.1	3.81	3.18	2.92	3.13	3.05	3.24	3.17
Potri.001G284400	1.74	1.68	2.19	1.05	0.76	0.79	3.64	2.68	4	3.43	4.24	5.38	0.75	1.52	2.27	1.28	1.78	1.05
Potri.001G284500	0.5	1.09	0.84	0.22	0.14	0.52	0.7	2.07	1.51	1.67	3.17	2.88	0.73	0.46	0.88	0.33	0.48	0.57
Potri.001G284700	5.69	2.46	2.19	1.38	0.78	1.86	8.84	9.18	8.83	6.54	9.7	14.06	2.58	1.82	5.07	3.04	2.27	5.52
Potri.001G287400	34.78	33.01	34.78	15.66	16.49	16.63	17.9	17.43	18.43	28.47	27.1	25.72	23.54	22.16	25.44	30.25	30.56	29.81
Potri.001G287800	0.28	0.44	0.31	2.18	1.93	2.07	0.77	0.38	0.78	0.64	0.69	0.86	0.75	0.64	0.55	0.52	0.32	0.51
Potri.001G288600	14.24	16.2	13.28	1.72	1.72	1.44	3.42	3.87	2.92	8.25	8.31	9.24	7.32	5.8	6.76	12.92	9.89	14.66
Potri.001G288900	0.82	0.9	0.87	0.36	0.34	0.36	1.27	1.56	1.63	1.18	1.33	0.69	0.53	0.6	0.71	1.11	1.23	1.07
Potri.001G289100	0.21	0.33	0.13	2.41	2.73	2.1	0.71	1.09	0.72	0.63	0.62	0.59	0.88	0.74	0.84	0.63	0.71	0.21
Potri.001G289500	67.73	65.68	65.32	191.7	198.65	192.97	107.73	110.07	102.83	105.4	104.95	97.7	139.69	144.34	145.18	91.15	86.34	91.14
Potri.001G289700	126.65	127.22	124.67	14.69	15.85	15.7	75.81	73.87	75.55	74.67	71.85	74.76	87.49	88.62	84.7	96.12	97.22	98.85
Potri.001G289800	58.03	57	61.14	21.84	21.38	22.41	37.91	38.95	37.54	45.46	48.82	52.01	41.46	44.51	44.08	46.1	47.79	47.05
Potri.001G291300	1.77	2.16	1.89	0.61	0.96	0.71	1.69	1.41	1.31	1.51	2.12	1.35	2.3	1.94	1.38	0.94	1.67	2.05
Potri.001G292000	4.77	2.46	3.4	4.31	3.43	3.71	0.97	1.66	0.9	1.48	1.72	1.2	2.93	2.59	2.72	2.34	1.42	3.04
Potri.001G292300	1.04	0.75	1.33	3.58	4.09	3.7	1.65	2.39	2.43	0.76	1	0.89	0.94	0.95	1.17	1.39	1.7	1.25
Potri.001G292600	4.33	2.54	3.57	1.74	1.94	1.5	3.56	3.62	2.76	2.27	3.68	4.31	3.01	3.38	2.57	3.21	2.69	3.08
Potri.001G292900	21.02	22.96	20.96	43.59	39.61	39.81	60.48	59.28	54.92	53.08	48.31	45.05	25.3	26.31	25.36	20.92	25.51	27.01
Potri.001G293000	1.77	2.84	1.98	0.63	0.18	0.9	2.32	2.19	2.24	2.65	3.45	2.35	1.26	1.49	1.29	2.82	1.65	2.48
Potri.001G293400	24.37	24.9	23.06	12.52	13.23	10.44	13.5	14.83	15.33	13.52	10.65	13.94	15.72	13.59	15.75	20.21	21.41	20.12
Potri.001G294100	4.85	3.93	4.85	1.89	1.44	2.42	1.94	2.65	3.33	2.2	4.77	4.7	3.5	3.63	2.25	4.2	3.13	3.88
Potri.001G295300	43.96	38.42	39.38	14.76	16.3	14.75	27.18	27.2	23.53	26.9	26.72	30.95	31.76	30.13	31.75	31.14	35.01	35
Potri.001G295400	12.59	10.07	10.82	3.36	5.68	3.08	8.72	7.72	6.91	13.54	10.24	9.36	9.51	13.94	10.27	9.83	12.42	9.88
Potri.001G295500	24.29	25.03	27.26	7.02	6.61	6.89	18.39	19.04	17.43	14.31	15.14	14.03	21.16	18.91	20.38	40.33	39.79	41.31
Potri.001G295800	3.59	3.17	4.21	10.15	10.13	8.78	7.02	6.55	6.77	6.92	7	6.99	5.21	4.94	4.73	3.72	3.92	4.02
Potri.001G296700	0.23	0.32	0.24	1.89	1.98	2.22	0.34	0.6	0.68	0.48	0.47	0.71	0.97	0.8	0.61	0.58	0.5	0.78
Potri.001G296900	1.81	1.2	2.46	1.57	1.64	1.61	0.52	1.34	1.41	1.85	1.97	3.88	0.09	0	0	1.22	0.46	0.86
Potri.001G297700	12.79	10.99	12.06	4.31	3.04	3.57	10.02	10.15	9.07	6.67	6.21	6.78	3.37	4.39	4.44	4.98	4.8	5.43
Potri.001G297900	4.74	6.12	7.16	14.32	13.69	15.54	7.7	7.2	5.94	6.35	6.14	5.14	8.55	7.16	7.48	6.27	10.29	6.79
Potri.001G299300	0.27	0.08	0.15	0.46	0.99	0.59	0.38	0.32	0.32	0.25	0.19	0.22	0.49	0.64	0.41	0.25	0.42	0.19
Potri.001G299500	6.4	5.67	5.91	12.36	13.21	10.75	14.29	13.14	11.6	13.89	12.41	11.58	14.72	12.11	14.64	11.1	12.31	13.98
Potri.001G302600	1.65	1.64	1.89	6.72	6.99	7.4	3.97	3.94	3.63	2.68	2.6	1.98	1.93	2.18	2.46	2.97	2.05	2.77
Potri.001G303000	0.16	0.15	0.1	0.01	0	0	0.05	0.04	0.14	0	0	0	0.18	0.26	0.29	1.1	1.23	0.5
Potri.001G303600	0.02	0.24	0.21	0.09	0	0	0.14	0.13	0.05	0	0	0.04	0.21	0.42	0.17	0.75	0.79	0.5
Potri.001G304100	80.65	79.49	79.64	28.82	29.7	29.72	95.15	97.64	97.74	92.2	99.85	98.4	75.17	76.8	75.04	81.08	79.66	75.5
Potri.001G304400	5.92	5.8	4.98	2.24	2.33	2.86	5.67	6.23	5.43	6.67	5.73	6.33	5.06	5.46	4.14	5.23	6.03	5.82
Potri.001G304800	60.89	60.43	60.18	142.6	148.51	141.63	90.34	91.84	87.24	94.55	93.29	90.05	77.51	58.32	68.72	79.9	85.7	84.74
Potri.001G305400	0.51	0.49	0.57	0.96	0.75	0.76	0.21	0.05	0.19	0.21	0.22	0.44	0.18	0.4	0.21	0.64	0.53	0.57
Potri.001G305500	1.9	1.68	1.13	2.82	3.59	3.73	1.16	1.27	1.54	1.54	1.03	1.31	2.46	1.64	1.61	1.64	1.59	1.64
Potri.001G305800	5.52	5.6	5.16	1.65	1.74	1.47	3.2	3.03	3.22	4.17	4.06	4.08	3.45	2.55	3.27	4.07	4.47	3.98
Potri.001G306200	0.33	0.3	0.41	4.05	4.54	3.89	2.72	2.42	3.05	2.01	2.55	2.29	1.67	1.4	2.2	0.81	0.4	0.6
Potri.001G306500	39.37	40.28	40.85	9.8	10.7	9.74	30.08	28.97	27.48	34.46	36.18	33.16	35.87	32.7	35.49	45.91	45.26	42.27
Potri.001G307300	0.57	0.56	0.76	0.32	0.36	0.24	0.17	0.19	0.27	0.44	0.37	0.6	0.35	0.71	0.46	0.54	0.65	0.55
Potri.001G308200	0.87	1.13	0.87	0.15	0.21	0.18	1.55	1.86	1.69	4.18	4.97	4.18	2.48	1.84	2.83	1.25	1.51	2.28
Potri.001G308300	0.95	1.03	1	0.09	0.37	0.13	2.12	1.91	2.08	4.89	5.02	5.33	3	3.05	3.12	1.43	1.06	1.34
Potri.001G309100	16.57	16.93	16.89	7.07	7.79	8.05	16.91	17.03	17.43	18.78	20.25	21.42	15.7	14.24	17.15	17.1	19.59	16.94
Potri.001G309600	4.97	5.38	3.56	2.9	3.81	4.95	10.31	11.41	13.55	14.16	10.88	12.79	4.57	3.48	4.72	6.64	6.37	6.17
Potri.001G310000	0.17	0.24	0.07	0.93	0.77	0.84	0.34	0.49	0.82	0.13	0.29	0.22	0.18	0.27	0.37	0.24	0.2	0.02
Potri.001G310400	22.69	24.06	22.12	44.76	47.39	41.98	38.71	41.9	43.43	26.28	26.08	23.7	41.86	45.66	46.42	51.45	51.55	51.08
Potri.001G310600	0.94	0.74	0.79	1.59	2.04	1.7	0.71	0.72	0.58	0.83	0.47	0.78	1.09	0.78	0.9	0.71	0.81	0.46
Potri.001G311700	138.89	138.84	138.35	49.17	48.53	45.71	128.8	134.77	135.65	134.98	133.11	135	87.67	89.91	91.39	135.21	137.95	140.87
Potri.001G313000	18.79	21.49	19.13	2.49	2.14	1.48	12.35	10.11	10.86	12.02	12.75	13.59	8.95	9.79	10.48	9.18	10.17	10.06
Potri.001G314400	0.76	0.81	0.76	0.3	0.17	0.53	0.19	0.2	0.21	0.29	0.31	0.4	0.24	0.47	0.11	0.06	0.04	0.27
Potri.001G315000	8.4	8.94	8.5	4.49	3.99	4.35	8.33	8.43	8.81	9.33	8.01	8.56	7.79	7.04	7.68	6.13	6.33	5.41
Potri.001G315200	0.94	0.61	1.25	0	0.04	0.16	0.52	0.11	0.45	0.26	0.14	0.45	0.71	0.59	0.65	1.35	0.7	0.82
Potri.001G315700	0.5	0.13	0	0.52	0.66	0.76	0.72	0.71	0.74	0.15	0.25	0.09	0.28	0.92	0.47	1.1	0.61	0.39
Potri.001G315900	1.89	1.44	1.91	3.98	3.81	4	1.24	2.21	0.89	1.73	1.21	1.56	1.61	1.28	1.92	1.82	2.73	1.41
Potri.001G316000	1.55	1.43	1.26	3.35	3.52	3.08	1.96	1.57	1.31	1.27	1.19	1	1.61	1.78	1.69	1.7	2.01	1.41
Potri.001G316500	2.23	1.73	2.1	0.76	0.71	1.17	1.28	1.44	1.49	1.58	1.67	1.71	2.21	2.34	1.58	1.42	1.67	1.84
Potri.001G318200	0.08	0	0	0.89	1.71	1.44	0.14	0.44	0.31	0	0.09	0	0.14	0.07	0.34	0.15	0.07	0.15
Potri.001G318500	0.13	0.08	0.13	2.34	2.37	2.36	0.45	0.17	0.48	0.17	0.26	0.22	0.46	0.77	0.48	0.68	0.52	0.83
Potri.001G318700	0.04	0.41	0.16	0.81	0.92	0.43	0.89	0.55	0.46	0.32	0.22	0.78	0.26	0.32	0.29	0.36	0.56	0.43
Potri.001G319000	48.31	47.35	49.69	16.53	16.83	17.28	52.44	49.19	50.36	60.06	63.65	63.71	35.22	38.69	36.88	39.96	41.93	39.27
Potri.001G319100	36.17	33.06	29.91	39.54	38.04	36.81	75.44	69.96	69.98	67.06	65.67	58.87	42.05	38.6	37.8	41.41	40.78	35.82
Potri.001G319300	4.68	5.23	7.01	1.78	3.18	2.95	3.62	2.76	2.9	4.89	6.08	5.8	4.06	4.29	4.09	3.57	4	3.87
Potri.001G320400	70.91	79.1	73.27	238.06	243.48	235.06	92.64	92.5	96.58	99.35	102.33	92.82	123.76	105.21	115.31	92	101.54	89.18
Potri.001G320500	100.27	106.81	101.08	445.19	455.29	447.02	128.89	131.62	133.84	119.5	120.32	121.87	189.83	177.52	181.27	132.8	139.28	135.35
Potri.001G320800	1.37	1.46	1.17	12.5	12.18	11.79	7.12	6.94	7.1	7.29	7.03	6.56	5.59	5.22	5.06	1.57	2.36	1.79
Potri.001G321300	4.42	3.83	4.53	6.59	5.25	3.98	11.03	9.86	9.46	5.7	5.95	5.97	5.46	3.79	3.47	3.52	3.98	3.75
Potri.001G321800	5.12	6.23	6	1.61	1.45	1.88	2.27	1.73	2.09	3.49	3.3	3.66	3.4	3.67	3.58	4.89	4.58	4.23
Potri.001G322700	0.19	0.02	0.12	0.73	0.49	0.43	0.3	0	0.14	0.26	0.03	0.41	0.02	0.15	0.15	0.13	0.09	0.07
Potri.001G323700	0.7	0.57	1.1	2.07	1.97	2.58	1.95	2.2	2.23	3.11	2.2	1.93	1.48	1.75	1.35	1.12	0.76	0.42
Potri.001G324500	3.55	3.56	4.14	1.07	1.06	1.1	6.16	3.1	4.25	2.7	4.08	4.45	4.15	5.09	4.04	7.46	6.69	7.65
Potri.001G324800	18.13	20.19	21.08	7.77	8.63	8.1	17.16	16.17	16.78	19.83	17.36	19.47	19.42	17.46	18.52	20.84	18.66	20.99
Potri.001G325200	11.51	10.69	9.82	13.85	14.3	15.33	12.35	12.02	13.01	9.61	9.78	8.67	28.79	31.49	33.07	16.35	18.38	18.83
Potri.001G325300	8.31	10.42	8.7	3.68	4.46	5.21	7.09	6.97	5.86	6.24	6.61	5.67	8.77	8.74	8.72	6.01	6.47	6.79
Potri.001G325800	0.4	0.14	0.48	1.62	1.37	1.65	0.85	0.81	0.68	0.82	0.46	0.66	0.44	0.5	0.74	0.42	0.38	0.62
Potri.001G326000	0.25	0.2	0.18	0.01	0	0.18	0.04	0	0.03	0.05	0.05	0.07	0.01	0.04	0.06	0	0.06	0
Potri.001G326300	4.19	4.98	4.92	30.24	28.17	28.27	15.43	15.03	14.29	13.67	12.44	12.81	13.37	13.73	12.08	6.62	6.13	5.81
Potri.001G326800	1.33	1.49	1.59	0.74	0.68	0.8	1.72	1.51	1.31	1.66	1.65	1.65	2.11	1.86	1.97	1.78	1.94	1.58
Potri.001G327000	16.14	18.13	14.26	7.9	7.23	7.59	17.53	14.49	15.64	15.81	16.95	16.71	9.01	9.99	8.88	13.01	11.09	11.2
Potri.001G327400	8	8.56	9.64	4.58	4.79	4.29	6.78	7.93	7.05	12.41	9.09	11.92	8.66	5.51	7.33	9.13	6.91	8.83
Potri.001G327500	1.48	1.55	2.42	4.85	5.09	4.72	1.78	2.41	1.95	3.6	3.2	2.69	2.19	2.49	2.02	1.81	1.18	0.94
Potri.001G327600	3.04	3.31	1.51	0.31	0.71	0.83	2.39	1.61	2.17	1.9	2.25	5.98	3.59	1.82	2.89	2.05	1.8	0.99
Potri.001G327800	5.62	4.68	5.42	17.33	16.65	17.14	4.17	4.45	4.81	3.85	3.3	5.03	8.17	8.98	8.71	5.58	5.32	5.13
Potri.001G328300	1.22	1.47	0.73	0.07	0.12	0.14	0.78	0.31	0.32	1.59	0.75	1.07	0.33	0.69	0.47	0.97	0.25	0.92
Potri.001G328600	1.51	1.67	1.41	5.02	4.09	5.63	6.3	3.96	3.36	3.25	3.48	4.24	3.04	3.34	2.89	1.12	0.9	1.67
Potri.001G330000	1.95	1.8	1.9	0.8	0.95	0.92	1.41	1.3	1.3	1.1	1.1	1.67	1.1	1.18	1.5	0.71	0.62	0.65
Potri.001G330100	42.03	41.7	42.52	16.1	15.91	15.76	31	30.36	30.96	34.7	33.2	36.95	26.75	31.16	28.32	34.17	38.87	37.55
Potri.001G331100	2.18	2.48	1.66	0.74	0.91	0.48	1.59	1.37	1.2	1.7	2.1	1.61	1.78	1.32	1.39	1.87	1.23	2.52
Potri.001G333200	12.1	11.33	12.22	27.77	25.71	25.55	13.03	13.87	12.27	9.92	12.35	11.33	15.54	15.26	15.25	11.96	13.04	12.91
Potri.001G333600	1.41	1.81	1.45	4.78	4.29	3.77	3.51	2.73	2.77	2.12	2.25	2.46	2.36	2.2	2.26	1.29	1.31	1.65
Potri.001G334500	4.29	4.28	5.46	2.33	3.13	2.67	2.66	2.35	2.19	0.51	0.63	1.33	1.88	1.93	1.99	2.82	2.56	2.07
Potri.001G334700	0.68	0.56	0.76	1.94	2.21	2.66	0.55	0.32	0.51	0.47	0.68	0.29	0.67	0.65	0.83	0.99	0.97	0.84
Potri.001G335000	28.51	29.12	27.78	11.27	11.12	11.93	23.09	23.2	23.84	22.62	23.28	23.73	21.03	22.47	23.49	29.59	29.12	28.78
Potri.001G335300	1.2	1.35	0.95	2.75	2.92	2.87	1.53	1.33	1.18	0.62	0.87	0.9	1.87	2.24	1.79	1.46	1.32	1.22
Potri.001G335900	0.5	0.36	0.38	0.07	0	0.11	0.26	0.26	0.17	0.07	0.22	0.2	0.35	0.35	0.15	0.4	0.54	0.55
Potri.001G336300	2.57	2.63	2.71	11.3	11.82	13.14	11.06	12.04	10.74	12.82	12.55	10.19	8.26	9.47	8.39	4.49	5.21	4.44
Potri.001G339000	19.09	16.12	15.14	8.71	8.28	7.09	15.57	14.57	13.28	16.12	16.1	19.19	13.3	15.03	12.64	13.53	14.76	15.56
Potri.001G339500	0.43	0.58	0.7	22.69	21.86	23.81	1.97	2.3	1.75	1.42	1.35	1.88	0.89	0.84	0.94	1.4	1.69	1.5
Potri.001G340200	1.69	2.45	2.07	13.34	16.74	14.79	4.76	5.54	6.05	1.68	1.49	2.03	3.97	3.78	4.43	4.59	3.38	4.34
Potri.001G340300	3.37	2.78	3.04	18.75	22.76	23.29	9.29	9.05	9.86	3.05	3.02	3.6	6.94	7.28	6.59	6.85	7.1	7.02
Potri.001G340400	6	6.76	6.97	36.88	42.3	40.94	22.49	20.79	22.54	7.33	7.04	7.35	13.4	14.85	13.82	14.42	15.38	13.93
Potri.001G340500	2.4	2.14	1.23	9.21	10.07	9.18	4.37	4.72	4.87	2.2	1.76	2.4	2.95	3.93	3.46	3.81	3.99	4.57
Potri.001G340600	3.06	3.7	3.28	14.04	16.15	16.74	9.64	9.15	9.13	2.7	3.02	3.11	5.66	5.13	4.59	5.72	8.59	5.12
Potri.001G340900	10.3	11.19	10.27	9.07	10.68	8	4.07	4.35	3.29	5.84	6.34	6.91	10	12.2	12.5	11.42	9.32	9.88
Potri.001G341700	0.13	0.49	0.22	0.96	1.02	0.63	0.2	0.15	0.23	0.37	0.22	0.07	0.44	0.41	0.73	0.21	0.61	0.16
Potri.001G342100	6.42	6.27	5.75	1.43	1.74	1.16	5.45	6.79	5.52	6.59	6.53	6.21	6.06	5.72	5.57	4.9	7.23	5.18
Potri.001G342600	65.75	62.94	64.75	24.15	27.79	25.86	65.48	63.81	61.48	65.28	63.11	63.73	65.96	66.69	69.73	59.95	63.07	62.57
Potri.001G343800	7.45	7.25	7.98	3.78	3.03	3.05	12.91	13.4	11.54	11.17	11.71	11.21	14.34	15.44	16.28	9.96	9.39	10.47
Potri.001G345400	0.09	0.03	0.13	1.12	1.32	1.78	0.22	0.33	0.14	0.39	0.22	0.3	0.54	0.35	0.39	0.17	0.08	0.19
Potri.001G345700	1.71	2.02	3.72	7.14	5.99	5.84	2.67	1.66	2.11	2.25	1.52	2.06	1.93	2.38	2.32	2.84	5.39	4.24
Potri.001G345800	0.03	0.07	0.05	1.61	1.16	1.57	0	0	0	0	0	0	0.06	0	0	0.05	0.07	0
Potri.001G346300	3.22	1.94	1.59	0	0.09	0.42	0.85	1.1	0.66	1.15	0.62	1.29	2.01	0.25	1.55	0.63	1.03	1.75
Potri.001G346400	3.38	4.57	5.24	0.9	0.93	0.63	2.5	2.15	2.34	2.94	2.36	3.52	4.49	5.03	4.72	5.33	4.07	4.12
Potri.001G346500	2.64	3.51	3.34	0.3	0.44	1.06	1.25	2.08	1.53	2.32	2.64	2.77	2.65	2.84	1.92	2.07	2.68	1.93
Potri.001G346800	0	0.03	0.2	1.57	1.33	1.56	0.72	0.83	0.57	0.25	0.25	0.51	0.08	0.07	0.16	0.22	0.22	0.5
Potri.001G347100	115.71	115.58	117.62	49.68	52.17	50.78	72.77	75.41	77.98	87.77	89.25	82.66	99.13	99.06	96.96	114.46	113.23	111.94
Potri.001G347300	1.09	0.59	0.96	7.73	9.77	9.09	0.19	0.22	0.23	0.35	0.2	0.22	1.07	1.24	1.36	1.12	0.86	0.86
Potri.001G348100	1.3	0.93	1.51	0.38	0.73	0.59	0.32	0.48	0.55	0.2	0.11	0.36	0.82	0.51	0.71	0.59	0.59	0.56
Potri.001G348200	0.32	0.49	0.6	1.02	0.95	1.5	0.99	1.04	1.14	0.34	0.67	0.58	0.82	0.66	0.72	0.84	0.78	0.62
Potri.001G348300	5.43	5.46	4.73	15.41	15.86	15.02	1.07	2.01	1.72	1.88	1.81	1.54	4.62	4.34	3.55	4.53	4.88	4.27
Potri.001G348900	27.03	26.15	24.73	19.41	20.12	18.78	0.41	0.58	0.33	2.49	2.22	2.81	2.85	2.66	2.59	2.33	2.05	2.39
Potri.001G351300	0.68	0.72	0.46	0.02	0.25	0.09	0.02	0.15	0	0	0.13	0.16	0.16	0.28	0.27	0.16	0.21	0.37
Potri.001G352200	1.77	2.53	1.94	1.17	0.76	0.98	2.02	2.26	1.89	2.63	1.83	2.17	2.08	1.79	1.22	2.98	2.2	2.48
Potri.001G352300	15.62	17.24	17.56	53.3	51.03	48.56	24.58	25.95	26	25.59	28.07	25.54	25.91	20.97	24.64	20.51	22.41	19.46
Potri.001G352400	1.89	1.67	1.66	5.46	5.43	5.56	2.13	2.71	2.7	2.1	2.47	2.34	1.99	2.33	1.57	2.26	2.26	1.68
Potri.001G352700	9.45	10.67	9.69	22.02	25.37	23.23	13.39	13.28	13.2	10.64	11.89	10.93	13.51	14.2	13.57	10.67	11.49	11.68
Potri.001G353300	0.9	0.82	0.68	0.09	0.31	0.39	0.89	0.65	0.98	0.99	0.61	1.09	0.46	0.83	0.39	0.72	0.49	0.42
Potri.001G354100	0.8	0.47	1.02	0.05	0.09	0.63	0.5	1.39	0.63	0.82	1.68	1.34	0.75	0.55	0.99	0.87	0.64	1.61
Potri.001G354200	0.8	0.63	1.52	0.15	0.05	0.15	0.63	0.65	0.63	1.04	1.5	1.55	0.86	0.49	1.1	0.64	0.51	0.68
Potri.001G354300	4.37	5.56	3.72	1.92	0.35	0.68	4.23	3.24	4.02	6.42	3.8	3.99	3.5	3.16	3.9	2.95	4.32	5.9
Potri.001G354400	3.32	3.66	4.16	0.65	0.96	0.49	2.7	2.36	2.56	2.91	3.22	3.46	4.22	4.37	3.53	3.84	3.78	3.29
Potri.001G354900	1.92	1.4	1.75	4.08	5.06	4.25	2.62	3.24	3.32	1.91	1.85	2.08	3.78	3.78	3.53	2.92	3.03	3.1
Potri.001G355200	0.67	1.2	1.29	0.43	0.17	0.03	0.34	0.81	0.92	0.9	0.47	0.62	0.65	0.86	0.59	1.42	1.76	1.48
Potri.001G358200	0.71	0.52	0.96	1.57	1.62	1.76	1.04	1.65	0.51	1.24	0.94	1.33	1.14	1.52	1.01	0.48	0.62	0.74
Potri.001G358800	8.14	8.57	7.5	7.35	7.17	6.7	3.04	3.32	3.32	4.27	5.74	5.73	4.98	6.1	6.12	6.63	7.74	7.3
Potri.001G359100	13.98	12.87	14.05	5.2	4.41	4.62	8.45	6.68	7.3	11.62	12.02	9.76	11.54	11.83	13.19	12.59	12.34	13.18
Potri.001G359200	15.54	18.3	16.58	6.07	6.52	5.89	9.91	8.28	9.66	10.59	10.8	10.44	13.04	15.62	13.4	14.63	15.48	13.8
Potri.001G360200	0.79	0.71	1.01	9.92	10.96	9.96	3.82	4	3.52	3.13	2.71	3.73	2.97	3.6	2.92	2.05	2.17	1.65
Potri.001G362000	0.82	0.59	0.82	0.24	0.16	0.1	1.09	0.71	0.77	1.01	1.25	0.84	0.8	0.59	0.7	0.82	0.76	0.49
Potri.001G362200	0.83	0.96	1.15	0.51	0.51	0.42	0.38	0.8	0.45	0.87	0.78	0.96	0.89	0.74	0.56	1.43	1.18	0.95
Potri.001G366100	39.15	36.83	36.25	122.2	114.92	116.06	71.27	76.53	70.58	41.48	39.68	41.84	53.8	55.5	55.78	54.18	55.32	56.3
Potri.001G366500	1.71	1	0.79	7.64	7.62	7.5	3.68	3.96	2.88	2.81	2.46	1.88	1.74	1.63	1.55	1.22	1.96	1.5
Potri.001G366700	3.54	2.6	3.4	1.65	1.22	1.01	2.17	1.85	1.46	1.17	1.36	1.14	3.2	2.93	2.98	2.88	2.75	3.38
Potri.001G367100	15.35	15.15	15.07	34.77	34.09	35.58	30.12	30.46	27.73	23.38	21.52	21.02	20.91	19.91	24.43	26.4	26.47	24.81
Potri.001G368000	11.65	11.81	11.39	30.83	30.45	30.21	7.58	7.48	7.25	8.45	8.1	7.89	8.36	8.12	8.31	10.39	10.79	11.39
Potri.001G368200	0.48	0.43	0.45	1.16	1.39	0.93	1.16	1.45	1.57	1.01	1.11	1.11	0.72	0.94	0.75	0.6	0.37	0.47
Potri.001G368300	1.38	0.81	0.92	2.27	2.29	2.74	1.08	1.16	1.51	1.11	1.32	1.22	1.76	2	1.92	1.64	2.04	1.39
Potri.001G368500	20.96	19.88	18.21	8.61	7.06	6.73	11.98	12.61	11.65	16.03	14.81	14.96	15.17	13.32	13.85	15.99	17.52	18.84
Potri.001G368700	6.58	6.22	6.51	1.94	1.82	2.16	5.12	4.87	4.97	6.75	6.86	7.14	5.37	5.48	5.99	5.96	5.48	4.97
Potri.001G368800	3.43	5.02	3.84	1.46	1.44	1.51	3.11	4.55	2.37	3.38	3.86	3.23	3.36	2.94	3.55	3.8	3.54	1.94
Potri.001G369100	1.37	1.72	1.34	0.48	0.37	0.85	0.35	0.5	0.59	0.76	0.78	0.54	0.71	1.01	0.98	0.9	1.26	0.73
Potri.001G369900	5.02	5.27	4.63	2.82	2.85	1.88	4.26	4.96	3.98	5.03	5.51	4.94	5.73	6.34	6.59	4.79	4.52	5.28
Potri.001G370100	0.59	0.55	0.32	0.43	0.46	0.27	0.91	1.06	1.23	0.69	0.92	0.64	1.12	0.7	1.05	0.34	0.53	0.23
Potri.001G370800	1.16	1.26	1.16	6.34	5.02	5.76	4.66	3.76	4.3	5.14	4.05	3.92	3.84	2.6	3.47	2.24	1.73	2.64
Potri.001G371200	5.61	5.35	4.42	19.02	20.61	18.51	12.16	12.33	12.35	14.33	14.47	13.48	10.42	6.89	8.35	6.13	7.41	6.75
Potri.001G372500	7.03	8.3	11.18	2.78	3.29	2.33	6.97	6.65	9.54	9.93	11.25	11.4	4.59	6.51	7.08	6.71	7.38	7.1
Potri.001G375700	2.02	1.31	1.65	13.55	13.27	13.28	11.84	10.27	10.64	14.1	14.23	10.75	6.88	4.39	4.69	3.48	3.83	3.86
Potri.001G376200	32.01	26.99	26.99	6.83	5.8	6.69	14.22	15.61	12.37	19.02	17.73	14.7	8.19	6.57	10.87	23.18	22.38	25.75
Potri.001G376700	0.39	0.19	0.11	4.21	4.1	5.05	1.48	1.19	1.83	1.82	0.96	1.37	0.97	0.63	0.99	0.65	0.5	0.84
Potri.001G377600	1.31	2.14	3.45	0.12	1.03	0.64	2.45	3.31	2.48	4.12	4.41	2.81	2.41	2.15	2.34	1.84	1.75	2.43
Potri.001G377900	8.89	7.18	7.64	51.51	49.42	52.48	9.87	10.5	8.16	7.4	7.66	8.17	10.63	11.29	11.91	7.88	8.11	8.69
Potri.001G379000	103.2	105.62	107.85	85.49	89.89	83.1	23.79	22.68	22.54	29.98	28.01	28.34	83.86	80.7	83.77	101.82	97.16	100.09
Potri.001G379100	12.01	11.62	10.84	3.57	3.41	4.47	9.59	8.49	8.35	14.41	15.32	13.71	8.29	10.68	9.92	9.56	9.76	9.47
Potri.001G379200	1.67	2.49	2.02	0.25	0.66	0.38	2.4	2.56	2.15	3.63	3.33	3.02	2.5	1.91	2.34	1.87	2.53	1.56
Potri.001G380000	1.4	1.38	1.26	7.68	8.34	7.21	5.63	6.45	5.38	3.07	2.13	3.02	6.19	6.13	5.76	2.18	2.54	2.68
Potri.001G380500	5.39	6.08	4.62	8.11	8.33	7.43	2.6	1.77	2.35	3.45	3.19	4.54	5.58	5.58	5.41	5.14	5.08	4.98
Potri.001G380600	0.38	0.58	0.34	5.43	5.64	5.66	2.65	1.68	1.45	3.65	3.04	2.62	2.76	2.73	2.19	1.45	0.62	0.34
Potri.001G380800	1.33	1.19	1.38	1.16	1.12	1.22	0.52	0.7	0.74	0.5	0.38	0.78	0.97	0.71	1.2	1.24	1.41	1.45
Potri.001G381000	6.07	5.73	6.39	0.9	1.07	0.75	7.11	8.84	7.5	2.68	3.88	3.66	9.64	8.55	9.1	15.25	15.22	16.75
Potri.001G381700	36.44	38.16	37.48	15.75	17.21	18.03	31.07	28.77	30.94	35.82	38.09	39.03	31.87	33.49	31.67	38.21	37.49	35.79
Potri.001G382100	3.84	6.11	6.04	2.32	2.38	2.64	4.29	3.87	3.81	5	6.28	8.08	4.31	4.25	4.56	4.46	4.65	6.48
Potri.001G382400	8.29	8.97	8.7	1.23	1.75	1.32	7.93	6.34	6.33	9.87	9.42	8.48	6.87	3.34	5.07	7.47	7.29	6.19
Potri.001G382500	1.06	0.48	0.78	1.31	1.88	1.88	1.82	1.26	1.29	0.44	0.49	0.99	0.89	0.53	0.5	0.59	0.48	0.82
Potri.001G383300	2.51	2.14	1.59	4.97	5.55	6.95	2	2.93	2.48	3.32	2.61	2.06	4.1	3.67	4.16	3.58	3.09	2.81
Potri.001G383500	31.43	32.02	33.18	77.98	79.18	81.27	33.33	33.23	36.26	33.67	33.61	30.96	52.11	51.29	49.66	40.06	39.54	37.89
Potri.001G383600	8.58	8.83	9.17	30.34	29.78	29.75	10.3	10.11	10.35	9.05	10.15	10.36	11.28	13.19	12.63	11.27	10.78	10.9
Potri.001G384000	11.31	9.14	10.51	4.95	4.84	5.68	13.72	13.21	14.66	15.17	14.06	14.26	9.78	7.96	11.31	9.59	12.88	11.81
Potri.001G385600	0.41	0.35	0.26	0.87	0.94	0.66	0.55	0.43	0.56	0.54	0.58	0.45	0.33	0.29	0.41	0.33	0.32	0.2
Potri.001G386900	1.19	1.13	0.92	2.02	2.69	3.67	1	0.96	0.8	1.14	1.29	1.26	1.69	1.85	1.58	1.13	1.52	0.6
Potri.001G387600	44.35	43.36	44.88	107.97	111.5	105.02	45.5	44.45	47.21	43.67	41.86	43.72	64.74	65.93	62.46	47.9	48.59	48.27
Potri.001G388900	11.14	10.14	9.92	2.66	2.79	2.39	2.88	3.51	3.14	4.28	4.62	4.68	3.59	3.97	3.8	9.34	10.69	9.69
Potri.001G389800	0.65	0.85	0.91	2.19	2.84	4.89	0.79	1.12	5.88	4.83	0.78	0.73	2.76	3.96	4.14	0.86	2.86	7.62
Potri.001G390600	14.64	13.16	13.73	6.6	5.57	5.89	8.93	9.78	8.83	10.18	10.84	11.04	18.37	16.91	16.79	11.66	13.62	13
Potri.001G390900	0.11	0.11	0.15	1.37	1.05	1.53	0.71	0.16	0.42	0.12	0.31	0.2	0.87	0.71	0.37	0.66	0.84	0.11
Potri.001G391900	56.01	55.26	54.6	119.38	118.3	119.46	47.11	45.76	48.41	54.1	59.79	58.76	117.36	122.58	114.1	52.21	51.3	48.66
Potri.001G392700	2.88	2.69	2.94	8.35	8.43	7.11	3.37	2.6	2.73	3.95	4.12	3.93	3.36	3.68	3.56	3.35	2.14	2.74
Potri.001G393300	0	0.04	0.04	0.9	0.71	1.22	0.92	0.35	0.84	0.37	0.35	0.47	0.48	0.72	0.49	0.05	0.15	0.04
Potri.001G393700	3.75	3.97	3.62	3.36	4.17	3.8	2.31	1.91	1.46	1.58	1.81	1.51	2.66	3.13	3.37	2.67	3.13	2.33
Potri.001G393800	9.74	8.62	9.06	9.33	10.25	9.6	4.13	4.02	3.82	3.64	2.71	2.85	7.48	7.51	6.76	11.99	13.29	12.61
Potri.001G394400	95.62	98.29	97.51	78.95	78.67	79.12	22.48	23.84	21.21	38.72	35.63	35.44	64.48	63.1	65.8	72.5	73.33	72.88
Potri.001G395300	1.3	1.63	2.03	4.1	3.98	3.66	1.42	0.92	1.45	1.27	1	1.22	1.77	1.64	2.46	1.09	1.18	0.79
Potri.001G398000	0.68	0.85	1.05	2.83	2.66	2.91	0.89	1.02	1.13	1.23	1.17	1.09	1.33	1.45	1.61	1.28	0.74	1.08
Potri.001G398200	1.17	2.04	1.53	1.22	1.49	2.02	2.76	2.93	2.85	4.16	3.36	4.1	3	1.47	1.91	1.09	0.67	0.98
Potri.001G398400	26.42	29.99	28.19	7.96	7.74	8.22	35.16	32.6	32.86	46.77	44.2	51.77	24.92	23.96	27.72	23.84	21.58	25.89
Potri.001G398700	6.96	6.64	6.86	22.12	21.09	23.77	12.32	11.32	12.66	5.99	6.74	6.53	7.01	6.62	6.47	6.06	7.5	7.88
Potri.001G399500	11.22	9.97	9.99	4.75	4.99	4.77	10.72	9.53	8.66	10.49	11.63	10.88	11.56	11.02	10.11	11.91	10.95	9.98
Potri.001G399600	25.16	27.56	25.94	23.51	23.8	24.04	9.82	9.79	10.45	13.86	14	12.62	19.9	21.57	20.35	22.33	21.99	21.18
Potri.001G400400	46.9	47.7	48.85	22.47	20.6	22.47	60.6	59.75	61.78	44.4	44.77	44.22	67.7	55.78	59.93	62.76	69.5	64.43
Potri.001G401100	0.35	0.19	0.15	0.64	0.76	0.9	0.49	0.55	0.36	0.86	0.61	0.27	0.34	0.37	0.65	0.29	0.39	0.31
Potri.001G401300	2.41	2.27	3.02	11.53	10.97	10.94	4.72	6.49	4.86	6.6	6.02	5.08	5.5	4.87	4.83	3.8	3.92	3.39
Potri.001G401800	0	0	0.06	2.46	1.21	1.64	0.29	0.05	0.41	0.05	0	0.05	0	0	0	0.28	0	0.14
Potri.001G402900	7.91	7.8	5.77	9.45	8.47	9.27	15.63	14.38	14.62	10.72	11.04	9.52	15.4	14.16	12.77	6.59	8.27	7.64
Potri.001G403000	83.17	84.41	77.56	34.68	39.02	39.39	71.25	71.49	68.58	66.77	67.15	69.88	57.92	56.53	59.07	84.42	80.22	85.46
Potri.001G403200	14.8	15.32	14.58	6.37	6.38	7.36	11.15	11.37	11.48	11.19	12.08	11.11	14.75	13.25	14.97	15.09	14.92	15.42
Potri.001G403300	57.22	57.63	57.33	146.21	138.4	143.26	131.47	130.23	129.51	105.69	107.28	99.33	94.37	94.14	89.61	66.06	65.05	61.76
Potri.001G403600	25.99	25.88	21.58	80.29	83.37	74.38	51.42	46.8	47.98	43.4	36.88	38.26	41.5	36.42	42.03	27	31.11	30.91
Potri.001G403900	35.18	34.13	33.67	13.8	13.39	14.67	25.1	23.86	22.27	28.97	30.6	34.51	24.64	26.49	24.55	26.43	28.74	28.93
Potri.001G404100	18.45	17.24	16.42	3.49	4.1	3.19	8.15	8.66	8.69	2.75	3.54	3.1	6.54	4.98	4.86	13.91	13.3	13.13
Potri.001G404500	3.99	5.59	5.59	1.68	0.55	1.51	3.12	1.98	1.6	2.87	2.08	2.41	1.94	2.72	2.05	1.72	1.49	2.38
Potri.001G404600	22.98	20.49	21.37	9.61	10.42	9.11	9.24	7.44	8.25	9.73	10.59	9.41	8.48	10.11	9.06	11.88	13.81	13.53
Potri.001G405700	25.26	26.73	25.79	3.35	2.97	3.51	17.68	19.51	16.8	16.27	14.91	16.45	12.45	14.23	13.36	21.7	21.12	22.56
Potri.001G405900	0.96	0.93	0.97	0.34	0.35	0.1	1.04	0.39	0.75	1.08	1.32	1.23	1.08	1.42	1.11	1.49	0.92	1.06
Potri.001G406100	2.2	1.9	2.09	0.2	0.14	0.37	1.39	0.95	0.95	1.09	1.14	1.03	1.35	1.65	1.53	1.42	1.99	2.19
Potri.001G406300	60.14	57.38	59.86	27.33	25.29	27.57	52.65	55.28	54.41	59.23	59.86	62.83	56.81	55.1	55	57.96	58.66	60.08
Potri.001G406600	1.03	1.1	1.12	2.01	2.32	1.74	1.64	1.46	1.36	2.31	2.34	1.97	1.61	1.65	1.56	2.22	1.86	1.34
Potri.001G407200	0.4	0.37	0.28	1.06	0.74	0.66	0.31	0.67	0.36	0.79	0.42	0.86	0.38	0.79	0.5	0.42	0.17	0.4
Potri.001G407900	1.64	1.58	1.64	2.56	2.92	3.96	0.17	0.28	0.24	0	0.22	0.26	0.77	0.98	1.97	0.97	0.65	0.48
Potri.001G409500	7.08	6.48	6.71	1.62	1.25	1.39	7.12	8.79	8.01	3.36	3.38	4.05	7.31	8.51	9.84	20.33	18.36	20.41
Potri.001G410400	5.16	4.86	5.88	11.49	12.03	11.73	16.71	16.2	16.06	9.06	8.64	10.04	3.58	3.02	3.87	6.07	6.88	4.84
Potri.001G410700	38.55	37.54	36.45	137.48	133.4	132.16	39.71	45.86	41.91	37.71	36.76	35.31	48.52	48.24	50.2	45.1	42.53	42.56
Potri.001G411000	0.15	0.17	0.38	0.66	0.81	0.8	0.41	0.1	0.26	0.18	0.31	0.34	0.46	0.34	0.33	0.4	0.24	0.13
Potri.001G411700	0.91	1.1	0.98	0.49	0.37	0.49	0.33	0.44	0.7	0.8	0.55	0.84	0.5	0.32	0.47	1	0.82	1.03
Potri.001G411800	99.78	94.87	101.43	26.78	23.21	27.4	102.98	115	109.47	77.08	71.57	68.64	97.24	97.45	109.04	141.76	152.5	147.69
Potri.001G412100	5.01	5.07	6.02	1.33	1.5	1.73	2.87	2.63	2.75	4.19	3.45	3.75	3.97	4.28	4.44	7.06	5.82	6.5
Potri.001G412300	0.73	0.78	0.82	0.21	0.18	0.23	0.27	0.23	0.47	0.24	0.36	0.33	0.75	0.27	0.74	0.53	0.7	0.32
Potri.001G414700	33.52	35.87	37	21.39	23.22	22.24	11.99	14.36	13.47	17.47	18.92	16.74	26.65	28.17	25.14	30.81	30.04	31.55
Potri.001G415100	0.15	0.12	0.11	0.11	0.17	0.17	0.34	0.56	0.38	0.1	0.03	0	0.6	0.81	0.68	0.28	0.13	0.29
Potri.001G415200	8.09	8.67	7.83	1.74	2.02	1.65	10.16	10.05	8.96	4.71	4.81	5.66	9.39	10.48	11	23.47	23.3	22.03
Potri.001G415800	0.16	0.12	0.11	0.84	0.92	0.92	0.3	0.6	0.35	0.19	0.31	0.55	0.46	0.37	0.34	0.25	0.27	0.21
Potri.001G416300	5.93	6.12	5.22	20.11	21.05	19.17	11.67	10.61	11.47	10.95	11.22	10.91	9.9	9.4	9.59	7.47	7.95	8.01
Potri.001G416400	9.63	10.15	9.96	3.52	3.27	2.82	3.05	2.69	2.49	4.26	4.88	3.42	5.12	5.54	6.42	6.36	6.66	5.94
Potri.001G416500	49.73	46.32	43.61	7.08	6.65	5.86	10.15	11.28	11.04	18.59	18.23	16.94	11.05	12.93	11.12	23.31	27.24	23.32
Potri.001G416800	4.5	5.69	4.69	29.39	29.25	27.09	27.16	26.06	26.64	26.03	25.8	20.82	22.43	14.04	17.25	13.14	15.3	12.06
Potri.001G417400	9.56	8.76	10.69	5.7	6.66	5.17	4.69	3.99	4.52	5.94	5.55	6.07	8.06	8.84	9.08	8.19	6.72	8.2
Potri.001G419200	1.99	2.24	2.04	12.63	15.12	17.29	6.81	4.42	5.24	2.57	2.17	2.45	5.82	4.58	5.69	4.5	4.52	5.8
Potri.001G419400	1.83	2.08	1.49	0.43	0.68	0.71	2.22	1.1	2.2	2.16	2.17	2.98	1.02	1.27	0.57	1.67	1.84	1.83
Potri.001G420000	0.09	0.13	0.14	0.28	0.48	0.69	0.46	0.39	0.32	0.22	0.16	0.17	0.26	0.2	0.35	0.22	0.17	0.16
Potri.001G420200	17.98	17.42	15.86	40.03	39.28	37.95	16.79	17.49	15.69	17.34	17.29	16.25	21.43	23.77	20.62	22.06	20.13	20.53
Potri.001G421000	0.31	0.59	0.44	1.13	0.96	1.14	0.67	1.05	0.92	1.25	0.86	1.03	1.38	0.96	1.06	0.74	0.49	0.84
Potri.001G421600	2.15	2.13	1.81	0.93	1.27	0.73	0.98	0.93	1.36	1.63	1.86	1.25	2.59	1.59	2.26	1.64	2.09	1.95
Potri.001G422300	31.13	32.63	30.19	8.56	8.48	8.14	14.98	12.15	13.76	20.1	21.33	19.29	6.58	7.28	6.79	21.66	20.01	17.31
Potri.001G422600	9.03	10.04	8.98	26.33	26.93	25.95	19.82	19.53	18.49	9.27	8.43	9.42	25.3	21.73	21.12	9.46	11.32	10.22
Potri.001G422800	3.48	3.25	3.55	1.62	1.5	1.43	3.23	2.99	3.35	3.06	3.44	3.74	2.68	2.73	3.04	2.45	2.74	2.78
Potri.001G424300	7.51	7.45	8.82	3.63	3.56	3.33	7.06	8.04	6.79	6.51	7.82	7.62	5.02	4.6	3.03	4.04	3.79	4.17
Potri.001G424400	9.68	8.71	10.86	3.17	3.41	3.01	8.8	12.39	6.64	7.92	13.98	7.98	5.27	5.89	5.91	4.1	5.15	6.67
Potri.001G424700	0.98	2.6	1.77	2.33	2.16	2.87	0.11	0.2	0.2	0.39	0.36	0.54	0.87	1.46	1.11	1.34	1.06	0.86
Potri.001G424900	171.04	160.99	161.57	87.64	83.88	86.28	131.7	142.1	130.85	187.04	171.3	166.64	114.06	114.14	115.48	143.33	148.27	141.32
Potri.001G425300	0.19	0.28	0.36	0.06	0.12	0.1	0.14	0.18	0.12	0.16	0.16	0.14	0.18	0.24	0.14	0.25	0.11	0.13
Potri.001G425900	1.21	0.97	1.05	0.45	0.63	0.57	1.23	1.27	1.19	1.05	1.13	1.14	0.71	0.96	1.01	0.93	0.61	1.06
Potri.001G430100	4.11	3.2	3.73	3.91	4.55	3.81	1.7	1.56	1.82	1.97	2.96	1.85	1.72	1.19	0.93	2.4	2.62	2.64
Potri.001G430200	2.66	1.99	2.27	1.67	1.24	2.06	0.74	0.39	1.01	1.97	2.54	1.56	0.46	1.46	1.07	1.06	1.26	1.43
Potri.001G430800	0.15	0.28	0.18	0.59	0.81	0.9	0.26	0.94	0.58	0.43	0.29	0.57	0.26	0.26	0.69	0.29	0.24	0.14
Potri.001G435300	1.65	2.28	1.99	0.96	1.22	0.68	1.14	1.4	1.41	1.5	1.71	1.87	1.58	1.62	1.16	1.51	1.53	1.66
Potri.001G435600	1.64	1.02	0.79	0.07	0.06	0.31	0.46	0.59	0.48	0.54	0.78	1.98	0.36	0.43	0.6	0.54	0.97	0.64
Potri.001G436200	0.36	0.19	0.28	1.72	1.78	1.51	1.04	0.84	0.67	0.81	0.69	0.83	0.56	1.01	0.83	0.55	0.52	0.42
Potri.001G437400	123.79	124	125.88	3.03	3.92	4.32	94.35	90.48	87.42	167.15	156.69	169.5	61.16	53.12	54.99	131.03	135.89	140.65
Potri.001G437700	0	0.04	0.01	0	0.04	0	0	0	0.02	0	0	0	0	0.02	0	0.34	0.32	0.23
Potri.001G438400	0.87	1.04	0.82	0.44	0.57	0.42	0.67	0.48	0.51	0.67	0.58	0.36	0.67	0.95	0.51	1.05	0.95	1.12
Potri.001G438600	11.75	12.73	13.5	31.83	30.16	29.85	3.02	3.45	3.71	4.73	4.22	3.73	3.96	4.29	4.61	3.39	2.53	3.65
Potri.001G438700	24.94	23.73	23.26	61.54	58.42	63.69	7.58	8.64	8.74	10.45	10.02	7.36	8.9	9.92	8.66	8.76	7.48	8.65
Potri.001G438800	480.09	477.9	456.29	563.35	527.48	553.99	1082.82	1021.25	958.54	1117.7	1027.76	1042.75	432.65	404.3	440.93	488.77	503.04	533.34
Potri.001G440200	0.11	0.04	0.04	0.47	0.41	0.49	0.05	0.09	0.03	0.22	0.15	0	0.07	0.07	0.07	0.11	0.11	0.04
Potri.001G440300	4.88	4.88	5.22	15.25	14.46	14.82	5.21	5.99	6.1	5.73	4.99	5.72	7.1	7.54	6.82	4.9	5.04	4.07
Potri.001G442000	0.48	0.48	0.28	0.36	0.43	0.45	0.21	0.37	0.17	0.21	0.18	0.59	0.15	0.12	0.19	0.37	0.29	0.49
Potri.001G442300	0.62	1.04	1.19	18.88	17.49	16.77	6.47	6.16	6.18	6.78	4.53	6.04	5.61	6.19	7.1	1.93	1.48	1.29
Potri.001G442400	7.21	9.27	7.79	4.1	3.27	3.9	7.67	7.16	7.84	9.92	9.95	9.06	5.68	5.71	5.94	7	6.65	8.87
Potri.001G442500	0.74	0.59	0.46	4.97	3.44	3.54	1.14	0.51	1.27	0.63	0.73	1.14	1.53	1.72	1.25	0.62	0.42	0.92
Potri.001G442600	11.19	12.15	11.45	5.49	5.06	5.56	11.07	10.39	9.81	11.65	11.99	11.46	5.44	7.16	6.64	5.12	4.91	5.06
Potri.001G443000	0	0	0.07	0.19	0.23	0.07	0.71	0.52	0.45	0.29	0.67	0.37	0	0.35	0.18	0.42	0.2	0.34
Potri.001G443100	0.06	0.16	0.11	0.13	0.47	0.07	1.48	1.17	0.79	0.87	0.71	1.28	0.58	1.11	0.43	0.59	0.96	0.39
Potri.001G448000	0.76	1.17	1.09	2.68	2.98	2.42	3.56	2.99	2.22	3.59	2.75	2.65	1.84	1.66	1.72	2.77	2.91	2.94
Potri.001G448300	0.58	0.94	0.93	4	3.62	4.89	4.27	5.9	5.9	5.56	4.73	4.77	1.9	2.06	1.44	1.02	1.16	1.32
Potri.001G449100	11.78	12.52	13.71	44.24	42.72	42.5	19.28	20.96	19.77	16.35	16.87	17.82	25.25	26.12	26.22	14.78	15.25	16.35
Potri.001G449500	32.91	33.92	33.19	139.03	132.25	133.61	39.73	42.06	41.17	32.8	35.51	36.53	56.31	54.79	53.14	33.4	33.95	33.32
Potri.001G449800	12.22	11.6	11.25	2.53	2.74	2.7	6.44	6.84	6.17	7.27	7.99	6.77	12.46	10.7	12.53	19.7	17.73	20.73
Potri.001G450000	65.74	71.58	74.18	18.76	17.59	14.88	51.35	40.94	46.27	49.96	48.99	53.02	87.49	82.36	85.44	128.85	122.82	124.22
Potri.001G450600	6.18	5.63	5.45	15.2	17.28	16.59	8.9	10.44	9.87	7.7	6.02	6.87	6.8	5.38	6.73	5.75	6.03	5.17
Potri.001G450700	0.75	0.9	0.69	3.37	3.69	2.87	2.49	1.59	1.19	1.26	0.38	1.15	1.94	1.61	1.5	0.6	1.22	0.61
Potri.001G451100	25.6	29.11	30.27	5.37	4.81	6.75	27.93	26.63	25.69	37.16	39.91	36.61	19.3	20.76	18.73	32.15	33.01	32.21
Potri.001G451900	0.23	0.97	0.6	0.19	0.18	0.46	0.22	0.47	0.33	0.08	0.07	0	0.43	0.21	0.27	0.75	0.33	0.13
Potri.001G452000	1.07	1.03	0.57	0.52	0.25	0.32	2.11	1.78	2.2	1.12	1.37	1.55	0.86	0.61	0.63	1.39	1.54	2.4
Potri.001G452200	0.75	1.07	1.12	0.49	0.62	0.39	0.81	0.93	1.16	0.96	1.01	0.5	0.55	0.8	0.6	0.54	0.59	0.63
Potri.001G452300	15.81	15.41	15.72	8.2	8.16	8.22	13.44	12.97	13.74	16.91	15.2	15.23	12.19	12.67	13.23	13.78	12.97	12.56
Potri.001G452400	42.38	44.24	45.22	22.05	21.23	25.13	44.63	46.17	43.45	50.76	48.99	49.56	29.4	31.01	29.32	46.28	36.99	39.53
Potri.001G452900	3.12	2.7	4.84	7.36	7.65	7.12	10.72	10.24	10.86	6.36	5.48	7.21	6.78	6.72	6.61	5.75	5.88	7.29
Potri.001G453000	0.44	0.27	0.11	1.06	1.07	0.88	1.31	1.1	1.88	0.73	0.72	0.13	0.5	0.59	0.4	0.35	0.46	0.61
Potri.001G453800	24.86	22.84	21.23	0.9	1.36	0.59	8.88	10.38	8.26	12.49	12.33	11.85	7.66	8.27	7.55	16.28	16.81	15.39
Potri.001G454900	14.84	16.1	17.07	9.08	7.63	8.31	14.98	16.22	13.54	15.11	15.04	14.8	19.2	18.58	20.67	17.64	15.93	16.24
Potri.001G455600	20.24	18.62	24.02	9.03	9.06	9.39	20.04	20.02	19.02	17.94	25.19	25.39	15.27	18.68	16.71	16.39	17	17.55
Potri.001G455700	7.55	8.05	8.92	3.49	3.04	3.21	6.72	7.46	6.72	4.85	7.85	10.01	4.53	6.69	5.89	5.97	5.18	6.34
Potri.001G456000	0.42	0.68	0.56	0.1	0.55	0.37	1.39	1.35	1.32	2.32	1.22	2.47	1.06	1.19	1.52	0.48	1.42	0.74
Potri.001G456400	0.53	0.51	0.51	1.14	1.35	1.54	0.49	0.39	0.27	0.22	0.48	0.16	0.73	0.96	0.89	0.78	0.88	1.05
Potri.001G457000	0.07	0	0	0.99	1.07	0.81	0.3	0.35	0.55	0.65	0.13	0.26	0.33	0.51	0.15	0.05	0.14	0.1
Potri.001G457400	3.45	1.9	3.27	1.73	1.79	0.13	1.33	0.43	1.01	0.53	0.42	1.05	2.54	1.83	0.66	1.16	2.25	1.49
Potri.001G458000	0.67	0.64	0.63	3.14	3.07	2.15	1.6	1.8	2.22	1.72	1.31	1.11	0.88	1.02	0.69	1.1	1.19	0.54
Potri.001G459400	9.88	8.66	8.24	4.19	4.53	5.16	5.45	5.32	4.13	6.48	5.94	6.25	7.13	8.87	8.32	7.91	7.35	7.87
Potri.001G459500	0.97	0.53	1.09	0.48	0.2	0.49	1	1.22	1.14	1.37	1.23	1.41	1.07	1.07	0.97	0.98	0.93	0.86
Potri.001G460300	0.48	0.4	0.41	1.53	2.29	1.7	1.08	1.17	1.26	0.86	1.06	1.32	0.93	0.52	0.79	0.44	0.71	0.55
Potri.001G461400	1.98	1.47	1.92	30.02	30.88	32.27	5.54	6.62	5.17	4.69	5.32	4.54	8.66	10.99	9.1	5.36	3.91	3.27
Potri.001G462800	5.16	4.59	4.88	17.62	20.54	17.99	11.09	11.74	11.39	10.54	9.93	9.72	8.48	9.4	9.9	8.02	8.51	7
Potri.001G463000	2.21	2.65	1.76	5.27	6.97	5.47	4.48	3.39	3.81	4.3	4.87	3.12	4.28	2.56	2.69	3.53	4.44	2.74
Potri.001G463400	0	0	0	0.29	0.61	0.79	0.07	0.05	0.13	0.02	0	0	0.04	0	0.04	0.03	0.04	0
Potri.001G463700	7.76	7.91	8.36	4.02	4.1	3.33	7.11	6.58	6.44	7.33	9.03	8.71	7.66	9.64	8.26	7.45	6.72	7.02
Potri.001G463900	0	0.06	0.12	0.63	0.63	0.67	0.65	0.77	0.73	0.68	0.43	1.26	0.62	0.24	0.44	0.27	0.17	0.26
Potri.001G464300	54.59	55.58	52.08	21.76	23.57	24.05	88.18	92.37	92.11	51.77	60.35	61.03	77.53	80.86	81.5	106.47	100.62	103.79
Potri.001G465400	0.02	0.16	0	1.33	1.43	1.22	0.02	0.56	0.39	0.36	0.17	0.21	0.2	0.33	0.47	0.49	0.3	0.41
Potri.001G465700	1.72	2.6	2.72	1.35	0.64	1.15	1.91	2.75	3.38	3.02	2.31	1.84	2.75	3.08	1.33	1.55	2.71	2.77
Potri.001G466100	4.54	5.51	5.17	1.95	2	2.79	3.78	3.46	4.36	4.46	4.19	5.14	6.31	6.14	7.58	5.7	4.17	6
Potri.001G467100	6.2	8.18	8.18	3.73	4.38	3.67	2.7	3.68	2.81	3.43	3.07	4.64	3.85	3.71	5.18	5.11	4.04	5.08
Potri.001G467300	1.52	1.36	1.26	4.02	4.22	3.64	1.83	1.55	1.21	1.31	1.66	1.22	1.56	1.44	1.35	1.27	1.29	1.19
Potri.001G467600	7.36	6.65	6.97	16.94	18.03	17.31	7.92	8.81	7.98	7.83	7.92	7.15	9.92	10.17	10.36	8.74	7.88	8.32
Potri.001G468100	15.49	12.21	13.36	18.03	15.66	17.65	2.79	2.65	2.71	4.12	5.34	4.97	8.07	6.89	7.88	9.94	8.79	10.77
Potri.001G468400	0.18	0.17	0.18	2.69	2.48	3.45	1.35	1.45	0.8	0.9	0.71	1.84	1.28	0.82	1.38	0.65	0.47	0.18
Potri.001G469400	0.1	0.05	0.17	1.17	1.09	0.95	0.68	0.47	0.7	0.38	0.06	0.48	0.75	0.51	0.13	0.3	0.19	0.3
Potri.001G469600	9.38	7.93	9.3	19.12	22.33	22.17	15.27	15.52	15.16	12.17	9.56	12.44	10.56	8.82	9.82	7.13	9.43	6.65
Potri.001G470100	1.22	0.97	1.14	2.61	2.21	2.58	1.86	1.32	1.67	1.13	0.86	1.03	1.44	1.3	1.46	1.43	1.3	1.06
Potri.001G470700	174.65	169.87	162.2	47.57	42.82	40.99	46.4	37.34	46.37	59.79	56	62.3	88.88	84.17	87.49	150.29	148.26	160.69
Potri.001G470800	1.26	1.16	1.29	15.74	16.75	14.98	4.8	4.99	5.05	4.83	4.61	4.4	4.84	6.07	5.85	3.03	3.92	3.13
Potri.001G471600	3.03	2.42	2.87	1.19	1.2	0.94	6.34	6.16	4.81	5.38	5.93	6.47	3.78	3.85	4.15	2.13	2.57	2.29
Potri.001G472400	13.14	12.43	13.59	5.42	5.15	5.46	10.87	10.26	10.81	11.19	14.2	13.8	10.15	10.05	10.28	11.47	11.82	10.73
Potri.001G472500	4.83	7.12	4.16	1.16	2.11	1.05	3.58	3.24	4.24	3.89	4.89	5.54	2.73	3.09	3.48	3.59	4.58	3.28
Potri.002G000800	36.18	35.75	33.85	16.7	17.27	16.55	30.73	32.28	31.53	36.68	39.15	39.16	30.47	29.04	29.93	34.03	33.13	33.78
Potri.002G001300	1.69	2.01	2.41	0.58	0.89	0.7	2.1	2.15	1.96	2.69	2.86	2.78	1.18	1.06	1.07	1.34	1.61	1.7
Potri.002G001400	18.05	18.06	17.58	2.36	2.07	2.43	16.15	18.23	17.49	11.67	12.05	12.26	15.29	15.35	14.66	28.88	26.47	27.58
Potri.002G001600	0.29	0.06	0.25	0.11	0.1	0.05	0.49	0.08	0.29	0.94	0.83	0.77	0.4	0.42	0.2	0.17	0.13	0.61
Potri.002G002100	0.64	0.41	0.15	0.11	0.09	0	0.83	0.33	0.06	0.15	0.25	0.23	1.47	0.86	0.98	1.49	1.23	1.68
Potri.002G002200	37.91	37.35	43.03	14.28	13.37	13.63	14.43	14.89	14.35	24.79	21.99	20.82	26.74	23.82	26.07	33.3	39.24	35.12
Potri.002G002300	1.96	1.82	1.9	0.16	0.09	0.15	0.13	0.57	0.4	0.23	0.64	0.3	1.44	1.29	0.81	2.07	1.35	0.84
Potri.002G002900	19.28	23.78	21.76	9.29	7.92	8.52	15.23	17.26	15.92	19.2	23.6	21.62	18.33	17.8	17.98	19.68	22.07	17.69
Potri.002G003000	21.3	19.02	19.77	10.44	10.35	10.56	19.91	19.83	20.28	20.64	19.66	20.82	20.53	19.39	17.65	16.36	19.53	20.16
Potri.002G003400	0.65	0.93	0.74	8.32	8.28	9.31	2.99	4.09	3.64	3.31	2.63	3.48	2.72	3.22	2.43	1.48	1.86	1.73
Potri.002G003800	1.8	2.19	2.87	4.59	5.52	6.19	1.31	1.59	1.97	3.02	1.8	2.68	3.64	3.68	4.17	1.81	2.01	2.42
Potri.002G004000	20.78	20.81	22.86	69.1	70.07	74.46	16.11	15.3	16.33	13.26	14.03	14.64	30.9	30.36	30.6	23.05	24.96	22.66
Potri.002G004100	26.49	27.13	25.63	25.08	24.56	26.87	11.88	11.63	12.91	14.7	13.28	14.71	24.72	24.04	26.01	25.69	26.47	28.3
Potri.002G004200	4.34	4.62	4.19	0.36	1.77	2.08	2.64	2.3	2.15	2.33	3.13	1.62	1.28	1.68	2.74	2.72	3.5	3.09
Potri.002G004300	1.71	1.14	1.16	0.25	0.05	0.3	0.73	0.29	0.6	0.83	0.89	1.7	0.8	0.57	0.69	0.8	1.25	0.74
Potri.002G004700	4.38	6.2	5.21	2.22	2.7	2.16	4.17	2.86	4.44	5.6	4.33	3.96	2.93	3.83	3.2	2.98	3.11	4.58
Potri.002G005000	4.31	4.18	4.22	11.56	10.49	11.03	5.3	6.8	6.85	8.24	6.17	5.85	6.62	6.24	6.46	3.37	4.06	4.6
Potri.002G005300	0.34	0.06	0.11	0.55	0.54	0.58	0.8	0.46	0.72	0.29	0.35	0.33	0.6	0.42	0.27	0.16	0.15	0.06
Potri.002G005500	0.52	0.29	0.42	1.04	1.24	1.31	0.77	0.86	0.89	0.79	0.49	0.48	2.24	1.66	1.55	1.82	1.84	1.93
Potri.002G005700	8.82	8.13	8.99	22.81	24.39	23.55	17.33	16.14	16.24	20.13	18.73	18	14.25	8.52	10.26	11.38	13.04	11.11
Potri.002G006100	0.99	0.94	0.95	1.08	0.91	0.84	0.12	0.2	0.02	0.45	0.63	0.19	0.57	0.54	0.96	0.72	0.6	0.65
Potri.002G007100	3.19	2.15	2.31	4.45	4.65	4.4	0.78	0.96	0.48	1.92	1.8	1.63	2	1.41	1.57	3.36	2.75	3.42
Potri.002G007300	12.28	11.41	13.22	41.88	43.03	44.08	21.12	21.76	24.67	16.51	16.82	16.6	15.76	16.7	16.94	13.42	10.16	11.76
Potri.002G007400	0.84	0.88	1.13	2.02	2.22	2.12	0.69	0.93	0.97	0.65	0.8	0.7	1.96	2	1.51	1.33	1.14	1.22
Potri.002G008700	0.29	0.27	0.48	1.16	1.32	1.11	0.32	0.68	0.49	0.36	0.37	0.62	0.49	0.43	0.24	0.42	0.26	0.22
Potri.002G008800	4.78	4.64	4.62	11.14	10.51	9.4	4.8	6.14	5.52	4.52	4.02	4.84	7.23	6.9	5.79	5.08	5.02	5.58
Potri.002G009800	529.05	531.06	510.72	214.87	215.93	206.07	376.91	384.08	378.3	467.75	461.82	457.94	330.08	331.47	333.06	440.84	444.52	421.97
Potri.002G010000	0.37	0.48	0.41	5.9	5.38	6.56	3.01	2.32	2.68	3.23	2.66	2.7	2.49	2.19	1.91	1.21	0.82	1.27
Potri.002G010100	126.46	128.97	129.69	14.57	14.47	13.42	63.65	62.3	63.98	85.23	84.51	88.49	48.94	51.69	51.71	83.81	85.49	87.22
Potri.002G010400	1.26	0.77	1.89	8.39	8.3	7.3	4.41	4.07	3.66	2.71	3.56	2.49	2.4	2.05	2.73	2.21	2.13	1.61
Potri.002G011700	0.4	0.26	0.13	1.64	1.66	1.55	0.53	0.78	0.82	0.61	1.08	0.72	0.71	0.95	0.45	0.31	0.25	0.3
Potri.002G012500	4.45	3.75	4.08	3.48	2.8	2.79	1.26	1.49	1.88	2.36	2.83	1.53	2.23	1.84	1.53	2.62	2.65	2.53
Potri.002G012900	0.78	0.72	0.81	1.94	2.11	2.48	0.88	1.33	1.25	0.54	0.61	0.71	1.5	0.76	0.79	0.62	1.49	1.68
Potri.002G013200	0.58	0.59	1	2.4	2.16	2.5	0.8	0.68	0.59	0.33	0.31	0.16	0.9	1.3	0.93	0.62	1.18	0.77
Potri.002G013400	0.32	0.23	0.22	1.48	2.05	1.45	0.43	0.39	0.44	0.18	0.23	0.04	0.43	0.36	0.69	0.39	0.52	0.24
Potri.002G013500	43.94	45.76	46.58	15.5	17.1	15.89	38.64	39.33	38.23	45.53	45.2	48.54	32.83	35.69	31.42	40.84	39.36	40.45
Potri.002G013700	5.49	6.79	5.5	30.04	31.36	31.04	11.78	11.36	10.58	9.39	11.63	9.4	14.04	13.71	13.51	8.58	9.9	10.41
Potri.002G014000	0.32	0.32	0.51	1.27	1.61	1.37	0.41	0.48	0.57	0.57	0.42	0.8	2.15	1.64	2.38	1.38	1.16	1.35
Potri.002G014100	2.68	3.29	2.9	7.85	7.78	8.38	3.06	2.11	2.4	1.9	2.01	1.65	2.83	3.1	2.56	3.37	2.51	2.63
Potri.002G014500	8.84	10.26	9.6	4.78	5.22	4.81	11.31	11.2	8.31	10.78	11.62	11.07	8.31	9.79	9.84	8.65	8.18	10.16
Potri.002G014600	0.72	0.97	1.78	0.27	0.29	0.43	2.21	2.35	2.44	2.06	2.06	2.35	1.21	0.82	1.65	1.38	1	1.11
Potri.002G014700	267.14	259.01	248.73	74.94	73.14	72.14	156.8	148.29	142.01	146.21	146.25	145.45	153.54	149.49	152.16	242.74	226.79	218.79
Potri.002G014800	4.26	3.96	3.97	2.62	1.62	1.99	3.95	2.74	3.17	3.74	3.76	3.98	5.88	5.96	4.95	4.96	4.37	4.94
Potri.002G014900	0.77	0.6	0.43	2.65	4.04	3.58	1.2	0.72	0.76	1	0.47	1.43	0.58	0.43	1.19	0.66	0.54	0.36
Potri.002G015100	349.8	336.76	337.28	559.16	548.97	547.41	730.73	726.05	710.64	565.61	571.43	555.36	570.96	550.11	558.43	327.24	327.16	345.08
Potri.002G015300	0.82	0.62	1.18	0.05	0.02	0.04	0.49	0.08	0.17	0.4	0.23	0.4	0.1	0.38	0.36	0.16	0.69	0.58
Potri.002G015400	18.04	16.7	18.58	4.05	4.56	4.17	11.39	9	9.77	12.1	12.77	10.49	10.12	12.26	11.71	13.92	14.84	13.19
Potri.002G016300	12.96	12.95	14.63	44.36	45.68	41.58	12.7	12.27	13.73	10.06	11.67	12.73	17.46	20.32	19.26	16.93	14.21	16.9
Potri.002G016500	1.34	2.77	1.46	1.72	2.27	2.42	2.95	3.66	3.12	2.47	3.88	4.72	4.64	3.39	4.05	3.01	3.47	3.42
Potri.002G017000	0.37	0.46	0.31	0.82	1.07	0.88	0.88	1.01	0.59	0.44	0.54	0.65	0.41	0.38	0.49	0.49	0.53	0.8
Potri.002G017200	18.38	19.13	20.15	6.37	6.44	6.86	5.91	6.54	6.65	4.27	4.11	4.78	4.18	4.52	4.53	8.52	7.67	6.74
Potri.002G017500	1.22	0.35	0.4	2.61	2.19	2.24	1.26	1	1.07	0.46	0.31	0.49	1.14	0.93	0.65	0.45	0.7	0.92
Potri.002G018000	0.41	0.63	0.24	7.11	7.79	5.88	2.24	2.91	1	1.34	1.22	1.22	0.92	1.63	0.86	0.3	0.4	0.86
Potri.002G018200	0.63	0.44	0.61	0.56	0.63	0.83	1.45	1.07	0.85	1.38	1.18	1.37	0.71	0.97	0.95	0.63	0.78	0.57
Potri.002G018300	52.8	48.63	49.78	157.33	153.82	157.83	64.97	66.51	64.73	39.6	40.6	42.41	83.4	83.95	79.13	34.22	34.17	34.84
Potri.002G018400	28.12	29.19	31.78	13.81	11.83	12.95	30.8	31.87	27.11	45.09	42.15	38.81	25.19	21.76	24.02	22.66	22.48	21.94
Potri.002G018800	0.11	0.2	0.08	1.26	1.3	1.39	1.03	0.69	0.74	0.56	0.47	0.44	1.2	1.11	1.14	0.32	0.46	0.3
Potri.002G019300	0.83	0.86	0.68	0.37	0.3	0.49	0.53	0.31	0.62	0.71	0.67	0.53	0.79	0.49	0.56	1.57	1.49	1.42
Potri.002G019800	18.34	17.21	19.12	18.75	16.39	16.61	8.25	7.43	7.45	12.02	10.12	10.18	12.13	11.66	11.81	14.26	12.3	13.94
Potri.002G020400	1.15	1.96	0.74	4.13	5.44	5.29	1.92	2.11	2.66	2.19	1.51	1.78	2.91	1.66	1.74	1.61	2.55	3.26
Potri.002G020700	122.52	122.41	124.66	19.4	19.62	17.9	104.86	105.2	99.31	131.16	123.74	127.13	63.23	60.66	66.58	109.87	115.18	105.2
Potri.002G021300	6.06	6.73	5.74	2.93	2.9	2.6	6.11	4.8	5.82	6.66	5.62	6.38	7.97	7.98	8.03	6.4	6.74	7.1
Potri.002G022600	469.65	467.6	448.98	46.43	45.95	42.83	313.87	327.11	317.08	270.72	254.36	250.21	268.34	265.2	275.15	575.03	542.91	553.74
Potri.002G022700	7.51	6.55	8.07	1.61	2.11	2.55	21.59	23.59	19.54	11.83	12.35	11.77	9.99	4.24	5.59	6.27	9.07	7.55
Potri.002G022800	25.44	25.37	24.14	6.65	6.58	6.84	27.53	27.56	27.74	33.42	33.02	32.78	20.96	19.68	20.86	22.82	22.9	22.81
Potri.002G023000	14.72	13.28	13.84	6.01	4.62	6.04	12.73	11.21	12.82	12.59	10.49	11.33	8.81	10.82	12.33	10.82	12.13	14.79
Potri.002G023200	5.75	6.3	6.08	14.16	16.77	15.69	8.35	8.11	8.78	6.86	7.42	6.97	7.39	7.79	7	6.78	6.42	6.03
Potri.002G023600	10.38	10.41	9.93	15.53	15.87	14.88	2.26	2.51	3.18	2.98	3.12	3.16	9.05	7.33	8.19	9.66	9.21	8.55
Potri.002G024000	15.5	13.16	12.84	2.57	2.56	2.56	8.2	7.34	6.71	12.17	12.48	11.61	5.43	5.85	5.55	11.63	12.77	13.5
Potri.002G024100	19.36	19.76	20.11	9.96	10.37	10.21	15.93	15.91	16.22	20.37	20.5	20.36	16.08	17.74	15.62	17.97	18.29	16.17
Potri.002G024200	4.97	4.64	4.85	10.68	11.55	12.03	4.26	4.59	3.75	4.18	5.33	5.66	6.96	5.93	7.51	5.66	5.44	5.89
Potri.002G024400	10.9	12.98	12.46	38	36.38	37.27	23.58	21.42	22.35	19.15	21.06	18.45	18.9	20.3	20.96	14.17	15.39	15.29
Potri.002G024900	5.46	5.46	6.4	11.57	11.04	14.65	6.55	6.13	6.02	5.66	6.48	6.75	6.44	7.79	8.17	6.26	6.66	6.34
Potri.002G025300	1.5	1.37	1.65	0.43	0.59	0.47	0.09	0.2	0.13	0.19	0.06	0.04	0.44	0.4	0.46	0.19	0.03	0.07
Potri.002G025500	0.07	0.37	0.22	1.18	0.97	1.25	0.48	0.47	0.49	0.43	0.17	0.29	0.38	0.4	0.28	0.58	0.49	0.51
Potri.002G025800	0.11	0.15	0.07	0.91	0.47	0.66	0.22	0.17	0.39	0.36	0.2	0.06	0.17	0.23	0.16	0.31	0.24	0.45
Potri.002G026300	0.04	0.13	0.24	0.55	0.52	0.46	0.14	0.11	0.26	0.18	0.31	0.16	0.14	0.18	0.2	0.35	0.18	0.25
Potri.002G027000	0.78	0.58	0.89	1.05	0.76	0.47	0.83	0.89	0.41	0.25	0.28	0.17	0.91	1.72	1.14	1.15	1.16	1.28
Potri.002G027400	0.21	0.12	0.25	0.84	1.49	1.08	0.43	0.59	0.82	0.27	0.54	0.19	0.27	0.48	0.38	0.44	0.39	0.32
Potri.002G027700	3.46	4.26	3.35	0.91	0.86	1.19	2.65	1.52	2.76	2.23	3.68	3.61	3.08	3.85	4.28	4.58	3.29	3.04
Potri.002G027800	4.19	4.25	4.88	1.31	1.24	1.04	2.89	2.54	2.65	2.35	3.64	3.25	5.13	5.81	5.01	4.4	4.1	4.06
Potri.002G028800	10.33	8.57	7.71	84.65	78.04	74.16	24.73	26.79	24.63	17.13	18.51	19.5	14.83	19.41	19.7	10.63	9.99	9.95
Potri.002G029000	1.46	1.71	1.27	0.53	0.77	0.44	1.53	1.08	1.09	1.28	1.65	1.56	1.8	1.26	1.34	1.67	1.17	1.39
Potri.002G029100	95.12	92.54	89.54	269.12	272.91	266.98	110.55	106.45	103.87	150.53	138.2	146.18	121.6	124.05	122.5	114.71	108.8	110.74
Potri.002G030200	9.7	9.5	7.99	3.49	4.54	4.29	6.25	7.22	6.15	6.95	6.61	8.23	7.47	8.9	8.17	8.05	7.69	9.12
Potri.002G030500	1.25	1.76	1.93	0.31	0.36	0.6	0.64	0.82	0.36	0.97	0.94	0.86	0.31	0.53	0.51	0.31	0.27	0.34
Potri.002G031000	2.01	2.49	2.01	9.27	9.19	9.21	8.77	7.7	8.55	8.1	7.15	6.91	6.75	4.53	5.6	4.71	4.34	4.02
Potri.002G031200	6.8	6.48	6.35	1.12	1.19	1.58	6.86	6.42	6.28	7.69	8.86	7.89	5.83	6.09	5.3	6.02	5.91	5.89
Potri.002G032200	1.62	1.59	1.43	5.73	7.23	5.79	1.52	2.58	2.13	1.66	1.64	1.33	2.14	1.91	2.32	1.86	1.72	1.43
Potri.002G032700	8.37	10.56	9.14	0.3	0.13	0.28	9.5	8.32	9.37	6.91	5.83	7.5	7.76	9.66	8.41	9.31	9.2	9.93
Potri.002G033000	29.74	32.38	29.67	74.19	72.53	73.75	28.66	28.11	29.12	32.8	32.6	32.57	34.91	30.18	33.28	26.59	27.25	24.52
Potri.002G033100	0.38	0.54	0.49	0.25	0.12	0.09	0.08	0.14	0.05	0.09	0.07	0.19	0.05	0.03	0.05	0.3	0.08	0.06
Potri.002G033400	37.09	37.46	37.36	27.73	28.17	29.81	17.73	15.8	17.01	14.99	15.66	16.93	34.79	36.07	35.33	37.45	36.75	35.25
Potri.002G033600	2.94	2.55	2.95	20.84	19.54	17.6	1.58	2.49	2.59	1.69	1.24	1.53	5.39	6.05	6.54	3.3	2.91	5
Potri.002G034300	0	0.4	0.79	1.05	1.56	0.87	2.69	1.56	2.95	3.32	2.84	1.98	0.48	0.48	1.56	0.55	1.88	0.41
Potri.002G034400	94.97	96.32	96.68	726.81	731.68	694.29	455.77	423.56	437.88	290.72	280.87	261.28	304.38	231.28	262.25	163.65	175.57	168.25
Potri.002G034500	24.57	20.83	20.84	3.78	4.2	4.41	33.43	31.4	32.21	42.42	47.05	46.12	16.34	15.24	15.65	13.9	17.3	14.48
Potri.002G034700	1.42	1.16	1.36	1.98	3.86	3.54	3.37	2.02	2.4	2.08	2.22	1.48	2.34	1.63	1.25	1.76	3.05	2.16
Potri.002G034800	0.37	0.22	0.06	0.88	1.18	1.22	0.79	0.79	0.58	0.64	0.55	0.36	0.87	0.29	0.3	1.22	0.73	0.65
Potri.002G036300	4.53	4.48	3.62	9.9	10.05	8.6	3.78	4.17	3.42	2.97	4.14	4.18	6.47	4.17	5.5	5.35	5.4	5.13
Potri.002G036700	2.46	2.94	2.14	7.2	8.24	7.25	2.25	3.09	2.84	2.1	2.18	2	3.49	3.85	3.36	3	2.51	3.27
Potri.002G036900	5.04	4.12	4.19	2.17	1.45	2.09	4.19	4.15	4.26	4.69	4.41	4.02	2.01	2.26	2.69	3.3	3.02	2.59
Potri.002G037400	5.03	4.38	4.77	12.12	10.08	11.1	3.71	5.78	6.49	5.07	4.45	4.36	6.38	5.52	6.16	5.24	6.14	6.21
Potri.002G038200	0.74	0.99	1.18	4.37	3.46	3.43	1.53	2.9	1.88	2.58	1.5	2.04	1.26	1.21	1.92	0.98	1.5	1.24
Potri.002G038500	0.85	0.7	0.88	0	0.07	0.07	0.56	1.14	0.95	0.2	0.55	0.8	0.97	1.46	0.92	1.38	1.2	1.71
Potri.002G038600	0.84	0.81	1.27	0.11	0.32	0.33	0.35	0.33	0.26	0.45	0.48	0.68	0.59	0.39	0.44	0.52	0.41	1.27
Potri.002G038800	46.07	42.91	42.22	101.98	100.43	103.57	75.93	74.23	74.75	52.87	52.34	53.31	46.51	43.98	47.42	48.16	45.61	46.12
Potri.002G039800	3.6	4.52	4.97	1.33	1.31	1.83	2.28	2.66	1.89	2.92	3.37	2.16	3.47	3.63	3.83	3.04	3.96	3.73
Potri.002G040100	1.15	0.88	0.57	2.98	3.43	3.56	0.71	0.89	0.89	1.21	0.53	0.78	1.19	0.72	1.21	0.63	0.95	0.74
Potri.002G040700	1.36	1.9	1.17	2.09	1.7	1.29	2.22	2.37	2.11	1.99	1.6	1.62	3.76	3.46	3.24	2.21	2.82	2.25
Potri.002G041000	5.23	4.99	4.13	2.27	2.38	1.82	4.08	4.1	3	5.68	4.4	4.72	4.85	4.84	4.47	4.21	5.19	5.68
Potri.002G041500	5.48	6.32	7.25	7.94	8.04	7.31	3.67	3.56	3.22	2.21	2.58	2.55	3.95	3.43	3.55	3.88	4.51	7.15
Potri.002G042200	3.53	3.51	3.68	2.6	2.49	2.5	8.64	7.01	7.07	2.48	2.13	2.12	3.57	2.9	3.14	2.88	2.23	3
Potri.002G042900	0.04	0.16	0	0.89	0.87	0.71	0.08	0.1	0.1	0.27	0	0.32	0	0	0.11	0.03	0	0.08
Potri.002G043000	1.1	1.5	0.69	0.3	0.51	0.4	0.44	0.71	0.41	0.48	0.39	0.54	0.32	0.18	0.66	0.71	0.28	0.57
Potri.002G043100	33.05	32.58	32.51	111.76	112.34	112.71	34.52	33.74	33.26	20.11	18.64	19.63	39.8	37.16	38.27	30.84	30.6	35.66
Potri.002G044800	0.64	0.96	1.24	3.18	3.01	3.24	2.01	2.07	2.84	0.87	1.36	1.58	1.91	1.66	1.79	1.44	1.61	1.21
Potri.002G045100	3.74	3.04	3.33	13.63	12.74	11.43	4.15	3.84	3.89	3.66	3.72	2.32	5.54	5.39	4.43	3	3.2	3.4
Potri.002G046200	9.85	8.44	9.71	0.73	1.11	1.4	6.49	5.67	5.95	7.4	6.94	7.19	5.27	3.86	4.75	6.73	7.78	6.72
Potri.002G046400	4.06	4.23	3.17	32.81	26.86	27.86	21.69	22.45	22.71	16.88	18.59	17.72	9.33	8.56	9.26	4.18	3.6	4.68
Potri.002G046700	1.52	1.69	1.19	3.71	2.93	3.29	2.18	1.7	2.42	1.79	1.65	1.77	1.76	2.17	2.02	1.57	1.03	1.33
Potri.002G047400	6.02	7.12	5.43	2.94	2.09	2.57	6.06	4.95	4.35	6.47	6.13	6.04	4.91	4.37	5.19	4.87	5.1	4.92
Potri.002G047500	0.17	0.47	0.63	0.31	0.43	0.53	0.53	0.57	0.81	0.39	0.27	0.47	0.49	0.94	1.35	0.92	1.33	1.02
Potri.002G047600	0.5	0.45	0.48	0.05	0.08	0.02	0.31	0.06	0.26	0.3	0.34	0.39	0.26	0.31	0.14	0.52	0.33	0.28
Potri.002G047800	17.3	17.5	16.92	6.47	7.22	7.1	18.2	20.26	18.9	24.95	24.92	21.46	14.93	14.51	14	14.79	15.29	15.64
Potri.002G047900	1.13	1.63	1.4	0.64	0.43	0.86	1.71	2.34	1.1	1.36	2.36	1.94	1.09	1.29	1.2	1.19	1.57	1.56
Potri.002G048200	8.73	7.51	8.79	1.66	2.07	2.04	16.84	15.95	16.32	16.79	16.26	18.42	6.63	7.58	7.56	7.73	7.69	6.68
Potri.002G048600	0.4	0.55	0.31	4.1	4.34	4.72	2.22	1.81	1.51	1.76	1.11	1.84	1.03	1.08	1.41	0.56	0.88	0.51
Potri.002G048900	0.37	0.33	0.57	1.75	2.11	1.48	0.64	1.01	0.86	0.51	0.5	0.37	0.93	0.64	0.87	0.62	0.62	0.95
Potri.002G049000	71.63	73.96	65.07	20.26	18.46	18.77	85.81	85.8	87.07	77.67	69.78	72.92	59.05	59.95	61.55	72	71.04	66.14
Potri.002G049400	13.22	13.42	12.58	50.63	54.46	50.53	46.69	46.64	46.88	55.4	55.7	49.49	25.02	20.66	21.12	17.57	19.79	16.94
Potri.002G049500	0.09	0.11	0.09	0.99	0.6	0.99	0.34	0.67	0.51	0.1	0.15	0.15	1.06	0.95	1.04	0.26	0.62	0.34
Potri.002G049800	9.1	6.41	7.64	17.5	18.29	18.21	9.96	9.25	7.22	10.17	7.63	8.88	10.59	9.27	9.64	8.59	9.55	7.82
Potri.002G050200	0.36	0.45	0.17	3.83	3.83	3.32	2.42	1.88	1.79	3.08	1.07	1.26	2.55	1.39	1.31	0.19	0.14	0.36
Potri.002G050300	0.22	0.64	0.92	4.83	4.64	4.04	1.82	2.15	2.53	2.81	0.59	1.22	1.59	1.64	0.36	0.37	0.82	0.37
Potri.002G050400	3.92	3.43	5.6	36.35	37.4	35.17	23.57	21.54	22.38	17.87	19.95	17.54	12.55	11.82	12.75	4.29	3.18	3.2
Potri.002G050500	0.31	0.15	0.38	1.42	2.05	0.7	0.73	0.18	0.35	0.25	0.53	0.17	0.22	0.29	0.35	0.26	0.63	0.47
Potri.002G051100	0.69	1.01	0.43	0.48	0.98	1.71	0.1	0.17	0.06	0	0.37	0	0.81	0.74	0.64	0.46	0.24	1.31
Potri.002G051200	5.68	5.85	7.42	1.82	2.01	1.92	6.28	4.99	4.65	7.11	7.49	6.08	6.68	5.77	5.47	6.33	5.96	4.79
Potri.002G052000	2.21	1.2	2.02	0.47	0.19	0.3	0.65	0.94	1.18	0.48	0.92	0.73	1.06	0.86	1.04	1.03	1.01	0.89
Potri.002G053000	26.31	26.54	27.23	23.13	19.4	21.38	10.34	9.24	8.62	11.97	13.14	11.79	16.26	15.18	16.12	16.83	15.32	18.13
Potri.002G053100	0.94	1.41	0.76	6.37	7.31	8.26	3.35	3.15	2.9	2.45	3.25	2.81	4.02	3.1	3.18	2.05	1.17	1.66
Potri.002G053400	0.11	0.31	0.11	0.94	1.06	0.76	0.24	0.13	0.48	0.43	0.49	0.57	0.58	0.35	0.86	0.67	0.67	0.91
Potri.002G054300	0.22	0.35	0.52	5.3	6.97	6.49	2.65	3.23	1.62	0.27	0.49	0.94	1.47	0.79	1.18	0.45	0.43	0.9
Potri.002G054900	21.55	22.73	21.55	4.44	5.35	4.82	13.88	13.93	12.97	24.27	21.63	23.1	20.51	19.39	18.85	28.34	26.5	27.53
Potri.002G055200	2.76	2.59	3.16	7.75	7.59	6.93	2.76	2.85	2.71	2.29	2.95	3.46	3.91	3.88	3.96	3.17	2.57	3.28
Potri.002G056400	35.25	37.39	40.61	19.03	19.43	18.11	40.26	35.4	36.16	40.32	33.07	36.86	27.09	25.47	25.93	35.13	33.58	31.19
Potri.002G056800	10.51	10.32	9.91	11.93	11	11.16	2.79	3.09	3.21	3.75	2.56	3.17	9.74	8.34	9.06	8.31	10.01	8.72
Potri.002G057000	0.52	0.87	0.74	4.27	3.97	3.54	2.67	3.33	2.77	2.23	2.75	3.13	1.54	1.38	1.47	0.56	0.65	0.92
Potri.002G057700	6.3	5.79	6.48	21.47	23.04	21.18	4.77	5.02	5.04	4.87	3.91	4.43	6.67	5.97	6.46	6.92	5.44	6.07
Potri.002G057900	1.08	1.14	1.73	11.19	8.55	10.56	5.29	3.82	5.2	3.49	2.96	3.15	2.97	2.61	2.28	1.6	2.36	2.09
Potri.002G058000	22.48	20.05	23.15	22.85	21.25	21.11	8	12.94	11.18	11.22	12.28	13.5	17.92	16.56	18.7	23.65	16.56	20.35
Potri.002G058700	2.84	2.62	3.33	6.28	6.64	6.79	4.77	4.71	4.49	2.9	2.97	3.07	3.76	4.62	4.24	4.71	4.24	4.96
Potri.002G059000	8.49	8.22	8.86	24.53	27.03	24.92	15.44	14.82	16.87	14.91	14.43	14.76	15.93	13.56	14.86	10.91	11.27	10.93
Potri.002G059100	7.18	6.36	7.19	15.28	16.31	14.53	6.35	6.34	6.65	8.35	7.87	6.78	8.17	8.42	8.1	9.21	9.51	7.85
Potri.002G059200	0	0	0.03	0.34	0.44	0.25	0	0.04	0.04	0.1	0.08	0	0.15	0.08	0.08	0	0	0.26
Potri.002G059600	2.3	2.43	3.43	7.13	7.79	7.8	4.79	4.02	4.88	3.68	4.02	5.26	4.46	3.45	3.81	2.65	3.2	3.27
Potri.002G060300	3.77	3.89	3.78	11.3	9.82	11.75	2.05	2.72	2.43	2.81	2.2	2.01	4.39	4.49	5.67	2.64	2.82	2.66
Potri.002G060500	8.75	7.2	7.71	1.28	1.01	1.15	10.11	8.77	7.96	5.84	4.96	4.86	12.18	10.53	11.18	21.57	20.77	22.76
Potri.002G060700	0.37	0.44	0.37	0.11	0.03	0.17	0.37	0.4	0.23	0.3	0.64	0.39	0.22	0.15	0.33	0.12	0.27	0.39
Potri.002G060800	10.33	10.53	10.61	15.38	15.06	16.14	10.98	15.39	12.65	6.13	7.87	6.91	11.87	13.32	12.5	4.08	4.12	4.48
Potri.002G060900	0.36	0.21	0.24	1.12	2.08	2	0.38	0.63	0.29	0.13	0.12	0.4	0.21	0.49	0.66	0.18	0.16	0.1
Potri.002G062800	0	0.02	0.16	0.95	1.1	0.96	0.12	0.18	0.36	0	0.06	0	0.15	0.24	0.25	0.09	0.05	0
Potri.002G063300	0.29	0.46	0.45	0.2	0.38	0.42	0.55	0.21	0.42	0.82	0.95	0.66	1.28	0.84	1.17	0.76	0.86	0.69
Potri.002G063700	6.17	5.6	5.2	15.44	15.82	16.61	5.17	5.23	5.19	5.76	6.28	6.56	6.91	6.14	6.7	6.88	7.47	5.71
Potri.002G064000	27.15	28.87	25.92	9.29	7.88	7.93	18.73	17.36	16.48	23.36	23.52	19.69	22.44	22.95	23.92	27.7	24.99	28.11
Potri.002G064100	9.3	9.66	10.23	3.18	4.67	2.97	9.34	8.37	7.39	9.85	9.76	8.94	6.33	7.62	8.25	10.18	8.48	10.87
Potri.002G064400	77.12	79.62	79.55	36.62	39.33	38.62	71.96	67.09	69.58	71.14	75.16	76.97	62.92	72.11	62.27	73.19	71.75	72.62
Potri.002G064500	2.46	4.19	4.47	0.76	0.45	0.84	6.8	6.82	6.65	9.59	10.05	8.5	4.34	3.97	3.62	3.01	3.47	4.37
Potri.002G064600	9.38	10.92	9.76	3.98	5.5	2.56	13.19	15.89	12.98	15.48	14.87	15.57	8.35	9.52	10.02	8.83	8.73	8.7
Potri.002G065600	17.67	19.08	17.38	0.71	0.49	0.6	6.22	5.92	5.85	14.14	11.83	12.88	11.25	11	9.74	17.75	18.57	17.41
Potri.002G066400	0.26	0.17	0.21	0.78	0.72	0.6	0.77	1.1	0.67	0.71	0.82	0.9	0.25	0.72	0.45	0.32	0.42	0.33
Potri.002G066600	9.09	10.81	10.15	27.72	29.76	30.56	15.32	14.69	15.37	13.25	13.47	12.61	17.14	19.01	17.43	10.61	9.56	10.06
Potri.002G067300	0.57	0.41	0.28	0.02	0	0	0.09	0	0.04	0	0.11	0.05	0	0.04	0	0.54	0.41	0.07
Potri.002G067700	3.32	3.96	2.74	0.96	0.8	1.03	1.92	2.6	2.31	2.46	1.81	2.26	1.58	2.58	2.31	3.45	3.62	3.38
Potri.002G068000	8.66	8.06	10.54	2.05	2.93	2.36	2.29	2.77	2.82	3.61	4.9	3.09	3.52	2.39	2.15	3.48	3.28	3.2
Potri.002G068100	38.37	32.89	35.59	9.63	9.28	7.22	19.83	18.31	20.12	39.72	36.58	37.18	21.15	16.31	21.28	24.63	24.49	20.73
Potri.002G069000	2.89	2.57	2.34	3.29	3.15	3.24	0.64	0.28	0.37	0.86	0.52	0.82	0.99	0.53	0.74	1.13	1.24	1.17
Potri.002G069400	5.68	4.31	3.43	18.93	21.72	20.84	5.28	3.2	5	3.59	4.85	3.93	4.82	4.67	4.88	2.54	3.01	3.54
Potri.002G070100	14.15	15.08	14.24	15.52	16.98	15.79	15.45	19.37	18.44	22.42	22.22	20.17	32.92	29.35	31.31	21.3	26.05	21.89
Potri.002G070500	2.51	3.85	2.34	2.15	1.84	1.27	3.58	3.92	3.51	2.2	2.19	2.94	5.89	2.94	4.79	8.58	9.23	8.42
Potri.002G070800	0.73	0.38	0.55	1.66	1.59	2.05	0.52	1.1	0.92	0.59	0.7	0.49	0.57	0.53	0.84	0.63	0.67	0.61
Potri.002G070900	4.81	4.18	4.06	13.44	12.35	14.46	8.86	8.54	9.64	9.08	9.31	9.16	8.22	7.87	8.74	5.01	5.07	4.94
Potri.002G071900	10.42	11.55	9.94	26.62	27.49	28.61	14.54	14.56	16.45	14.43	14.78	14.71	16.43	15.09	14.66	14.68	13.93	15.9
Potri.002G072000	1.39	1.05	2.35	4.99	5.06	5.64	2.62	1.95	1.84	3.29	2.14	2.9	1.6	1.33	1.86	2.69	2.98	2.1
Potri.002G072200	0.77	0.73	0.91	3.79	4.7	4.32	2.25	1.62	2.38	1.29	1.69	0.92	0.93	1.44	1.76	1.14	1.77	1.34
Potri.002G072400	31.82	36.04	34.97	31.68	32.7	34.27	14.2	15.35	15.42	17.28	14.83	14.57	27.34	28.57	27.96	27.94	30.11	28.59
Potri.002G073000	35.46	37.6	37.87	46.02	40.57	43.82	14.89	12.81	11.44	14.41	17.3	14.63	22.64	19.8	24.98	30.41	25.34	30.45
Potri.002G074700	22.78	24.84	21.74	10.88	11.33	11.55	13.51	15.42	14.45	12.64	14.68	14.16	12.87	11.87	12.06	22.62	20.77	23.64
Potri.002G075400	16.23	13.82	15.74	41.96	39.6	40.71	27.7	28.65	27.54	22.73	23.2	22.47	18.17	17.85	17.61	16.77	20.27	17.13
Potri.002G075900	0.66	0.73	0.41	0.91	1.05	0.88	1.57	1.45	1.56	0.75	0.86	0.8	1.04	1	0.91	1.49	1.04	1.66
Potri.002G076000	1.28	0.93	1.1	1.61	1.9	1.49	2.5	2	2.85	1.3	0.77	1.21	1.92	1.47	1.91	2.15	2.86	2.34
Potri.002G076200	0.31	0.32	0.25	4.72	4.71	3.76	2.51	1.78	1.56	1.8	1.54	1.46	1.48	1.22	1.59	1.6	1.19	0.86
Potri.002G076600	7.97	9.15	10.06	4.81	2.6	5	3.27	3.54	3.14	3.15	3.13	2.91	8.99	5.98	10.53	14.62	12.34	11.36
Potri.002G077600	1.95	2.11	1.35	3.03	2.56	2.62	0.63	0.65	0.99	0.85	0.83	0.89	2.73	2.05	2.26	2.15	1.63	1.17
Potri.002G077700	12.63	12.04	13.92	6.45	6.82	6.98	11.38	10.61	10.66	12.75	14.06	13.35	10.46	11.83	11.52	12.35	10.81	10.9
Potri.002G078600	0.37	0.61	0.26	21.27	21.78	20.9	6.29	6.76	7.53	9.51	6.44	5.67	1.75	1.08	1.17	1.02	0.72	0.46
Potri.002G079700	1.81	2.3	1.58	0.89	0.76	0.73	2.54	2.2	2.48	2.8	2.97	2.73	1.78	2.08	2.55	2.49	3.04	3.04
Potri.002G080000	1.06	0.79	0.67	6.23	6.31	5.14	3.55	3.16	3.66	2.99	2.99	3.18	2.46	2.64	3.01	2.03	1.49	1.29
Potri.002G080200	0.03	0.09	0.12	0.78	1.46	1.15	0.26	0.1	0.34	0.25	0.54	0.28	0.17	0.54	0.16	0.16	0.08	0.65
Potri.002G080300	2.53	2.81	2.91	1.22	1.55	1.22	2.06	2.18	1.4	2.2	2.2	2.42	2.94	2.87	2.8	2.71	2.66	2.73
Potri.002G080700	0.04	0	0.03	1.24	1.05	0.96	0.92	0.64	0.97	0.87	0.79	0.88	0.23	0.11	0.12	0.04	0.22	0.02
Potri.002G081000	73.19	72.7	69.13	16.3	17.76	18.08	50.79	51.9	52.86	50.65	51.46	49.66	56.7	51.7	52.9	80.36	77.42	82.97
Potri.002G081100	0.63	0.61	0.4	0	0.02	0.03	0.62	0.77	0.51	0.94	0.69	0.96	0.54	0.43	0.51	0.42	0.42	0.74
Potri.002G081300	18.88	17.72	18.31	5.19	5.43	4.59	13.75	12.37	13.12	16.1	14.72	15.76	11.54	13.8	13.09	15.89	14.41	15.82
Potri.002G081400	2.22	2.85	2.77	1.22	1.06	0.69	1.63	1.26	1.73	2.14	2.16	1.98	2.4	1.66	1.51	2.25	2.24	1.91
Potri.002G082100	101.93	100.22	96.66	169.85	167.56	163.67	167.03	162.71	165.82	149.43	147.22	156.76	228.44	237.45	233.2	118.38	120.49	120.64
Potri.002G082200	1.11	2.21	1.74	3.36	4.04	3.65	1.85	0.89	1.88	1.62	1.64	2.16	1.9	2.24	2.35	1.61	1.28	1.51
Potri.002G082400	36.67	35.98	36.81	17.01	15.8	18.26	43.62	42.97	39.71	34.05	35.32	34.76	34.36	34.02	34.89	39.14	42.57	37.48
Potri.002G083000	2.61	4.95	3.53	0.7	0.69	0.47	1.74	1.22	1.04	1.36	2.65	1.91	2.3	3.31	1.99	4.01	3.73	3.07
Potri.002G083100	20.63	24.76	23.78	8.01	8.36	9.87	39.18	40.18	35.45	30.81	22.92	25.21	23.99	21.81	21.56	28.11	27.6	26.83
Potri.002G083200	20.22	21.34	20.35	21.29	23.17	20.96	7.47	8.6	8.73	7.49	7.8	7.25	14.72	13.5	14.17	14.79	15.25	14.68
Potri.002G083300	12.98	12.66	14.52	7.3	8.36	7.31	3.46	5.2	4.65	4.68	5.22	5.59	11.4	10.43	8.56	13.32	11.84	12.38
Potri.002G083500	69.78	68.71	67.67	112.29	108.71	109.43	33.41	34.75	32.34	39.83	37.8	40.93	65.73	64.96	64.87	52.25	53.79	54.54
Potri.002G085100	9.36	11.49	8.91	36.09	39.43	39.32	10.7	11.33	9.43	9.56	8.07	9.07	7.77	6.03	7.88	10.06	8.31	9.77
Potri.002G085600	2.48	2.19	2.03	0.3	0.33	0.28	3.1	4.26	4.37	2.95	1.94	3.21	2.63	2.92	2.76	3.95	2.98	3.37
Potri.002G087100	1.54	1.23	1.41	3.53	4	4.26	3.02	2.43	2.65	0.98	2.32	1.03	2	1.11	1.19	1.65	3.37	2.89
Potri.002G087400	2.37	2.88	3.1	0.76	0.75	0.73	1.87	1.48	1.88	2	2.46	2.03	3.48	3.29	2.91	3.28	2.41	3.26
Potri.002G087600	0.68	0.32	0.48	1.83	1.68	1.9	1.41	1.55	1.38	1.2	1.64	2.09	0.67	0.99	0.93	0.47	0.76	0.52
Potri.002G089000	6.08	6.2	11.51	4.89	5.28	6.96	4.69	3.66	2.99	5.6	2.79	5.39	2.77	3.54	2.79	1.87	2.34	2.62
Potri.002G089800	5.21	4.48	4.92	5.32	5.81	4.26	3.29	2.19	2.27	2.9	2.34	1.81	4.6	5.59	4.63	8.25	6.26	6.99
Potri.002G091000	27.48	27.4	26	15.39	13.47	12.18	20.53	18.83	19.02	20.06	21.7	22.49	24.08	22.03	23.88	23.34	25.13	26.24
Potri.002G091600	0.53	0.94	0.61	1.86	1.75	2.05	0.64	1.55	0.51	0.47	0.25	0	0.7	0.74	0.43	2.58	2.04	2.7
Potri.002G092100	3.13	3.66	3.87	13.13	14.55	13.82	3.74	3.34	3.35	3.09	2.14	2.6	3.83	3.16	3.86	4.75	4.75	5.73
Potri.002G092200	5.52	5.87	5.4	0.11	0.02	0	2.41	2.02	1.73	3.52	2.71	2.44	1.68	1.37	1.35	2.16	2.81	0.81
Potri.002G092600	10.04	10.8	10.88	5.73	5.06	6.1	8.28	8.62	7.19	9.52	7.56	8.94	11.62	10.26	12.22	8.91	10.03	9.68
Potri.002G093100	86.95	75.7	82.35	324.31	313.92	315.94	96.77	99.33	94.43	69.79	71.33	72.58	149.75	138.38	145.27	107.15	110.21	114.14
Potri.002G093300	7.61	8.1	6.4	32.33	28.26	31.71	6.52	6.48	5.78	5.54	4.84	4.88	20.78	18.53	19.89	8	7.46	8.73
Potri.002G094000	10.78	10.83	11.47	32.48	33.35	33.09	10.86	10.33	12.89	7.54	8.32	8.24	16.6	17.41	16.95	14.61	12.88	12.48
Potri.002G094100	133.15	129.21	135.03	39.85	41.62	44.13	106.21	110.43	112.47	106.62	108.97	108.3	100.42	109.92	109.28	130.48	129.98	133.79
Potri.002G095900	0.4	1.23	1.13	1.81	2.29	2.32	0.67	0.73	1.07	0.94	0.68	0.88	1.71	1.7	1.99	0.91	1.17	0.88
Potri.002G096200	0.23	0.22	0.19	1.54	2.05	2	1.12	0.86	1.17	0.67	0.18	0.33	0.44	1.15	0.76	0.76	0.78	0.7
Potri.002G096600	51.67	50.6	53.15	22.83	26.08	22.29	60.59	57.82	61.57	72.38	75.76	71.89	42.92	46.74	43.66	44.51	45.05	48.71
Potri.002G096800	0.57	0.49	0.26	1.6	2.06	1.63	2.04	1.14	1.96	1.93	2.49	1.61	1.59	0.7	1.09	0.72	0.88	0.44
Potri.002G097000	1.57	0.94	1.18	0.15	0.32	0.24	0.61	0.22	1.01	1.45	1.33	1	1.02	0.62	0.37	0.88	0.76	0.68
Potri.002G097500	51.68	53.8	50.28	41.13	40.4	43.1	98.2	97.35	95.43	119.29	118.31	115.62	71.56	65.91	70.34	47.94	50.22	50.98
Potri.002G097700	8.23	6.84	8.08	3.94	3.69	3.33	5.83	6.3	5.82	6.91	7.82	8.11	6.75	7.37	6.93	7.73	8.23	7.15
Potri.002G098300	17.05	15.98	18.39	7.92	8.38	7.88	5.71	5.23	5.08	6.81	7.49	6.5	8.33	8.04	8.55	12.66	11.89	12.18
Potri.002G098400	0.19	0.52	0.51	0.36	0.34	0.33	0.4	0.41	0.43	0.1	0.47	0.3	0.4	0.33	0.5	1.04	1.54	1.72
Potri.002G098800	8.08	9.18	7.51	0.27	1.43	0.92	9.51	9.82	8.79	3.99	3.26	3.44	11.15	9.95	11.88	26.91	30.62	28.25
Potri.002G099300	0.26	0.3	0.11	1.24	0.88	1.67	0.64	0.36	1	0.22	0.12	0.16	0.91	0.52	0.68	0.38	0.3	0.26
Potri.002G100200	8.93	7.76	8.28	29.03	27.81	25.9	12.86	13.99	12.27	10.68	7.64	11.62	12.72	13.89	12.2	14.07	13.75	11
Potri.002G100500	0.12	0.56	0.6	0.21	0.08	0.37	0.77	0.59	0.38	0.38	0.62	0.33	1.24	0.72	1	1.41	1.83	1.99
Potri.002G100600	1.63	1.71	2.28	26	23.13	22.91	5.81	6.36	4.65	4.01	3.52	3.64	5.31	6.25	5.82	2.27	3.63	2.77
Potri.002G101100	1.38	1.05	0.85	4.09	5.44	5.74	2.6	3.91	3.29	3.69	4.66	3.85	3.45	4.11	5.22	2.17	2.5	3.32
Potri.002G101200	0.58	0.44	0.48	3.48	3.37	3.01	0.79	1.29	1.04	1.43	0.75	1.28	0.64	0.36	0.32	0.77	0.84	0.59
Potri.002G101300	2.5	2.33	2.3	16.11	8.36	9.6	4.16	2.75	5.57	5.22	4.77	3.81	3.07	1.88	2.52	2.8	4.14	3.08
Potri.002G101400	0.41	0.23	0.11	2.03	2.94	2.76	1.22	1.38	0.87	1.52	0.98	1.19	0.61	1.13	0.54	0.26	0.15	0.28
Potri.002G101500	0.69	0.63	1.09	1.68	2.17	2.27	1.35	1.45	1.51	0.76	0.98	0.41	1.49	1	1.05	2.01	1.78	1.31
Potri.002G101900	0.05	0.05	0.04	1.69	1.17	1.42	0.3	0.18	0.47	0.11	0.21	0.14	0.8	0.7	0.76	0.39	0.23	0.23
Potri.002G102100	5.11	5.58	5.12	2.79	3.17	2.65	3.76	4.18	3.64	2.24	2.93	2.07	4.01	4.81	4.58	5.37	5.79	5.6
Potri.002G102600	55.54	53.02	55.91	27.17	25.75	27.11	52.92	55.88	54.36	57.49	60.08	62.63	42.8	41.4	42.12	47.71	45.31	48.05
Potri.002G102900	11.52	8.01	9.22	4.87	4.35	5.58	8.31	8	8.71	5.94	7.19	7.9	9.08	8.02	9.81	5.69	7.37	6.09
Potri.002G103100	7.5	7.73	8.28	2.49	2.67	2.28	6	5.86	6.76	6.47	7.45	6.64	4.55	5	4.68	7.14	7.12	6.46
Potri.002G103900	20.58	23.12	23.43	9.35	8.67	8.59	22.25	19.08	19.41	15.05	15.84	16.85	21.13	18.65	18.82	19.23	19.25	20.25
Potri.002G104600	144.36	148.93	151.59	471.27	472.5	467.35	156.79	156.04	164.64	123.93	122.48	118.81	385.97	362.16	358.62	185.25	186.87	189.06
Potri.002G105600	3.06	1.84	2.91	7.36	7.4	8.08	1.92	1.91	2.4	2.13	2.28	2.42	1.86	2.79	3.2	4.11	3.07	2.4
Potri.002G105900	22.98	23.22	22.62	9.51	9.31	9.04	18.73	19	18.15	17.55	17.79	18.28	19.03	19.74	18.66	25.33	24.16	24.55
Potri.002G106000	1.52	1.53	1.66	6.77	7.03	7.27	3.73	4.14	3.93	3.34	4.54	4.71	2.59	3.15	3.28	2.2	1.87	1.96
Potri.002G106100	1.05	0.94	1.15	5.77	5.46	5.26	2.56	2.71	3.52	3.83	2.72	3.19	1.84	1.63	1.92	1.3	1.72	1.72
Potri.002G106400	1.03	0.62	0.66	0.26	0.38	0.23	0.13	0.23	0.3	0.21	0.06	0.39	0.36	0.71	0.54	0.77	0.62	0.65
Potri.002G106600	19.32	21.33	19.84	6.89	7.06	6.96	13.31	10.22	11.59	14.06	14.22	14.76	11.88	11.67	12.64	17.06	16.86	16.45
Potri.002G107200	5.1	4.75	4.64	5.28	5.26	4.91	11.73	12.05	12.23	8.03	8.6	7.6	7.02	7.31	7.9	8.55	7.59	9.42
Potri.002G108000	108.34	111.72	114.74	249.29	250.86	247.06	165.42	168.78	164.83	156.47	154.18	151.43	148.9	140.63	145.88	138.6	135.22	141.77
Potri.002G108100	3.15	3.83	3.4	13.12	11.2	11.58	5.43	8.33	8.31	4.9	4.59	6.79	5.21	3.34	3.8	4.02	5.09	3.62
Potri.002G108400	11.36	10.23	8.54	22.35	18.71	21.41	16.63	16.91	20.4	13.27	14.37	13.23	29.03	30.61	28.07	18.38	15.65	16.42
Potri.002G109300	0.13	0.1	0	0.48	0.8	0.46	0.44	0.58	0.47	0.69	0.63	0.57	0.43	0.19	0.46	0.1	0.15	0.06
Potri.002G110100	1.53	1.36	1.53	1.96	1.75	1.97	4.06	3.83	4.31	1.73	1.44	1.64	3.97	5.3	3.75	2.35	1.92	2.05
Potri.002G110600	1.58	1.83	1.81	4.36	5.3	4.94	2.8	3	2.94	2.55	2.36	2.32	2.29	2.84	2.06	1.85	1.63	1.82
Potri.002G111200	1.01	0.98	1.05	1.32	1.56	1.33	0.92	0.54	1.03	0.51	0.34	0.54	1.62	1.23	1.44	1.28	1.07	0.92
Potri.002G111800	0.85	0.9	0.59	2.16	1.68	1.98	2.57	1.88	2.12	1.58	1.69	2.29	1.42	1.28	1.35	0.36	0.94	1.39
Potri.002G111900	53.8	54.98	52.72	319.94	324.29	298.49	265.72	246.48	252.27	327.56	324.83	293.59	184.47	140.56	158.65	102.58	106.27	101.83
Potri.002G112500	70.51	70.55	70.37	36.05	33.85	33.13	68.54	73.46	74.32	91.77	82.9	83.29	61.08	54.18	58.66	61.02	62.59	66.08
Potri.002G112700	4.11	4.2	6.39	12.62	11.35	13.39	5.18	6.24	6.62	4.87	4.69	5	7.72	8.11	7.24	7.21	6.51	5.74
Potri.002G113000	3.67	3.72	4.91	1.85	1	1.3	5.86	5.82	5.4	4.94	3.53	4.36	4.73	5.24	3.6	5.37	4.7	5.24
Potri.002G113300	68.55	69.84	68.48	195.97	187.08	188.71	89.24	90.18	90.95	81.75	82.83	78.76	86.27	85	84.52	72.73	68.39	70.26
Potri.002G113400	8.16	8.08	5.99	16.95	16.09	16.69	6.52	4.56	5.61	6.37	6.12	4.43	7.43	5.69	7.79	6.35	6.65	7.08
Potri.002G113600	5.09	4.3	4.3	2.01	2.23	2.53	5.72	4.73	5.18	7.95	6.65	7.03	3.11	2.19	2.94	3.34	4.04	3.46
Potri.002G114300	5.42	5.86	4.24	4.53	5.41	5.14	1.88	1.96	2.04	2.18	2.84	2.57	4.29	4.78	4.47	4.11	4.42	4.08
Potri.002G114700	6.77	7.74	7.83	18.54	19.43	18.44	8.85	8.68	7.7	6.8	6.18	7.24	8.79	9.29	8.33	6.88	6.47	7.07
Potri.002G114800	4.48	5.01	5.59	12.76	13.67	14.36	9.33	10.2	9.82	9.58	8.56	9.27	9.28	8.86	9.85	4.98	5.68	5
Potri.002G115000	7.44	7.36	7.21	2.88	2.65	3.01	4.73	5.36	4.14	5.79	6.09	5.85	6.58	5.88	5.69	6.2	6.28	5.95
Potri.002G117200	19.05	19.58	21.96	5.61	5.81	5.56	20.02	19.81	19.63	16.21	16.42	16.48	19.85	18.95	19.34	24.24	24.79	23.29
Potri.002G117700	1.37	1.85	1.85	0.66	0.42	0.74	1.44	1.77	2.93	1.38	1.44	1.37	1.42	1.13	1.95	2.75	1.85	2.16
Potri.002G117800	83.48	75.49	74.11	13.56	11.62	12.51	58.98	57.43	60.3	48.95	40.21	48.43	49.64	42.83	45.23	67.39	69.85	72.91
Potri.002G118000	21.81	20.89	19.11	48.44	51.1	50.16	34.83	41.09	36.82	37.43	34.1	33.97	27.2	23.76	28.55	19.42	18.67	21.26
Potri.002G118700	0.5	1.17	0.56	1.51	1.97	1.65	1.05	1.22	1.35	1.73	1.38	1.87	1.29	1.4	1.35	0.87	1.26	1.09
Potri.002G118800	9.97	10.68	11.5	4.62	3.57	4.3	8.56	9.62	9.23	6.61	7.13	8.52	9.03	8.87	9.4	14.38	12.95	13.41
Potri.002G118900	69.04	66.31	67.63	31.26	32.01	32.25	45.08	47.23	44.55	41.8	42.37	44.2	42.23	45.79	45.7	74	74.03	75.07
Potri.002G119000	1.84	2.71	1.48	0.99	0.55	0.99	1.74	2.48	2.35	2.15	1.82	1.4	1.21	1.43	1.78	1.47	2.1	1.66
Potri.002G119300	36.76	34.74	32.15	8.6	10.01	9.28	28.86	30.63	30.94	22.05	20.69	20.61	47.85	42.5	46.36	72.83	73.04	71.74
Potri.002G119700	0.47	0.9	0.72	0.62	0.61	1.16	0.06	0.12	0.11	0	0.08	0	0.16	0.15	0.06	0.34	0.16	0
Potri.002G120100	382.2	367.6	384.68	163.53	166.87	172.52	499.22	523.51	489.79	459.65	410.32	412.11	366.06	349.85	371.2	357.39	346.27	365.44
Potri.002G120400	30.89	31.09	32.78	86.68	83.6	84.91	37.46	36.79	40.13	30.68	29.66	31.3	35.23	33.23	35.91	30.58	31.21	31.82
Potri.002G120700	65.66	65.79	62.28	272.27	268.24	259.85	75.04	77.24	74.05	45.56	46.2	50.77	133.81	135.66	124.57	54.15	52.72	56.68
Potri.002G120900	1.72	1.87	2.29	0.87	0.79	0.92	1.01	1.13	0.79	0.85	0.94	0.89	1.47	1.26	1.3	2.24	2.47	2.18
Potri.002G121200	1.94	1.63	1.32	0.31	0.42	0.59	1.63	1.57	1.31	0.72	0.71	0.12	1.94	1.64	2.57	3.46	2.8	2.99
Potri.002G121400	0.82	0.67	0.6	0.25	0.22	0.22	0.88	0.65	0.68	0.3	0.4	0.19	1.05	1.05	0.99	1.96	1.74	1.58
Potri.002G121500	0.55	0.55	1.21	4.15	3.34	3.33	2.67	2.47	1.97	1.7	1.38	1.73	1.13	1.02	0.86	0.67	0.51	0.52
Potri.002G122000	5.67	4.81	7.2	12.41	14.59	13.43	11.22	9.73	11.57	8.16	9.45	8.57	10.79	7.23	8.91	6.47	6.56	7.48
Potri.002G122700	21.45	24.12	22.37	11.13	10.45	11.55	14.49	14.55	13.82	18.71	18.96	18.18	13.49	14.99	14.79	16.34	15.49	14.66
Potri.002G122800	3.86	4.83	5.95	2.29	2.09	2.27	4.03	4.21	4.48	6.25	3.71	5.93	2.11	1.81	2.94	4.1	3.72	5.33
Potri.002G124100	33.57	33.82	31.21	37.75	39.48	36.23	73.37	74.86	73.64	45.89	37.75	36.61	33.09	31.08	29.07	38.06	38.25	39.26
Potri.002G124700	61.12	55.29	57.71	21.11	17	21.6	43.09	46.49	44.75	52.16	50.12	44	48.39	45.8	48.4	48.43	54.42	50.75
Potri.002G124900	7.61	8.1	8.65	3.99	4.05	3.06	6.45	5.93	5.14	6.95	7.53	6.59	5.83	7.78	4.76	5.68	7.09	6.31
Potri.002G125000	2.06	1.52	2.03	1.11	0.59	0.98	1.82	2.08	1.32	1.13	0.98	1.43	1.29	1.46	0.87	1.77	1.79	2.03
Potri.002G125800	5.79	5.65	5.56	14.72	15.2	14.18	4.44	4.57	4.44	3.81	4.52	4.74	7.2	5.72	6.58	6.25	5.9	6.26
Potri.002G125900	0.33	0.42	0.27	0.97	1.07	1.1	3.71	3.77	4.28	5.85	5.57	6.23	0.62	0.79	0.87	0.46	0.65	0.33
Potri.002G126100	24.25	22.94	25.01	1.79	1.55	1.63	11.4	10.04	11.61	11.18	11.61	9.45	3.54	3.4	3.68	5.46	5.52	6.3
Potri.002G126300	9.35	8.63	10.33	12.05	11.92	10.89	14.13	13.29	13.99	9.5	11.1	10.98	32.46	30.6	34.44	16.81	15.38	16.13
Potri.002G126500	0.58	0.9	0.69	3.14	3.53	2.91	1.12	1.68	1.21	1.11	1.17	0.99	0.87	0.87	1.54	0.49	0.57	0.68
Potri.002G126800	40.63	39.13	41.65	7.39	7.18	6.4	32.04	30.15	32.02	32.34	33.8	35.16	25.18	26.14	30.51	34.5	33.2	32.31
Potri.002G127000	4.24	3.35	3.93	1.25	0.75	1.42	2.15	2.34	2.39	4.47	3.79	4.42	1.59	2.3	1.52	1.98	2.79	2.24
Potri.002G127100	1.13	1.7	2.02	0.46	1.15	0.57	0.39	0.48	0.43	0.58	0.4	0.44	0.63	0.58	0.58	0.48	0.84	0.52
Potri.002G127800	2.42	3.84	2.2	10.97	9.47	9.24	4.84	4.31	5.16	6.81	6.56	4.19	4.92	2.43	4.11	3.94	4.79	4.1
Potri.002G128800	14.99	14.3	16.18	8.69	7.88	6.51	14.78	15.2	13.9	13.49	14.32	13.15	10.75	10.92	12.16	14.84	15.17	16.25
Potri.002G128900	0.59	0.59	0.64	0.08	0.3	0.38	1.61	2.12	1.23	0.52	0.64	0.95	0.86	0.85	0.98	1.94	2.09	2.74
Potri.002G129700	91.17	94.25	85.97	20.09	20.56	20.66	52.03	54.05	57.05	64.39	65.64	66.58	75.34	73.49	72.23	90.32	89.49	83.13
Potri.002G129800	4.66	3.44	4.07	11.13	9.46	10.88	4.81	4.13	5.62	3.38	4.29	3.44	5.11	4.89	5.09	4.7	5.6	4.48
Potri.002G130000	0.94	1.75	0.85	0.95	0.18	0.64	3.09	2.52	4.08	2.03	3.02	2.74	1.71	2.31	1.74	1.68	1.17	1.08
Potri.002G130200	0.43	0.65	0.62	0.27	0.23	0.23	0.39	0.32	0.46	0.29	0.28	0.09	0.23	0.03	0.14	0.15	0.23	0.03
Potri.002G130300	6.59	6.45	6.98	2.92	2.92	3.49	3.48	5.02	4.39	5.02	4.81	5.42	4.62	5.34	4.98	5.61	6.2	5.36
Potri.002G130400	2.12	1.94	2.28	5.13	4.74	5.49	1.38	1.37	1.42	1.53	1.45	1.06	2.71	3.49	2.61	2.57	2.71	3.58
Potri.002G130600	2.2	1.89	1.7	5.46	6.04	5.62	1.49	2.14	2.07	1.6	2.23	1.09	2.57	3.19	3.25	2.82	1.93	2.04
Potri.002G130900	1.85	1.44	2.04	0.44	0.79	0.66	1.25	0.78	1.68	1.74	1.26	2	1.52	1.96	1.33	1.99	1.18	2.29
Potri.002G131000	3.04	3.09	3.73	1.3	1.73	2.01	2.42	2.25	3.43	1.77	3.04	3.14	3.54	3.15	3.35	3.17	2.87	3.23
Potri.002G132900	6.13	5.63	5.24	12.54	12.2	13.07	12.42	10.46	11.65	13.7	13.6	11.46	7.9	8.04	7.87	6.71	6.41	6.89
Potri.002G133100	2.06	3.04	2.24	7.69	6.16	7.16	7.04	5.84	5.17	5.31	5.09	4.62	3.59	3.22	2.24	2.82	2.6	2.95
Potri.002G133500	10.26	8.06	9.8	23.38	23.71	23.19	11.24	13	11.83	9.61	10.94	9.08	9.69	10.85	11.4	6.79	8.78	7.81
Potri.002G134200	4.58	3.87	4.28	9.9	9.19	10.57	4.94	4.11	4.69	5.51	4.88	5.24	6.54	5.49	5.53	4.81	5.44	5.34
Potri.002G134300	32.14	31.25	32.79	6.08	7.08	6.65	8.36	7.25	6.97	14.31	16.15	15.66	10.96	11.18	11.96	17.08	17.77	15.3
Potri.002G134600	11.94	9.86	11.39	31.12	29.48	29.53	10.07	11.45	11.02	9.02	9.73	10.18	16.8	16.16	15.89	14.06	14.07	16.29
Potri.002G136100	3	2.83	2.98	0.88	0.82	0.85	2.17	1.49	1.93	3	3.24	3.18	1.69	1.57	1.36	1.17	2.01	2.22
Potri.002G136400	1.89	1.42	1.37	0.71	0.79	0.62	0.73	0.53	0.61	0.53	0.6	0.56	0.79	0.69	0.89	1.15	1.3	0.82
Potri.002G137100	27.92	28.57	30.04	14.27	14.98	15.51	25.16	26.47	24.96	33.45	33.15	34.33	22.28	23.22	23.26	24.97	25.29	24.44
Potri.002G138300	62.26	58.76	59.2	132.14	132.44	128.51	59.78	64.87	61.14	68.44	57.56	65.06	80.25	75.64	75.02	63.85	65.31	67.29
Potri.002G138700	3.22	2.94	3.28	7.71	7.96	5.55	3.27	3.83	3.4	3.46	3.41	4.15	3.61	3.27	4.77	3.65	2.72	4.17
Potri.002G138900	0.78	0.54	0.64	2.39	2.22	2.88	0.93	0.68	1.16	0.84	1.18	0.83	0.99	0.77	0.97	0.92	0.56	0.73
Potri.002G141000	6.35	6.33	6.15	13.93	13.86	13.73	5.74	7.23	6.54	5.07	4.69	4.86	7.69	6.43	5.41	6.27	6.54	7.98
Potri.002G141200	0.3	0.27	0.12	2.24	2.65	1.62	0.72	0.47	1.09	0.3	0.92	0.38	1.06	0.79	1.12	0.12	0.24	0.23
Potri.002G141700	0.31	0.62	0.66	1.63	1.87	1.59	1.45	0.8	0.79	1.35	0.7	1.26	0.22	0.16	0.3	0.95	0.42	1.1
Potri.002G142800	63.11	64.54	62.26	9.96	9.96	9.16	53.76	53.17	49.23	39.67	34.15	38.4	17.22	17.67	18.29	28.86	29.71	34.6
Potri.002G143400	8.21	6.4	6.77	19.48	19.74	18.01	8.58	9.48	8.98	7.52	7.06	7.76	8.16	7.82	8.26	11	13.23	9.96
Potri.002G143600	0.2	0.33	0.28	1.53	1.48	1.58	2.67	1.12	2.06	2.24	1.52	1.8	2.29	1.33	1	0.82	1.16	1.19
Potri.002G143900	0.07	0.07	0.12	0.8	1.14	0.78	0.1	0.21	0.32	0.19	0	0.19	0.79	1.92	1.22	0.73	0.85	0.81
Potri.002G144900	6.35	7.58	6.36	8.41	8.35	7.97	10.33	12.69	10.75	14.95	14.92	14.64	16.69	12.8	14.29	7.19	7.33	8.24
Potri.002G145700	1.28	0.99	1.61	1.3	1.32	0.95	0.65	1.02	0.65	0.58	0.5	0.47	0.5	1.04	0.91	0.86	1.04	0.72
Potri.002G145800	0.68	0.96	0.47	0.03	0.11	0.34	0.32	0.33	0.16	0.56	0.37	0.77	0.71	0.44	0.53	0.51	0.15	0.28
Potri.002G146100	9.97	10.42	9.07	4.38	4.16	4.06	9.38	10.05	11.06	11.21	9.12	10.24	8.63	10.59	9.39	10.15	10.2	10.44
Potri.002G146400	67.55	66.61	68.11	169.35	167.27	165.7	61.89	62.44	63.7	53.16	48.91	51.13	104.11	103.34	102.75	73.85	74.8	76.33
Potri.002G146500	3.08	2.86	2.3	8.98	10.61	9.63	3.47	3.9	4.66	3.03	3.22	3.1	4.15	4.12	4.6	3.57	2.88	3.16
Potri.002G147000	2.24	2.53	1.64	4.37	5.95	4.89	3.2	3.84	2.88	2.32	2.57	3.02	3.17	3.7	3.41	3.52	4.1	3.87
Potri.002G147100	5.45	5.92	6.71	1.24	1.34	0.65	5.65	6.78	6.8	6.34	6.97	5.75	5.4	4.79	4.8	6.09	6.04	5.61
Potri.002G147700	0.26	0.25	0.25	0.83	0.63	1.12	1.28	1.79	1.25	1.17	0.92	1.69	0.75	1.13	0.39	0.63	0.35	0.55
Potri.002G148000	4.17	3.41	3.73	3.41	3.74	3.79	1.98	1.17	1.71	1.61	1.54	1.66	2.57	2.98	1.67	4.37	5.34	5.41
Potri.002G149700	26.34	21.76	21.73	9.6	10.21	8.25	20.95	18.52	21.38	22.18	18.59	17.76	24.03	19.95	20.12	21.3	20.92	22.98
Potri.002G149800	16.92	19.11	18.52	10.1	9.5	9.16	21.16	20.26	21.19	23.88	22.69	22.45	16.5	17.27	18.38	20.45	18.66	19.09
Potri.002G150100	0	0.09	0.01	0.63	0.57	0.83	0.13	0.21	0.27	0.02	0.23	0.12	0.19	0.05	0.11	0	0.11	0.04
Potri.002G150200	0.02	0.27	0.36	0.88	1.01	0.94	0.29	0.42	0.36	0.21	0.31	0.06	0.37	0.13	0.13	0.24	0.12	0.29
Potri.002G150400	0.11	0.15	0.11	1.93	1.84	1.47	0.5	0.82	0.67	0.26	0.35	0.21	0.27	0.67	0.49	0.1	0.2	0.34
Potri.002G150500	0.35	0.32	0.15	2.23	1.8	1.62	0.75	0.64	0.56	0.15	0.24	0.19	0.35	0.28	0.36	0.24	0.17	0.04
Potri.002G150600	0.73	0.5	0.74	0.49	0.43	0.63	1.08	1.17	0.84	0.87	1.43	0.58	1.5	0.88	1.04	2.3	1.52	2.56
Potri.002G151300	0	0	0.06	1.03	0.8	0.7	0.5	0.32	0.49	0.46	1.3	1.12	0.14	0.24	0.11	0.07	0	0
Potri.002G152600	0.7	0.64	0.69	0.58	0.79	0.39	0	0.1	0	0	0.33	0	0.35	0.42	0.26	0.84	0.4	0.29
Potri.002G154200	0	0.38	0.05	0.37	0.6	0.57	0.36	0.17	0.77	0.27	0.08	0.15	0.27	0.37	0.1	1.15	1.53	1.2
Potri.002G155100	0.78	0.48	0.77	0.44	0.22	0.32	0.54	0.31	0.45	0.39	0.74	0.6	0.75	0.68	0.57	0.51	0.4	0.32
Potri.002G155300	6.12	6.71	6.45	1.07	0.88	0.89	3.23	3.11	3.59	2.34	3.47	3.31	4.61	5.48	4.52	10.87	9.53	10.11
Potri.002G156300	33.78	34.65	33.39	14.63	18.19	15.55	45.26	43.86	45.93	47.93	38.11	39.56	33.58	28.77	31.91	45.83	44.46	39.68
Potri.002G156600	8.81	8.53	8.73	3.75	3.81	3.32	9.09	10.7	9.02	9.95	9.9	9.66	7.3	5.94	7.51	9.62	9.99	9.36
Potri.002G157600	2.49	2.24	1.99	1.42	0.71	0.76	1.19	2.16	1.53	1.86	1.43	1.03	1.71	2.35	1.71	1.18	1.18	0.99
Potri.002G158000	1.57	1.87	2.09	0.5	0.59	0.71	1.3	0.96	1.11	1.3	0.96	1.25	1.24	1.47	1.36	1.72	2.45	2.45
Potri.002G159600	1.16	1.4	1.46	0.07	0.25	0.21	0.89	0.92	0.31	0.25	1.07	0.65	0.82	1.02	1.81	1.02	1.43	0.79
Potri.002G159900	24.16	22.62	25.72	12.96	12.89	12.79	21.23	20.97	20.83	21.9	25.78	26.23	19.89	22.43	20.67	20.78	19.24	21.09
Potri.002G160200	19.23	16.35	16.31	6.83	7.08	7.42	15.42	15.9	14.73	15.42	15.09	15.89	15.13	15.5	16.49	18.07	18.15	19.39
Potri.002G160300	1.89	2.7	2	4.91	4.53	4.99	1.41	2.3	2.15	1.83	2.27	1.54	2.48	2.2	1.52	2.66	2.9	2.82
Potri.002G160800	56.46	55.86	61.77	33.06	29.03	30.9	49.26	50.48	49.29	56.98	55.18	55.24	48.56	48.28	47.83	69.75	66.66	68.95
Potri.002G161900	17.6	16.87	19.74	7.32	6.46	8.3	33.33	36.31	36.59	28.66	25.34	28.23	21.43	17.83	20.33	22.94	26.18	25.36
Potri.002G162100	1.97	1.32	2.16	0.93	0.46	0.67	1.37	2.2	2.15	1.82	2.58	1.59	1	1.63	1.66	1.49	1.56	1.94
Potri.002G162300	0.82	1.05	1.18	6.43	6.9	5.87	2.99	3.41	2.42	2.55	2.92	2.44	2.06	1.7	1.92	1.65	1.59	1.22
Potri.002G162400	16.37	16.19	16.67	273.44	275.28	279.27	22.8	23.81	23.31	14.75	12.83	11.62	70.24	62.97	66.61	23.58	23.05	23.88
Potri.002G163400	14.05	15.36	15.05	27.89	23.99	27.57	10.54	11	9.87	6.29	5.72	5.99	14.57	14.16	15.34	13.86	11.67	13.52
Potri.002G164300	9.31	10.64	11.78	1.23	1.7	2.11	11.61	10.05	7.38	9.08	11.85	10.26	9.81	7.16	6.26	8.88	11.17	9.5
Potri.002G164900	0.34	0.61	0	2.75	1.22	1.68	1.4	0.74	0.93	1.67	0.77	0.85	0.98	0.58	1.05	0.17	0.36	0.21
Potri.002G165000	26.57	30.38	27.4	18.27	18.4	19.77	71.84	68.69	68.61	86.48	77.79	76.21	21.41	20.22	22.02	25.01	25.02	23.37
Potri.002G165300	0.49	0.31	0.53	0.93	1.26	0.92	0.65	0.66	1.21	0.94	0.67	0.99	0.8	0.46	0.74	0.49	0.57	0.48
Potri.002G165400	29.87	24.17	29.74	62.01	70.4	63.37	44.83	48.66	47.36	43.89	44.08	41.84	38.05	39.25	37.38	34.05	33.63	30.67
Potri.002G165800	1.09	1.07	0.47	16.92	14.87	13.28	2.31	2.5	2.38	1.95	1.82	0.87	2.96	2.19	2.06	1.27	2	1.42
Potri.002G166300	53.55	54.84	57.13	2.25	2.11	2.15	94.49	88.72	95.34	46.71	49.2	49.68	43.95	44.83	44.03	62.6	64.58	59.65
Potri.002G166400	3.61	4.03	3.15	0.69	1.09	0.65	5.02	3.5	5.04	3.13	3.91	3.94	3.89	2.53	3.29	4.15	3.38	3.73
Potri.002G167400	1.95	1.76	2.63	0.78	1.03	0.87	3.21	2.62	2.49	2.6	3.59	1.89	4.84	5	5.1	2.05	2.73	1.63
Potri.002G167700	8.34	9.6	8.56	3.13	2.64	2.9	8.36	8.73	8.03	7.79	8.75	8.46	7.08	6.83	6.81	8.91	8.38	8.02
Potri.002G167800	1.07	0.85	0.68	2.83	3.19	3.39	1.36	1.21	1.03	1.47	0.92	0.92	0.97	1.23	1.13	1.11	0.94	0.61
Potri.002G168300	0.24	0	0.22	2.15	2.12	1.95	0.88	0.78	1.34	1.01	0.64	1.16	1.05	0.32	0.44	0.52	0.34	0.46
Potri.002G168600	2.9	3.26	2.36	2.72	2.05	2.22	1.43	0.85	1.62	1.79	1.32	1.75	1.61	1.65	1	3.11	2.7	2.1
Potri.002G168900	0.54	1	1.44	2.36	3.57	2.53	1.93	2.32	1.72	1.86	2.04	0.88	1.28	1.15	1.21	1.17	1.35	0.66
Potri.002G170300	0.6	0.68	0.63	0.11	0.02	0.12	0.08	0.2	0	0.34	0.16	0.03	0.64	0.63	0.25	0.88	0.22	0.2
Potri.002G171000	7.58	7.05	7.86	3.19	3.58	2.81	4.13	2.79	3.78	5.36	5.55	4.93	5.92	5.53	5.38	5.28	4.89	4.94
Potri.002G171300	22.09	19.44	19.36	5.65	5.06	6.33	13.07	14.45	13.12	12.13	12.53	11.82	20.32	18.28	19.8	22.64	24.02	23.32
Potri.002G173400	1.69	2.06	1.65	6.12	5.57	5.62	2.48	2.54	2.62	2.17	1.48	2.1	2.89	2.55	2.56	2.36	2.32	2.65
Potri.002G173900	1.2	1.05	0.84	0.21	0.24	0.48	3.22	3.01	2.39	1.65	1.69	1.47	1.61	1.49	1.75	1.3	1.26	1.5
Potri.002G174600	0.25	0.21	0.16	0.3	0.42	0.19	0.68	0.21	0.5	0.27	0.45	0.27	0.66	0.58	0.63	0.38	0.5	0.14
Potri.002G175000	43.31	45.07	42.43	22.83	21.15	24.04	34.4	36.65	34.27	40.97	36.16	38.33	41.58	40.28	39.54	38.53	40.09	40.64
Potri.002G175400	14.03	12.64	12.75	54.98	57.58	57.63	20.58	20.52	19.92	9.82	9.99	10.6	14.68	16.23	17.8	18.45	18.33	18.92
Potri.002G176300	74.69	76.27	71.18	15.22	15.82	16.96	26.3	26	26.42	32.65	30.86	33.43	32.28	30.56	29.06	51.57	51.48	51.64
Potri.002G178000	4.2	2.96	3.15	11.6	11.59	10.01	5.01	3.85	4.9	3.85	4.64	3.98	5.95	6.63	7.88	3.5	3.32	3.92
Potri.002G178100	5.49	6.09	6.26	6.33	6.09	4.87	2.62	2.38	2.62	4.38	4.78	2.93	4.41	4.23	5.78	5.88	4.6	5.01
Potri.002G178900	0.92	0.11	0.66	3.26	2.66	3.48	1.72	2.44	2.43	1.06	1.73	1.21	0.82	1.32	1.18	0.84	0.74	1.07
Potri.002G179000	1.24	1.79	1.15	3.86	2.31	4.64	1.79	2.73	1.91	2.88	1.97	2.72	1.16	0.89	1.41	2.08	3.04	2.28
Potri.002G180500	0.26	0.35	0.09	0.51	0.69	0.91	0.24	0.12	0.32	0.03	0.15	0.03	0.39	0.48	0.4	0.16	0.33	0.29
Potri.002G180600	5.78	3.64	4.1	14.65	12.74	12.85	3.89	3.35	4.39	2.04	2.33	1.73	5.86	6.56	4.55	5.33	6.32	6.51
Potri.002G180800	55.45	59.76	57.62	79.89	80.92	80.01	2.87	3	3.07	2.38	3.02	2.39	17.76	18.49	19.57	36.78	38.92	39.71
Potri.002G181000	5.02	4.87	5.13	2.31	2.56	2.15	3.06	2.46	2.74	3.72	3.2	4.22	3.77	3.39	3.76	4.49	4.5	3.99
Potri.002G181300	16.68	15.03	17.38	45.21	44.2	44.67	19.47	21.05	17.38	15.39	16.79	13.87	27.46	26.04	28.5	24.01	21.1	21.29
Potri.002G181600	2.62	2.09	2.99	0.81	0.78	0.63	2.01	1.75	1.75	1.85	1.61	1.85	1.36	1.34	1.22	1.11	1.43	1.51
Potri.002G182500	46.31	47.64	46.12	14.98	14.98	13.69	40.83	38.74	39.34	56.47	57.31	59.12	32.88	36.11	35.44	41.62	41.25	42.25
Potri.002G183100	1.13	1.46	1.39	0.51	0.4	0.46	0.8	0.56	0.7	0.76	0.81	0.99	1.1	1.35	1.37	0.99	1.17	1.04
Potri.002G183900	7.43	7.99	8.2	7.19	8.27	8.47	3.33	2.97	3.01	4.99	5.68	4.52	5.99	6.93	6.76	6.83	5.37	6.58
Potri.002G184400	23.54	25.57	24.52	11.56	11.73	11.5	19.34	19.51	18.49	19.79	22.26	21.17	21.97	24	22.15	24.67	23.36	23.94
Potri.002G184900	5.34	7.28	8.38	20.64	22.69	21.81	21.88	23.61	23.67	19.08	17.86	19.11	13.91	13.23	12.73	9.56	11.41	9.73
Potri.002G185100	7.73	7.7	6.23	5.92	6.51	6.69	2.6	1.19	3.58	2.83	4.04	2	6.3	6.28	6.02	5.08	5.83	7.01
Potri.002G185300	0.8	0.8	0.73	3.49	4.22	3.92	3.12	3.27	3.01	3.19	3.34	2.79	3.66	1.63	3.26	1.8	1.2	1.38
Potri.002G185700	2.19	1.96	2.15	0.6	0.57	0.64	0.23	0.3	0.38	0.6	1.18	0.3	1.01	0.99	1.93	1.29	1.19	0.96
Potri.002G185800	4.16	4.65	5.76	2.28	2.19	2.14	3.37	2.82	2.87	3.5	2.89	2.94	5.51	3.72	3.77	3.94	4.74	4.31
Potri.002G186400	1.22	1.83	0.43	6.29	4.94	5.84	4.31	4.37	4.23	1.39	2.46	2.18	2.45	2.83	3.36	4.39	3.6	3.51
Potri.002G187000	1.75	2.19	2.17	3.94	6.24	4.78	2.52	2.05	2.38	1.84	2.19	1.84	1.6	1.13	1.61	2.14	2.3	2.99
Potri.002G188000	33.2	36.51	34.85	34.27	34.47	37.13	117.42	117.43	112.01	104.83	102.79	102.7	56.46	57.53	58.33	52.06	49.84	58.53
Potri.002G188100	6.98	7.37	5.92	1.82	1.71	1.42	2.12	1.92	1.77	3.01	4.28	5.34	2.58	1.64	2.43	4.11	4.43	3.61
Potri.002G188200	15.54	16.14	15.95	4.99	4.44	5.03	9.66	11.04	10.27	13.82	15.72	15.84	10.31	10.58	9.94	9.55	11.03	12.09
Potri.002G188300	27.65	26.67	24.46	10.87	12.23	10.38	16.92	16.87	15.53	19.59	20.13	19.33	19.82	16.78	15.72	20.17	19.63	21.83
Potri.002G188400	36.84	35.48	37.73	18.08	17.87	18.33	24.12	24.83	26.31	28.95	27.97	32.68	24.03	27.85	26.95	28.71	29.51	29.28
Potri.002G189000	40.52	37.57	36.22	138.88	144.56	143.18	73.1	75.12	79.36	61	58.61	53.55	51.59	43	48.94	43.08	43.73	42.01
Potri.002G189200	1.88	2.12	2.16	8.01	8.99	8.73	4.69	4.45	4.56	3.64	4.08	3.92	4.18	3.1	3.22	2.56	2.71	2.46
Potri.002G189300	13.06	10.02	11.98	34.36	32.51	31.31	9.7	7.33	10.37	11.34	11.68	10.03	8.07	7.35	7.42	7.15	5.92	7.72
Potri.002G190500	13.12	14.69	11.98	30.14	30.74	29.14	13.66	14.35	14.7	12.63	12.5	14.86	17	17.52	18.8	15.31	14.58	14.61
Potri.002G190700	0.08	0.15	0.07	0.27	0.43	0.91	0.94	0.55	0.64	0.25	0.27	0.31	0.42	0.17	0.51	0.41	0.38	0.32
Potri.002G190800	0.88	1.43	0.69	1.34	1.42	1.05	2.38	2.26	2.39	0.59	0.44	0.71	1.71	0.71	1.23	3.79	3.08	3.6
Potri.002G191100	0.36	0.62	0.88	5.36	4.48	3.65	0.88	0.64	0.41	0.41	0.63	0.05	2.11	1.78	1.84	0.88	1.55	0.76
Potri.002G191600	91.24	94.91	94.77	5.19	4.4	5.72	70.69	73.1	75.9	42.38	43.7	41.57	70.44	70.63	67.69	113.55	122.34	116.09
Potri.002G191700	8.07	7.25	5.91	2.94	2.39	3.97	6.96	5.28	6.55	4.7	6.36	6.73	6.22	7.54	7.5	5.71	5.33	5.56
Potri.002G191800	0.73	0.57	0.77	0	0	0.11	0.1	0	0.18	0.29	0.03	0.12	0.28	0.75	0.87	3.81	5.09	4.3
Potri.002G192400	4.52	5.56	5.28	11.29	11.13	10.74	4.82	4.3	4.97	4.03	4.34	3.88	5.37	6.78	6.06	3.66	4.18	4.32
Potri.002G192500	176.78	189.37	184.75	69.25	69.8	66.26	148.25	139.35	150.29	142.67	150.77	149.05	146.99	149.5	152.42	157.6	167.92	162.92
Potri.002G193400	3.71	4.66	4.08	2.24	1.98	1.6	3.46	2.82	1.57	3.27	3.6	3.35	4.53	3.69	3.27	4.76	4.91	5.39
Potri.002G193700	1.28	2.2	2.19	0.39	0.52	0.19	0.52	0.76	0.4	0.55	0.59	0.42	0.66	1.17	0.49	1.9	1.89	1.74
Potri.002G193800	9.33	10.75	9.68	3.74	3.25	3.69	3.03	3.66	3.56	5.86	4.45	4.39	3.79	3.78	3.15	5.38	7.26	7.82
Potri.002G194500	18.3	20.76	18.38	9.64	9.67	8.98	13.57	14.7	14.01	15.63	16.5	15.22	12.96	13.29	14.58	17.23	17.67	17.29
Potri.002G195300	49.58	50.38	47.22	20.91	21.74	22.55	37.45	36.57	38.32	43.29	46.85	46.51	26.74	28.63	31.4	30.54	33.02	31.39
Potri.002G195700	41.53	39.72	38.42	13.73	14.53	14.21	36.93	33.85	34.55	34.15	35.94	38.96	27.66	28.1	28.85	37.85	38.75	36.27
Potri.002G195900	4.2	3.72	5.01	12.97	12.73	12.43	9.13	11.3	8.65	9.36	7.07	6.95	7.39	6.38	5.44	4.44	5.96	5.96
Potri.002G196200	40.82	43.13	38.6	18.92	17.56	19.17	44.43	44.26	42.7	46.2	46.73	46.53	41.3	40.21	43.23	48.27	49.13	51.56
Potri.002G197200	2.58	2.81	2.7	17.37	18.07	17.29	8.88	9.4	9.85	5.62	5.37	6.29	4.8	5.14	5.12	4.47	4.61	4.88
Potri.002G197400	0.14	0.14	0.26	0.79	1	0.68	0.53	0.41	0.4	0.19	0.2	0.36	0.39	0.4	0.29	0.22	0.16	0.35
Potri.002G198600	78.98	75.26	77.82	40.87	39.41	38.06	56.55	58.74	60.82	70.09	68.93	67.5	92.45	91.07	92.43	85.36	85.31	77.28
Potri.002G198800	0.53	0.64	0.5	0.76	0.54	1.09	2.74	1.87	2.36	1.62	1.33	0.74	1.65	1.57	2.46	2.11	1.48	1.7
Potri.002G199200	2.69	3.46	3.36	11.7	8.89	9.7	3.59	4.13	4.59	2.23	3.67	3.96	3.94	3.79	4.6	4.27	3.08	6.08
Potri.002G199500	1.69	0.81	0.99	0.25	0.42	0	0.47	0.49	0.3	0.74	0.67	0.56	0.49	0.39	1.03	1.17	0.71	0.58
Potri.002G199900	12.65	15.31	13.78	5	5.53	6.08	13.1	12.83	11.9	14.09	15.31	13.52	8.92	9.46	8.93	10.33	13.14	12.16
Potri.002G200300	0.34	0.22	0.27	1.83	1.85	2.18	0.74	1.2	1.05	0.82	1.03	0.91	0.66	0.93	0.61	0.44	0.36	0.24
Potri.002G200400	2.59	2.47	1.99	0.78	0.9	0.89	1.43	1.06	1.39	2.12	2.01	1.94	1.4	0.84	1.37	1.85	2.07	1.82
Potri.002G201000	7.91	7.16	7.87	20.49	21.32	20.03	12.5	11.55	12.56	10.59	10.77	11.58	6.55	6.8	6.79	8.92	8.33	9.07
Potri.002G202300	196.17	196.16	201.83	54.59	56.08	53.1	232.76	225.94	240.83	233.27	241.27	246.39	134.31	144.99	137.16	215.12	211.47	212.74
Potri.002G203500	20.52	22.41	21.21	5.39	5.35	5.38	20.27	19.86	20.36	13.26	11.83	12.62	26.43	25.68	27.23	47.54	43.74	48.71
Potri.002G203600	24.05	22.42	19.34	11.3	12.11	11.05	21.63	21.35	20.62	21.06	19.99	19.28	21.93	22.42	21.85	22.87	22.39	22.36
Potri.002G205100	20.68	16.93	17.6	7.88	8.99	9.1	17.97	16.16	21.43	16.19	17.55	14.55	12.57	12.8	12.78	12.18	14.91	16.81
Potri.002G205300	3	2.45	3.18	1.14	1.01	1.73	1.86	1.41	2.27	2.57	1.62	2.42	0.69	1.49	1.41	3.72	2.3	1.97
Potri.002G205400	35.75	37.53	36.02	7.42	7.31	7.53	19.86	21.14	18.14	25.16	25.49	23.12	15.61	13.69	14.12	25.83	28.14	26.88
Potri.002G205800	6.7	7.82	7.48	3.28	3.33	4.22	5.94	5.62	4.64	6.99	5.06	5.66	7.54	6.27	6.91	7.29	8.71	7.83
Potri.002G206100	2.49	1.72	3.01	0.27	0.14	0.3	0.47	0.29	0.49	0.45	0.97	0.56	0.26	0.75	0.72	0.59	0.64	1.41
Potri.002G206300	17.39	19.76	19.82	9.92	7.92	7.66	14.55	14.86	14.6	16.68	15.91	17.01	17.8	18.38	17.32	16.38	17.55	17.75
Potri.002G207700	0.18	0.19	0.2	0.47	0.43	0.57	0.54	0.82	0.43	0.56	0.48	0.77	0.59	0.55	0.27	0.51	0.27	0.18
Potri.002G208400	16.96	16.39	18.1	48.17	50.21	47.04	30.07	41.23	34.43	35.31	34.56	39.18	24.7	25.07	22.53	13.48	11.23	14.62
Potri.002G208500	1.05	0.97	1.59	0.82	1.32	0.43	0.25	0.37	0.3	2.05	2.77	3.06	0.43	0.8	0.81	0.31	0.57	0.5
Potri.002G209000	2.9	3.45	2.27	0.43	1.1	0.67	1.61	2.27	1.3	3.63	4.79	3.82	1.34	1.36	2.09	1.28	1.38	2.15
Potri.002G209900	38.73	40.32	41.28	9.97	9.94	10.51	14.62	17.11	16.16	21.88	22.07	20.84	18.67	19.48	20.69	27.65	27.55	28.08
Potri.002G210000	0.45	0.53	0.42	2.76	2.98	3.07	1.09	1.24	0.96	0.99	0.98	1.27	0.93	1.27	1.44	0.52	0.76	1.11
Potri.002G210400	0.02	0.19	0.2	0.83	0.68	0.4	0.12	0.13	0.07	0.02	0	0.21	0.33	0.25	0.12	0.03	0.11	0.04
Potri.002G212400	35.2	36.5	37.3	6.3	6.66	6.51	37.95	39.56	42.29	38.08	39.63	36.69	33.02	32.37	34.64	33.9	36.94	38.4
Potri.002G213100	8.77	7.58	8.54	1.98	2.86	2.09	3.96	3.31	3.55	4.69	2.92	2.74	6	6.44	5.6	10.24	8.09	9.41
Potri.002G214100	4.51	4.3	4.91	1.6	1.71	1.55	2.04	1.96	2.35	2.93	2.83	3.03	3.63	3.88	4.2	3.22	3.52	3.34
Potri.002G214200	0.74	0.56	0.38	1.9	1.86	1.47	0.52	0.57	0.87	1.25	1.64	0.87	1.21	1.29	0.78	0.46	0.47	0.85
Potri.002G214800	85.8	101.21	87.69	133.46	129.27	128.23	40.57	38.26	38.61	42.91	40.22	48.04	85.23	78.73	83.04	88.96	86.37	77.59
Potri.002G214900	0.53	1.07	1.09	0.5	0.32	0.44	0.64	1.12	0.44	0.46	0.96	0.63	0.68	0.76	0.73	0.53	0.83	0.71
Potri.002G216000	0.12	0.33	0.41	1.38	1.43	1.43	0.61	0.45	0.89	0.26	0.33	0.47	0.27	0.81	0.32	0.21	0.3	0.37
Potri.002G216400	40.26	40.39	38.27	140.98	139.95	142.45	27.47	29.33	30.21	23.91	23.63	24.18	68.22	70.03	67.6	33.96	32.27	32.77
Potri.002G220400	51.42	52.18	51.61	78.53	85.02	77.91	23.81	22.32	21.7	21.75	23.33	18.94	43.33	45.36	45.31	46.49	44.98	43.21
Potri.002G222300	0.34	0.69	1.3	4.65	4.18	4.14	3.4	2.95	3.55	1.57	1.61	2.07	1.2	1.21	1.08	0.5	0.81	1.57
Potri.002G222700	0.3	0.46	0.63	1.63	1.75	1.54	0.81	0.78	0.89	0.57	0.33	0.77	1	0.8	0.81	1.46	1.09	1.71
Potri.002G223100	3.43	4.36	4.03	90.25	93.14	87.36	9.85	12.82	9.37	4.95	4.64	3.58	3.68	2.52	4.49	4.47	4.88	4.48
Potri.002G223200	0.58	1.85	1.71	0	0.06	0	0.17	0.06	0.04	0.15	0	0	0	0	0.09	0.03	0	0.19
Potri.002G223300	0.73	1.46	0.39	2.99	2.94	3.19	2.9	3.43	2.43	2.34	1.83	2.39	1.73	1.58	2.34	1.62	1.86	1.29
Potri.002G224200	0.47	0.43	0.22	5.33	5.78	4.63	1.56	1.04	0.97	0.29	0.11	0.72	1.63	1.88	1.17	0.82	0.57	1.05
Potri.002G224300	19.32	17.9	16.33	7.52	7.33	7.99	11.66	11.31	11.54	15.37	15.56	13.91	15.66	17.82	17.01	16.34	16.39	15.38
Potri.002G224400	0.21	0.38	0.31	0.87	0.9	0.98	0.68	0.49	0.26	0.26	0.33	0.29	0.9	0.74	0.51	0.75	0.61	0.68
Potri.002G224600	1.95	2.14	2.1	12.97	13.11	12.23	3.76	3.57	3.47	2.71	3.58	2.32	5.45	5.25	5.39	2.75	3.94	3.25
Potri.002G225500	1.72	2.41	1.92	5.59	5.21	6.32	1.55	1.88	2.01	1.75	1.39	1.31	2.02	2.31	1.96	2.08	1.74	1.97
Potri.002G225700	2.62	4.28	3.94	1.81	1.53	1.81	4.45	2.83	2.23	1.52	0.93	2.27	3.31	2.99	2.43	4.22	5.64	2.64
Potri.002G226000	11.12	10.75	10.12	4.83	6.36	5.92	10.42	9.72	7.96	9.82	8.55	8.31	10.83	10.07	11.31	12.11	11.35	9.97
Potri.002G226600	23.49	23.01	23.74	11.61	10.92	11.97	19.92	21.41	20.44	21.44	21.66	19.77	18.47	21.47	19.67	23.46	25.23	25.01
Potri.002G226700	0.13	0.06	0.11	0	0	0.37	0.2	0	0.16	0	0	0	0.21	0.23	0.14	0.9	0.85	0.54
Potri.002G226800	1.37	0.84	1.14	6.27	6.65	7.05	2.92	2.85	2.2	2.35	2.89	2.66	2.94	2.83	3.31	1.85	2.47	2.37
Potri.002G226900	24.05	21.16	19.81	10.43	10.09	10.07	31.52	32.12	31.32	36.03	35.15	35.16	20.08	18.43	21.09	18.27	20.44	21.22
Potri.002G227000	0.35	0.39	0.38	0.05	0.1	0	0.44	0.2	0.14	0.06	0.1	0	0	0.03	0	0.33	0.28	0.52
Potri.002G227100	8.29	10.17	10.63	24.02	19.57	20.63	12.89	11.76	10.8	9.58	10.03	9	12.96	12.46	13.78	11.99	13.53	12.6
Potri.002G227300	0.53	0.55	0.6	0.75	0.3	0.39	0.33	0.01	0.05	0.05	0.03	0	0.06	0.01	0.14	0.02	0.08	0.07
Potri.002G227400	0.05	0.13	0.29	0.86	1.15	0.68	0.17	0.05	0.04	0.05	0.05	0.1	0.39	0.13	0.41	0.06	0	0.09
Potri.002G227600	0.51	0.62	0.74	1.98	2.39	1.61	0.73	0.49	0.8	0.77	1.05	0.71	1.51	1.42	1.5	1.44	0.94	1.09
Potri.002G228200	2.09	2.1	1.66	4.95	4.84	5.28	3.95	2.78	4.01	2.83	3.59	3.03	3.51	2.42	2.68	2.5	3.83	2.2
Potri.002G230300	1.08	0.44	1.05	2.17	2.91	2.58	1.15	0.53	2.16	2.17	2.25	2.41	0.37	0.48	0.15	0.7	0.6	0.85
Potri.002G231900	3.85	5.94	4.86	14.9	17.28	15.83	9.35	9.51	8.85	8.36	9.61	7.75	9.8	7.12	8.02	5.54	5.45	5.98
Potri.002G232700	0.04	0.04	0.05	0.23	0.35	0.32	0.2	0.2	0.18	0.12	0.14	0.21	0.11	0.17	0.07	0.03	0.09	0.04
Potri.002G233000	0.18	0.03	0.1	1.78	1.48	0.74	0.38	0.45	0.89	0.41	0.93	0.52	0.49	0.32	0.44	0.26	0.44	0.6
Potri.002G233600	4.04	3.93	3.91	10.4	10.39	9.73	4.26	5.22	5.84	4.04	4.33	4	7.99	10.14	10.33	4.9	4.51	4.3
Potri.002G233800	4.82	4.24	5.06	2.36	2.3	2.27	2.42	2.49	2.82	3.34	3.35	3.92	3.17	4.2	3.99	4.76	3.63	4.83
Potri.002G234300	10.52	13.12	6.26	3.7	2.33	4.94	5.3	5.7	5.8	12.94	11.81	7.25	7.47	5.43	6.3	7.8	11.06	7.92
Potri.002G235200	10.4	7.51	8.29	2.44	2.47	2.17	6.06	6.06	6.5	6.82	7.12	6.07	6.9	5.66	5.92	7.34	6.21	7.96
Potri.002G235500	0.71	0.73	0.61	3.98	4.66	4.17	1.39	2.05	1.89	1.47	1.63	1.97	1.34	1.96	1.63	1.2	0.86	1.07
Potri.002G235700	19.53	20.44	19.95	9.82	10.24	10.49	13.55	13.23	12.6	13.99	15.75	16.58	15.58	16.73	14.78	16.69	16.24	16.72
Potri.002G235800	9.2	7.66	9.24	3.17	2.59	3.3	5.7	6.72	7.39	7.53	8.2	9.48	5.82	4.15	6.85	14.59	13.99	15.91
Potri.002G236200	86.83	81.4	83.72	76.6	75.31	73.73	179.94	192.25	189.78	157.39	148.03	142.32	104.21	109	106.3	129.44	130.44	135.55
Potri.002G236300	1.31	1.22	1.08	3.32	3.35	3.87	1.09	1.05	1.19	1.19	1.3	1.13	1.25	2	1.87	1.09	1.46	1.28
Potri.002G236400	1.64	1.58	1.67	0.11	0.08	0.2	0.05	0.1	0.13	0.17	0.06	0.2	0.24	0.62	0.15	0.27	0.28	0.12
Potri.002G236500	0.43	0.88	0.44	0	0.06	0	0.05	0	0	0.18	0	0.12	0.24	0.11	0.05	0.13	0	0.46
Potri.002G236700	1.34	1.19	1.28	3.79	2.71	1.83	0.45	0.7	0.75	0.19	0.28	0.57	0.96	1.08	1.04	1.5	1.06	1.24
Potri.002G237000	12.23	12.09	11.66	26.83	27.19	27.12	9.55	11.13	9.63	12.23	12.34	8.67	14.39	13.68	12.26	13.49	13.6	13.31
Potri.002G237100	1.53	1.44	1.46	0.64	0.78	0.67	0.9	1.11	1.5	1.5	0.99	1.86	1.59	1.4	1.43	1.25	1.36	1.18
Potri.002G237400	4.16	2.4	3.95	1.07	1.31	1.11	1.9	1.75	1.88	2.17	2.7	3.3	2.91	2.8	2.69	2.98	3.09	2.82
Potri.002G237500	52.69	53.11	52.43	22.34	22.17	20.84	37.53	36.67	36.67	52.77	52.63	50.14	49.54	47.87	48.29	45.9	49.01	43.92
Potri.002G237900	17.69	22.42	19.41	8.58	9.48	8.86	16.92	15.05	15.1	19.89	20.21	21.55	15.97	16.39	13.5	18.83	18.82	18.23
Potri.002G238000	40.25	36.43	37.89	19.92	16.67	19.21	32.58	30.71	32.2	41.5	40.18	36.45	28.65	31.43	31.42	31.93	33.7	32.57
Potri.002G238800	1.16	1.65	1.81	6.96	8.27	7.34	3.56	2.1	2.9	2.2	2.3	2.37	1.45	1.78	2.03	0.99	1.17	1.57
Potri.002G239300	22.16	18.51	18.55	7.77	8.67	7.42	15.4	17.07	16.35	21.12	21.33	20.07	15.33	16.89	16.82	20.37	18.83	21.19
Potri.002G239600	3.83	4.15	4.07	1.43	1.24	1.91	2.88	2.71	2.64	2.63	3.69	3.7	3.53	3.89	3.81	3.62	3.48	2.83
Potri.002G240300	0	0.02	0.05	0.51	1.06	0.78	0.02	0.11	0	0.1	0	0.3	0.09	0.04	0.1	0.05	0.02	0
Potri.002G240700	1.23	3.42	1.41	4.9	5.17	4.55	4.16	4.7	3.83	0.29	0.23	0.35	6.69	6.15	5.71	4.11	3.99	3.63
Potri.002G241400	10.08	9.71	10.56	4.27	5.51	4.53	7.42	6.93	7.74	7.9	8.85	8.79	8.43	9.85	10.01	9.26	9.76	11.56
Potri.002G241700	73.56	75.88	72.51	24.05	24.18	27.03	113.24	110.71	116.93	62.76	61.6	59.93	68.91	65.62	63.15	86.58	86.27	90.16
Potri.002G242500	17.25	15.59	16.44	55.58	58.69	55.61	22.48	24.47	24.93	25.27	24.86	21.64	27.83	21.61	24.23	18.92	19.56	21.52
Potri.002G242700	3.88	3.87	3.56	10.61	10.96	11.53	9.98	10.23	9.96	7.75	7.52	7	8.29	7.99	8.56	5.88	5.09	5.96
Potri.002G242900	23.23	23.85	22.95	8.88	8.9	8.45	21.8	20.13	21.29	21.99	22.64	22.93	18.95	18.83	16.77	22.2	22.73	21.46
Potri.002G243000	5.39	4.95	5.07	12.18	11.13	11.99	4.82	5.46	5.13	5.01	3.91	5.25	6.13	6.02	6.17	5.14	5.17	4.97
Potri.002G244400	29.63	27.97	25.48	3.3	3.5	2.61	19.57	20.35	20.58	19.18	18.22	20.08	19.23	16.91	16.74	29.49	27.6	27.8
Potri.002G244500	1.64	1.01	1.25	2.6	2.7	3.17	1	1.97	1.73	0.6	0.69	0.71	0.98	0.77	1.54	1.81	1.41	1.28
Potri.002G245100	1.17	1.01	0.8	0.67	0.42	0.47	0.63	0.66	0.72	0.29	0.8	0.67	1.11	1.24	0.85	1.02	0.66	0.78
Potri.002G245700	2.1	2.2	3.05	5.45	5.75	5.29	2.54	1.98	2.57	1.97	2.33	2.39	3.35	3.29	3.73	2.15	3.08	3
Potri.002G246100	36.51	34.65	34.11	14.6	15.62	14.45	26.96	28.65	27.05	37.26	37.84	37.45	26.7	28.27	30.08	31.51	31.76	28.42
Potri.002G246200	1.86	4.04	2.97	0.99	1.19	0.77	1.2	1.56	2.01	2.93	3.44	1.85	1.81	3.2	1.36	2.42	1.79	1.87
Potri.002G246400	1.58	2.53	2.13	10.96	11.88	12.57	4.55	5.66	4.64	3.93	3.49	3.83	2.82	3.45	2.69	2.77	2.43	2.56
Potri.002G246600	191.1	187.5	184.1	88.55	88.58	85.8	186.77	187.08	190.98	235.05	236.7	242.93	178.58	179.69	186.42	182.44	177.45	172.48
Potri.002G247400	2.11	2.37	1.82	2.21	2.22	2.15	0.92	1.04	0.99	1.63	1.28	1.52	1.25	1.16	1.1	0.97	1.29	1.61
Potri.002G247700	50.61	45.91	50.34	25.46	25.19	25.81	52.17	48.22	49.83	56.56	57.98	56.2	41.54	37.9	41.46	41.2	45.77	39.98
Potri.002G247900	6.19	7.29	6.03	20.45	20.56	22.07	7.42	8.65	9.33	6.9	6.67	5.79	10.1	10.63	11.15	9.77	8.14	7.73
Potri.002G248300	302.23	300.86	297.21	121.8	124.98	124.01	433.99	430.87	439.08	353.16	360.44	368.18	332.19	339.4	332.32	335.73	330.97	329.26
Potri.002G248500	0.62	0.9	1.03	6.38	6.75	7.71	3.26	4.03	3.49	1.36	1.36	1.29	1.76	2.06	1.89	1.2	0.77	1.36
Potri.002G248900	4.2	4.06	3.06	6.37	5.68	6.63	8.99	8.72	8.41	3.86	3.06	2.53	9.83	7.9	8.33	10.78	9.51	10.78
Potri.002G249100	1.17	1.1	1.31	0.28	0.38	0.41	0.97	0.98	0.91	1.31	1.2	0.79	1.07	0.92	0.77	0.97	1.1	0.74
Potri.002G249700	2.21	2.09	2.07	4.55	4.78	4.83	3.51	3.7	3.18	2.58	2.47	1.81	1.27	1.79	1.38	2.21	2.16	2.69
Potri.002G249900	8.21	7.89	6.53	1.71	1.37	1.43	1.01	1.76	1.74	2.92	3.02	2.24	3.55	4.02	4.79	2.93	2.62	2.7
Potri.002G250000	1	3.27	1.69	8.17	5.71	6.31	4.36	4.61	5.27	3.38	6.56	5.1	4.41	3.65	2.68	2.96	3.16	3.75
Potri.002G250100	0.13	0.19	0.33	2.32	3.16	1.28	0.49	2.05	0.44	0.51	0.39	0.5	0.57	0.75	0.18	0.14	0.45	0.41
Potri.002G250800	4.3	3.85	3.44	18.79	18.25	19.9	3.94	4.35	4.93	3.42	4.71	5.1	7.46	6.99	6.95	5.03	4.53	4.95
Potri.002G251000	28.92	24.88	26.02	96.55	93.01	102.87	16.62	16.48	18.46	19.84	19.19	18.09	34.3	30.49	31.03	17.45	18.54	19.67
Potri.002G251600	11.12	10.24	11.36	24.96	24.95	24.94	13.59	13.3	14.24	12.05	13.9	14.61	12.93	12.06	13.18	8.75	11.05	8.59
Potri.002G252200	11.31	8.94	8	12.29	13.76	11.02	5.49	5.75	5.15	4.35	4.94	4.16	9.41	9.11	7.39	5.28	3.2	4.06
Potri.002G252400	35.55	30.89	26.92	45.46	43.23	44.8	26.71	23.63	19.86	24.56	22.82	19.9	34.47	28.73	28.97	11.03	13.02	14.47
Potri.002G253400	4.99	5.13	5.7	13.22	10.12	11.4	10.63	11.8	9.82	3.42	5.39	4.78	6.72	6.89	7.75	7.68	7.02	6.2
Potri.002G255200	11.06	11.55	11.57	5.16	5.88	6.32	10.24	7.19	9.05	9.58	7.94	9.85	10.52	9.39	9.17	9	15.38	13.42
Potri.002G256100	2.04	3.62	4.43	0.86	1.27	1.07	2.31	4.48	3.47	2.85	3.14	3.79	2.45	3.1	1.78	3.41	3.14	3.07
Potri.002G256400	15.75	17.02	16.13	27.64	27.58	29.1	5.9	6.65	6.38	8.51	7.62	8	15.41	16.37	14.27	13.09	15.65	14.63
Potri.002G257500	187.84	189.16	186.14	99.16	97.16	96.64	187.84	203.08	203.04	211.2	202.85	214.02	213.31	199.9	200.18	193.75	197.19	205.58
Potri.002G257600	9.81	8.25	4.9	24.78	23.27	22.86	6.82	7.96	10.77	10.88	7.77	8.28	6.97	9.58	8.14	8.33	8.11	7.92
Potri.002G257700	25.25	22.1	23.28	92.68	81.41	88.73	48.59	46.78	48.67	31.99	29.73	27.99	35.05	38.45	40.91	36.53	36.36	36.96
Potri.002G257900	24.75	24.8	24.29	120.26	130.44	120.58	88.67	80.7	83.2	90.05	95.9	84.9	70.85	51.06	61.48	51.45	62.3	51.7
Potri.002G258500	1.07	0.79	0.59	10.19	8.48	8.94	3.02	3.08	3.03	3.34	2.77	2.64	2.9	2.82	3.12	1.94	1.53	1.95
Potri.002G258800	1.67	1.48	1.55	0.53	0.49	0.39	0.76	0.86	0.9	0.87	0.94	1.04	1.62	1.63	1.47	1.14	1.22	1.42
Potri.002G258900	1.35	1.17	1.33	0.37	0.52	0.91	0.71	0.94	0.72	0.9	0.76	0.62	1.05	1.31	0.98	0.84	1.3	1.02
Potri.002G259000	3.69	2.75	2.69	7.93	7.82	7.49	3.69	3.24	3.27	2.57	2.46	2.62	3.27	3.26	3.24	2.77	3.05	2.93
Potri.002G259400	24.87	23.73	24.12	9.49	9.23	7.72	17.36	16.81	17.67	17.88	14.94	16.67	21.19	15.71	19.41	26.83	28.57	28.88
Potri.002G260000	0	0.04	0	0.82	0.95	1.07	0.19	0.3	0.28	0	0.1	0.05	0.04	0.47	0.34	0.11	0	0
Potri.002G260300	2.53	2.78	3	7.14	7.22	6.96	0.84	0.76	0.74	1.63	1.09	1.32	2.01	2.75	2.62	2.65	3.48	3.26
Potri.002G260800	8.79	9.26	7.9	2.79	3.22	3.06	6.2	7.52	5.28	7.07	9.6	7.69	7.8	7.08	7.83	9.23	9.54	8.73
Potri.002G261000	21.83	22.57	24.3	8.56	9.3	8.3	11.25	13.17	11.45	11.44	12.89	10.37	11.82	13.63	16.4	20.19	21.45	21.38
Potri.002G261200	1.53	2.2	2.24	0.51	0.15	1.18	1.88	1.96	1.14	2.4	2.4	2.58	0.61	1.08	1.62	1.47	2.01	1.07
Potri.002G261300	12.63	11.1	11.47	0.13	0.91	0.1	5.89	5.26	6.42	7.26	8.68	8.75	3.87	5.44	5.13	8.71	9.22	8.93
Potri.002G261800	2.96	2.77	3.12	7.6	7.16	8.32	7.34	7.21	6.9	4.46	3.98	3.75	4.63	3.7	4.73	4.29	4.53	4.68
Potri.002G261900	3.09	2.42	2.45	18.63	22.64	22.49	5.28	5.27	3.85	3.77	3.78	3.17	4.23	5.22	4.36	2.58	3.29	2.27
Potri.002G262800	1.25	1.29	1.65	4.36	4.09	5.74	1.43	1.34	1.12	1.11	1.05	1.35	1.56	1.71	1.64	1.12	1.18	1.25
Potri.002G263100	56.13	70.6	73.76	37.58	30.33	25.26	45.79	50.27	53.16	47.89	38.56	51.83	41.61	51.99	50.03	63.47	57.45	61.51
Potri.002G263300	2.73	1.24	2.97	6.28	5.67	4.88	1.91	2.58	1.56	1.22	1.55	2.26	1.67	2.1	2.57	2.27	2.54	2.43
Potri.003G000800	0.33	0.38	0.59	3.13	2.03	2.18	0.26	0.59	0.43	0.37	0.43	0.64	0.57	0.8	0.58	0.75	1.47	0.77
Potri.003G001200	1.41	1.32	0.55	5.55	5.9	6.44	2.96	2.14	3.44	2.59	3.2	3.33	2.14	2.93	2.7	2.27	2.68	1.96
Potri.003G001900	0.28	0.23	0.18	1.12	0.83	0.81	1.05	0.9	0.98	0.47	0.4	0.47	0.66	0.51	0.52	0.52	0.64	0.4
Potri.003G002100	0.98	1.4	0.93	2.02	1.97	2.1	1.97	2.85	2.47	1.29	0.91	1.12	0.86	1.17	1.56	0.79	0.62	1.53
Potri.003G002600	1.14	1.02	0.81	3.01	3.22	3.38	3.63	3.68	2.74	1.66	0.94	1.48	1.43	1.58	1.61	1.74	1.72	1.63
Potri.003G002800	2.05	1.95	1.24	5.99	6.17	7.73	5.38	6.25	6.59	3.31	2.19	2.66	2.54	2	2.45	2.76	2.88	3.57
Potri.003G003400	17.17	18.01	17.5	9	8.21	8.35	15.96	16.15	16.42	18.13	19.12	20.76	14.24	15.61	14.28	16.6	16.93	16.42
Potri.003G003800	1.13	1.04	1.72	7.02	7.69	7.12	4.43	4.32	5.2	5.32	5.04	5.13	2.93	2.43	3.09	1.91	2.66	2.39
Potri.003G004000	14.62	14.84	15.74	46.36	51.77	45.34	13.54	14.24	15.66	11.36	14.34	11.17	15.29	14.99	16.01	17.34	16.85	15.2
Potri.003G005400	0.43	0.56	0.11	1.28	0.95	0.95	0.53	0.18	0.96	0.17	0.45	0.33	0.4	0.76	0.42	0.42	0.11	0.7
Potri.003G006000	1.05	1.13	0.79	3.37	3.54	2.8	1.97	2.17	1.93	1.69	2.32	2.41	2.27	1.94	3.02	1.6	1.58	2.32
Potri.003G006100	3.75	2.98	3.97	11.49	9.94	12.32	3.41	3.94	3.67	3.1	3.35	3.2	4.6	3.96	2.73	3.63	3.04	5.03
Potri.003G006200	2.1	1.35	2.24	2.59	2.57	2.82	0.61	0.63	0.84	0.92	0.95	1.02	1.01	0.73	1.47	1.38	1.69	1.55
Potri.003G006800	2.82	2.76	2.38	1.03	0.99	1.22	1.79	1.28	1.57	1.86	2.35	2.37	2.4	3.1	2.44	2.16	2.1	2.31
Potri.003G006900	4.42	4.46	4.27	12.41	11.61	11.36	4.76	4.61	3.97	3.6	4.66	3.6	8.29	7.85	9.26	4.11	4.32	4.16
Potri.003G007700	0.92	0.81	0.84	0.77	0.72	0.82	1.46	1.63	1.22	2.01	2.3	1.93	1.23	0.95	1.09	0.84	0.72	0.65
Potri.003G008300	5.2	4.36	4.12	6.12	6.78	6.91	8.46	8.63	8.48	9.47	10.97	10.79	5.69	7.3	5.08	6.34	7.46	6.47
Potri.003G009000	105.8	102.44	100.42	46.91	48.15	45.29	90.06	88.86	88.49	66.18	68.34	76.69	93.29	86.94	95.19	94.76	91.52	100.18
Potri.003G009400	0.93	1.02	1.49	3.59	3.31	2.22	2.21	2.05	1.85	1.82	1.61	1.71	2.25	1.66	1.56	1.14	2.64	1.6
Potri.003G009600	0.66	0.79	0.6	0.11	0.21	0.11	0.54	0.84	0.48	0.74	0.79	1.02	0.32	0.44	0.55	0.56	0.69	0.53
Potri.003G009800	4.43	4.5	4.39	1.49	1.83	1.86	3.3	2.95	3.54	3.61	4.09	3.48	3.5	3.46	3.7	4.8	4.33	5.04
Potri.003G010200	22.89	22.34	20.1	47.65	49.71	48.66	23.94	24.6	22.47	22.44	18.96	20.33	31.93	31.04	30	24.65	23.51	27.97
Potri.003G010400	30.57	29.13	34.23	11.14	9.72	9.66	22.5	22.02	25.83	30.77	26.01	27.63	18.78	17.71	18.26	27.53	27.16	22.98
Potri.003G011300	6.08	4.77	4.98	8.46	6.67	6.53	2.38	2.15	1.99	2.73	3.03	2.96	4.08	3.62	5.4	4.62	5.01	5.36
Potri.003G013000	0.75	0.82	1	0.25	0.36	0.34	0.7	1.2	1.17	0.65	1.27	0.83	0.66	0.51	0.71	0.59	0.36	0.78
Potri.003G014200	0.71	0.45	0.49	0.91	2.11	1.8	0.91	0.86	0.76	1.48	0.63	0.47	0.8	0.69	1.38	0.77	0.71	1.12
Potri.003G015000	0.17	0.2	0.16	0.4	0.68	0.47	0.09	0.04	0.08	0.1	0.04	0.18	0.14	0.33	0.1	0.2	0.08	0.13
Potri.003G015400	6.6	5.73	6.48	14.41	14.01	14.31	5.38	5.75	5.6	5.58	6.32	5.26	4.98	6.94	5.75	5.97	5.59	6.5
Potri.003G015700	6.7	8.51	7.38	3.51	3.43	3.91	5.08	4.6	4.27	5.39	5.28	5.1	6.28	4.46	5.33	5.87	5.97	6.61
Potri.003G018000	2.63	2.79	3.05	1.21	0.77	0.44	2.68	2.43	2.24	2.63	4.45	2.84	3.61	3.25	3.31	4.1	2.87	3.84
Potri.003G018700	23.27	23.45	24.19	2.63	4.4	4.04	14.44	14.54	13.09	18.88	17.72	19.06	23.71	20	22.42	21.46	24.59	25.86
Potri.003G020100	0.1	0.26	0.14	0.96	1.76	0.69	0.86	0.16	0.5	0.26	0.47	0.15	0.84	0.44	0.12	0.58	0.23	0.89
Potri.003G020200	20.99	18.59	18.7	84.46	82.54	83.86	38.86	36.12	38.09	28.37	23.41	24.76	40.71	34.22	36.56	32.71	33.33	32.85
Potri.003G020400	112.14	115.24	115.59	268.53	249.68	260.77	159.59	160.15	160.41	120.11	111.43	109.89	116.98	118.16	108.85	103.14	103.27	102.11
Potri.003G021000	1.36	1.61	2.18	0.57	0.6	0.65	0.39	0.17	0.3	0.7	0.44	0.37	0.7	0.73	0.47	0.83	0.95	0.7
Potri.003G021100	7.39	7.7	9.26	3.59	3.29	3.88	4.66	5.02	5.03	6.55	6.27	5.91	5.15	5.47	5.52	6.63	7.18	7.07
Potri.003G021900	0.99	1.57	1.77	0.36	0.65	0.49	0.89	1.5	0.98	0.72	1.07	1.31	1.47	0.76	1.01	1.65	1.07	1.35
Potri.003G022900	0.49	0.65	0.46	3.52	4.17	3.52	1.96	1.35	1.43	1.63	1.88	2.1	1	1.26	0.79	0.7	0.61	0.53
Potri.003G023800	12.62	13.23	13.02	7.25	6.54	6.9	14.13	13.68	13.79	14	14.29	13.79	11.59	11.75	12.73	11.98	12.14	11.51
Potri.003G024200	1.43	1.97	1.46	3.92	3.52	4.36	2.8	2.81	2.68	2.89	2.06	2.53	1.48	2.64	3	2.04	1.86	2
Potri.003G024600	2.07	1.9	1.72	4.44	4.29	3.8	2.98	3.17	3.41	2.77	3.19	3.02	2.19	2.73	2.8	2.7	2.28	2.54
Potri.003G024800	1.66	2.77	2.16	4.86	5.54	5.21	4.23	4.86	4.86	3.07	3.13	3.03	3.63	3.97	3.35	3.02	2.95	2.35
Potri.003G024900	1.74	1.74	1.58	5.05	4.12	4.7	3.25	3.01	3.36	2.02	2.2	2.01	2.37	2.76	3.94	2.32	2.37	2.64
Potri.003G026100	1.41	1.74	1.17	1.13	0.65	1.22	0.78	0.27	0.46	0.88	1.42	1.08	1.06	0.91	1.16	0.79	0.95	1.22
Potri.003G026300	0.02	0.05	0.03	0.16	0.21	0.4	0.06	0.04	0.11	0.08	0.23	0.04	0.08	0.07	0.04	0.05	0.04	0.04
Potri.003G026600	0.9	1.14	0.72	2.61	2.72	2.87	0.55	1.23	1.04	0.63	0.95	0.77	1.07	1.6	1.71	1.05	1.04	0.57
Potri.003G027600	0.1	0.22	0.05	0.31	0.29	0.5	0.28	0.27	0.2	0.11	0.3	0.41	0.12	0.14	0.14	0.13	0.14	0.19
Potri.003G030200	1.04	1.05	1.27	0.45	0.45	0.27	0.51	0.3	0.72	0.86	1.25	1.33	1.29	0.65	0.69	1.14	0.92	1.07
Potri.003G032600	0.08	0.28	0.09	0.84	1.25	1.05	0.41	0.51	0.49	0.25	0.55	0.42	0.19	0.25	0.2	0.34	0.46	0.17
Potri.003G032800	37.22	37.56	38.25	46.56	48.37	47.04	19.2	17.5	20.07	24.5	24.5	25.47	33.16	35.62	31.76	31.93	32.02	30.44
Potri.003G034600	2.64	2.22	2.73	12.83	15.47	12.52	2.66	3.09	2.5	2.56	2.07	2.88	23.77	23.18	20.79	4.65	6.72	6.57
Potri.003G034700	2.07	1.65	2.21	4.43	4.49	4.16	1.22	1.17	1.62	1.28	1.69	2.05	2.35	3.07	2.52	1.55	1.16	1.44
Potri.003G035500	1.16	1.45	0.66	0.24	0.32	0.03	0.88	0.47	0.4	0.72	0.91	1.6	0.43	0.51	0.41	0.64	0.68	0.98
Potri.003G035700	3.07	3.05	3.05	0.75	1.16	1.05	2.01	2.5	1.49	1.79	2.31	2.36	1.69	2.15	1.99	1.98	2.42	2.36
Potri.003G036200	0.53	0.78	1.12	1.92	2.63	1.94	2.41	1.48	2.01	1.2	1.3	0.69	1.34	0.73	0.9	1.48	2.04	0.77
Potri.003G037000	2.69	2.55	4.45	1.63	1.3	1.63	2.32	1.89	1.88	1.52	2.06	2.69	1.68	2.09	1.73	2.25	2.52	2.22
Potri.003G037300	0.9	1.05	0.6	0.26	0.07	0.32	0.44	0.4	0.65	0.73	0.78	0.72	0.63	0.7	0.54	0.58	0.72	0.08
Potri.003G037700	0.19	0.48	0.36	1.57	1.22	1.06	0.62	0.56	0.25	0.64	0.43	0.25	0.3	0.09	0.26	0.57	0.12	0.65
Potri.003G038000	1.87	3.66	2.72	0.9	0.58	0.35	1.68	1.35	2.03	1.3	2.59	1.41	1.86	1.89	0.98	1.74	2.65	1.82
Potri.003G038400	5.03	5.22	5.75	2.11	1.8	2.11	2.82	3.28	2.61	4.19	4	3.7	2.51	2.41	3.05	3.13	3.34	4.03
Potri.003G038500	199.39	199.11	196.17	65.92	66.66	67.52	138.25	132.18	139.86	188.59	194.21	198.01	62.34	63.67	63.72	146.56	148.67	148.06
Potri.003G038600	10.61	10.89	10.01	4.16	4.46	4.05	11.12	9.5	11.15	11.93	12.42	11.85	9.43	8.51	8.56	9.8	10.55	10.02
Potri.003G040400	0.67	0.76	0.61	1.62	1.68	2.37	2.59	1.18	2.41	1.1	1.2	1.08	1.01	1.2	1.01	1.16	0.87	1.37
Potri.003G040800	18.53	17.78	15.64	12.84	12.06	11.97	6.77	7.23	6.5	7.66	8.51	8.69	11.23	11.03	11.08	12.49	12.14	12.27
Potri.003G042700	0.55	0.49	1.05	4.87	5.65	5.65	2.03	2.32	2.15	2.2	2.35	2.83	1.64	1.89	1.95	1	1.3	0.96
Potri.003G043200	19.55	21.16	19.33	43.22	44.22	45.01	18.99	18.59	18.84	17.19	17.79	20.02	26.51	27.01	28.62	23.54	24.65	23.03
Potri.003G044500	6.52	8.04	7.86	1.85	2.21	2.05	2.58	3.57	3.7	5.37	4.97	3.76	5.1	4.61	5.01	5.11	4.79	5
Potri.003G044800	0.1	0	0.56	1.34	2.33	1.49	0.18	0	0.25	0.11	0.58	0	0.38	0.56	0.54	0.27	0.49	0
Potri.003G044900	2.25	1.66	2.04	6.44	6.45	8.25	1.65	2.08	2.29	2.24	2.59	1.8	2.74	2.7	2.92	2.17	1.58	1.86
Potri.003G045000	10.66	9.73	11.66	3.82	3.66	3.6	7.93	7.79	7.78	10.17	11.39	10.4	6.91	7.33	6.97	8.39	8.61	7.4
Potri.003G046000	0.45	0.32	0.49	2.27	1.16	1.25	1.77	1.29	1.81	0.48	1.08	0.31	0.73	0.68	0.51	0.77	1.02	1.4
Potri.003G046100	53.49	49.66	52.36	16.05	16.19	14.32	47.52	48.4	46.61	71.46	71.45	68.75	42.15	43.99	46.86	46.85	48.26	51.19
Potri.003G046200	58.41	62.99	61.73	169.49	162.84	161.81	82.94	88.17	84.3	64.43	60.53	58.99	72.88	76.5	76.3	65.85	67.65	69.84
Potri.003G046400	1.39	1.46	1.43	0.48	0.62	0.54	0.79	0.55	0.67	0.75	0.8	0.39	0.44	0.28	0.64	0.59	0.47	0.66
Potri.003G046500	2.11	2.09	1.97	0.57	0.92	0.8	1.22	0.69	0.92	1.04	1.28	0.84	1.21	0.98	0.85	0.51	1.31	0.77
Potri.003G046700	0.35	0.37	0.29	0.07	0.07	0.09	0.03	0.02	0.14	0.04	0.12	0.17	0.08	0.22	0.12	0.26	0	0.07
Potri.003G048200	4.09	3.32	3.55	2.08	1.56	1.67	4.07	3.19	2.94	1.93	3.05	3.53	3.03	3.26	3.01	2.95	3.04	3.68
Potri.003G049600	0.88	0.75	1.01	0.28	0.7	0.43	0.78	0.52	0.83	0.63	0.63	0.36	0.81	1.17	1.1	1.17	0.97	1.13
Potri.003G049800	2.05	1.53	1.33	0.76	0.67	0.76	2.17	3.66	3.27	2.16	1.9	1.92	2.33	2.13	1.51	1.62	1.94	1.84
Potri.003G050400	0.29	1.05	0.54	3.88	3.72	3.68	0.46	0.3	0.63	0.25	0.56	0.86	2.36	3.39	3.36	0.44	0.99	0.69
Potri.003G050700	0.39	0.42	0.38	1.5	1.76	1.49	0.39	0.23	0.32	0.08	0.23	0.13	0.7	0.11	0.73	0.32	0.26	0.43
Potri.003G050900	142.68	143.05	143.47	72.1	67.76	71.23	150.6	160.05	156.25	98.7	100.47	100.82	134.67	126.96	136.88	181.49	180.15	180.23
Potri.003G051100	0.1	0.06	0.09	0.32	0.38	0.51	0.03	0.09	0.16	0.02	0.04	0.08	0.22	0.3	0.22	0	0.02	0.02
Potri.003G052600	1.49	1.98	1.36	0.4	0.91	0.61	0.92	0.82	0.59	1.3	0.8	1.12	0.94	1.19	1.6	1.98	2.36	2.88
Potri.003G052800	90.29	88.95	94.39	20.73	18.32	20.49	91.09	98.84	86.29	84.75	82.01	80.24	45.99	42.87	46.54	74.69	83.36	80.53
Potri.003G052900	1.2	1.51	2.11	3.63	4.23	5.95	0.9	0.8	0.66	0.76	0.76	0.6	1.01	1.22	1.11	0.99	0.78	2.01
Potri.003G053800	8.92	8.24	8.86	21.45	20.13	21.85	9.16	10.23	8.41	8.25	8.42	7.75	9.07	7.86	8.37	7.62	7.68	8.25
Potri.003G055800	120.68	124.99	125.37	58.87	64.46	63.12	141.97	139.43	150.03	101.41	104.52	108.64	124.67	135.13	125.55	149.15	145.13	144.12
Potri.003G056900	0.57	0.62	1.06	1.97	2.2	1.95	1.15	0.63	1.35	1.45	1.24	1.48	1.58	1.62	1.29	1.93	1.04	1.49
Potri.003G057400	7.19	9.49	8.5	4.51	5.34	5.44	3.78	4.17	3.42	6.22	6.99	6.1	8.48	8.72	8.14	6.58	6.27	6.29
Potri.003G058600	1.06	1.16	0.94	10.4	10.24	10.23	4.46	4.6	3.79	3.32	3.86	3.66	3.14	4.02	3.87	2.17	2.39	2.81
Potri.003G058800	0.78	0.6	0.78	0.71	0.44	0.46	0.08	0.23	0.23	0.06	0.15	0.06	0.32	0.39	0.33	0.38	0.29	0.34
Potri.003G059200	10.98	12.46	12.6	31.38	33.52	31.26	13.4	14.36	13.24	12.7	12.77	12.02	17.89	13.63	14.38	15.45	12.59	14.81
Potri.003G059800	0.02	0.09	0	1.52	1.44	1.46	1.04	1.14	0.85	0.17	0.5	0.15	0.5	0.71	0.62	0.69	0.45	0.28
Potri.003G060000	0.15	0.04	0.05	0.7	0.59	0.53	0.23	0.19	0.12	0.25	0.23	0.21	0.06	0.26	0.2	0.13	0.05	0.04
Potri.003G060300	1.47	1.17	0.49	6.22	6.44	6.28	1.35	1.93	1.26	0.68	0.49	0.62	0.78	1.01	1.04	1.3	1.54	1.45
Potri.003G061300	5.99	6.2	9.47	24.75	24.87	25.89	10.62	13.13	14.64	18.26	16.1	13.03	15.38	15.86	13.17	11.6	10.78	11.48
Potri.003G062200	24.21	26.72	25.74	10.23	10.55	9.82	22.43	21.99	22.78	22.61	21.93	20.41	17.99	18.79	17.02	25.45	28.22	26.73
Potri.003G062400	2.77	2.94	3.55	4.05	3.95	3.99	1.86	1.41	1.64	1.44	1.02	0.58	3.25	3.06	2.58	4.39	5.63	6.29
Potri.003G063100	5.43	4.53	4.59	2.34	2.69	2.55	3.16	2.93	3.86	4.55	3.95	3.83	5.75	6.09	5.52	5.68	5.2	4.91
Potri.003G064200	0.38	0.3	0.42	0.14	0.16	0.1	0.2	0.27	0.27	0.26	0.46	0.31	0.37	0.37	0.18	0.55	0.36	0.25
Potri.003G065300	17.11	15.81	15.28	11.61	11.41	11.32	1.69	1.59	1.95	3.15	3.21	2.04	4.67	5.75	5.41	3.12	4.82	3.94
Potri.003G066400	127	133.57	122.25	367.83	374.87	363.27	140.86	147.75	150.53	69.43	73.14	71.95	234.19	240.58	241.64	98.93	100.47	103.95
Potri.003G066600	31.04	33.93	22.76	98.62	77.95	98.26	51.76	52.51	51.92	30.5	29.76	31.5	64.69	57.05	62.6	26.99	28.35	29.47
Potri.003G066800	61.76	63.61	59.29	110.61	183.04	147.93	102.3	56.5	102.23	55.77	56.47	58.4	95.92	132.34	130.34	31.04	46.77	56.41
Potri.003G067400	4.3	4.68	5.18	0.92	0.69	0.86	1.16	1.35	1.74	3.02	1.99	2.69	3.42	3.3	2.69	4.33	3.99	4.61
Potri.003G067800	22.24	22.97	23.61	11.18	10.36	9.84	21.62	23.69	25.78	26.55	24.21	25.86	16.65	16.06	14.6	21.88	20.51	21.01
Potri.003G067900	33.49	33.71	34.58	16.81	16.39	16.94	25.22	24.6	25.06	28.63	26.39	27.75	23.88	24.6	26.95	30.88	29.9	27.85
Potri.003G068300	0.67	0.42	1.13	2.3	2.18	2.05	1.04	0.97	0.65	0.94	1	0.17	0.78	0.96	0.74	0.56	0.57	0.84
Potri.003G068500	5.08	4.84	4.63	13.88	12.7	12.47	4.83	3.92	5.39	4.4	4.84	4.57	7.22	8.15	6.99	5.41	3.87	5.29
Potri.003G068900	2.12	2.92	2.99	1.91	2.16	1.32	6.78	7.44	8.81	1.16	1.29	1.92	3.81	4.39	4.55	4.34	6.48	6.02
Potri.003G070200	5.2	6.08	5.9	13.02	13.95	13.1	18.85	20.2	20	22.19	21.21	17	11.91	9.59	10.55	8.16	9.54	7.85
Potri.003G070500	2.46	2.83	3.34	0.72	0.74	0.72	0.12	0.46	0.43	0.59	0.81	0.64	0.22	0.36	0.16	0.69	0.43	0.95
Potri.003G070600	195.29	204.78	199.1	28.97	28.11	28.13	307.17	310.33	302.78	286.55	280.49	278.09	190.32	184.28	192.22	201.68	205.2	202.6
Potri.003G071100	32.02	30.48	29.07	0.66	0.79	0.93	48.84	50.61	48.19	29.66	26.92	31.19	14.35	13.1	18.38	22.85	24.94	24.93
Potri.003G071500	0.8	1.13	1.48	3.34	3.19	3.16	1.54	1.11	1.52	1.45	1.37	1.28	1.41	1.95	1.42	1.58	1.02	1.2
Potri.003G071900	5.07	5.97	6.91	1.53	1.41	1.75	11.94	11.59	10.63	13.78	11.04	10.89	7.61	5.29	7.39	6.93	6.97	6.35
Potri.003G072800	62.05	59.5	61.72	26.29	25.29	28.39	47.09	45.97	49.3	80.66	77.36	83.17	58.69	62.91	57.65	60.29	62.25	59.94
Potri.003G073200	1.54	1.76	1.56	3.18	3.81	3.52	1.24	1.36	1.48	2.16	1.58	1.61	1	1.58	1.55	1.63	2.03	1.37
Potri.003G073800	0.06	0.07	0.16	0.79	0.63	0.34	0.17	0.03	0.19	0.05	0.08	0.22	0.23	0.12	0.28	0.11	0.03	0.07
Potri.003G074500	1.86	2.54	2.16	0.55	1.11	0.76	2	1.77	1.48	2.04	1.97	2.15	2.94	3.3	3.56	2.46	3.25	2.16
Potri.003G074600	0.47	0.56	0.46	3.5	2.56	2.65	2.39	2.37	2.08	1.83	1.72	1.63	1.39	0.88	1.47	1.09	0.93	0.59
Potri.003G074700	15.34	14.73	15.77	51.1	53.26	45.74	29.48	28.79	28.15	28.61	26.36	24.25	25.76	19.87	22.28	18.8	18.95	18.22
Potri.003G075500	1.13	0.73	0.75	0.17	0.36	0.22	1.1	1.37	0.73	0.93	0.59	0.88	0.79	0.59	1.05	0.79	0.29	0.85
Potri.003G076000	38.84	34.58	31.2	0.67	1.28	0.52	30.03	29.06	29.8	21.67	23.24	21.2	27.73	26.38	25.62	38.29	33.99	42.31
Potri.003G076200	0.12	0.07	0.03	0.66	1.06	0.6	0.13	0.25	0.15	0.3	0.05	0.66	0.13	0.13	0.04	0.06	0.09	0.31
Potri.003G076500	22.13	23.47	21.94	8.18	7.19	6.2	16.56	15.76	15.9	18.82	19.48	18.62	19.95	19.48	21.33	22.17	19.25	21.07
Potri.003G076900	0.11	0.25	0	0.71	0.66	0.62	0.29	0.29	0.31	0.2	0.09	0.38	0.14	0.4	0.44	0.18	0.25	0.26
Potri.003G077200	2.04	1.43	2.88	9.04	8.62	7.74	2.96	3.44	2.71	3.04	2.43	2.24	3.33	2.67	2.48	2.76	2.75	2.85
Potri.003G079300	0.38	0.22	0.47	0.75	1.61	0.87	1.11	1.17	1.01	0.7	0.46	0.56	0.78	0.81	0.49	0.42	0.22	0.45
Potri.003G080500	0.31	0.42	0.08	0.03	0.03	0.09	0.55	0.91	0.41	0.83	0.84	0.52	0.21	0.17	0.41	0.36	0.19	0.43
Potri.003G081200	31.17	33.53	31.23	5.85	6.35	7.18	64.11	66.21	65.77	59.72	50.62	56.09	43.02	45.59	41.9	56.75	57.72	60.38
Potri.003G081500	16.07	14.4	14.37	2.4	2.62	2.46	17.89	19.58	18.81	11.8	10.24	10.89	18.47	17	17.35	27.38	25.62	25.7
Potri.003G081700	2.81	2.62	3.22	1.28	1.77	1.33	2.51	2.09	1.69	2.28	2.69	3.1	3.49	3.38	3.22	3.21	3.33	2.84
Potri.003G082300	13.99	13.65	11.8	17.13	16.59	15.16	6.43	6.93	6.43	7.57	7.66	6.43	11.08	9.76	10.28	10.06	10.36	10.4
Potri.003G082600	0.36	0.41	0.42	1.89	2.05	1.91	0.72	1.17	0.92	1.08	0.75	0.8	0.51	0.86	0.44	0.41	0.74	0.46
Potri.003G082700	242.79	238.21	242.98	118.47	116.73	112.84	337.78	364.76	355.32	271.04	262.49	255.81	261.51	245.09	261.68	243.42	237.6	238.5
Potri.003G083000	1.11	0.49	0.73	8.7	8.66	6.56	7.12	5.17	5.59	8.69	6.52	7.26	2.09	1.56	1.38	0.9	0.48	1.15
Potri.003G083200	1.49	2.45	2.15	0	0.07	0.1	0	0.23	0.24	0.11	0.06	0.16	0.68	1.01	0.86	13.9	15.07	12.4
Potri.003G083400	0.36	0.25	0.32	1.39	1.82	1.77	0.5	0.56	0.37	0.26	0.54	0.37	0.41	0.41	0.48	0.19	0.18	0.3
Potri.003G084000	0.23	0.18	0.6	0.32	0.21	0.57	0.2	0.21	0.41	0	0	0.19	1.15	1.51	1.13	2.48	1.92	1.46
Potri.003G084700	0.6	0.86	1.38	0.54	0.2	0	0.04	0.23	0.45	0.16	0.68	0.37	0.14	0.41	0.27	0.37	1.05	0.9
Potri.003G084800	0.88	0.78	0.64	0.11	0.16	0	0.47	0.16	0.26	0.45	0.4	0.6	0.66	0.39	0.25	1.3	1.12	0.46
Potri.003G085700	5.39	5.12	4.04	15.63	15.97	16.36	11.56	10.59	10.44	7.79	7.31	5.29	8.53	8.76	8.53	6.07	5.78	6.61
Potri.003G086600	0.39	0.03	0.13	0.85	1.36	1.59	0.35	0	0.58	0.21	0.07	0.17	0.18	0.27	0.11	0.19	0	0.58
Potri.003G087000	3.37	3.44	4.14	1.08	0.3	0.16	0	0.22	0	0.04	0	0	0.79	0.25	0.41	7.21	7.42	6.82
Potri.003G087100	1.8	1.65	1.46	0.54	1.16	0.87	0.87	1.12	0.91	0.65	0.73	1.1	1.59	1.62	2.16	0.96	1.59	1.45
Potri.003G087400	2.52	3.03	2.69	9.13	9.04	8.56	5.1	4.6	4.02	3.7	3.33	2.98	6.89	6.86	6.76	5.34	5.47	5.06
Potri.003G088300	1.52	1.64	1.57	0.46	0.58	0.43	0.38	0.48	0.32	0.57	0.47	0.75	0.67	0.57	0.35	0.62	0.84	0.79
Potri.003G088600	1.95	1.98	1.97	0.9	1.11	0.99	1.39	1.2	1.7	1.54	1.82	1.5	1.61	1.94	1.95	1.75	1.43	2.23
Potri.003G088800	0	0	0	0.34	0.43	0.25	0.07	0.07	0.1	0.13	0.24	0.08	0.13	0.08	0.09	0	0	0.02
Potri.003G089100	15.42	18.09	16.48	5.94	7.32	6.78	19.51	14.59	15.81	21.5	18.95	23.65	15.75	15.41	15.27	15.55	14.71	16.2
Potri.003G089200	4.01	3.05	3.79	0.87	0.24	0.22	4.84	3.88	4.7	6.06	6.6	5.02	2.87	2.98	3.71	3.52	2.34	2.44
Potri.003G089900	18.57	16.79	18.39	8.65	9.02	9.05	13.53	14.03	14.05	18.03	14.71	15.11	15.29	15.92	14.67	14.32	12.47	15.11
Potri.003G090100	7.61	8.07	6.97	2.67	3.41	3.7	6.22	6.87	5.83	9.17	7.39	8.31	5.93	5.46	4.89	6.44	5.64	6.79
Potri.003G090700	6.3	4.7	6.02	1.79	2.58	2.04	4.94	3.03	3.28	2.84	4.32	3.48	2.38	4.28	2.31	5.37	3.18	4.18
Potri.003G090800	21.9	25.28	23.61	52.53	51.65	50.17	23.59	24.09	21.47	20.85	23.82	20.8	27.64	25.99	26.49	26.03	24.56	23.06
Potri.003G091000	7.22	7.42	7.72	3.89	4.14	3.76	8.49	7.63	8.24	9.89	9.87	10.32	8.24	7.71	7.95	8.01	7.83	7.2
Potri.003G091400	1.73	1.23	0.86	3.11	3.19	2.65	1.68	1.91	1.63	1.82	2.25	1.33	1.81	1.3	2.01	2.09	2.61	2.1
Potri.003G091700	1.39	1.15	1.14	3.44	3.92	3.94	2.5	2.13	2.31	1.34	1.32	1.59	1.98	1.15	2.69	2.19	1.98	1.3
Potri.003G092100	0.57	0.88	0.4	0.76	0.91	0.42	1.75	2.28	2.63	1.66	1.12	0.86	0.48	0.58	0.26	2.7	2.98	2.94
Potri.003G092700	9.14	9.07	10.11	3.14	3.83	5.21	5.18	7.42	5.12	5.86	6.7	4.97	5.17	5.38	6.18	5.56	6.97	7.06
Potri.003G093000	4.99	5.04	3.3	3.47	2.95	3.64	2.46	3.7	3.13	3.77	3.13	3.69	2.01	1.77	1.65	3.62	3.52	3.96
Potri.003G093200	0.58	1.06	1.14	0.65	0.33	0.48	0.21	0.25	0.5	0.06	0.31	0.27	0.24	0.3	0.34	0.28	0.03	0.11
Potri.003G093500	0.27	0.16	0.06	0.87	0.73	0.83	0.61	0.38	0.29	0.2	0.53	0.52	0.1	0	0.1	0.04	0	0.38
Potri.003G093700	2.54	3.05	2.04	6.21	7.3	7.02	1.96	1.82	2.15	3	1.38	1.66	2.57	2.37	2.66	2.25	1.9	1.86
Potri.003G094000	50.57	51.51	50.05	23.39	23.69	23	37.52	37.04	34.57	34.31	33.96	33.29	39.33	38.53	39.44	35.12	39.26	38.21
Potri.003G094500	24.59	26.27	26.84	70.25	72.68	68.66	31.07	32.18	34.44	27.16	30.15	29.66	28.55	31.05	30.12	29.15	26.74	27.74
Potri.003G094700	0.1	0.03	0.04	0.28	0.25	0.39	0.09	0.38	0.18	0.3	0.41	0.4	0.01	0.16	0.15	0.17	0.07	0.27
Potri.003G094800	2.39	1.57	2.11	5.12	3.83	4.35	1.88	1.75	2.28	1.72	1.09	1.14	2.57	2.23	3.51	1.56	2.03	2.04
Potri.003G095100	3.47	2.68	3.63	0.41	0.75	0.92	3.76	4.47	5.47	5.04	4.49	5.11	2.69	1.85	2.32	2.28	1.92	2.97
Potri.003G097300	9.63	9.82	10.74	4.13	5.53	3.66	8.29	7.62	7.71	10.96	10.95	9.8	9.95	7.91	8.66	12.16	11.22	12.21
Potri.003G099700	4.41	4.39	4.03	2.14	2.27	2.17	2.87	1.94	2.77	2.5	2.49	2.87	5.99	5.49	4.86	3.76	3.86	4.45
Potri.003G099800	24.53	22.97	23.07	9.86	10.24	10.43	20.27	21.29	22.32	23.7	24.23	24.55	18.32	19.44	20.55	20.75	22.58	20.79
Potri.003G100300	34.72	35.47	35.65	10.6	11.77	12.74	25.04	24.87	23.51	30.77	29.93	27.12	25.72	29.52	32.05	30.58	31.81	31.87
Potri.003G100400	7.61	8.64	9.26	0.47	1.08	0.94	2.82	3.67	3.54	3.85	6.17	5.11	2.94	2.9	2.39	8.55	4.74	7.2
Potri.003G100500	20.31	18.84	19.49	9.66	10.42	9.11	16.5	16.66	17.1	13.23	13.94	13.73	15.94	14.65	15.11	20.52	21.71	19.77
Potri.003G100800	14.95	16.14	17.48	5.82	6.4	7.85	10.6	11.76	10.97	14.15	12.47	12.28	11.59	11.5	12.1	10.89	10.4	11.71
Potri.003G101800	16.26	17.11	17.47	22.94	23.1	23.53	8.49	7.9	6.68	11.35	10.18	9.38	16.84	19.51	18.76	16.67	15.03	14.82
Potri.003G102100	2.22	1.22	1.24	2.63	2.64	1.94	3.66	4.53	3.06	4.37	5.61	3.73	1.07	1.41	2.21	1.8	1.22	2.3
Potri.003G102200	0.71	0.23	0.57	2.76	2.18	1.74	1.91	1.79	1.64	1.27	2.16	2.9	0.66	0.87	0.1	0.56	0.23	0.24
Potri.003G103200	0.64	0.67	0.58	3.67	4.49	4.91	1.83	1.92	1.91	1.74	0.55	1.45	1.59	1.06	1.11	1.22	1.1	1.22
Potri.003G103900	1.16	0.63	1.35	0.13	0.24	0.21	0.35	0.55	0.88	0.83	0.7	0.56	1.43	1.32	1.5	2.78	3.93	3.45
Potri.003G104700	3.07	2.64	2.65	5.81	5.55	6.83	2.21	2.34	1.68	2.91	3.01	2.91	3.93	3.87	3.11	3.03	2.27	3.61
Potri.003G105200	8.56	9.17	9.69	3.24	3.57	2.73	10.54	10.61	10.87	11.23	9.59	9.95	6.78	4.78	5.87	9.72	10.19	8.23
Potri.003G105400	0.44	0.38	0.34	0.96	1.23	1.16	0.79	0.71	0.64	0.6	0.25	0.86	0.25	0.52	0.3	0.64	0.87	0.76
Potri.003G105500	2.04	1.88	1.92	1.38	1.42	0.96	2.25	1.88	2.48	1.79	1.39	1.9	2.24	1.98	2.09	4.78	3.96	4.54
Potri.003G106400	7.31	7.12	7.93	16.9	15.82	15.46	6.49	6.89	7.37	5.47	5.56	5.49	11.89	12.1	10.13	8.71	9.22	8.84
Potri.003G106600	4.16	3.84	4.69	9.18	9.18	9.52	4.12	4.21	4.21	4.34	4.86	3.42	5.77	5.36	4.96	4.25	5.43	3.95
Potri.003G106800	0.32	0.3	0.29	1.77	1.59	1.96	1.02	0.59	1.15	0.38	0.18	0.37	1.4	1.14	1.01	0.45	0.67	0.76
Potri.003G107100	0.31	0.1	0.26	3.44	2.7	2.96	1.61	1.23	1.97	0.37	0.42	0.95	0.47	0.51	0.77	0.46	0.38	0.24
Potri.003G107300	11.1	11.4	11.36	6.18	4.97	4.81	8.33	10.21	8.5	8.86	8.46	9.2	10.1	8.84	8.32	12.35	9.52	11.6
Potri.003G107900	1.65	0.96	1.03	3.8	3.55	4.67	2.19	2.03	2.84	2.21	1.92	1.78	2.37	2.44	2.86	1.12	1.39	1.45
Potri.003G108100	0.11	0.1	0.28	0.7	0.82	0.53	0.44	0.51	0.15	0.27	0.39	0.29	0.22	0.33	0.48	0.21	0.23	0.27
Potri.003G108400	0.59	0.55	0.62	3.39	3.83	3.79	1.92	1.68	1.82	1.56	1.34	1.76	0.98	1.05	1.18	0.64	1.04	0.95
Potri.003G108900	1.54	1.81	2.24	1.07	1.08	0.91	0.19	0.51	0.24	0.83	0.22	0.64	0.97	1.07	1.05	0.4	0.65	0.92
Potri.003G109200	110.96	109.4	113.16	4.12	4.45	4.17	378.88	370.89	380.51	150.64	138.63	143.92	170.36	168.15	171.58	164.19	164.91	171.35
Potri.003G109900	31.24	30	29.06	13.91	13.33	14.11	22.85	23.24	22.49	28.6	27.52	29.51	26.56	26.23	26.19	25.28	25.5	26.01
Potri.003G110000	84.62	82.29	87.22	38.84	39.67	39.37	79.47	75.88	81.39	81.75	87.82	85.06	71.03	77.74	75.41	81.47	81.13	79.05
Potri.003G110600	8.1	7.92	6.8	4.25	3.9	3.93	8.62	6.99	6.79	9.84	7.63	7.32	6.53	8.08	7.27	7.7	8.33	8.53
Potri.003G110700	6.74	7.16	6.28	2.65	3.25	2.96	10.13	9.24	9.96	9.38	10.16	10.87	6.17	6.27	6.31	5.5	6.48	6.07
Potri.003G111300	7.25	7.72	6.94	10.91	10.01	12.5	14.93	17.73	16.17	9.14	12.35	13.44	12.65	14.54	11.07	5.44	6.07	5.48
Potri.003G111400	100.78	102.17	97.14	220.94	218.36	221.51	68.75	71.87	67.5	76.14	75.37	76.1	227.31	231.34	228.96	87.16	89.11	91.4
Potri.003G111500	96.96	94.98	98.25	57.03	56.8	59.17	28.43	26.81	26.4	43.55	44.64	41.53	41.25	40.49	39.43	62.25	62.31	61.63
Potri.003G111900	1.91	1.61	2.05	0.62	0.64	0.55	1.19	1.24	0.65	1.66	1.14	2	1.81	1.17	0.94	0.96	1.54	1.81
Potri.003G112600	235.87	233.79	233.61	138.29	133.63	130.49	45.7	48.73	50.84	73.86	68.47	71.37	78.23	77.94	76.53	154.93	152.69	146.84
Potri.003G112700	8.11	7.48	8.35	30.65	31.15	30.06	7.73	7.54	9.87	7.83	8.99	8.73	14.2	14.95	13.87	9.69	9.97	11.8
Potri.003G113300	5.52	6.12	5.23	16.58	17.22	19.85	5.53	5.47	6.22	6.79	4.38	4.96	7.75	6.26	6.87	6.74	6.17	6.24
Potri.003G113500	31.41	34.32	31.88	35.52	37.04	34.26	15.17	17.23	16.66	19.85	20.25	20.38	27.99	30.46	29.89	26.48	27.23	27.48
Potri.003G113700	34.88	39.08	36.5	15.88	13.52	13.42	23.95	29.99	25.03	40.7	40.94	38.27	22.37	23	23.04	34.35	32.73	35.99
Potri.003G114000	70.5	70.86	71.42	166.3	166.35	165.7	72.95	68.02	72.43	70.23	75.09	73.06	78.15	79.41	77.72	75.6	77.57	74.46
Potri.003G114100	9.75	8.19	7.78	11.53	11.47	10.12	16.7	16.24	17.63	19.44	20.63	17.8	13.15	7.06	10.28	9.94	13.31	9.95
Potri.003G114700	5.19	3.56	3.35	1.69	2.55	2.11	1.88	3.27	2.82	2.39	3.89	3.25	4.41	4.05	5.26	3.3	4.07	3.16
Potri.003G115200	25.69	25.71	25.5	5.14	3.92	3.66	22.93	26.1	24.85	19.94	18.86	19.16	24.38	20.86	22.87	35.2	35.31	37.34
Potri.003G115400	75.11	80.47	78.45	9.21	9.39	10.15	116.22	117.63	110.31	79.19	78.68	75.83	73.14	76.05	73.07	92.82	92.87	95.52
Potri.003G115700	8.95	10.17	9.67	3.18	3.41	2.14	4.62	4.82	4.76	4.65	3.84	5.97	4.97	5.75	5.18	3.63	4.65	4.48
Potri.003G116000	60.61	58.13	58.71	24	24.32	24.4	35.49	36.63	36.94	53.29	49.57	43.21	58.38	55.22	58.22	61.69	62.28	64.16
Potri.003G116100	3.9	3.52	4.07	1.87	2.03	1.81	3.86	3.34	3.4	4.53	4.53	4.87	4.61	4.43	5.49	4.08	3.83	4.13
Potri.003G116700	1.35	1.32	0.93	6.96	6.81	6.41	1.2	1.13	1.62	0.71	0.65	1.1	1.74	0.53	1.15	1.87	1.63	1.16
Potri.003G116900	0.84	1.48	0.58	0.38	0.18	0.44	0	0.08	0.17	0.6	0.8	0.6	0.65	0.61	0.47	0.92	1.21	0.77
Potri.003G118000	2.76	3.14	3.13	6.96	6.46	6.09	5.2	5.33	5.3	5.01	5.65	4.36	4.84	3.92	4.83	3.58	3.56	3.86
Potri.003G119000	0.05	0.08	0.16	0.66	0.66	0.33	0	0	0	0	0	0	0	0	0.12	0	0.08	0
Potri.003G119100	0.35	0.38	1.02	2.79	2.94	2.23	0.65	0.62	0.85	0.37	0.21	0.3	0.72	0.39	0.87	0.19	0.09	0.44
Potri.003G119600	20.77	22	20.76	8.07	7.29	6.36	9.57	10.85	10.47	12.52	11.22	10.57	12.39	11.38	10.04	17.57	19.92	19.47
Potri.003G120000	29.9	26.87	25.62	94.4	91.85	93.53	33.82	33.03	33.23	28.35	26.72	26.28	43.94	37.92	41.16	34.09	32.2	31.87
Potri.003G120800	14.63	13.42	14.89	6.96	6.72	6.81	12.76	13.99	14.53	12.64	11.6	12.29	9.83	10.73	10.86	12.34	12.76	13.09
Potri.003G121900	19.35	20.12	18.49	8.37	9.06	8.26	18.85	18.93	19.49	16.4	18.62	18.52	15.56	14.5	14.88	18.08	19.07	19.2
Potri.003G122400	0.23	0.28	0.26	4.1	4.21	4	0.85	0.96	0.87	1.11	0.8	1.22	1.49	1.46	1.52	0.77	0.65	0.79
Potri.003G122700	0.87	0.65	0.74	0.14	0.2	0.16	0.22	0.29	0.43	0.4	0.36	0.5	0.32	0.07	0.13	0.49	0.69	0.6
Potri.003G123700	27.71	26.63	24.66	9.54	12.19	11.15	17.35	19.39	15.71	23.87	20.07	21.41	11.51	12.21	13.14	22.62	22.2	26.19
Potri.003G124400	2.34	2.11	2.29	3.9	4.39	3.57	3.66	3.02	3.46	6.27	5.11	4.33	3.29	1.13	2.29	2.32	2.76	2.35
Potri.003G124800	10.74	8.94	9.52	21.56	21.82	21.37	14.51	15.19	15.29	13.18	12.19	13.04	15.99	16.75	15.36	12.42	13.22	12.12
Potri.003G125400	4.65	4.9	5.18	16.1	16.52	15.93	7.05	8.32	7.99	6.21	6.35	8.76	5.2	6.6	5.72	5.04	4.35	4.67
Potri.003G125600	0.29	0.33	0.3	0.59	0.67	0.53	0.73	0.79	1.03	0.57	0.73	0.92	0.9	0.81	0.89	0.78	0.5	0.4
Potri.003G127800	0.97	1.18	0.86	1.95	2.57	2.69	1.63	1.78	1.55	1.33	1.95	1.67	1.8	1.83	1.62	1.47	1.58	0.82
Potri.003G128000	14.48	14.75	15.79	5.38	6.37	5.26	8.93	9.51	10.57	9.99	10.12	11.5	12.13	13.75	13.02	14.47	14.93	14.15
Potri.003G128800	21.3	20.13	19.38	9.01	8.72	8.2	12.19	11.73	12.48	13.99	15.92	11.62	15.88	15.98	16.11	26.16	27.92	26.78
Potri.003G129400	1.65	1.63	1.58	0.51	0.75	0.43	0.76	0.62	0.82	1.19	1.03	1.1	0.88	0.78	0.46	1.39	1.25	1.81
Potri.003G130000	5.45	4.89	4.25	0.76	0.88	1.12	13.4	14.34	10.9	9.18	7.69	9.07	4.45	3.66	3.89	5.24	4.43	4.53
Potri.003G130100	30.94	28.43	29.89	14.18	15.5	15.56	37.47	36.71	34.25	35.49	34.57	37.03	18.14	20.11	18.48	21.43	22.77	21.9
Potri.003G130500	0.18	0.05	0.1	0.16	0.22	0.27	0.2	0.71	0.41	0.26	0.19	0.34	0.21	0.31	0.41	0.4	0.69	0.58
Potri.003G130900	31.04	30.19	29.78	14.76	18.03	15.47	29	24.71	26.55	31.05	34.77	31.38	22.45	19.96	21.82	22.63	24.45	21.54
Potri.003G131200	9.68	8.68	8.45	17.04	15.06	15.85	1.86	1.52	1.35	1.4	1.35	1.14	11.9	12.3	11.24	10.09	10.42	9.18
Potri.003G131300	0.37	0.25	0.21	0.67	0.47	0.69	0.38	0.35	0.37	0.57	0.41	0.31	0.12	0.2	0.21	0.42	0.15	0.35
Potri.003G131400	1.52	1.88	1.44	10.4	9.39	9.45	3.46	3.28	3.24	1.83	2.3	2.6	3.69	3.42	3.8	2.38	1.49	2.74
Potri.003G131500	5.17	5.99	5.14	0.37	0.61	0.63	8.39	9.56	7.36	5.93	5.39	4.78	5.15	5.04	5.93	5.52	5.02	5.89
Potri.003G131600	102.56	109.28	101.3	480.08	467.89	462.78	200.34	207.93	198.66	189.78	195.98	189.89	139.23	123.96	120.56	94.61	96.86	100.91
Potri.003G132000	1.78	2.3	1.68	6.84	7.49	8.5	4.69	3.18	4.03	4.5	3.94	4.32	3.53	2.09	2.18	2.27	2.96	2.04
Potri.003G132300	0.35	0.26	0.17	0.65	1.09	0.57	0.61	0.56	0.2	0.42	0.12	0.22	0.91	0.27	0.46	0.29	0.98	0.46
Potri.003G132700	0.37	0.64	0.39	0.04	0.24	0.03	0.18	0.49	0.2	0.95	0.37	0.5	0.67	0.34	0.72	0.83	0.45	0.96
Potri.003G133200	0.58	0.71	0.86	0.6	0.74	0.61	2.67	2.28	3.14	1.5	1.67	2.17	0.85	1.47	0.95	0.68	0.9	0.63
Potri.003G133700	6.23	7.48	6.03	2.41	1.96	2.85	3.89	4.32	4.26	6.01	6.26	5.08	4.7	5.02	5.01	5.74	5.69	6.71
Potri.003G134100	0.66	0.81	0.76	1.98	1.88	1.78	2.82	2.48	2.45	2.46	2.77	2.84	1.59	1.41	1.7	1.72	1.45	1.67
Potri.003G134300	3.1	3.07	2.91	3.92	3.23	3.19	1.19	0.98	0.8	1.48	1.05	1.2	3	3.38	3.28	1.98	2.13	3.1
Potri.003G134500	57.52	54.04	55.76	157.73	160.58	160.87	83.74	88.8	86.49	88.41	82.59	82.75	93.94	86.99	90.64	73.79	71.68	71.89
Potri.003G134600	2.6	1.82	2.48	2.32	1.99	1.72	0.53	0.69	0.69	1.31	1.16	1.93	1.69	0.74	1.72	1.07	1.17	1.26
Potri.003G134800	1.16	1.7	2.51	0	0	0	0.07	0.37	0.2	0.17	0.18	0.17	0.11	0.22	0.57	4.21	2.97	2.78
Potri.003G136700	55.46	55.17	55.24	14.03	11.92	12.81	19.32	21.99	19.83	21.83	16.66	19.5	18.17	19.17	18.53	31.1	28.16	33.51
Potri.003G137000	0.12	0.37	0.24	0.79	0.74	0.39	0.22	0.41	0.26	0.62	0.26	0.21	0.57	0.27	0.38	0.38	0.52	0.6
Potri.003G138000	1.96	2.08	1.79	11.61	13.22	14.33	6.1	6.72	6.21	4.87	6.77	5.56	4.01	4.68	4.56	2.5	2.61	3.22
Potri.003G138100	23.62	26.26	24.13	12.95	12.29	11.04	20.92	19.72	18	22.88	22.36	24.31	17.15	16.82	16.22	23.96	27.53	24.65
Potri.003G138600	0.62	0.92	0.87	1.07	1.25	1.01	1.37	1.85	1.6	0.06	0.16	0.25	1.94	2.08	2.12	6.19	6.76	6.19
Potri.003G138700	1.88	1.86	1.8	4.01	3.67	5.71	6.86	6.22	6.16	2.68	1.84	2.82	4.01	4.18	3.98	3.71	2.99	2.93
Potri.003G138800	2.28	2.02	2.52	13.54	12.45	13.46	2.3	2.98	2.24	1.72	1.49	1.06	2.82	2.68	1.63	3.51	3.52	3.71
Potri.003G139000	36.85	35.83	36.11	17.01	15.59	15.15	32.05	30.55	31.46	34.87	32.72	35.03	28.91	25.02	26.62	35.23	34.98	33.13
Potri.003G139300	7.29	5.05	4.94	3.51	2.15	1.97	5.47	4.35	4.31	3.54	4.28	4.84	6.7	5.59	6.15	8.42	9.4	7.39
Potri.003G139600	11.99	10.48	12.33	51.34	52.43	50.94	7.82	8.68	8.51	8.35	9.43	9.36	26.97	30.21	26.33	16.7	15.58	17.47
Potri.003G140100	1.04	0.6	0.61	1.6	2.48	2.03	1.47	2.69	2.15	0.85	1.92	1.56	1.45	1.28	0.97	1.15	1.13	1.72
Potri.003G140400	4.64	4.9	3.5	4.52	4.61	4.58	2.51	1.72	1.88	3.55	3.64	2.86	3.3	3.36	3.48	3.7	3.39	3.13
Potri.003G140500	12.59	10.07	12.02	4.28	4.9	6.55	7.58	8.57	8.28	11.9	9.7	9.7	6.99	8.24	8.32	9.81	10.58	10.71
Potri.003G141400	0.7	0.56	0.65	0.14	0.36	0.12	0.1	0.07	0.17	0.06	0.17	0.37	0.05	0.3	0.03	0.65	0.64	0.35
Potri.003G141800	19.2	22.07	21.86	32.95	31.47	30.13	0.59	0.92	0.69	2.28	2.46	2.27	12	10.58	11.49	15.27	15.39	15.03
Potri.003G142000	0.92	0.91	1.11	3.21	4.07	4.38	1.93	1.79	1.8	1.23	1.91	1.44	2.29	2.89	2.27	1.51	0.72	1.4
Potri.003G142800	1.22	0.89	1.09	3.09	3.39	2.52	1.07	0.61	0.44	0.84	0.94	0.84	1.6	1.95	2.16	1.73	1.6	1.51
Potri.003G143000	18.4	18.1	17.78	8.98	9.85	8.17	10.28	11.39	9.69	13.41	14.29	14.15	11.8	12.63	13.55	14.67	12.69	14.92
Potri.003G143200	13.56	13.63	12.88	29.95	29.28	29.21	20.11	18.49	20	19.48	22.16	20.27	18.28	16	18	15.49	15.67	13.97
Potri.003G143300	0.05	0.51	0.78	4	2.71	4.78	6.58	3.93	5.24	2.69	3.13	3.71	2.75	1.53	2.19	0.54	0.21	0.32
Potri.003G143600	65.71	66.92	64.52	137.37	138.14	138.88	71.92	77.81	75.97	63.86	63.49	64.54	143.74	152.7	148.37	79.38	83.48	78.87
Potri.003G144200	0.32	0.92	0.4	1.95	2.11	2.11	1.28	1.08	0.81	0.47	0.53	0.53	1.17	0.62	0.54	0.53	0.61	0.55
Potri.003G145100	26.51	26.95	27.39	10.17	11.3	11.53	30.45	28.11	29.79	25.7	27.37	26.08	24.48	30.21	24.2	26.48	26.68	29.11
Potri.003G145300	35.08	36.95	35.67	9.88	10.18	10.67	29.5	29.6	28.68	36.38	36.84	36.69	28.52	29.59	30.7	32.24	33.4	33.11
Potri.003G145600	11.87	10	10.83	35.61	35.01	33.43	10.26	9.4	9.98	10.32	8.1	8.68	16.44	18.03	16.65	12.67	12.66	11.89
Potri.003G146800	1.38	1.05	1.67	3.68	4.65	4.5	1.67	1.89	1.93	1.55	1.79	1.44	5.78	4.19	5.42	1.32	1.86	1.58
Potri.003G147400	0	0.16	0.1	0.7	0.42	0.36	0.32	0.23	0.49	0.23	0.66	0.25	0.54	0.5	0.42	0.26	0.1	0.04
Potri.003G147600	1.61	1.48	1.74	3.99	3.3	3.92	1.46	1.42	1.04	2.23	1.39	1.75	5.57	5.1	6.3	2.05	2.53	1.64
Potri.003G147800	1.81	1.35	0.93	0.25	0.42	0.23	2.14	2.15	2.03	1.64	0.4	1.05	2.47	2.38	3.22	4.15	4.77	5.64
Potri.003G148100	1.68	1.5	1.24	12.79	12.62	12.82	4.23	3.63	2.87	3.48	4.53	2.84	5.37	5.26	5.69	2.6	2.6	3.92
Potri.003G148200	4.75	4.71	4.47	2.17	1.78	2.54	1.94	3.22	3.81	3.51	3.11	3.25	3.26	3.17	2.83	4.03	3.82	3.92
Potri.003G148900	52.67	50.09	53.12	28.62	24.84	25.57	59.17	53.87	49.72	44.61	47.5	49.59	39.91	32.42	37.27	37.97	48	43.9
Potri.003G150000	0.39	0.72	0.65	0.47	0.61	0.65	0.89	0.66	0.64	0.67	0.65	0.66	0.58	1.13	0.9	1.44	1.32	1.75
Potri.003G150100	0.5	0.6	0.65	0.09	0.19	0.26	0.17	0.49	0.5	0.59	0.48	0.48	0.26	0.45	0.37	0.65	0.45	0.32
Potri.003G150300	0.2	0.63	0.99	4.04	6.26	4.9	3.01	2.76	2.77	2.49	2.81	2.66	2.56	1.77	2	0.82	0.39	0.41
Potri.003G150700	16.43	15.1	17.56	7.57	8.29	8.82	29.12	24.32	26.13	30.96	28.84	26.81	23.23	21.77	22.75	24.39	25.24	24.1
Potri.003G150800	131.87	126.68	132.2	35.36	36.08	34.21	146.89	150.49	137.92	129.98	126.14	136.6	155.19	146.65	150.88	186.21	188.79	181.03
Potri.003G151000	5.24	4.49	4.73	3.39	3.11	2.95	11.76	12.06	11.57	16.19	13.26	14.75	7.17	5.94	7.23	5.73	6.96	6.23
Potri.003G151400	4.74	4.51	3.97	11.06	10.68	9.11	6.34	4.26	4.28	3.65	5.03	4.02	5.22	6.05	5.92	4.86	4.56	5.08
Potri.003G152000	4.79	6.24	3.56	1.12	1.85	1.1	2.09	1.68	1.57	3.18	2.02	1.88	1.65	5.18	2.28	6.3	4.85	6.66
Potri.003G152100	5.72	2.57	3.89	9.09	9.66	9.3	5.8	5.57	4.64	5.53	3.78	4.18	5.05	4.95	6.59	5.11	4.73	5.41
Potri.003G152300	13.23	17.45	15.44	4.61	4.91	5.63	7.07	6.03	7.27	5.58	7.92	7.8	9.92	9.59	7.09	19.36	18.98	18.84
Potri.003G152500	1.11	0.82	0.77	6.41	6.09	4.75	3.1	1.69	2.89	2.6	1.95	1.23	2.39	1.3	2.01	0.95	2.87	1.02
Potri.003G152700	3.88	3.8	4.69	0.88	0.86	0.69	4.34	3.54	2.52	3.42	3.68	3.15	2.27	2.2	2.23	3.69	3.11	3.4
Potri.003G152900	0	0.06	0	1.7	1.42	0.8	0.26	0.3	0.18	0.1	0.15	0.1	0.06	0.26	0.08	0.06	0	0.1
Potri.003G153100	6.19	5.92	6.87	2.98	2.17	3.41	3.56	4.9	6.62	5.12	7.33	7.58	5	4.14	3.73	3.59	6.19	4.83
Potri.003G153500	3.38	2.23	2.27	1.41	1.22	1.12	1.48	1.56	2.67	2.4	1.71	2.81	1.33	2.22	2.1	1.14	2.12	0.51
Potri.003G154500	1.67	1.72	2.06	1.92	1.31	2.11	1.31	0.79	0.48	0.93	1.42	1.07	2.28	2.21	1.65	0.82	3.22	1.35
Potri.003G155700	0	0	0	0.9	1.54	0.66	0.47	0.99	0.66	0.4	0.15	0.14	0.16	0.87	0.27	0.18	0.13	0
Potri.003G156000	0.73	0.97	1.21	1.93	2.17	2.51	2.72	2.88	2.62	0.98	1.78	3.13	3.09	2.96	3.58	1.6	2.02	0.92
Potri.003G156200	2.7	2.37	2.49	0.59	0.58	0.47	2.77	3.07	2.77	2.99	3.73	3.79	1.89	2.45	2.17	1.47	1.78	1.58
Potri.003G156400	0.27	0.21	0.28	1.74	1.55	1.21	0.7	0.98	0.87	0.68	0.76	0.63	1.09	1.01	0.96	0.38	0.7	0.65
Potri.003G157400	10.91	9.51	10.76	5.44	4.47	4.25	8.34	8.8	8.87	8.41	8.78	11.91	9.67	10.04	11.7	8.82	10.15	11
Potri.003G157800	24.4	25.16	26.58	6.57	6.25	5.11	19.62	19.82	20.61	25.47	22.35	25.76	19.57	19.69	18.36	22.36	23.16	22.76
Potri.003G158200	18.46	18.35	19.6	7.87	7.77	8.64	15.68	14.32	16.72	14.2	12.1	12.39	16.4	14.76	15.69	19.87	18.28	19.06
Potri.003G158700	17.88	15.19	18.99	5.35	4.62	4.97	16.84	14.46	18.25	17.88	16.91	18.49	16.43	16.43	18.7	17.55	16.51	17.97
Potri.003G159300	0.25	0.43	0.39	1.05	0.89	0.78	0.74	0.8	0.4	0.29	0.36	0.33	0.33	0.2	0.26	0.62	0.58	0.59
Potri.003G159400	0.59	0.32	0.47	0.11	0.22	0.18	0.13	0.15	0	0.59	0.27	0.11	0.08	0.33	0.21	0.27	0.53	0.23
Potri.003G160000	3.89	3.55	2.27	0.72	1.13	0.83	2.29	3	2.39	2.81	2.59	2.01	2.94	2.62	2.1	6.1	6.45	6.04
Potri.003G160300	0	0.08	0.29	0.9	1.26	1.04	0.46	0.76	0.67	0.24	0.45	0.78	1.13	0.65	0.4	0.25	0.51	0.88
Potri.003G160400	2	3.51	2.19	1.08	0.96	1.04	1.76	2.14	2.58	1.09	1.24	1.05	3.68	3.85	4.23	4.9	5.83	6.35
Potri.003G160500	5.19	5.42	5.7	20.27	18.3	14.73	6.49	4.62	4.38	4.42	3.37	3.11	6.96	6.93	6.76	6.31	7.41	8
Potri.003G161300	3.74	4.44	5.87	1.05	1.15	1.29	1.14	1.13	1.2	1.28	2.44	1.7	2.62	2.63	1.84	3.94	3.6	3.61
Potri.003G162000	0.38	0.36	0.11	0.86	1.21	1.28	2.97	2.5	2.8	3.09	3.56	2.93	1.7	1.03	1.13	0.44	0.96	1
Potri.003G162400	1.36	1.26	1.38	4.25	4.11	5.29	1.85	1.59	1.6	1.52	1.75	1.97	1.66	2.04	1.9	1.58	1.01	1.76
Potri.003G162500	44.66	42.33	45.41	17.52	15.87	18.57	17.08	19.32	17.83	20.27	21.53	21.06	33.24	29.95	32.78	55.76	51.26	51.71
Potri.003G163400	3.04	1.26	1.82	1.22	0.75	0.64	4.93	7.82	5.62	4.01	5.69	4.74	1.55	1.37	2.86	1.76	0.75	2.71
Potri.003G163700	3.01	2.4	3.37	0.53	0.69	0.93	2.76	2.37	1.96	1.84	2.39	2.22	4.19	3.99	3.61	2.63	2.55	3.29
Potri.003G163800	11.6	9.41	11.11	2.62	2.06	2.53	4.12	4.26	5.04	6.21	7.78	6.52	4.71	5.22	5.31	7.07	7.14	7.22
Potri.003G163900	16.71	15.75	11.74	1.75	0.99	0.92	4.04	5.25	7.04	6.03	11.6	7.87	8.89	8.08	4.56	6.47	6.6	7.39
Potri.003G164000	80.63	76.12	75.92	24.69	23.71	20.3	75.94	82.35	83.65	135.94	131.02	127.32	64.27	55.85	67.5	89.62	95.26	86.2
Potri.003G164200	0.32	0.47	0.71	2.96	2.81	2.83	1.1	1.05	1.36	1.49	0.9	1.09	1.93	0.9	1.67	0.73	0.51	0.53
Potri.003G164600	33.02	31.67	31.29	16.6	15.56	17.21	34.74	34.35	31.54	35.74	39.73	35.56	29.11	33.65	33.98	33.47	29.39	32.75
Potri.003G164700	3.62	4.39	3.25	0.47	0.92	0.72	3.83	4.3	3.82	4.25	6.37	5.22	3.68	3.07	3.28	3.25	3.12	2.4
Potri.003G165000	1.17	1.92	1.16	1.23	1.2	1.32	5.93	6.39	6.91	1.16	1.34	1.39	2.59	1.93	2.28	1.54	1.68	2.03
Potri.003G165500	1.98	1.13	2.62	0.94	0.8	0.71	9.04	7.15	6.98	6.53	5.28	4.09	3.75	2.18	2.81	4.16	4.07	3.98
Potri.003G165600	1.59	1.22	1.7	1.24	0.85	0.86	5.95	6.05	7.13	4.5	4.47	6.06	2.04	1.95	2.67	1.81	2.62	2.07
Potri.003G165700	1.34	0.75	1.04	0.36	0.29	0.54	2.5	2.19	3.11	1.83	2.18	2.03	1.21	0.95	1.35	2.02	1.83	1.37
Potri.003G167100	15.85	17.22	16.92	38.98	41.29	40.43	17.62	16.8	15.42	12.99	12.57	11.6	27.27	25.3	25.1	14.82	13.71	15.05
Potri.003G167400	6.08	6.35	7.26	18.49	19.62	20.05	13.92	12.8	14.17	9.14	11.57	9.22	12.97	9.17	9.52	19.28	18.96	21.12
Potri.003G167500	17.88	14.21	17.31	1.31	1.65	1.05	30.51	33.18	34.05	16.99	19.54	17.73	12.98	16.17	16.3	16.29	16.26	15.71
Potri.003G167800	5.75	6.17	6.3	2.14	2.92	2.79	3.54	4.49	3.64	4.51	5.03	4.89	4.11	4.58	4.53	3.91	4.27	4.63
Potri.003G168300	14.26	17.15	16.7	23.14	22.15	22.81	7.95	8.41	7.66	8.54	6.97	6.85	15.86	15.34	14.91	14.41	14.62	15.25
Potri.003G168700	6.37	5.71	5.88	31.4	33.64	28.62	21.33	16.34	19.76	16.29	14.94	16.21	13.04	10.7	10.63	9.65	7.13	8.87
Potri.003G169100	1.93	1.43	1.53	0.46	0.33	0.65	0.53	0.44	1.03	1.29	0.97	1.34	0.68	0.95	1.35	2.87	1.49	1.79
Potri.003G169300	2.6	2.15	1.72	8.13	8.63	8.66	1.91	3.11	2.13	2.33	1.93	2.4	3.8	3.22	3.46	2.73	1.95	2.41
Potri.003G170700	16.99	20.89	19.77	9.49	7.23	8.44	16.75	18.54	15.67	15.44	18.99	18.51	15.5	12.14	14.24	20.12	15.91	20.82
Potri.003G171200	19.01	20.04	19.89	7.4	7.85	7.27	16.27	14.84	16.46	17.65	18.84	19.25	13.68	14.4	14.22	19.43	18.97	17.67
Potri.003G171800	19.72	18.76	18.46	19.99	15.27	20.75	9.38	9.94	9.48	7.64	8.58	8.32	19.63	16.86	19.45	15.25	16.84	20.35
Potri.003G172100	4.04	3.8	4.39	9.21	10.12	10.63	3.66	3.83	3.84	4.81	6.16	5.01	4.62	3.61	4.57	3.84	4.96	2.75
Potri.003G173300	2.31	2.43	1.71	15.78	15.89	14.48	11.97	12.59	12.87	12.65	13.46	12.74	7.19	5.66	6.17	4.54	4.52	3.45
Potri.003G173900	96.89	95.45	94.68	35.32	36.3	37.5	99.43	98.25	93.64	75.63	75.77	84.17	121.1	118.13	115.89	116.37	111.94	119.54
Potri.003G174700	8.62	7.36	11.92	1.44	2.05	2.38	2.16	6.44	4.16	5.16	4.71	7.4	5.17	4.97	3.9	6.19	5.72	9.51
Potri.003G175000	0.53	0.34	0.37	2.46	4.34	3.33	0.24	0	0.43	0.85	1.41	1.03	0.33	0.49	0.78	0.12	0.51	1.85
Potri.003G175400	1.64	1.43	1.58	0.51	0.54	0.31	1.18	1.42	1.18	1.55	2.12	2.25	1.36	1.04	1.03	1.97	1.65	1.12
Potri.003G175900	2.69	3.1	3.25	78.26	76.96	76.35	9.48	9.69	9.32	6.42	5.99	6.51	8.38	8.23	8.84	5.53	4.92	5.15
Potri.003G176200	6.28	4.67	3.82	1.87	1.65	1.74	2.78	3.36	1.92	3.49	4.16	4.73	5.5	4.14	2.71	4.92	5.64	4.49
Potri.003G176300	0.55	0.6	0.5	1.38	1.7	2.02	1.24	1.08	0.95	0.54	0.93	1.01	0.54	0.48	0.39	1.04	1	0.74
Potri.003G176900	0.63	0.42	0.4	1.49	1.17	0.98	1.3	1.58	1.06	0.43	0.5	0.51	1.1	0.92	0.94	0.65	0.46	0.46
Potri.003G177200	2.09	2.7	2.62	0.58	0.34	0.34	1.05	0.87	1.23	0.64	1.29	1.38	1.21	1.6	1.33	2.96	2.45	2.5
Potri.003G177900	0.56	1.06	1.07	2.33	2.3	2.38	0.8	1.19	1.17	1.11	1.07	0.84	0.78	0.48	1.02	1.15	0.48	0.94
Potri.003G179500	0.83	0.75	0.93	0.84	0.85	0.76	0.53	0.46	0.4	0.23	0.29	0.49	0.78	0.51	0.9	0.57	0.47	0.65
Potri.003G179700	2.13	1.36	1.89	1.15	0.75	0.69	0.99	1.16	1.32	1.59	1.1	1.87	2.57	1.59	2.23	1.27	1.39	1.76
Potri.003G179900	0.76	0.7	0.78	2.43	1.79	3.43	1.69	1.31	1.15	0.86	0.75	0.35	2.95	1.84	1.93	1.56	1.08	2.87
Potri.003G180400	1.57	1.79	2.04	4.44	4.38	4.04	1.83	2.82	2.73	1.76	1.63	1.28	2.32	3.94	2.76	2.73	2.56	2.24
Potri.003G181900	42.9	46.19	41.53	10.1	11.09	10.73	29.83	27.78	33.79	35.27	34.43	35.24	25.52	24.45	23.12	36.25	38.71	36.05
Potri.003G182200	20.04	20.26	21.62	8.03	9.26	9.42	30.66	27.8	29.87	16.38	15	15.1	24.85	24.98	27.24	37.34	39.33	39.67
Potri.003G182600	14.92	15.71	14.93	6.72	6.61	6.74	9.27	9.3	9.25	10.69	10.65	11.05	7.09	7.81	8.29	11.26	11.58	12.11
Potri.003G182800	6.72	6.45	6.56	3.43	1.93	2.46	4.35	4.67	3.82	3.15	5.5	3.51	3.08	3.66	2.4	3.62	5.03	4.85
Potri.003G182900	5.01	3.45	3.71	1.68	1.49	1.4	2.3	2.63	3.26	0.77	2.58	1.86	0.86	1.23	3.19	2.96	2.85	3.9
Potri.003G183000	0.08	0.17	0.12	0.59	0.29	0.42	0.38	0.48	0.46	0.21	0.16	0.27	0.28	0.22	0.43	0.13	0.1	0.14
Potri.003G183300	8.68	10.86	7.66	22.24	19.64	20.6	14.78	13.57	13.55	9.62	9.25	10.68	12.2	13.73	11.2	9.88	9.21	9.51
Potri.003G183900	22.11	24.63	21.85	38.44	38.85	38.84	36.5	40.49	37.29	49.57	48.88	38.42	25.27	19.95	23.02	21.3	23.33	21.82
Potri.003G184100	1.35	0.97	0.84	3.32	2.48	3.05	1.56	0.73	0.9	1.02	1.41	1.15	1.31	0.88	1.57	1.13	1.17	0.93
Potri.003G184400	14.47	15.58	17.66	7.92	8.64	8.3	17.65	16.43	15.81	17.32	18.55	18.04	16.93	16.53	13.85	15.74	15.38	16.39
Potri.003G184800	0.39	0.45	0.18	0.8	0.72	0.9	0.33	0.39	0.38	0.28	0.11	0.46	0.42	0.26	0.48	0.42	0.2	0.43
Potri.003G185000	20.21	19.65	24.26	6.86	7.58	8.19	14.53	11.37	13.46	13.25	12.69	15.78	9.77	12.01	12.12	16.33	17.11	16.67
Potri.003G185500	3.28	2.42	2.4	1.02	1.08	1.2	3.13	2.06	2.39	2.44	2.22	2.22	2.69	3.71	2.81	2.5	2.53	2.18
Potri.003G187000	0.39	0.46	0.24	2.19	2.29	1.95	0.95	0.63	0.88	0.21	0.42	0.23	0.83	0.72	0.52	1.1	0.95	0.87
Potri.003G187200	5.06	4.94	4.48	1.98	1.8	1.57	4.97	5.92	3.19	3.77	3.28	3.95	1.64	2.04	1.91	5.42	3.94	4.95
Potri.003G187900	0.82	1.39	1.1	2.55	1.71	1.78	2.84	2.06	1.92	0.92	1.36	1.23	1.35	1.22	1.72	1.99	1.24	1.35
Potri.003G190100	7.83	8.2	7.47	3.53	4.05	3.6	7.22	5.97	7.37	7.8	8.05	7.84	7.5	7.6	7.86	8.01	6.79	6.58
Potri.003G190600	62.16	62.97	62.35	24.01	20.57	22.6	67.47	69.34	67.3	48.13	45.27	47.6	31.68	33.75	31.29	69.62	68.6	72.26
Potri.003G190900	24.13	24.16	22.33	10.98	11.85	13.13	19.11	19.13	19.67	18.75	20.63	21.91	19.47	19.19	21.77	22.29	20.89	22.53
Potri.003G191200	0.33	0.33	0.2	0.64	1.03	0.52	0.91	0.58	0.91	0.76	0.55	0.64	0.93	1.03	1.1	0.47	0.68	0.21
Potri.003G192200	28.38	29.19	28.36	43.08	40.45	35.48	25.75	23.37	25.7	21.28	21.86	20.27	12.66	12.97	13.92	19.32	18.98	20.01
Potri.003G192300	19.9	17.91	21.18	7.67	8.54	9.17	10.65	10.05	10.81	14.35	13.12	14.26	11.3	12.41	10.65	11.13	10.67	11.33
Potri.003G192500	17.11	19.58	16.33	45.9	49.45	47.17	24.87	23.54	25.32	27.53	23.7	22.01	32.27	27.53	29.46	18.56	19.38	18.84
Potri.003G193200	0.93	0.5	0.72	0.22	0.15	0.49	0.74	0.21	0.49	0.44	0.21	0.39	0.41	0.57	0.58	0.03	0.27	0.16
Potri.003G193600	5.75	7.23	7.65	4.05	3.88	2.97	6.21	5.8	5.9	6.34	6.45	7.01	9.04	8.51	9.05	6.32	5.63	5.44
Potri.003G193800	26.11	27.9	27.71	15.96	15.21	16.01	5.29	5.07	5.33	8.54	6.73	7.49	13.56	12.74	14.11	20.87	20.75	20.15
Potri.003G193900	26.37	25.63	27.92	11.52	9.68	11.44	19.02	17.9	19.64	21.31	22.25	23.64	20.45	21.16	21.09	21.54	20.61	19.32
Potri.003G194700	8.71	8.69	8.91	3.07	2.59	3.72	8.51	6.53	6.98	10.84	8.63	10.1	6.9	6.9	8.36	13.14	13.67	15.74
Potri.003G198400	0.54	0.69	0.68	1.15	1.56	0.89	0.52	0.34	0.3	0.26	0.13	0.32	0.74	0.98	0.62	0.54	0.75	0.65
Potri.003G199000	24.78	23.63	21.81	16.53	16.44	17.92	12.55	11.9	13.77	10.81	10.84	10.41	14.61	15.9	13.83	20.2	23.63	18.94
Potri.003G200600	13.27	13.77	13.05	9.67	10.2	9.07	7	6.7	7.5	5.5	5.62	5.25	8.77	7.9	8.57	11.53	12.08	11.98
Potri.003G201900	0.82	0.74	0.88	0.98	0.98	0.64	1.58	1.33	1.99	1.08	1.57	1.35	1.97	1.79	1.82	1.32	1.37	1.46
Potri.003G202100	11.78	12.86	13.17	2.64	2.26	2.12	11.51	11.63	12.51	15.26	16.71	15.63	17.17	15.25	18.53	8.58	8.6	8.96
Potri.003G202400	3.61	3.79	4.93	2.82	1.61	1.82	5.16	3.49	4.11	5.06	4.78	5.2	2.28	2.91	1.4	3.17	3.93	2.84
Potri.003G202500	420.75	412.86	396	101.32	107.18	105.2	749.95	805.37	785.77	668.66	631.08	644.37	331.45	301.93	333.86	388.28	375.7	386.77
Potri.003G202700	0.2	0.21	0.36	1.24	1.68	1.76	0.73	0.22	0.62	0.38	0.36	1.33	0.45	0.69	0.73	0.29	0.36	0.28
Potri.003G204600	0.06	0.07	0.19	1.42	1.78	1.47	0.58	0.5	0.65	0.42	0.58	0.15	0.78	0.65	0.47	0.27	0.47	0.41
Potri.003G205500	1508.64	1503.02	1481.28	185.66	179.19	186.45	604.1	617.24	596.96	924.76	906.49	882.78	683.25	620.76	649.11	1027.52	1033.87	1015.53
Potri.003G205900	1.05	0.87	1.16	2.27	1.82	1.45	1.6	0.78	1.98	0.58	0.56	0.56	2.76	2.44	2.17	0.74	0.39	0.59
Potri.003G207000	39.44	38.41	37.98	35.68	37.2	40.48	26.45	23.85	25.16	31.51	29.73	28.61	18.61	19.5	18.46	20.6	21.12	21.6
Potri.003G207400	1.11	1.48	0.96	4.21	3.76	4.34	1.37	1.51	1.3	1.47	1.51	0.87	1.52	1.38	1.99	1.68	0.95	1.57
Potri.003G207700	0.04	0.08	0	0.8	1.06	0.61	0.3	0.14	0.34	0.4	0.09	0.4	0.12	0.27	0.11	0.25	0	0.12
Potri.003G209800	0.08	0.16	0.12	2.24	1.33	1.77	0.38	0.59	0.14	0.54	0.29	0.36	0.71	0.78	0.45	0.51	0	0.42
Potri.003G210100	0.14	0.26	0.43	1.38	1.42	1.9	0.71	1	0.42	0.18	0.12	0.25	0.45	0.44	0.27	0.28	0.13	0.17
Potri.003G211300	0.68	0.71	0.72	0.86	0.88	0.97	0.95	0.92	0.86	0.92	0.8	0.73	1.17	1.02	1.85	2.08	1.8	1.86
Potri.003G212300	16.97	18.53	16.89	9.51	8.6	9.5	15.42	15.55	15.14	20.86	18.23	19.05	13.69	12.94	12.77	14.46	13.85	13.57
Potri.003G212900	2.9	3.59	2.73	10.73	13.25	12.04	6.23	8.22	7.18	3.56	3.48	4.59	6.54	5.88	7.76	3.28	3.53	3.92
Potri.003G214300	53.07	53.9	51.5	21.8	21.64	21.96	43.39	44.74	43.41	53.2	54.42	54.57	35.15	35.8	37.36	39.7	39.04	40.75
Potri.003G214400	11.85	12.82	13.15	1.26	2.14	0.95	13.75	15.02	17.57	21.62	26.83	23.53	8.59	6.41	6.64	8.96	9.34	8.12
Potri.003G214700	0.99	0.76	1.54	1.98	2.88	2.87	0.99	1	2.13	0.72	1.54	1.11	1.16	0.49	0.78	1.01	0.98	0.92
Potri.003G215400	2.78	2.11	2.27	6.13	5.57	6.65	2.67	2.01	1.7	3.4	1.97	1.68	3.11	3.84	3.43	2.05	1.57	2.23
Potri.003G216100	3.09	3.31	3.51	1.25	1.53	1.53	2.95	1.31	2.96	1.56	2.1	1.83	2.13	2.18	2.23	1.68	1.33	1.98
Potri.003G216200	3.91	3.14	3.59	14.75	14.51	13.28	5.55	5.61	5.76	4.96	2.93	3.7	6.7	6.08	7.87	4.32	5.47	4.77
Potri.003G216500	0.42	0.49	0.33	3.41	3.05	2.51	1.24	1.06	0.92	0.33	0.24	0.27	0.7	0.61	0.46	1.76	1.35	0.84
Potri.003G216600	3.64	3.58	3.05	0.12	0.18	0.11	2.8	3.04	2.15	1.07	0.97	0.98	1.81	2	2.04	3.12	4.68	2.74
Potri.003G216700	55.41	58.08	55.35	26.47	24.3	24.41	44.33	44.54	39.19	51.19	47.6	46.88	34.71	34.61	35.98	38.07	37.2	40.81
Potri.003G217600	0.37	0	0	1.55	1.83	1.65	0	0	0.49	0	0.11	0	0.48	0.17	0.25	0.12	0	0.14
Potri.003G217900	40.57	41.1	40.35	91.04	91.16	89.58	38.95	38.82	38.52	42.1	38.02	38.46	44.91	43.33	44.05	38.06	44.36	42.31
Potri.003G218000	0.19	0.08	0.58	1.18	0.92	0.91	1.65	0.71	1.18	0.78	0.83	0.45	1.26	1.34	0.97	0.77	1.45	0.89
Potri.003G218800	1.34	1.83	1.77	0.39	0.16	0.32	1.59	1.25	1.24	0.85	1.42	1.49	1.66	1.87	1.76	2.55	1.72	2.16
Potri.003G218900	6.48	6.78	6.23	14.99	15.24	15.51	7.67	6.85	7.01	6.23	5.5	6.24	5.77	5.77	5.69	7.41	7.69	6.9
Potri.003G219000	63.35	61.62	61.17	77.82	71.74	74.81	21.15	24.26	22.74	26.28	25.15	24.36	58.32	56.66	56.35	62.27	63.66	61.39
Potri.003G219700	1.83	2.63	1.84	3.19	2.63	3.38	0.46	0.37	0.56	0.72	1.17	0.57	1.31	1.07	1.98	1.72	1.34	1.72
Potri.003G220100	64.46	65.22	65.38	32.99	34.01	34.86	65.36	59.65	60.08	71.09	77.12	71.03	59.27	65.49	59.98	64.28	62.85	60.47
Potri.003G220300	36.03	35.86	33.19	87.09	88.49	83.35	39.82	39.39	41.46	41.54	40.73	40.99	41.02	38.58	38.93	36.08	38.85	35.77
Potri.003G221000	5.37	5.31	5.41	12.1	11.87	12.3	5.69	7.38	5.2	5.32	6.17	6.22	6.84	6.68	5.68	4.99	4.41	4.8
Potri.003G222200	40.93	41.72	39.3	46.97	43.44	44.33	12.91	11.23	11.39	15.49	14.45	15.56	27.15	27.62	24.25	33.02	32.55	32.97
Potri.003G222400	340.89	355.6	349.37	124.43	119.95	124.16	455.34	450.53	455	327.61	338.34	342.09	459.41	481.67	463.68	371.12	362.42	357.88
Potri.003G223400	31.74	28.74	34.55	13.19	14.4	13.47	26.18	26.09	25.1	28.91	34.74	32.59	24.98	28.77	27.34	29.37	28.28	29.31
Potri.003G223900	7.55	9.51	8.23	3.67	4.35	5.23	10.16	8.25	7.97	11.3	10.1	11.72	8.8	9.08	9.24	8.25	6.94	9.29
Potri.004G000400	0.59	1.17	0.64	1.78	2.04	1.94	1.03	1.16	1.17	0.55	0.76	0.16	1.45	0.61	1.41	0.99	1.2	1.11
Potri.004G001000	0.94	0.68	0.75	3.81	3.39	2.65	0.62	0.95	0.91	1.05	1.24	0.36	2.31	2.25	2.21	1.11	1.84	1.78
Potri.004G001200	47.55	47.62	43.57	22.19	24.43	21.7	37.08	35.03	36.03	40.24	35.83	40.18	31.23	35.25	32.13	38.98	39.56	40.21
Potri.004G001900	5.26	4.88	4.09	1.62	2.24	1.91	3.69	3.31	3.63	3.83	3.89	3.8	2.84	3.09	2.65	4.58	3.64	3.63
Potri.004G002500	1.5	1.18	1.79	0.05	0	0.03	0.7	0.59	0.47	0.71	1.03	1.66	1.26	1.75	1.79	1.55	1.47	3
Potri.004G002700	75.87	79.9	79.13	53.83	53.55	53.11	33.76	33.4	32.17	59.92	58.05	57.77	53.46	53.14	56	69.41	72.9	74.36
Potri.004G002800	11.15	10.34	9.75	4.3	6.03	4.83	8.31	7.45	7.6	9.29	9.04	7.61	9.38	9.35	9.25	10.93	10.8	10.48
Potri.004G004100	5.59	6.35	5.66	7.78	6.24	5.83	16.7	20.22	17.42	17.56	20.6	16.67	7.48	5.64	5.85	5.94	8.59	8.38
Potri.004G006500	1.28	1.94	1.92	0.85	1.79	1.31	0.35	0.54	0.95	1.21	1.29	0.99	0.69	1.97	2.14	2.04	1.72	2.88
Potri.004G006700	0	0.21	0.31	0.37	0.46	0.81	0.96	0.77	0.69	1.14	0.42	0.35	0.52	0.48	0.43	0.49	0.35	0.96
Potri.004G007800	0.47	0.32	0.19	1.2	2.91	2.11	1.44	2.57	1.91	1.15	1.3	1.28	1.13	0.37	1.19	0.18	0.26	0.6
Potri.004G009600	28.56	29.49	28.42	66.88	66.53	68.21	27.75	28.61	25.95	31.53	29.05	28.65	40.79	39.77	40.36	35.51	37.07	31.98
Potri.004G009800	0.12	0.27	0.13	0	0.14	0	0.22	0.21	0.35	0.4	0.42	0.29	0	0.2	0.3	0.76	0.97	1.17
Potri.004G010100	1.9	1.38	0.96	6.3	8.19	6.67	2.72	3.29	3.39	2.55	3.25	2.03	3.39	2.88	3.29	1.87	1.29	2.11
Potri.004G010900	5.33	5.32	4.14	4.51	4.44	6.29	20.58	20.34	19.79	18.31	15.79	18.66	5.51	5	6.87	4.55	4.8	5.42
Potri.004G012000	2.67	2.89	4.06	2.48	3.37	2.93	2.86	3.53	4.39	2.92	2.79	4.69	1.53	1.65	1.49	1.98	1.76	1.81
Potri.004G012100	31.45	31.06	29.43	50.44	47.2	49.44	32.86	34.18	35.15	24.92	23.79	23.66	71.58	69.39	69.13	36.81	32.2	34.66
Potri.004G012300	5.02	6.43	3.38	2.64	2.47	1.93	7.24	8.76	8.52	6.58	6.4	9.38	4.88	3.89	2.52	3.82	4.05	5.32
Potri.004G013500	1.5	2.01	1.71	4.2	3.93	4.38	1.45	1.36	1.82	1.66	1.85	1.64	2.71	2.56	2.36	1.84	1.33	2.49
Potri.004G013800	0.97	1.07	0.8	0.28	0.1	0.07	0.88	1.35	1.16	1.05	1.04	1.23	1.2	1.17	1.62	0.28	0.41	0.67
Potri.004G014700	0.74	0.83	0.95	0.61	0.63	0.5	1.05	1.48	1.44	0.86	0.59	0.74	1.33	1.23	1.07	1.94	2.99	1.98
Potri.004G015300	1132.78	1145.19	1142.19	2988.8	2982.62	2978.18	2252.8	2269.59	2278.91	1626.8	1700.95	1673.58	1201.5	1196.25	1227.7	1088.37	1086.14	1077.53
Potri.004G016400	0.89	1.07	0.75	4.08	5.53	5.47	3.19	2.64	3.11	1.91	1.77	1.31	1.23	1.06	1.01	1.27	1.12	1.02
Potri.004G017500	0.85	0.85	1.03	4.96	4.88	5.72	2.88	2.76	2.71	2.31	2.72	2.93	1.42	1.66	1.64	0.99	1	1.04
Potri.004G017600	5.9	5.54	4.8	0.27	0.56	0.58	1.93	1.36	1.7	1.62	1.99	1.63	2.44	2.53	2.23	5.68	5.86	5.42
Potri.004G018800	2.02	1.74	1.77	4.11	6.11	4.17	2.43	4.24	3.09	1.98	2.13	2.42	2.94	2.74	3.29	0.81	0.82	1.23
Potri.004G019400	5.52	6.02	5.52	14.39	13.61	13.79	11.11	9.45	11.05	9.64	9.64	9.51	4.89	7.11	5.09	3.53	4.97	4.37
Potri.004G019800	7	6.61	6.72	26.89	28.24	30.36	7.08	6.63	6.27	6.57	7.85	5.6	5.26	5.57	6.83	4.96	5.3	5.33
Potri.004G019900	4.62	3.59	4.51	121.43	121.8	115.64	11.2	10.64	9.13	6	5.03	5.58	11.67	12.15	13.21	5.86	4.53	3.98
Potri.004G020000	142.12	130.57	140.6	416.59	427.3	430.68	271.03	266.73	283.62	191.9	177.78	182.23	121.73	132.84	132.29	126.85	113.78	121.15
Potri.004G020100	41.94	48.25	42.52	114.7	128.34	111.78	57.37	53.59	58.27	54.78	40.52	49.17	32.14	31.74	33.22	41.76	40.68	41.3
Potri.004G020400	7.28	8.77	8.54	4.02	4.03	3.94	4.84	3.6	4.65	4.51	4.69	4.62	3.64	4.2	4.19	4.17	3.84	4.17
Potri.004G020500	14.37	18.14	14.05	70.43	74.57	71.49	40.68	39.54	40.65	51.67	49.59	49.06	43.04	42.15	39.2	14.19	15.78	15.52
Potri.004G021000	5.82	5.9	5.68	13.36	15.8	16.38	16.44	13.47	13.07	12.32	10.97	10.35	6.45	6.27	5.89	6.92	5.58	8.4
Potri.004G021300	53.49	47.57	46.86	18.7	16.62	17.63	26.53	28.98	30.2	33.8	32.28	29.08	15.75	16.13	20.73	27.59	30.17	28.89
Potri.004G022800	1.09	0.79	0.47	0.79	0.75	0.99	4.07	2.25	3.8	4.04	2.84	2.48	1.78	1.56	1.96	1.5	1.24	1.56
Potri.004G023300	0.13	0	0.09	0.62	0.4	0.67	0.33	0.16	0.16	0.11	0.31	0.28	0.22	0.43	0.27	0.04	0.32	0.47
Potri.004G023900	1.4	1.19	0.88	0.2	0.23	0.43	0.96	0.86	1.05	0.89	1.13	1.23	0.5	0.42	0.44	1.02	1.38	1.27
Potri.004G024900	0.12	0.18	0.22	0.73	0.75	0.5	0.42	0.29	0.41	0.23	0.44	0.18	1.02	0.56	0.79	0.29	0.44	0.4
Potri.004G025900	0.3	0.24	0.16	1.56	1.43	1.4	0.92	0.86	0.77	0.52	0.39	0.42	1.06	1.27	1.37	0.59	0.6	0.84
Potri.004G026000	0.75	1.29	1.55	3.57	2.42	3.12	1.23	1.32	2.27	1.65	1.41	1.6	2.04	1.86	1.9	2.94	2.13	2.38
Potri.004G026200	2.27	1.59	1.8	4.93	4.64	6.07	1.62	1.7	1.8	0.92	1.02	1.31	1.16	1.21	1.09	1.4	1.67	1.32
Potri.004G026700	3.01	2.12	2.26	2.55	2.39	2.19	1.37	0.61	0.84	0.97	1.78	1.43	1.88	1.63	1.93	2.39	2.32	2.54
Potri.004G027500	1.68	1.57	1.63	0.42	0.65	0.69	1.96	1.53	1.6	1.81	1.81	2.03	0.66	1.11	1.26	1.43	0.89	1.26
Potri.004G027600	2.04	1.28	1.72	0.5	0.62	0.56	1.5	1.64	1.52	1.87	2	1.98	0.75	1.19	1.69	1.66	2.26	1.14
Potri.004G027700	1.28	0.92	1.27	0.25	0.39	0.24	1.03	1.17	0.93	0.98	1.73	1.46	0.56	0.63	0.53	0.8	0.88	1.05
Potri.004G028800	12.34	11.69	11.19	6.04	6.47	5.67	13.85	12.5	13.63	13.45	13.75	14.1	13.72	12.9	14.26	12.63	14.67	13
Potri.004G028900	5.38	5.99	4.03	29.86	27.38	27.87	10.37	10.52	11.33	6.56	8.01	4.58	11.58	8.76	10.53	7.89	7.86	8.64
Potri.004G029400	56.28	71.37	60.14	24.18	20.57	23.23	41.75	46.1	46.99	58.65	65.04	60.87	57.58	53.33	54.43	68.25	67.65	66.04
Potri.004G029600	15.68	13.01	14.74	12.73	11.56	11.56	27.34	25.13	26.14	28.72	29.42	30.16	16.96	16.05	16.48	16.3	17.7	17.83
Potri.004G030600	0.1	0.2	0.14	0.98	0.72	0.67	0.37	0.46	0.2	0.17	0.11	0.24	0.24	0.17	0.3	0.11	0.05	0.18
Potri.004G030700	5.42	5.45	7.22	17.81	15.92	15.34	6.32	5.73	5.87	4.97	4.41	3.76	8.94	8.33	8.01	6.27	6.73	8.03
Potri.004G031300	2.05	2.31	2.36	8.14	10	10.03	3.7	2.94	2.46	2.86	2.62	1.83	2.82	2.92	2.14	1.87	1.76	3.86
Potri.004G031600	1.03	0.99	1.07	8.32	7.69	8.58	4	3.8	4.85	3.81	3.7	4.22	3.03	3.16	3.95	1.61	2.39	2.08
Potri.004G032200	5.65	3.31	3.94	17.39	18.57	16.64	5.11	4.04	4.01	4.2	3.86	3.13	5.62	4.84	5.24	6.38	6.56	5.89
Potri.004G033100	0.71	0.71	0.85	0.21	0.66	0.59	0.26	0.54	0.22	0.47	0.62	0.26	0.16	0.09	0.15	0.13	0.07	0.29
Potri.004G033300	11.27	9.5	10.75	0.43	0.96	0.48	7.23	7.84	6.79	4.76	5.45	5.66	5.22	3.46	4.88	9.22	8.92	10.08
Potri.004G034100	7.83	8.22	7.66	3.64	3.18	3.22	8.41	7.54	9.75	4.82	5.5	7.15	8.71	8.92	8.07	8.41	8.61	8.33
Potri.004G034400	19.67	17.07	17.38	1.64	2.32	2.59	12.81	12.61	11.47	10.9	11.48	10.82	11.49	11.25	14.04	19.49	19.74	20.41
Potri.004G034700	3.53	3.66	4.15	1.32	1.27	1.48	2.07	2.24	1.94	2.16	2.8	2.88	2.62	3.1	2.44	3.09	3.25	2.89
Potri.004G034800	12.74	12.28	12.39	5.5	5.17	5.61	7.25	7.37	7.26	8.31	9.7	10.9	8.3	8.58	8.23	10	10.64	10.61
Potri.004G035100	5.23	4.66	4.47	11.64	11.98	13.23	5.23	6.04	5.1	4.53	4.66	5.11	7.75	7.55	6.64	6.94	5.11	6.64
Potri.004G036400	11.63	14.06	12.97	6.33	6.55	6.55	11.23	12.13	11.14	16.09	16.03	15.84	9.44	8.15	9.14	10.48	10.68	10.59
Potri.004G036500	14.57	13.65	14	4.52	5.46	5.11	6.66	6.93	6.33	8.52	8.72	6.72	7.78	7.58	7.04	8.43	9.24	6.51
Potri.004G036800	18.45	19.16	16.29	7.03	7.9	7.45	16.56	16.42	15.92	20.53	19.56	21.89	15.58	15.16	15.59	18.19	17.57	17.38
Potri.004G036900	11.66	11.29	10.69	2.99	4.33	5.32	14.54	14.07	14.35	15.89	17.98	15.73	10.39	12.77	11.42	10.84	9.92	10.74
Potri.004G037000	25.81	24.01	25.7	12.1	13.33	12.33	28.35	26.03	29.11	35.75	36.91	33.19	26.15	25.84	26.91	24.21	24.37	24.88
Potri.004G037100	1.27	1.01	1.63	7.95	8.4	6.29	2.35	2.03	2.61	1.08	1.97	1.67	3.66	3.27	2.91	1.78	1.08	1.88
Potri.004G037200	1.21	0.55	1.02	4.31	4.72	4.46	1.4	1.7	0.83	1.67	1.84	2.01	2.39	2.45	2.14	1.1	0.86	0.77
[truncated: 5,667 more rows]
