# Supplementary material for: High temperature increased lignin contents of poplar (Populus spp) stem via inducing the synthesis caffeate and coniferaldehyde
Source: Front Genet. 2022 Sep 9;13:1007513. doi: 10.3389/fgene.2022.1007513 (PMC9500204; doi:10.3389/fgene.2022.1007513)
Supplement: Supplementary file 7 [file Table5.XLSX]

## Sheet: 0 h vs_6 h.COG.classf
#ID	Class_Name	Numbers	Genes
J	Translation, ribosomal structure and biogenesis	105	Potri.015G002200;Potri.002G188200;Potri.008G170400;Potri.006G234000;Potri.018G115400;Potri.009G041700;Potri.011G009600;Potri.003G067400;Potri.001G207000;Potri.005G024600;Potri.002G187000;Potri.002G115000;Potri.010G217100;Potri.004G094200;Potri.010G241300;Potri.001G004300;Potri.018G022300;Potri.010G216800;Potri.006G278500;Potri.015G005500;Potri.004G229800;Potri.001G248100;Potri.011G169700;Potri.00…
A	RNA processing and modification	242	Potri.001G401100;Potri.013G026000;Potri.013G013200;Potri.014G156800;Potri.007G143600;Potri.007G143600;Potri.001G327600;Potri.001G327600;Potri.001G036900;Potri.001G036900;Potri.001G036900;Potri.001G036900;Potri.004G082000;Potri.004G082000;Potri.004G082000;Potri.004G082000;Potri.003G128800;Potri.005G236000;Potri.T148200;Potri.008G073800;Potri.015G097200;Potri.006G135100;Potri.004G010100;Potri.019G0…
K	Transcription	179	Potri.009G109500;Potri.015G067500;Potri.007G016800;Potri.009G112000;Potri.015G123400;Potri.T160800;Potri.014G010900;Potri.013G036900;Potri.011G104900;Potri.004G063500;Potri.010G046500;Potri.007G050300;Potri.017G119000;Potri.019G129300;Potri.004G086100;Potri.T032600;Potri.005G235100;Potri.012G034600;Potri.018G135700;Potri.019G058600;Potri.006G014000;Potri.004G001000;Potri.005G007900;Potri.004G1726…
L	Replication, recombination and repair	78	Potri.008G112300;Potri.001G102500;Potri.010G044200;Potri.004G134000;Potri.T074500;Potri.010G136500;Potri.003G104700;Potri.002G233800;Potri.010G137300;Potri.012G045800;Potri.011G089500;Potri.014G198000;Potri.010G056500;Potri.008G192400;Potri.001G366700;Potri.001G156200;Potri.001G348200;Potri.014G041700;Potri.004G129500;Potri.010G249600;Potri.001G099100;Potri.013G110200;Potri.016G045800;Potri.001G2…
B	Chromatin structure and dynamics	17	Potri.017G092500;Potri.001G147300;Potri.001G327000;Potri.003G167800;Potri.007G095200;Potri.010G138600;Potri.005G134500;Potri.004G052500;Potri.002G113600;Potri.001G237100;Potri.014G043500;Potri.008G109200;Potri.015G088500;Potri.018G013200;Potri.002G007400;Potri.001G115600;Potri.007G006500
D	Cell cycle control, cell division, chromosome partitioning	60	Potri.013G026000;Potri.014G156800;Potri.007G143600;Potri.003G128800;Potri.009G066400;Potri.007G011500;Potri.019G033600;Potri.T120000;Potri.017G002500;Potri.T074500;Potri.012G105700;Potri.006G243200;Potri.010G111100;Potri.003G108400;Potri.002G227400;Potri.008G149200;Potri.002G156300;Potri.001G453000;Potri.T138700;Potri.012G007700;Potri.018G025100;Potri.015G074200;Potri.017G083200;Potri.004G159000;…
Y	Nuclear structure	0	--
V	Defense mechanisms	63	Potri.004G053100;Potri.013G115600;Potri.001G362200;Potri.010G011400;Potri.011G117100;Potri.008G164400;Potri.007G104800;Potri.007G096500;Potri.011G124900;Potri.001G069200;Potri.002G237900;Potri.004G034700;Potri.003G162400;Potri.015G026700;Potri.010G213400;Potri.017G074000;Potri.001G114300;Potri.002G036300;Potri.009G143400;Potri.004G016400;Potri.012G133500;Potri.015G059700;Potri.011G112100;Potri.01…
T	Signal transduction mechanisms	251	Potri.011G129300;Potri.009G036500;Potri.009G031300;Potri.005G259900;Potri.T128700;Potri.001G327600;Potri.017G075400;Potri.001G027000;Potri.011G128600;Potri.001G001600;Potri.T021200;Potri.016G102500;Potri.005G139200;Potri.005G228300;Potri.015G061400;Potri.013G009800;Potri.010G107100;Potri.005G057900;Potri.018G127300;Potri.012G090500;Potri.002G019300;Potri.002G130600;Potri.004G026200;Potri.T061300;…
M	Cell wall/membrane/envelope biogenesis	200	Potri.010G041400;Potri.001G401100;Potri.005G116200;Potri.001G237200;Potri.001G036900;Potri.001G036900;Potri.004G082000;Potri.004G082000;Potri.018G098200;Potri.001G140700;Potri.008G073800;Potri.006G063300;Potri.001G416800;Potri.011G156100;Potri.004G010100;Potri.002G132900;Potri.005G061600;Potri.011G056800;Potri.007G139000;Potri.011G071100;Potri.014G040300;Potri.T074500;Potri.014G129200;Potri.015G0…
N	Cell motility	64	Potri.013G026000;Potri.007G143600;Potri.003G128800;Potri.009G066400;Potri.002G066600;Potri.019G033600;Potri.T120000;Potri.T120000;Potri.017G002500;Potri.T074500;Potri.T074500;Potri.012G105700;Potri.T063300;Potri.006G052600;Potri.008G149200;Potri.002G156300;Potri.018G130100;Potri.005G146900;Potri.018G103900;Potri.002G257900;Potri.004G159000;Potri.004G159000;Potri.T173400;Potri.006G181900;Potri.012…
Z	Cytoskeleton	6	Potri.006G192700;Potri.019G006700;Potri.010G204300;Potri.016G045500;Potri.015G053100;Potri.008G055500
W	Extracellular structures	0	--
U	Intracellular trafficking, secretion, and vesicular transport	16	Potri.001G327000;Potri.017G127200;Potri.003G167800;Potri.016G105800;Potri.001G171200;Potri.010G138600;Potri.007G005800;Potri.018G003200;Potri.001G237100;Potri.017G127800;Potri.008G109200;Potri.002G261900;Potri.002G082200;Potri.001G387600;Potri.001G115600;Potri.007G006500
O	Posttranslational modification, protein turnover, chaperones	238	Potri.003G055800;Potri.T125900;Potri.010G059800;Potri.001G042600;Potri.007G102100;Potri.001G467100;Potri.001G224400;Potri.010G205700;Potri.001G450600;Potri.008G054000;Potri.006G035000;Potri.017G084000;Potri.014G164900;Potri.005G160200;Potri.010G084800;Potri.006G262700;Potri.015G056900;Potri.012G045000;Potri.010G113400;Potri.009G049800;Potri.018G115500;Potri.018G140600;Potri.008G214500;Potri.008G0…
C	Energy production and conversion	270	Potri.001G401100;Potri.013G013200;Potri.007G011200;Potri.007G143600;Potri.001G036900;Potri.016G094200;Potri.010G236700;Potri.004G082000;Potri.T058600;Potri.001G283300;Potri.005G236000;Potri.005G236000;Potri.016G031100;Potri.T148200;Potri.001G020900;Potri.008G073800;Potri.008G088900;Potri.006G135100;Potri.001G463400;Potri.004G010100;Potri.T120600;Potri.007G088000;Potri.001G462800;Potri.011G071100;…
G	Carbohydrate transport and metabolism	300	Potri.007G015500;Potri.009G010900;Potri.014G111800;Potri.013G152400;Potri.008G083900;Potri.003G097300;Potri.008G179300;Potri.015G074000;Potri.011G010400;Potri.004G207100;Potri.006G152600;Potri.008G211900;Potri.001G310600;Potri.016G054800;Potri.001G240300;Potri.005G168000;Potri.003G037000;Potri.007G050300;Potri.001G436200;Potri.010G104500;Potri.015G091400;Potri.010G174400;Potri.010G224300;Potri.01…
E	Amino acid transport and metabolism	117	Potri.001G248600;Potri.001G327600;Potri.001G327600;Potri.004G009600;Potri.005G115800;Potri.005G093200;Potri.004G190900;Potri.018G022200;Potri.001G403000;Potri.001G291300;Potri.010G037200;Potri.005G084600;Potri.001G160100;Potri.010G224200;Potri.006G119300;Potri.001G320400;Potri.001G225000;Potri.010G151000;Potri.002G258900;Potri.002G014000;Potri.011G122100;Potri.004G187500;Potri.012G105500;Potri.00…
F	Nucleotide transport and metabolism	81	Potri.013G080400;Potri.001G401100;Potri.001G121400;Potri.013G082700;Potri.014G156800;Potri.019G031200;Potri.008G073800;Potri.004G041800;Potri.013G043500;Potri.004G010100;Potri.011G071100;Potri.009G086800;Potri.011G124900;Potri.008G058600;Potri.010G183500;Potri.002G227400;Potri.008G080100;Potri.008G197400;Potri.013G152700;Potri.013G080500;Potri.T138700;Potri.014G017200;Potri.009G034500;Potri.006G0…
H	Coenzyme transport and metabolism	57	Potri.006G123200;Potri.001G226900;Potri.007G143600;Potri.002G189000;Potri.002G102600;Potri.015G105700;Potri.001G249200;Potri.018G120000;Potri.013G120800;Potri.005G032300;Potri.015G019800;Potri.017G002500;Potri.T074500;Potri.T074500;Potri.008G099300;Potri.004G020500;Potri.006G042200;Potri.010G153500;Potri.002G180500;Potri.013G004100;Potri.005G127100;Potri.008G106600;Potri.018G025100;Potri.018G0251…
I	Lipid transport and metabolism	167	Potri.015G099600;Potri.001G036900;Potri.001G036900;Potri.010G183800;Potri.004G082000;Potri.004G082000;Potri.002G057700;Potri.003G147400;Potri.003G015000;Potri.003G116000;Potri.010G146400;Potri.001G459400;Potri.011G164300;Potri.T120000;Potri.T120000;Potri.001G120900;Potri.014G081000;Potri.001G099600;Potri.016G034800;Potri.016G034800;Potri.011G050800;Potri.001G327000;Potri.001G327000;Potri.017G1229…
P	Inorganic ion transport and metabolism	388	Potri.001G401100;Potri.013G026000;Potri.013G013200;Potri.005G079000;Potri.007G143600;Potri.001G327600;Potri.001G036900;Potri.001G036900;Potri.010G236700;Potri.004G082000;Potri.004G082000;Potri.003G128800;Potri.002G216000;Potri.017G130100;Potri.016G031100;Potri.T148200;Potri.008G073800;Potri.006G166800;Potri.009G066400;Potri.008G088900;Potri.006G135100;Potri.019G024600;Potri.004G010100;Potri.009G0…
Q	Secondary metabolites biosynthesis, transport and catabolism	88	Potri.011G150100;Potri.002G078600;Potri.003G176900;Potri.004G139700;Potri.001G382400;Potri.005G182700;Potri.002G178000;Potri.011G112400;Potri.001G381700;Potri.009G144900;Potri.016G126600;Potri.016G107200;Potri.017G049600;Potri.011G020900;Potri.014G073700;Potri.015G133700;Potri.002G260300;Potri.004G139600;Potri.006G249200;Potri.003G119100;Potri.017G010500;Potri.001G051600;Potri.001G007100;Potri.00…
R	General function prediction only	225	Potri.008G012400;Potri.008G198100;Potri.001G389800;Potri.001G029300;Potri.002G195700;Potri.005G033400;Potri.019G094000;Potri.005G236000;Potri.007G091200;Potri.013G123600;Potri.007G050300;Potri.019G123200;Potri.005G074400;Potri.014G019300;Potri.014G098800;Potri.T120000;Potri.T037100;Potri.003G114000;Potri.006G207300;Potri.006G026500;Potri.018G103700;Potri.003G164600;Potri.019G101400;Potri.011G1635…
S	Function unknown	62	Potri.010G200000;Potri.008G044300;Potri.004G206300;Potri.008G023900;Potri.003G083400;Potri.T120000;Potri.008G109700;Potri.004G086700;Potri.007G102800;Potri.010G162500;Potri.016G063000;Potri.008G151300;Potri.T093500;Potri.002G227400;Potri.018G110600;Potri.019G129900;Potri.003G003400;Potri.008G058800;Potri.004G159000;Potri.005G046300;Potri.014G056700;Potri.006G236400;Potri.006G278000;Potri.001G1234…
X	Mobilome: prophages, transposons	0	--

## Sheet: 0 h vs_12 h.COG.classf
#ID	Class_Name	Numbers	Genes
J	Translation, ribosomal structure and biogenesis	21	Potri.011G009600;Potri.003G067400;Potri.019G040100;Potri.018G022300;Potri.003G113500;Potri.006G278500;Potri.011G169700;Potri.002G185100;Potri.014G048500;Potri.011G004000;Potri.005G070300;Potri.008G121500;Potri.010G005000;Potri.008G113600;Potri.001G016200;Potri.005G070700;Potri.005G054600;Potri.014G139300;Potri.005G049300;Potri.008G206200;Potri.013G047400
A	RNA processing and modification	106	Potri.013G013200;Potri.014G156800;Potri.016G136100;Potri.007G044300;Potri.008G161600;Potri.T148200;Potri.004G010100;Potri.011G071100;Potri.T120000;Potri.T120000;Potri.015G104500;Potri.T074500;Potri.012G105700;Potri.009G047700;Potri.015G127800;Potri.001G162600;Potri.016G034800;Potri.016G034800;Potri.016G034800;Potri.016G034800;Potri.001G152600;Potri.003G001900;Potri.004G155800;Potri.008G149200;Pot…
K	Transcription	57	Potri.009G109500;Potri.013G036900;Potri.007G050300;Potri.017G119000;Potri.001G202100;Potri.013G037000;Potri.013G122500;Potri.006G051700;Potri.010G244400;Potri.006G057500;Potri.012G031100;Potri.016G144100;Potri.007G139200;Potri.004G062900;Potri.016G049400;Potri.013G142200;Potri.003G161300;Potri.015G035500;Potri.019G093000;Potri.006G245600;Potri.T040800;Potri.013G142400;Potri.002G027400;Potri.002G0…
L	Replication, recombination and repair	30	Potri.008G112300;Potri.001G116800;Potri.T074500;Potri.010G137300;Potri.010G182500;Potri.018G071600;Potri.001G348200;Potri.014G041700;Potri.001G379000;Potri.001G099100;Potri.014G121000;Potri.009G058900;Potri.014G073600;Potri.001G067000;Potri.001G009600;Potri.001G070500;Potri.005G000500;Potri.006G135200;Potri.004G077100;Potri.012G114100;Potri.018G112800;Potri.006G249100;Potri.014G097700;Potri.004G1…
B	Chromatin structure and dynamics	6	Potri.007G095200;Potri.004G052500;Potri.018G025500;Potri.010G228500;Potri.018G013200;Potri.001G115600
D	Cell cycle control, cell division, chromosome partitioning	25	Potri.014G156800;Potri.016G136100;Potri.007G044300;Potri.008G161600;Potri.T120000;Potri.T074500;Potri.012G105700;Potri.001G152600;Potri.003G108400;Potri.008G149200;Potri.001G453000;Potri.012G007700;Potri.005G176100;Potri.012G143600;Potri.017G057800;Potri.011G122400;Potri.006G082700;Potri.016G031400;Potri.012G005900;Potri.005G138400;Potri.013G059000;Potri.006G206900;Potri.001G403300;Potri.006G0898…
Y	Nuclear structure	0	--
V	Defense mechanisms	21	Potri.011G117100;Potri.008G164400;Potri.007G104800;Potri.016G065900;Potri.018G051800;Potri.010G213400;Potri.002G107200;Potri.004G016400;Potri.012G033500;Potri.011G112100;Potri.010G074300;Potri.001G393300;Potri.009G122600;Potri.008G047900;Potri.012G033400;Potri.011G117300;Potri.005G064300;Potri.002G250000;Potri.001G058900;Potri.010G117000;Potri.001G266900
T	Signal transduction mechanisms	86	Potri.005G259900;Potri.001G027000;Potri.005G228300;Potri.010G027100;Potri.001G411700;Potri.009G070100;Potri.019G107300;Potri.018G123700;Potri.011G016200;Potri.019G048800;Potri.008G121900;Potri.008G195800;Potri.007G096400;Potri.013G133900;Potri.001G453000;Potri.002G206100;Potri.001G271700;Potri.008G121800;Potri.002G087600;Potri.012G007700;Potri.016G134600;Potri.014G080200;Potri.007G142100;Potri.01…
M	Cell wall/membrane/envelope biogenesis	110	Potri.010G041400;Potri.005G116200;Potri.001G237200;Potri.001G394400;Potri.005G033500;Potri.018G098200;Potri.001G140700;Potri.001G416800;Potri.011G156100;Potri.004G010100;Potri.002G132900;Potri.005G061600;Potri.007G139000;Potri.011G071100;Potri.014G040300;Potri.T074500;Potri.015G029100;Potri.016G034800;Potri.016G034800;Potri.014G029900;Potri.005G015600;Potri.008G130000;Potri.013G008200;Potri.017G1…
N	Cell motility	29	Potri.016G136100;Potri.001G394400;Potri.008G161600;Potri.T120000;Potri.T120000;Potri.T074500;Potri.T074500;Potri.012G105700;Potri.008G149200;Potri.007G076500;Potri.018G103900;Potri.002G257900;Potri.006G181900;Potri.012G143600;Potri.002G200300;Potri.011G122400;Potri.014G125100;Potri.004G059600;Potri.002G227300;Potri.012G005900;Potri.013G059000;Potri.008G026400;Potri.006G206900;Potri.001G403300;Pot…
Z	Cytoskeleton	4	Potri.016G136100;Potri.008G161600;Potri.006G192700;Potri.016G045500
W	Extracellular structures	0	--
U	Intracellular trafficking, secretion, and vesicular transport	4	Potri.002G248900;Potri.018G025500;Potri.010G228500;Potri.001G115600
O	Posttranslational modification, protein turnover, chaperones	76	Potri.015G087400;Potri.012G129800;Potri.001G467100;Potri.018G076600;Potri.019G062000;Potri.010G113400;Potri.018G140600;Potri.011G076700;Potri.015G087500;Potri.T178900;Potri.004G187400;Potri.009G131800;Potri.013G010800;Potri.017G130700;Potri.014G133700;Potri.004G073600;Potri.010G060100;Potri.005G256000;Potri.010G061400;Potri.001G416500;Potri.005G113100;Potri.004G057700;Potri.006G055400;Potri.013G1…
C	Energy production and conversion	130	Potri.013G013200;Potri.T148200;Potri.007G084700;Potri.004G010100;Potri.005G064400;Potri.001G462800;Potri.011G071100;Potri.005G092200;Potri.014G020500;Potri.007G083900;Potri.015G127800;Potri.001G162600;Potri.016G034800;Potri.016G044100;Potri.011G158500;Potri.009G033900;Potri.007G085000;Potri.009G064800;Potri.003G001900;Potri.009G043700;Potri.T167900;Potri.003G006000;Potri.004G155800;Potri.012G0145…
G	Carbohydrate transport and metabolism	131	Potri.007G015500;Potri.009G010900;Potri.015G086400;Potri.006G152600;Potri.007G050300;Potri.001G436200;Potri.018G126400;Potri.009G169100;Potri.001G015100;Potri.010G191900;Potri.008G110000;Potri.007G140500;Potri.008G204200;Potri.002G069000;Potri.012G126100;Potri.005G251000;Potri.016G028900;Potri.003G175900;Potri.012G002500;Potri.014G122200;Potri.015G029400;Potri.004G021000;Potri.006G128000;Potri.01…
E	Amino acid transport and metabolism	37	Potri.013G124700;Potri.010G151000;Potri.010G068100;Potri.004G187500;Potri.016G132200;Potri.008G172500;Potri.004G037800;Potri.004G106400;Potri.010G150900;Potri.010G220200;Potri.018G001600;Potri.011G006800;Potri.010G224100;Potri.009G151300;Potri.001G084000;Potri.005G162800;Potri.013G124900;Potri.008G017100;Potri.008G187400;Potri.012G070000;Potri.014G157500;Potri.001G027100;Potri.010G126300;Potri.00…
F	Nucleotide transport and metabolism	45	Potri.014G156800;Potri.019G031200;Potri.001G394400;Potri.007G044300;Potri.013G043500;Potri.004G010100;Potri.011G071100;Potri.009G086800;Potri.010G180400;Potri.001G152600;Potri.T079500;Potri.009G102700;Potri.006G096900;Potri.002G222300;Potri.008G077400;Potri.001G401300;Potri.010G183600;Potri.008G073700;Potri.008G110500;Potri.013G100800;Potri.010G171700;Potri.008G094700;Potri.006G097100;Potri.010G1…
H	Coenzyme transport and metabolism	30	Potri.016G136100;Potri.008G161600;Potri.001G249200;Potri.006G060400;Potri.015G110500;Potri.013G120800;Potri.T074500;Potri.T074500;Potri.004G020500;Potri.006G042200;Potri.001G234900;Potri.006G051100;Potri.001G340900;Potri.013G121400;Potri.017G057800;Potri.017G057800;Potri.001G380500;Potri.012G006400;Potri.016G116400;Potri.006G040800;Potri.002G189200;Potri.002G185300;Potri.003G154500;Potri.010G1135…
I	Lipid transport and metabolism	65	Potri.015G099600;Potri.003G032800;Potri.T120000;Potri.T120000;Potri.007G089500;Potri.016G034800;Potri.016G034800;Potri.002G213100;Potri.006G036300;Potri.006G036300;Potri.016G046700;Potri.T102600;Potri.008G124400;Potri.004G143200;Potri.001G424700;Potri.005G077600;Potri.007G002100;Potri.002G056800;Potri.007G059300;Potri.007G059300;Potri.009G169900;Potri.001G083400;Potri.018G148800;Potri.014G145000;…
P	Inorganic ion transport and metabolism	187	Potri.013G013200;Potri.016G136100;Potri.008G161600;Potri.017G130100;Potri.005G100400;Potri.T148200;Potri.006G166800;Potri.019G024600;Potri.007G084700;Potri.004G010100;Potri.002G083200;Potri.005G064400;Potri.011G064100;Potri.011G071100;Potri.005G092200;Potri.001G463900;Potri.014G020500;Potri.012G105700;Potri.007G083900;Potri.015G127800;Potri.009G143500;Potri.001G162600;Potri.016G034800;Potri.016G0…
Q	Secondary metabolites biosynthesis, transport and catabolism	46	Potri.002G078600;Potri.003G176900;Potri.004G022800;Potri.005G182700;Potri.014G073700;Potri.002G260300;Potri.006G151600;Potri.001G176500;Potri.012G138800;Potri.013G045000;Potri.012G049500;Potri.001G113100;Potri.009G145000;Potri.007G139600;Potri.008G160000;Potri.001G278200;Potri.005G175200;Potri.003G163800;Potri.014G145100;Potri.002G151300;Potri.010G089000;Potri.010G023600;Potri.016G117100;Potri.01…
R	General function prediction only	101	Potri.008G012400;Potri.008G198100;Potri.019G094000;Potri.009G098800;Potri.003G026100;Potri.007G080600;Potri.007G091200;Potri.007G050300;Potri.008G135200;Potri.019G123200;Potri.004G075900;Potri.T120000;Potri.010G244900;Potri.018G111900;Potri.019G121300;Potri.013G102200;Potri.017G129500;Potri.001G320800;Potri.002G257700;Potri.015G129400;Potri.009G141500;Potri.006G215300;Potri.001G307300;Potri.002G2…
S	Function unknown	23	Potri.008G044300;Potri.010G252200;Potri.T120000;Potri.004G086700;Potri.013G099600;Potri.007G102800;Potri.012G133900;Potri.006G025200;Potri.019G129900;Potri.006G278000;Potri.016G110900;Potri.013G034900;Potri.008G170300;Potri.010G096000;Potri.002G256400;Potri.012G024700;Potri.008G118600;Potri.011G126300;Potri.001G150800;Potri.010G034400;Potri.005G197700;Potri.019G071900;Potri.001G288600
X	Mobilome: prophages, transposons	0	--

## Sheet: 0 h vs_24 h.COG.classf
#ID	Class_Name	Numbers	Genes
J	Translation, ribosomal structure and biogenesis	13	Potri.019G040100;Potri.011G169700;Potri.002G185100;Potri.014G048500;Potri.008G113600;Potri.T033700;Potri.001G016200;Potri.003G008300;Potri.005G070700;Potri.002G052000;Potri.005G054600;Potri.003G007700;Potri.005G049300
A	RNA processing and modification	75	Potri.007G044300;Potri.T148200;Potri.011G071100;Potri.T120000;Potri.T120000;Potri.T074500;Potri.009G047700;Potri.016G034800;Potri.016G034800;Potri.016G034800;Potri.016G034800;Potri.001G152600;Potri.005G102600;Potri.008G149200;Potri.006G036300;Potri.006G036300;Potri.006G036300;Potri.006G036300;Potri.009G102700;Potri.018G068400;Potri.006G096900;Potri.007G059300;Potri.007G059300;Potri.007G059300;Pot…
K	Transcription	36	Potri.013G036900;Potri.007G050300;Potri.001G202100;Potri.013G037000;Potri.002G063300;Potri.006G051700;Potri.012G124100;Potri.019G005300;Potri.016G144100;Potri.007G139200;Potri.T013900;Potri.013G142200;Potri.003G161300;Potri.019G093000;Potri.006G245600;Potri.002G070900;Potri.006G104300;Potri.019G103500;Potri.015G022100;Potri.013G122900;Potri.013G122000;Potri.004G148400;Potri.T119100;Potri.016G1263…
L	Replication, recombination and repair	18	Potri.008G112300;Potri.T074500;Potri.010G137300;Potri.010G182500;Potri.010G056500;Potri.018G071600;Potri.001G366700;Potri.014G041700;Potri.001G379000;Potri.001G099100;Potri.009G058900;Potri.006G277500;Potri.006G135200;Potri.012G114100;Potri.004G175800;Potri.016G098500;Potri.001G264000;Potri.010G081500
B	Chromatin structure and dynamics	4	Potri.005G102600;Potri.007G095200;Potri.018G025500;Potri.001G115600
D	Cell cycle control, cell division, chromosome partitioning	17	Potri.007G044300;Potri.T120000;Potri.T074500;Potri.001G152600;Potri.003G108400;Potri.008G149200;Potri.006G173500;Potri.015G074200;Potri.017G057800;Potri.011G122400;Potri.012G078900;Potri.T076300;Potri.012G005900;Potri.002G236700;Potri.005G138400;Potri.006G089800;Potri.002G001600
Y	Nuclear structure	0	--
V	Defense mechanisms	17	Potri.007G104800;Potri.016G065900;Potri.003G198400;Potri.005G102800;Potri.010G213400;Potri.001G114300;Potri.012G033500;Potri.011G112100;Potri.001G393300;Potri.009G122600;Potri.008G047900;Potri.002G102100;Potri.012G033400;Potri.005G064300;Potri.001G058900;Potri.010G055200;Potri.014G180100
T	Signal transduction mechanisms	52	Potri.001G138800;Potri.001G027000;Potri.012G002700;Potri.010G027100;Potri.009G070100;Potri.018G123700;Potri.018G041000;Potri.011G016200;Potri.019G048800;Potri.008G121900;Potri.008G195800;Potri.013G133900;Potri.002G206100;Potri.006G249900;Potri.002G087600;Potri.014G080200;Potri.011G067500;Potri.006G053000;Potri.004G066300;Potri.015G111300;Potri.009G111500;Potri.001G092100;Potri.009G051300;Potri.01…
M	Cell wall/membrane/envelope biogenesis	77	Potri.001G237200;Potri.006G190700;Potri.001G394400;Potri.005G033500;Potri.001G416800;Potri.011G156100;Potri.T021600;Potri.002G132900;Potri.005G061600;Potri.007G139000;Potri.011G071100;Potri.014G040300;Potri.T074500;Potri.006G228400;Potri.016G034800;Potri.016G034800;Potri.014G029900;Potri.019G078300;Potri.013G008200;Potri.006G036300;Potri.006G036300;Potri.005G257500;Potri.009G102700;Potri.007G1270…
N	Cell motility	23	Potri.001G394400;Potri.T120000;Potri.T120000;Potri.T074500;Potri.T074500;Potri.008G149200;Potri.018G103900;Potri.002G257900;Potri.006G181900;Potri.002G200300;Potri.011G122400;Potri.014G125100;Potri.004G059600;Potri.T076300;Potri.002G227300;Potri.012G005900;Potri.002G236700;Potri.008G026400;Potri.014G155300;Potri.011G069600;Potri.006G089800;Potri.002G001600;Potri.006G004300
Z	Cytoskeleton	1	Potri.016G045500
W	Extracellular structures	0	--
U	Intracellular trafficking, secretion, and vesicular transport	2	Potri.018G025500;Potri.001G115600
O	Posttranslational modification, protein turnover, chaperones	45	Potri.015G087400;Potri.001G467100;Potri.018G076600;Potri.010G113400;Potri.018G140600;Potri.011G076700;Potri.015G087500;Potri.T178900;Potri.004G187400;Potri.009G131800;Potri.001G416500;Potri.006G055400;Potri.010G206800;Potri.009G148000;Potri.005G020300;Potri.014G074500;Potri.001G254500;Potri.009G049600;Potri.010G188200;Potri.T035300;Potri.006G133100;Potri.014G141500;Potri.019G130500;Potri.005G1868…
C	Energy production and conversion	76	Potri.016G031100;Potri.T148200;Potri.001G462800;Potri.011G071100;Potri.005G092200;Potri.014G020500;Potri.002G121200;Potri.016G034800;Potri.016G044100;Potri.011G158500;Potri.009G033900;Potri.005G102600;Potri.009G064800;Potri.009G043700;Potri.003G006000;Potri.006G036300;Potri.009G102700;Potri.017G099000;Potri.018G068400;Potri.006G096900;Potri.011G161500;Potri.007G059300;Potri.005G250700;Potri.019G1…
G	Carbohydrate transport and metabolism	97	Potri.007G015500;Potri.009G006600;Potri.007G050300;Potri.001G436200;Potri.018G126400;Potri.010G191900;Potri.007G140500;Potri.002G069000;Potri.012G126100;Potri.008G010600;Potri.016G028900;Potri.003G175900;Potri.008G108100;Potri.012G002500;Potri.014G122200;Potri.015G029400;Potri.006G128000;Potri.008G100500;Potri.014G054800;Potri.003G112600;Potri.008G050700;Potri.004G162400;Potri.T101200;Potri.008G0…
E	Amino acid transport and metabolism	26	Potri.001G111600;Potri.T107000;Potri.001G099400;Potri.006G272800;Potri.008G172500;Potri.014G179400;Potri.010G224100;Potri.009G151300;Potri.001G084000;Potri.013G124900;Potri.008G017100;Potri.008G187400;Potri.012G070000;Potri.014G157500;Potri.001G027100;Potri.010G126300;Potri.014G135500;Potri.003G111500;Potri.001G145200;Potri.006G106800;Potri.010G241000;Potri.005G073300;Potri.010G034700;Potri.014G0…
F	Nucleotide transport and metabolism	29	Potri.001G394400;Potri.007G044300;Potri.011G071100;Potri.009G086800;Potri.010G180400;Potri.001G152600;Potri.009G102700;Potri.006G096900;Potri.019G124300;Potri.001G401300;Potri.010G183600;Potri.016G112100;Potri.013G100800;Potri.008G094700;Potri.006G097100;Potri.010G193100;Potri.006G097000;Potri.009G156800;Potri.011G120300;Potri.005G138400;Potri.015G093200;Potri.015G096400;Potri.018G113400;Potri.00…
H	Coenzyme transport and metabolism	22	Potri.001G249200;Potri.006G060400;Potri.013G120800;Potri.T074500;Potri.T074500;Potri.004G020500;Potri.006G042200;Potri.001G234900;Potri.006G051100;Potri.014G106500;Potri.013G121400;Potri.017G057800;Potri.017G057800;Potri.016G116400;Potri.T076300;Potri.002G185300;Potri.019G093200;Potri.011G025200;Potri.017G050400;Potri.008G159400;Potri.010G089300;Potri.002G180600
I	Lipid transport and metabolism	52	Potri.015G099600;Potri.T120000;Potri.T120000;Potri.007G089500;Potri.016G034800;Potri.016G034800;Potri.002G213100;Potri.006G036300;Potri.006G036300;Potri.T102600;Potri.004G143200;Potri.001G424700;Potri.007G002100;Potri.002G056800;Potri.007G059300;Potri.007G059300;Potri.005G250700;Potri.005G250700;Potri.009G169900;Potri.001G083400;Potri.018G148800;Potri.009G104000;Potri.012G070000;Potri.011G064400;…
P	Inorganic ion transport and metabolism	114	Potri.017G130100;Potri.005G100400;Potri.016G031100;Potri.T148200;Potri.006G166800;Potri.002G083200;Potri.011G064100;Potri.011G071100;Potri.009G008600;Potri.005G092200;Potri.001G463900;Potri.014G020500;Potri.002G121200;Potri.009G143500;Potri.016G034800;Potri.016G034800;Potri.009G033900;Potri.005G213500;Potri.001G251200;Potri.009G064800;Potri.010G111700;Potri.009G010200;Potri.009G043700;Potri.006G0…
Q	Secondary metabolites biosynthesis, transport and catabolism	32	Potri.011G150100;Potri.002G078600;Potri.004G022800;Potri.005G182700;Potri.011G112400;Potri.009G144900;Potri.002G260300;Potri.003G062400;Potri.001G176500;Potri.013G045000;Potri.012G049500;Potri.007G139600;Potri.002G151300;Potri.010G089000;Potri.010G023600;Potri.009G107400;Potri.006G090600;Potri.011G150200;Potri.016G126500;Potri.001G171600;Potri.013G015100;Potri.006G101100;Potri.001G066000;Potri.00…
R	General function prediction only	72	Potri.008G012400;Potri.008G198100;Potri.005G033400;Potri.007G091200;Potri.007G050300;Potri.008G135200;Potri.019G123200;Potri.014G098800;Potri.T120000;Potri.011G163500;Potri.010G244900;Potri.019G121300;Potri.013G102200;Potri.001G320800;Potri.015G129400;Potri.009G141500;Potri.016G088700;Potri.001G265300;Potri.019G008400;Potri.005G141300;Potri.013G151400;Potri.003G134300;Potri.012G127900;Potri.003G1…
S	Function unknown	21	Potri.008G044300;Potri.T120000;Potri.004G086700;Potri.013G099600;Potri.007G102800;Potri.006G025200;Potri.019G129900;Potri.006G278000;Potri.T093600;Potri.013G034900;Potri.008G170300;Potri.010G096000;Potri.005G002100;Potri.002G256400;Potri.002G027000;Potri.006G258900;Potri.008G118600;Potri.011G126300;Potri.005G197700;Potri.005G235500;Potri.019G071900
X	Mobilome: prophages, transposons	0	--

## Sheet: 0 h vs_48 h.COG.classf
#ID	Class_Name	Numbers	Genes
J	Translation, ribosomal structure and biogenesis	8	Potri.005G024600;Potri.018G022300;Potri.011G169700;Potri.009G131700;Potri.011G004000;Potri.010G030500;Potri.005G054600;Potri.003G038400
A	RNA processing and modification	56	Potri.T148200;Potri.004G010100;Potri.011G071100;Potri.T120000;Potri.T120000;Potri.015G104500;Potri.001G097600;Potri.001G097600;Potri.001G097600;Potri.001G097600;Potri.016G034800;Potri.016G034800;Potri.016G034800;Potri.016G034800;Potri.008G149200;Potri.009G102700;Potri.018G068400;Potri.006G096900;Potri.004G080900;Potri.010G183600;Potri.007G024400;Potri.009G117000;Potri.006G097100;Potri.004G012100;…
K	Transcription	43	Potri.009G109500;Potri.013G036900;Potri.T032600;Potri.004G001000;Potri.001G202100;Potri.013G037000;Potri.002G233600;Potri.002G063300;Potri.013G122500;Potri.006G051700;Potri.007G016700;Potri.002G074700;Potri.003G207000;Potri.016G049400;Potri.003G161300;Potri.006G245600;Potri.017G152500;Potri.007G001000;Potri.006G104300;Potri.019G103500;Potri.015G022100;Potri.017G115900;Potri.013G122900;Potri.005G1…
L	Replication, recombination and repair	17	Potri.008G112300;Potri.010G137300;Potri.014G041700;Potri.001G099100;Potri.014G121000;Potri.009G058900;Potri.014G073600;Potri.001G070500;Potri.001G074000;Potri.009G121500;Potri.018G112800;Potri.016G134000;Potri.004G175800;Potri.010G185900;Potri.004G131600;Potri.001G264000;Potri.010G081500
B	Chromatin structure and dynamics	4	Potri.001G147300;Potri.012G102200;Potri.005G134500;Potri.004G052500
D	Cell cycle control, cell division, chromosome partitioning	11	Potri.T120000;Potri.008G149200;Potri.005G176100;Potri.004G012100;Potri.012G078900;Potri.006G082700;Potri.016G031400;Potri.014G154200;Potri.005G138400;Potri.T104400;Potri.006G089800
Y	Nuclear structure	0	--
V	Defense mechanisms	12	Potri.001G069200;Potri.010G213400;Potri.012G133500;Potri.015G135600;Potri.011G112100;Potri.001G354900;Potri.014G113100;Potri.001G393300;Potri.003G182600;Potri.008G047900;Potri.011G002500;Potri.001G058900
T	Signal transduction mechanisms	48	Potri.T128700;Potri.001G027000;Potri.012G090500;Potri.001G097600;Potri.001G411700;Potri.009G070100;Potri.018G041000;Potri.008G121900;Potri.008G195800;Potri.010G153800;Potri.017G135000;Potri.002G206100;Potri.001G271700;Potri.006G249900;Potri.018G041900;Potri.001G098300;Potri.006G062700;Potri.013G046100;Potri.014G080200;Potri.017G030100;Potri.005G176100;Potri.001G092100;Potri.003G046500;Potri.002G2…
M	Cell wall/membrane/envelope biogenesis	64	Potri.010G041400;Potri.018G098200;Potri.001G140700;Potri.006G063300;Potri.001G416800;Potri.004G010100;Potri.005G061600;Potri.011G071100;Potri.016G034800;Potri.016G034800;Potri.019G078300;Potri.008G130000;Potri.005G257500;Potri.009G102700;Potri.001G007000;Potri.014G024400;Potri.007G127000;Potri.006G096900;Potri.003G162000;Potri.005G176100;Potri.001G068100;Potri.004G118600;Potri.010G183600;Potri.01…
N	Cell motility	15	Potri.T120000;Potri.T120000;Potri.008G149200;Potri.018G103900;Potri.002G257900;Potri.006G181900;Potri.002G200300;Potri.014G125100;Potri.004G059600;Potri.002G227300;Potri.008G026400;Potri.014G155300;Potri.011G069600;Potri.006G089800;Potri.006G004300
Z	Cytoskeleton	1	Potri.016G045500
W	Extracellular structures	0	--
U	Intracellular trafficking, secretion, and vesicular transport	2	Potri.012G102200;Potri.002G248900
O	Posttranslational modification, protein turnover, chaperones	39	Potri.011G076700;Potri.008G214800;Potri.001G437400;Potri.015G087500;Potri.T178900;Potri.009G131800;Potri.010G143100;Potri.014G133700;Potri.001G163600;Potri.010G061400;Potri.003G143600;Potri.001G416500;Potri.005G113100;Potri.001G087500;Potri.012G131500;Potri.012G022400;Potri.001G241300;Potri.004G172300;Potri.001G254500;Potri.009G049600;Potri.011G146300;Potri.007G045100;Potri.006G001300;Potri.018G1…
C	Energy production and conversion	74	Potri.T148200;Potri.004G010100;Potri.011G071100;Potri.005G092200;Potri.005G084500;Potri.016G034800;Potri.016G044100;Potri.009G033900;Potri.007G085000;Potri.005G029600;Potri.009G043700;Potri.003G006000;Potri.015G092000;Potri.009G102700;Potri.001G270300;Potri.017G099000;Potri.018G068400;Potri.006G094700;Potri.011G044600;Potri.006G096900;Potri.004G080900;Potri.004G080900;Potri.003G146800;Potri.005G0…
G	Carbohydrate transport and metabolism	88	Potri.011G010400;Potri.016G054800;Potri.001G436200;Potri.018G126400;Potri.006G094400;Potri.001G015100;Potri.002G162400;Potri.007G140500;Potri.015G027800;Potri.002G069000;Potri.003G175900;Potri.012G002500;Potri.001G083200;Potri.015G029400;Potri.006G015300;Potri.006G128000;Potri.016G113300;Potri.006G171100;Potri.014G054800;Potri.016G098600;Potri.003G112600;Potri.016G011000;Potri.008G050700;Potri.01…
E	Amino acid transport and metabolism	28	Potri.001G111600;Potri.002G014000;Potri.011G122100;Potri.006G272800;Potri.003G190600;Potri.004G106400;Potri.009G151300;Potri.001G084000;Potri.005G162800;Potri.013G124900;Potri.008G017100;Potri.008G196800;Potri.012G070000;Potri.014G157500;Potri.001G027100;Potri.010G126300;Potri.008G000300;Potri.003G111500;Potri.003G212900;Potri.003G187200;Potri.001G145200;Potri.009G072900;Potri.010G241000;Potri.01…
F	Nucleotide transport and metabolism	30	Potri.004G010100;Potri.011G071100;Potri.009G086800;Potri.009G102700;Potri.006G096900;Potri.010G183600;Potri.001G318500;Potri.017G063900;Potri.005G223500;Potri.013G100800;Potri.008G094700;Potri.006G097100;Potri.004G012100;Potri.010G193100;Potri.006G097000;Potri.014G154200;Potri.005G200700;Potri.013G101000;Potri.002G005500;Potri.T079700;Potri.011G120300;Potri.005G138400;Potri.016G133800;Potri.005G2…
H	Coenzyme transport and metabolism	13	Potri.001G249200;Potri.004G020500;Potri.010G153500;Potri.001G234900;Potri.012G047300;Potri.013G121400;Potri.002G185300;Potri.010G113500;Potri.011G025200;Potri.017G050400;Potri.014G110800;Potri.010G089300;Potri.012G001500
I	Lipid transport and metabolism	30	Potri.015G099600;Potri.003G147400;Potri.T120000;Potri.T120000;Potri.016G034800;Potri.016G034800;Potri.007G002100;Potri.001G083400;Potri.012G070000;Potri.007G021300;Potri.012G102200;Potri.012G102200;Potri.006G198800;Potri.002G165800;Potri.004G142900;Potri.017G063500;Potri.007G089000;Potri.001G177900;Potri.019G092600;Potri.003G218000;Potri.001G153100;Potri.001G325200;Potri.017G112800;Potri.017G1128…
P	Inorganic ion transport and metabolism	113	Potri.005G112200;Potri.005G100400;Potri.T148200;Potri.004G010100;Potri.011G071100;Potri.005G092200;Potri.005G084500;Potri.001G097600;Potri.009G143500;Potri.016G034800;Potri.016G034800;Potri.009G033900;Potri.007G085000;Potri.005G029600;Potri.010G111700;Potri.009G010200;Potri.009G043700;Potri.003G006000;Potri.008G149200;Potri.016G124700;Potri.008G076600;Potri.009G102700;Potri.001G270300;Potri.017G0…
Q	Secondary metabolites biosynthesis, transport and catabolism	26	Potri.002G078600;Potri.004G022800;Potri.005G182700;Potri.005G184400;Potri.006G151600;Potri.001G176500;Potri.001G113100;Potri.009G145000;Potri.007G139600;Potri.008G160000;Potri.001G278200;Potri.005G175200;Potri.003G163800;Potri.014G145100;Potri.009G107700;Potri.010G089000;Potri.004G146000;Potri.002G040700;Potri.016G126500;Potri.001G171600;Potri.006G101100;Potri.005G184200;Potri.006G239300;Potri.00…
R	General function prediction only	49	Potri.008G012400;Potri.001G389800;Potri.007G091200;Potri.008G135200;Potri.019G123200;Potri.T120000;Potri.T037100;Potri.010G244900;Potri.001G320800;Potri.015G129400;Potri.009G141500;Potri.002G209900;Potri.001G056300;Potri.009G136700;Potri.004G080900;Potri.005G141300;Potri.003G201900;Potri.012G127900;Potri.003G161300;Potri.007G052600;Potri.019G103500;Potri.006G129200;Potri.012G123900;Potri.014G0518…
S	Function unknown	21	Potri.008G044300;Potri.T120000;Potri.004G086700;Potri.019G129900;Potri.006G278000;Potri.001G318500;Potri.T093600;Potri.005G223500;Potri.004G012100;Potri.010G096000;Potri.009G147100;Potri.005G002100;Potri.014G154200;Potri.004G069300;Potri.002G005500;Potri.006G258900;Potri.008G118600;Potri.011G126300;Potri.005G256100;Potri.T104400;Potri.001G288600
X	Mobilome: prophages, transposons	0	--

## Sheet: 0 h vs_72 h.COG.classf
#ID	Class_Name	Numbers	Genes
J	Translation, ribosomal structure and biogenesis	2	Potri.008G044700;Potri.009G066100
A	RNA processing and modification	36	Potri.T148200;Potri.011G071100;Potri.001G162600;Potri.016G034800;Potri.016G034800;Potri.016G034800;Potri.016G034800;Potri.008G149200;Potri.T079500;Potri.006G036300;Potri.006G036300;Potri.006G036300;Potri.006G036300;Potri.006G096900;Potri.017G057800;Potri.014G127000;Potri.006G097100;Potri.010G193100;Potri.006G097000;Potri.005G200500;Potri.001G105900;Potri.001G105900;Potri.001G105900;Potri.001G1059…
K	Transcription	18	Potri.007G050300;Potri.001G202100;Potri.001G003200;Potri.006G235500;Potri.003G150000;Potri.002G226700;Potri.019G103500;Potri.015G022100;Potri.006G235800;Potri.009G081800;Potri.017G133600;Potri.001G437700;Potri.004G231900;Potri.009G092900;Potri.019G093100;Potri.003G046400;Potri.002G258500;Potri.001G069000
L	Replication, recombination and repair	4	Potri.008G112300;Potri.010G137300;Potri.014G041700;Potri.006G277500
B	Chromatin structure and dynamics	1	Potri.001G147300
D	Cell cycle control, cell division, chromosome partitioning	5	Potri.008G149200;Potri.015G074200;Potri.017G057800;Potri.006G082700;Potri.006G089800
Y	Nuclear structure	0	--
V	Defense mechanisms	7	Potri.008G164400;Potri.016G065900;Potri.010G074300;Potri.008G047900;Potri.012G069800;Potri.012G069700;Potri.001G058900
T	Signal transduction mechanisms	33	Potri.005G259900;Potri.001G027000;Potri.007G110600;Potri.012G090500;Potri.009G167400;Potri.001G278500;Potri.018G071400;Potri.017G135000;Potri.013G133900;Potri.002G206100;Potri.006G249900;Potri.010G187000;Potri.011G039200;Potri.001G092100;Potri.003G046500;Potri.016G069400;Potri.006G082700;Potri.004G089400;Potri.015G093800;Potri.T146500;Potri.019G120000;Potri.006G112500;Potri.005G069400;Potri.001G2…
M	Cell wall/membrane/envelope biogenesis	38	Potri.018G098200;Potri.001G416800;Potri.005G061600;Potri.011G071100;Potri.015G029100;Potri.016G034800;Potri.016G034800;Potri.019G078300;Potri.T079500;Potri.006G036300;Potri.006G036300;Potri.005G257500;Potri.007G127000;Potri.006G096900;Potri.007G031700;Potri.016G142800;Potri.010G150400;Potri.001G318500;Potri.005G223500;Potri.010G221400;Potri.006G097100;Potri.010G193100;Potri.006G082700;Potri.006G0…
N	Cell motility	11	Potri.008G149200;Potri.002G257900;Potri.006G181900;Potri.014G125100;Potri.002G227300;Potri.008G026400;Potri.010G085600;Potri.014G155300;Potri.011G069600;Potri.010G234100;Potri.006G089800
Z	Cytoskeleton	0	--
W	Extracellular structures	0	--
U	Intracellular trafficking, secretion, and vesicular transport	1	Potri.002G248900
O	Posttranslational modification, protein turnover, chaperones	17	Potri.010G059600;Potri.011G076700;Potri.008G214800;Potri.006G024200;Potri.010G060100;Potri.010G060300;Potri.008G174900;Potri.001G241300;Potri.001G254500;Potri.014G141500;Potri.010G059400;Potri.015G064800;Potri.011G114000;Potri.012G082800;Potri.019G098600;Potri.002G017200;Potri.008G214600
C	Energy production and conversion	43	Potri.T148200;Potri.011G071100;Potri.001G162600;Potri.016G034800;Potri.009G033900;Potri.007G085000;Potri.T079500;Potri.006G036300;Potri.001G424300;Potri.017G099000;Potri.006G096900;Potri.018G146100;Potri.001G270500;Potri.004G018800;Potri.014G127000;Potri.001G270400;Potri.010G246800;Potri.006G097100;Potri.010G193100;Potri.002G126100;Potri.018G149300;Potri.006G097000;Potri.005G200500;Potri.001G1059…
G	Carbohydrate transport and metabolism	55	Potri.014G111800;Potri.013G152400;Potri.008G179300;Potri.001G281900;Potri.007G050300;Potri.018G126400;Potri.T177800;Potri.001G227300;Potri.017G052100;Potri.002G069000;Potri.009G083800;Potri.005G223600;Potri.008G108100;Potri.001G227400;Potri.009G060400;Potri.002G060500;Potri.004G129700;Potri.014G178100;Potri.007G141900;Potri.001G348100;Potri.002G098400;Potri.014G140300;Potri.016G002300;Potri.019G0…
E	Amino acid transport and metabolism	14	Potri.002G014000;Potri.001G099400;Potri.006G272800;Potri.008G172500;Potri.004G037800;Potri.014G179400;Potri.008G141100;Potri.008G196800;Potri.019G067500;Potri.003G187000;Potri.001G027100;Potri.004G075200;Potri.017G014200;Potri.001G144800
F	Nucleotide transport and metabolism	22	Potri.013G080400;Potri.019G031200;Potri.011G071100;Potri.T079500;Potri.013G080500;Potri.006G096900;Potri.013G080300;Potri.001G318500;Potri.005G223500;Potri.013G100800;Potri.006G097100;Potri.010G193100;Potri.013G082600;Potri.006G097000;Potri.005G200500;Potri.013G101000;Potri.002G005500;Potri.013G082800;Potri.T079700;Potri.005G256100;Potri.006G087100;Potri.007G088300
H	Coenzyme transport and metabolism	4	Potri.017G057800;Potri.017G057800;Potri.003G103900;Potri.012G001500
I	Lipid transport and metabolism	16	Potri.016G034800;Potri.016G034800;Potri.001G012500;Potri.006G036300;Potri.006G036300;Potri.006G144400;Potri.007G021300;Potri.006G198800;Potri.006G253900;Potri.004G208500;Potri.004G142900;Potri.001G105900;Potri.001G105900;Potri.001G032400;Potri.010G127600;Potri.001G061100
P	Inorganic ion transport and metabolism	69	Potri.T148200;Potri.006G166800;Potri.019G024600;Potri.011G071100;Potri.009G143500;Potri.001G162600;Potri.016G034800;Potri.016G034800;Potri.009G033900;Potri.007G085000;Potri.009G010200;Potri.008G149200;Potri.013G115900;Potri.T079500;Potri.006G036300;Potri.006G036300;Potri.001G424300;Potri.018G063900;Potri.008G076600;Potri.006G158900;Potri.017G099000;Potri.006G096900;Potri.011G062000;Potri.018G1461…
Q	Secondary metabolites biosynthesis, transport and catabolism	18	Potri.011G150100;Potri.004G139700;Potri.005G182700;Potri.006G151600;Potri.001G176500;Potri.012G049500;Potri.001G278200;Potri.005G175200;Potri.010G089000;Potri.009G107400;Potri.016G126500;Potri.001G171600;Potri.008G120300;Potri.007G015100;Potri.005G117000;Potri.004G185000;Potri.016G102100;Potri.001G448000
R	General function prediction only	21	Potri.T096100;Potri.007G091200;Potri.007G050300;Potri.013G125000;Potri.017G133700;Potri.001G465400;Potri.015G129400;Potri.009G141500;Potri.010G046900;Potri.012G127900;Potri.013G103800;Potri.019G103500;Potri.017G052600;Potri.009G092900;Potri.009G060300;Potri.005G248900;Potri.014G098600;Potri.008G186000;Potri.013G014200;Potri.001G069000;Potri.007G056500
S	Function unknown	13	Potri.008G044300;Potri.T131500;Potri.018G061900;Potri.001G318500;Potri.005G223500;Potri.014G039000;Potri.010G096000;Potri.005G002100;Potri.016G004800;Potri.002G005500;Potri.011G126300;Potri.005G256100;Potri.014G106600
X	Mobilome: prophages, transposons	0	--
