# Supplementary material for: High temperature increased lignin contents of poplar (Populus spp) stem via inducing the synthesis caffeate and coniferaldehyde
Source: Front Genet. 2022 Sep 9;13:1007513. doi: 10.3389/fgene.2022.1007513 (PMC9500204; doi:10.3389/fgene.2022.1007513)
Supplement: Supplementary file 8 [file Table7.XLSX]

## Sheet: 0 h vs_6 h.GO_enrichm
#GO_classify1	GO_classify2	All	DE
#Total_gene		30541	5400
cellular component	extracellular region	3336	820
cellular component	cell	25281	4602
cellular component	nucleoid	73	5
cellular component	membrane	13103	2316
cellular component	virion	4	1
cellular component	cell junction	3826	772
cellular component	membrane-enclosed lumen	2312	387
cellular component	macromolecular complex	3884	560
cellular component	organelle	21057	3826
cellular component	extracellular region part	263	57
cellular component	organelle part	9347	1557
cellular component	virion part	4	1
cellular component	membrane part	4449	840
cellular component	cell part	25281	4602
cellular component	symplast	3822	771
cellular component	supramolecular complex	315	105
molecular function	transcription factor activity, protein binding	150	25
molecular function	nucleic acid binding transcription factor activity	2110	453
molecular function	catalytic activity	15986	2946
molecular function	signal transducer activity	1154	149
molecular function	structural molecule activity	792	78
molecular function	transporter activity	2255	374
molecular function	binding	18180	3154
molecular function	electron carrier activity	764	170
molecular function	antioxidant activity	261	60
molecular function	metallochaperone activity	20	5
molecular function	protein tag	4	0
molecular function	translation regulator activity	17	1
molecular function	nutrient reservoir activity	135	19
molecular function	molecular transducer activity	716	97
molecular function	molecular function regulator	468	112
biological process	reproduction	8899	1788
biological process	cell killing	14	5
biological process	immune system process	4279	756
biological process	behavior	2	1
biological process	metabolic process	22548	4147
biological process	cellular process	24293	4462
biological process	reproductive process	8802	1770
biological process	biological adhesion	256	43
biological process	signaling	7199	1318
biological process	multicellular organismal process	13350	2663
biological process	developmental process	13620	2753
biological process	growth	4103	891
biological process	locomotion	133	33
biological process	single-organism process	22877	4337
biological process	biological phase	55	4
biological process	rhythmic process	485	79
biological process	response to stimulus	18613	3628
biological process	localization	10358	1887
biological process	multi-organism process	8396	1624
biological process	biological regulation	15800	3048
biological process	cellular component organization or biogenesis	11912	2386
biological process	detoxification	823	178

## Sheet: 0 h vs_12 h.GO_enrichm
#GO_classify1	GO_classify2	All	DE
#Total_gene		30541	2141
cellular component	extracellular region	3336	400
cellular component	cell	25281	1848
cellular component	nucleoid	73	5
cellular component	membrane	13103	968
cellular component	virion	4	1
cellular component	cell junction	3826	283
cellular component	membrane-enclosed lumen	2312	109
cellular component	macromolecular complex	3884	186
cellular component	organelle	21057	1553
cellular component	extracellular region part	263	25
cellular component	organelle part	9347	649
cellular component	virion part	4	1
cellular component	membrane part	4449	355
cellular component	cell part	25281	1848
cellular component	symplast	3822	283
cellular component	supramolecular complex	315	57
molecular function	transcription factor activity, protein binding	150	14
molecular function	nucleic acid binding transcription factor activity	2110	193
molecular function	catalytic activity	15986	1188
molecular function	signal transducer activity	1154	62
molecular function	structural molecule activity	792	21
molecular function	transporter activity	2255	163
molecular function	binding	18180	1235
molecular function	electron carrier activity	764	87
molecular function	antioxidant activity	261	36
molecular function	metallochaperone activity	20	0
molecular function	protein tag	4	0
molecular function	translation regulator activity	17	0
molecular function	nutrient reservoir activity	135	11
molecular function	molecular transducer activity	716	30
molecular function	molecular function regulator	468	67
biological process	reproduction	8899	697
biological process	cell killing	14	4
biological process	immune system process	4279	292
biological process	behavior	2	0
biological process	metabolic process	22548	1676
biological process	cellular process	24293	1821
biological process	reproductive process	8802	690
biological process	biological adhesion	256	13
biological process	signaling	7199	537
biological process	multicellular organismal process	13350	1056
biological process	developmental process	13620	1108
biological process	growth	4103	331
biological process	locomotion	133	14
biological process	single-organism process	22877	1781
biological process	biological phase	55	2
biological process	rhythmic process	485	48
biological process	response to stimulus	18613	1464
biological process	localization	10358	802
biological process	multi-organism process	8396	673
biological process	biological regulation	15800	1254
biological process	cellular component organization or biogenesis	11912	1027
biological process	detoxification	823	82

## Sheet: 0 h vs_24 h.GO_enrichm
#GO_classify1	GO_classify2	All	DE
#Total_gene		30541	1519
cellular component	extracellular region	3336	297
cellular component	cell	25281	1331
cellular component	nucleoid	73	1
cellular component	membrane	13103	699
cellular component	virion	4	1
cellular component	cell junction	3826	217
cellular component	membrane-enclosed lumen	2312	71
cellular component	macromolecular complex	3884	142
cellular component	organelle	21057	1120
cellular component	extracellular region part	263	19
cellular component	organelle part	9347	453
cellular component	virion part	4	1
cellular component	membrane part	4449	274
cellular component	cell part	25281	1331
cellular component	symplast	3822	217
cellular component	supramolecular complex	315	56
molecular function	transcription factor activity, protein binding	150	8
molecular function	nucleic acid binding transcription factor activity	2110	147
molecular function	catalytic activity	15986	849
molecular function	signal transducer activity	1154	40
molecular function	structural molecule activity	792	19
molecular function	transporter activity	2255	122
molecular function	binding	18180	888
molecular function	electron carrier activity	764	57
molecular function	antioxidant activity	261	29
molecular function	metallochaperone activity	20	0
molecular function	protein tag	4	0
molecular function	translation regulator activity	17	0
molecular function	nutrient reservoir activity	135	11
molecular function	molecular transducer activity	716	18
molecular function	molecular function regulator	468	42
biological process	reproduction	8899	521
biological process	cell killing	14	5
biological process	immune system process	4279	204
biological process	behavior	2	0
biological process	metabolic process	22548	1225
biological process	cellular process	24293	1306
biological process	reproductive process	8802	515
biological process	biological adhesion	256	10
biological process	signaling	7199	366
biological process	multicellular organismal process	13350	781
biological process	developmental process	13620	816
biological process	growth	4103	249
biological process	locomotion	133	7
biological process	single-organism process	22877	1288
biological process	biological phase	55	2
biological process	rhythmic process	485	33
biological process	response to stimulus	18613	1037
biological process	localization	10358	569
biological process	multi-organism process	8396	479
biological process	biological regulation	15800	889
biological process	cellular component organization or biogenesis	11912	753
biological process	detoxification	823	66

## Sheet: 0 h vs_48 h.GO_enrichm
#GO_classify1	GO_classify2	All	DE
#Total_gene		30541	1343
cellular component	extracellular region	3336	273
cellular component	cell	25281	1143
cellular component	nucleoid	73	0
cellular component	membrane	13103	603
cellular component	virion	4	0
cellular component	cell junction	3826	214
cellular component	membrane-enclosed lumen	2312	65
cellular component	macromolecular complex	3884	120
cellular component	organelle	21057	954
cellular component	extracellular region part	263	14
cellular component	organelle part	9347	354
cellular component	virion part	4	0
cellular component	membrane part	4449	241
cellular component	cell part	25281	1143
cellular component	symplast	3822	214
cellular component	supramolecular complex	315	37
molecular function	transcription factor activity, protein binding	150	3
molecular function	nucleic acid binding transcription factor activity	2110	124
molecular function	catalytic activity	15986	753
molecular function	signal transducer activity	1154	36
molecular function	structural molecule activity	792	15
molecular function	transporter activity	2255	109
molecular function	binding	18180	787
molecular function	electron carrier activity	764	55
molecular function	antioxidant activity	261	22
molecular function	metallochaperone activity	20	1
molecular function	protein tag	4	0
molecular function	translation regulator activity	17	1
molecular function	nutrient reservoir activity	135	5
molecular function	molecular transducer activity	716	21
molecular function	molecular function regulator	468	39
biological process	reproduction	8899	468
biological process	cell killing	14	2
biological process	immune system process	4279	193
biological process	behavior	2	0
biological process	metabolic process	22548	1047
biological process	cellular process	24293	1137
biological process	reproductive process	8802	464
biological process	biological adhesion	256	15
biological process	signaling	7199	341
biological process	multicellular organismal process	13350	715
biological process	developmental process	13620	745
biological process	growth	4103	247
biological process	locomotion	133	4
biological process	single-organism process	22877	1140
biological process	biological phase	55	0
biological process	rhythmic process	485	24
biological process	response to stimulus	18613	932
biological process	localization	10358	516
biological process	multi-organism process	8396	444
biological process	biological regulation	15800	806
biological process	cellular component organization or biogenesis	11912	638
biological process	detoxification	823	52

## Sheet: 0 h vs_72 h.GO_enrichm
#GO_classify1	GO_classify2	All	DE
#Total_gene		30541	774
cellular component	extracellular region	3336	173
cellular component	cell	25281	656
cellular component	nucleoid	73	0
cellular component	membrane	13103	319
cellular component	virion	4	0
cellular component	cell junction	3826	114
cellular component	membrane-enclosed lumen	2312	35
cellular component	macromolecular complex	3884	38
cellular component	organelle	21057	549
cellular component	extracellular region part	263	15
cellular component	organelle part	9347	181
cellular component	virion part	4	0
cellular component	membrane part	4449	114
cellular component	cell part	25281	656
cellular component	symplast	3822	114
cellular component	supramolecular complex	315	12
molecular function	transcription factor activity, protein binding	150	5
molecular function	nucleic acid binding transcription factor activity	2110	106
molecular function	catalytic activity	15986	437
molecular function	signal transducer activity	1154	23
molecular function	structural molecule activity	792	2
molecular function	transporter activity	2255	47
molecular function	binding	18180	461
molecular function	electron carrier activity	764	30
molecular function	antioxidant activity	261	14
molecular function	metallochaperone activity	20	0
molecular function	protein tag	4	0
molecular function	translation regulator activity	17	0
molecular function	nutrient reservoir activity	135	11
molecular function	molecular transducer activity	716	12
molecular function	molecular function regulator	468	12
biological process	reproduction	8899	263
biological process	cell killing	14	2
biological process	immune system process	4279	157
biological process	behavior	2	0
biological process	metabolic process	22548	626
biological process	cellular process	24293	679
biological process	reproductive process	8802	259
biological process	biological adhesion	256	5
biological process	signaling	7199	257
biological process	multicellular organismal process	13350	434
biological process	developmental process	13620	450
biological process	growth	4103	142
biological process	locomotion	133	8
biological process	single-organism process	22877	673
biological process	biological phase	55	0
biological process	rhythmic process	485	7
biological process	response to stimulus	18613	604
biological process	localization	10358	322
biological process	multi-organism process	8396	301
biological process	biological regulation	15800	490
biological process	cellular component organization or biogenesis	11912	347
biological process	detoxification	823	40
