# Supplementary material for: High temperature increased lignin contents of poplar (Populus spp) stem via inducing the synthesis caffeate and coniferaldehyde
Source: Front Genet. 2022 Sep 9;13:1007513. doi: 10.3389/fgene.2022.1007513 (PMC9500204; doi:10.3389/fgene.2022.1007513)
Supplement: Supplementary file 9 [file Table8.XLSX]

## Sheet: 0 h vs_6 h.KEGG_enrichm
#KEGG_n	1173	KEGG_N	6982
#Pathway	ko_ID	DEgene	gene	DEgene_all	gene_all
Starch and sucrose metabolism	ko00500	95	351	1173	6982	Potri.001G015100;Potri.001G162400;Potri.001G162500;Potri.001G162600;Potri.001G206800;Potri.001G222900;Potri.001G225900;Potri.001G226100;Potri.001G237200;Potri.001G254800;Potri.001G346800;Potri.001G354200;Potri.001G359100;Potri.001G359200;Potri.001G383600;Potri.001G403900;Potri.001G416800;Potri.002G146500;Potri.002G200300;Potri.002G202300;Potri.003G001900;Potri.003G002600;Potri.003G002800;Potri.00…	K01188+K01051+K01051+K01051+K15920+K01188+K01188+K01188+K08678+K00844+K01184+K15920+K00700+K00700+K16055+K05350+K20867+K08679+K00770+K00695+K01051+K01051+K01051+K15920+K01051+K16055+K05350+K05350+K00688+K00963+K00695+K00012+K00688+K01179+K01051+K01087+K00975+K01051+K00695+K16055+K01051+K01051+K19893+K00847+K01184+K00975+K00012+K00975+K01179+K16055+K01835+K00012+K01188+K01188+K08678+K01051+K01051+…
Glycerolipid metabolism	ko00561	17	83	1173	6982	Potri.001G167100;Potri.001G177300;Potri.002G133100;Potri.003G063100;Potri.004G038100;Potri.004G190100;Potri.005G097000;Potri.006G063300;Potri.006G097800;Potri.008G058200;Potri.010G201200;Potri.011G145900;Potri.011G164300;Potri.012G041800;Potri.015G074100;Potri.018G123000;Potri.019G056700	K14085+K15918+K13513+K00679+K07407+K00679+K00011+K03715+K13508+K13508+K13508+K14457+K01054+K01054+K00128+K03715+K07407
Phagosome	ko04145	22	120	1173	6982	Potri.001G104600;Potri.001G106100;Potri.001G246900;Potri.001G289500;Potri.001G387600;Potri.002G111900;Potri.003G125400;Potri.003G220300;Potri.005G198800;Potri.005G239900;Potri.009G040200;Potri.009G067100;Potri.011G061500;Potri.013G009500;Potri.013G123800;Potri.014G051800;Potri.016G139800;Potri.017G081000;Potri.018G083400;Potri.019G029200;Potri.019G036000;Potri.019G092300	K07375+K07375+K07375+K07374+K10956+K07374+K07375+K07374+K07897+K07375+K07375+K07375+K04392+K08057+K04392+K04392+K02150+K07374+K04392+K02150+K07374+K04392
Base excision repair	ko03410	15	61	1173	6982	Potri.001G247700;Potri.004G094200;Potri.004G094300;Potri.005G113300;Potri.005G180700;Potri.008G067400;Potri.008G112300;Potri.010G137300;Potri.012G039300;Potri.013G076400;Potri.014G041700;Potri.014G128200;Potri.014G198000;Potri.016G045800;Potri.019G042900	K04802+K10747+K10747+K10772+K03660+K10802+K01246+K01246+K02325+K03505+K01246+K10798+K03575+K02328+K03505
Protein processing in endoplasmic reticulum	ko04141	66	314	1173	6982	Potri.001G042600;Potri.001G042700;Potri.001G087500;Potri.001G117200;Potri.001G192600;Potri.001G215100;Potri.001G238700;Potri.001G254700;Potri.001G304100;Potri.001G387600;Potri.003G071100;Potri.003G076000;Potri.003G109200;Potri.003G157800;Potri.004G073600;Potri.004G187200;Potri.004G187400;Potri.004G233100;Potri.004G233200;Potri.005G127900;Potri.006G034600;Potri.006G073500;Potri.006G088000;Potri.00…	K03283+K03283+K09490+K03347+K13993+K09503+K13993+K13993+K10661+K10956+K13993+K13993+K13993+K07765+K04079+K13993+K13993+K13989+K13989+K10666+K13993+K13993+K09562+K13993+K13989+K13993+K16196+K10575+K10575+K03283+K03283+K03283+K13993+K09487+K03347+K09503+K10666+K13993+K13993+K12670+K12670+K13993+K13993+K03347+K13993+K13993+K13993+K03283+K03283+K03283+K10575+K14009+K10666+K13993+K08057+K09490+K13993+…
Nicotinate and nicotinamide metabolism	ko00760	5	29	1173	6982	Potri.005G032300;Potri.010G088000;Potri.010G113500;Potri.012G089500;Potri.T085900	K06210+K03787+K00767+K03517+K00858
Homologous recombination	ko03440	16	72	1173	6982	Potri.004G141500;Potri.004G159000;Potri.006G135200;Potri.006G167600;Potri.006G172600;Potri.006G212100;Potri.006G275700;Potri.008G073500;Potri.008G189900;Potri.010G183800;Potri.010G239200;Potri.013G076400;Potri.014G189600;Potri.015G057300;Potri.016G045800;Potri.019G042900	K10875+K10875+K04482+K10739+K07466+K10740+K10739+K10875+K07466+K10875+K10740+K03505+K08775+K07466+K02328+K03505
Pentose and glucuronate interconversions	ko00040	51	160	1173	6982	Potri.001G052300;Potri.001G162400;Potri.001G162500;Potri.001G162600;Potri.001G339500;Potri.001G346800;Potri.002G238800;Potri.003G001900;Potri.003G002600;Potri.003G002800;Potri.003G072800;Potri.003G175900;Potri.004G074600;Potri.004G118600;Potri.005G022700;Potri.005G064500;Potri.005G097000;Potri.006G122000;Potri.006G135100;Potri.006G196400;Potri.006G256600;Potri.006G256700;Potri.007G144400;Potri.00…	K01728+K01051+K01051+K01051+K01728+K01184+K01728+K01051+K01051+K01051+K01051+K01728+K00963+K00012+K01051+K01728+K00011+K01728+K01051+K01728+K01051+K01051+K01184+K01728+K00012+K01728+K00012+K01728+K01051+K01051+K01728+K01051+K01213+K01728+K01728+K01051+K01051+K01051+K01728+K00128+K01728+K01051+K01184+K01184+K00012+K01051+K01805+K01051+K01051+K01051+K01051
Glycolysis / Gluconeogenesis	ko00010	38	180	1173	6982	Potri.001G001600;Potri.001G079500;Potri.001G122400;Potri.001G167100;Potri.001G240300;Potri.001G254800;Potri.002G013400;Potri.002G093300;Potri.004G129700;Potri.005G168000;Potri.005G257800;Potri.006G094400;Potri.006G113300;Potri.006G152600;Potri.007G011200;Potri.007G015500;Potri.008G002500;Potri.008G083900;Potri.008G084400;Potri.008G084500;Potri.008G179300;Potri.009G084700;Potri.010G055400;Potri.01…	K00873+K00850+K00016+K14085+K01803+K00844+K00121+K01834+K01785+K01834+K00895+K03841+K15633+K00850+K01610+K01623+K00873+K00134+K00927+K00927+K00134+K00873+K00134+K01835+K00134+K00873+K00895+K00895+K00873+K00627+K00128+K00134+K00927+K01785+K01785+K01623+K00121+K18857
Aminoacyl-tRNA biosynthesis	ko00970	8	76	1173	6982	Potri.002G187000;Potri.002G249700;Potri.004G078900;Potri.008G122900;Potri.010G064700;Potri.011G009600;Potri.014G048500;Potri.T037400	K01881+K01893+K01881+K01883+K02434+K01869+K14164+K01869
Amino sugar and nucleotide sugar metabolism	ko00520	55	203	1173	6982	Potri.001G206800;Potri.001G237200;Potri.001G254800;Potri.001G354200;Potri.001G383300;Potri.001G383500;Potri.001G416800;Potri.002G146500;Potri.002G200300;Potri.003G022900;Potri.003G074700;Potri.003G120000;Potri.003G123700;Potri.004G074600;Potri.004G117800;Potri.004G118600;Potri.004G189900;Potri.005G116200;Potri.005G229700;Potri.006G029900;Potri.006G188300;Potri.007G013900;Potri.007G129700;Potri.00…	K15920+K08678+K00844+K15920+K12450+K12450+K20867+K08679+K00770+K15920+K00972+K12451+K01784+K00963+K13379+K00012+K12449+K01711+K00975+K01209+K01183+K01711+K00847+K00975+K00012+K13379+K00975+K01835+K13379+K00012+K08678+K00326+K12450+K20867+K12448+K10046+K00326+K01183+K01183+K00975+K00770+K08678+K01183+K01183+K01183+K13379+K00326+K00847+K08679+K00012+K13379+K01183+K01183+K01183+K10046
Biosynthesis of unsaturated fatty acids	ko01040	9	42	1173	6982	Potri.001G012500;Potri.001G012700;Potri.002G216400;Potri.006G101800;Potri.006G192000;Potri.007G090400;Potri.010G052400;Potri.013G059000;Potri.019G033600	K10256+K10256+K07513+K00232+K10256+K00232+K10251+K00059+K00059
N-Glycan biosynthesis	ko00510	3	65	1173	6982	Potri.002G170700;Potri.009G112800;Potri.009G112900	K07441+K12670+K12670
Fatty acid degradation	ko00071	10	62	1173	6982	Potri.001G167100;Potri.001G321800;Potri.002G013400;Potri.002G192400;Potri.002G216400;Potri.006G101800;Potri.007G090400;Potri.015G074100;Potri.018G142700;Potri.T107200	K14085+K01897+K00121+K01897+K07513+K00232+K00232+K00128+K00121+K18857
Endocytosis	ko04144	33	242	1173	6982	Potri.001G042600;Potri.001G042700;Potri.001G406300;Potri.001G442500;Potri.002G046200;Potri.003G015000;Potri.003G037700;Potri.003G090800;Potri.003G105200;Potri.004G100900;Potri.005G038900;Potri.005G198800;Potri.006G253900;Potri.007G059800;Potri.008G054000;Potri.008G054600;Potri.008G054700;Potri.008G100000;Potri.008G170800;Potri.008G211100;Potri.010G041200;Potri.010G205500;Potri.010G205700;Potri.01…	K03283+K03283+K12486+K12191+K12183+K01115+K01115+K11826+K11247+K19476+K10396+K07897+K01115+K19476+K03283+K03283+K03283+K07937+K05758+K01115+K11866+K03283+K03283+K03283+K12483+K12486+K12486+K12191+K01528+K01528+K07904+K07904+K07904
Lysine degradation	ko00310	6	40	1173	6982	Potri.001G167100;Potri.002G237900;Potri.002G238000;Potri.005G112500;Potri.014G143900;Potri.015G074100	K14085+K11420+K11420+K18826+K11420+K00128
Arachidonic acid metabolism	ko00590	2	23	1173	6982	Potri.005G242500;Potri.006G070400	K05309+K01047
Limonene and pinene degradation	ko00903	1	10	1173	6982	Potri.015G074100	K00128
Plant hormone signal transduction	ko04075	72	402	1173	6982	Potri.001G016000;Potri.001G027000;Potri.001G057400;Potri.001G060400;Potri.001G069000;Potri.001G142200;Potri.001G142500;Potri.001G177400;Potri.001G177500;Potri.001G288600;Potri.001G410400;Potri.002G082200;Potri.002G108000;Potri.002G127100;Potri.002G186400;Potri.002G213100;Potri.003G015400;Potri.003G056900;Potri.003G091700;Potri.003G161300;Potri.003G167400;Potri.004G050200;Potri.004G140600;Potri.00…	K14514+K14492+K14489+K14488+K14487+K13422+K14496+K14484+K14484+K13449+K14487+K14492+K14484+K14499+K14484+K14493+K14498+K14484+K14496+K14487+K14488+K14486+K14432+K14488+K14488+K13946+K14514+K14484+K14498+K14486+K14488+K14432+K14484+K14515+K14496+K14488+K14488+K14488+K14487+K14488+K14488+K14496+K14494+K14489+K14509+K14516+K14484+K14488+K14488+K13946+K14490+K14492+K14484+K14509+K14484+K14484+K13946+…
Pyrimidine metabolism	ko00240	30	168	1173	6982	Potri.001G003700;Potri.002G134600;Potri.002G222300;Potri.002G250000;Potri.002G261900;Potri.003G104700;Potri.003G107300;Potri.003G169300;Potri.005G057700;Potri.006G143500;Potri.007G045300;Potri.008G080100;Potri.008G216500;Potri.010G055900;Potri.010G088000;Potri.010G176500;Potri.012G039300;Potri.012G136900;Potri.013G076400;Potri.013G142200;Potri.013G142300;Potri.014G148200;Potri.015G003000;Potri.01…	K03025+K13800+K00857+K16904+K01520+K02684+K03026+K02685+K09903+K03026+K02320+K01937+K01955+K02321+K03787+K01937+K02325+K03014+K03505+K03043+K03046+K16904+K03021+K01493+K03014+K02328+K10808+K00876+K14641+K03505
Monobactam biosynthesis	ko00261	5	15	1173	6982	Potri.002G024200;Potri.005G237300;Potri.008G159000;Potri.010G081200;Potri.010G105000	K13811+K13811+K13811+K13811+K00133
Butanoate metabolism	ko00650	3	31	1173	6982	Potri.004G075200;Potri.010G178200;Potri.015G097200	K01580+K01653+K01652
2-Oxocarboxylic acid metabolism	ko01210	13	79	1173	6982	Potri.002G113600;Potri.004G074900;Potri.005G095800;Potri.008G172500;Potri.010G105000;Potri.010G176000;Potri.010G178200;Potri.011G052700;Potri.014G055100;Potri.014G153400;Potri.015G097200;Potri.018G022200;Potri.T120600	K00826+K00031+K00818+K01703+K00133+K00031+K01653+K00053+K00053+K01681+K01652+K00811+K00031
Pyruvate metabolism	ko00620	20	126	1173	6982	Potri.001G001600;Potri.001G122400;Potri.001G167100;Potri.001G287400;Potri.001G391900;Potri.002G141700;Potri.002G214100;Potri.006G198700;Potri.007G011200;Potri.008G002500;Potri.008G166800;Potri.009G084700;Potri.010G233200;Potri.012G002500;Potri.013G114300;Potri.014G081000;Potri.015G074100;Potri.015G092000;Potri.017G092500;Potri.018G046600	K00873+K00016+K14085+K00026+K01595+K00025+K01595+K00102+K01610+K00873+K00025+K00873+K00873+K00873+K00627+K01962+K00128+K01638+K02160+K00029
Anthocyanin biosynthesis	ko00942	1	2	1173	6982	Potri.013G118700	K12930
Carotenoid biosynthesis	ko00906	18	61	1173	6982	Potri.001G242600;Potri.001G303800;Potri.002G126100;Potri.002G235200;Potri.003G176300;Potri.003G218000;Potri.004G074000;Potri.004G140900;Potri.004G235400;Potri.006G199600;Potri.009G033900;Potri.009G101700;Potri.011G112400;Potri.014G029100;Potri.014G056800;Potri.017G145700;Potri.019G030700;Potri.T138700	K09843+K14595+K09843+K02293+K09840+K02291+K15746+K09843+K09843+K09835+K09843+K09843+K09840+K09843+K17912+K15746+K09839+K06443
C5-Branched dibasic acid metabolism	ko00660	3	9	1173	6982	Potri.008G172500;Potri.010G178200;Potri.015G097200	K01703+K01653+K01652
Tropane, piperidine and pyridine alkaloid biosynthesis	ko00960	12	46	1173	6982	Potri.001G118300;Potri.005G079200;Potri.006G089800;Potri.007G088400;Potri.010G088900;Potri.010G089000;Potri.010G199700;Potri.013G026000;Potri.015G082900;Potri.017G014200;Potri.018G022200;Potri.T079800	K00276+K15849+K08081+K15849+K00276+K00276+K08081+K08081+K00276+K00815+K00811+K15849
Regulation of autophagy	ko04140	5	48	1173	6982	Potri.001G024600;Potri.002G181000;Potri.003G181900;Potri.008G099400;Potri.013G090800	K08332+K08269+K07198+K08341+K07198
Inositol phosphate metabolism	ko00562	11	86	1173	6982	Potri.001G240300;Potri.001G252100;Potri.001G283300;Potri.005G078700;Potri.007G047900;Potri.007G089000;Potri.008G026900;Potri.009G046600;Potri.012G099300;Potri.013G073600;Potri.015G109500	K01803+K05857+K00140+K01858+K01110+K01858+K18081+K05857+K01114+K01114+K00915
Galactose metabolism	ko00052	24	84	1173	6982	Potri.001G079500;Potri.001G254800;Potri.002G191600;Potri.002G193700;Potri.003G037000;Potri.003G123700;Potri.004G038100;Potri.004G074600;Potri.004G129700;Potri.005G097000;Potri.006G152600;Potri.008G189400;Potri.010G042000;Potri.010G109500;Potri.010G150400;Potri.011G154500;Potri.011G166700;Potri.013G005800;Potri.014G116800;Potri.016G054700;Potri.017G080000;Potri.017G080100;Potri.018G126400;Potri.01…	K00850+K00844+K18819+K06611+K12309+K01784+K07407+K00963+K01785+K00011+K00850+K18819+K18819+K01835+K18819+K01187+K06617+K18819+K18819+K06617+K01785+K01785+K06617+K07407
Glutathione metabolism	ko00480	35	158	1173	6982	Potri.001G102000;Potri.001G102100;Potri.001G431200;Potri.001G431600;Potri.001G436800;Potri.001G437400;Potri.004G074900;Potri.004G078100;Potri.004G108900;Potri.005G037800;Potri.006G254500;Potri.008G175100;Potri.010G032800;Potri.010G035500;Potri.010G060900;Potri.010G061100;Potri.010G061400;Potri.010G176000;Potri.011G113400;Potri.011G114000;Potri.011G140400;Potri.011G140600;Potri.011G140700;Potri.01…	K01256+K01256+K00799+K00799+K00799+K00799+K00031+K00799+K00033+K00799+K00434+K00799+K00799+K00799+K00799+K00799+K00799+K00031+K00799+K00799+K00799+K00799+K00799+K00799+K00434+K10808+K00033+K00799+K00799+K00799+K00033+K00799+K00799+K00031+K00799
Phenylalanine metabolism	ko00360	19	80	1173	6982	Potri.001G036900;Potri.001G118300;Potri.001G304800;Potri.003G099700;Potri.004G102000;Potri.005G079200;Potri.006G126800;Potri.007G088400;Potri.009G099800;Potri.010G088900;Potri.010G089000;Potri.010G224100;Potri.010G224200;Potri.015G082900;Potri.017G014200;Potri.017G112800;Potri.018G022200;Potri.T071600;Potri.T079800	K01904+K00276+K00588+K01904+K01904+K15849+K10775+K15849+K00588+K00276+K00276+K10775+K10775+K00276+K00815+K01904+K00811+K01904+K15849
RNA transport	ko03013	15	250	1173	6982	Potri.001G168100;Potri.003G021900;Potri.004G093600;Potri.004G168700;Potri.005G198500;Potri.005G209600;Potri.006G103300;Potri.007G124200;Potri.009G036900;Potri.009G066400;Potri.010G151700;Potri.011G134700;Potri.012G017500;Potri.015G001200;Potri.018G030700	K14288+K13114+K03262+K14311+K13126+K14319+K14293+K13130+K13171+K03241+K03113+K03113+K14293+K03537+K07936
Protein export	ko03060	4	75	1173	6982	Potri.001G087500;Potri.001G171200;Potri.001G387600;Potri.013G018000	K09490+K13280+K10956+K09490
Other types of O-glycan biosynthesis	ko00514	2	8	1173	6982	Potri.006G048500;Potri.008G092700	K18134+K18134
Terpenoid backbone biosynthesis	ko00900	11	87	1173	6982	Potri.001G250900;Potri.001G457000;Potri.002G004000;Potri.004G104800;Potri.004G150400;Potri.004G208500;Potri.005G034600;Potri.005G035300;Potri.005G127100;Potri.005G257000;Potri.009G169900	K11778+K00021+K00021+K15889+K03527+K00021+K00869+K00869+K13789+K00021+K00021
Other glycan degradation	ko00511	10	31	1173	6982	Potri.003G003400;Potri.003G037000;Potri.007G056300;Potri.009G093500;Potri.009G093900;Potri.010G184200;Potri.012G131400;Potri.014G143600;Potri.014G191600;Potri.014G191900	K17108+K12309+K01191+K15923+K15923+K01227+K01206+K01191+K01444+K01444
Vitamin B6 metabolism	ko00750	4	15	1173	6982	Potri.001G182100;Potri.002G102600;Potri.003G034600;Potri.018G054800	K06215+K00275+K13248+K13248
Arginine and proline metabolism	ko00330	11	79	1173	6982	Potri.001G167100;Potri.004G106400;Potri.004G163300;Potri.006G151300;Potri.007G052600;Potri.008G198800;Potri.009G162600;Potri.010G133900;Potri.015G074100;Potri.018G022200;Potri.018G101500	K14085+K00318+K01583+K12259+K00472+K01611+K12251+K01611+K00128+K00811+K01611
Cysteine and methionine metabolism	ko00270	45	150	1173	6982	Potri.001G009600;Potri.001G084000;Potri.001G122400;Potri.001G287400;Potri.001G320500;Potri.002G049800;Potri.002G078600;Potri.002G113600;Potri.002G141700;Potri.002G160800;Potri.002G189000;Potri.002G189200;Potri.003G132300;Potri.003G187000;Potri.003G190600;Potri.004G134000;Potri.004G167200;Potri.004G190900;Potri.005G048200;Potri.005G182700;Potri.006G041300;Potri.006G123200;Potri.008G099300;Potri.00…	K00558+K01761+K00016+K00026+K01251+K00547+K05933+K00826+K00025+K13034+K00789+K00789+K20772+K01761+K01761+K00558+K01244+K00549+K01738+K05933+K01760+K00789+K00789+K01738+K08967+K00025+K01611+K00899+K00133+K00547+K01611+K00789+K05933+K00789+K00549+K00789+K05933+K00827+K00815+K01251+K00811+K01611+K00549+K01738+K00549
Ubiquitin mediated proteolysis	ko04120	24	175	1173	6982	Potri.001G117200;Potri.001G254500;Potri.002G074700;Potri.003G215400;Potri.006G245400;Potri.008G053800;Potri.008G053900;Potri.008G057500;Potri.008G104400;Potri.008G217700;Potri.009G005700;Potri.009G049600;Potri.010G023800;Potri.010G146500;Potri.010G206800;Potri.011G021700;Potri.012G104100;Potri.013G048900;Potri.014G016100;Potri.015G143200;Potri.016G024800;Potri.016G085200;Potri.016G138900;Potri.01…	K03347+K06688+K03875+K04506+K10144+K10575+K10575+K03364+K10581+K03347+K10144+K06688+K03347+K10581+K10575+K10143+K04649+K03363+K10570+K10143+K10583+K10590+K06689+K03363
Carbon metabolism	ko01200	70	392	1173	6982	Potri.001G001600;Potri.001G079500;Potri.001G145700;Potri.001G177300;Potri.001G240300;Potri.001G254800;Potri.001G283300;Potri.001G287400;Potri.001G320400;Potri.001G391900;Potri.002G009800;Potri.002G013400;Potri.002G057700;Potri.002G093300;Potri.002G122700;Potri.002G141700;Potri.002G160800;Potri.002G214100;Potri.003G119000;Potri.004G009600;Potri.004G074900;Potri.004G108900;Potri.005G048200;Potri.00…	K00873+K00850+K00948+K15918+K01803+K00844+K00140+K00026+K00600+K01595+K03781+K00121+K05605+K01834+K00058+K00025+K13034+K01595+K15919+K00605+K00031+K00033+K01738+K01834+K03781+K03841+K15633+K00850+K05605+K01610+K01623+K01455+K01637+K00873+K00134+K00927+K00927+K01738+K00025+K00134+K00873+K00058+K00134+K01057+K00134+K00031+K00873+K00058+K00873+K01601+K00627+K00615+K15919+K01962+K01681+K00134+K01638+…
Glyoxylate and dicarboxylate metabolism	ko00630	23	121	1173	6982	Potri.001G177300;Potri.001G287400;Potri.001G320400;Potri.002G009800;Potri.002G141700;Potri.003G119000;Potri.004G009600;Potri.004G085400;Potri.005G093200;Potri.005G251600;Potri.007G053800;Potri.007G122900;Potri.008G166800;Potri.008G200100;Potri.012G062600;Potri.012G123700;Potri.014G073500;Potri.014G153400;Potri.015G092000;Potri.017G036900;Potri.017G127300;Potri.T005800;Potri.T063100	K15918+K00026+K00600+K03781+K00025+K15919+K00605+K01915+K01915+K03781+K01455+K01637+K00025+K01915+K01601+K02437+K15919+K01681+K01638+K01637+K01915+K01601+K01601
Flavonoid biosynthesis	ko00941	29	70	1173	6982	Potri.001G051500;Potri.001G051600;Potri.001G113100;Potri.001G304800;Potri.002G033600;Potri.003G119100;Potri.003G176900;Potri.004G017600;Potri.004G030700;Potri.004G139500;Potri.004G139600;Potri.004G139700;Potri.005G028000;Potri.005G028100;Potri.005G113700;Potri.005G113900;Potri.005G114000;Potri.005G175200;Potri.008G033500;Potri.008G034300;Potri.009G069100;Potri.009G099800;Potri.010G129800;Potri.01…	K00660+K00660+K05277+K00588+K13082+K05277+K00660+K13065+K08695+K05278+K05278+K05278+K13065+K13065+K00475+K00475+K00475+K00660+K13065+K13065+K13083+K00588+K13081+K00660+K05280+K00660+K09754+K09754+K13065
Ribosome biogenesis in eukaryotes	ko03008	9	116	1173	6982	Potri.002G024100;Potri.004G159700;Potri.008G192700;Potri.012G082600;Potri.012G110000;Potri.012G144800;Potri.013G151600;Potri.015G001200;Potri.018G030700	K12619+K14573+K14563+K14559+K14563+K14563+K14571+K03537+K07936
Phenylpropanoid biosynthesis	ko00940	70	286	1173	6982	Potri.001G011000;Potri.001G011200;Potri.001G011300;Potri.001G015100;Potri.001G036900;Potri.001G222900;Potri.001G225900;Potri.001G226100;Potri.001G268600;Potri.001G304800;Potri.001G403900;Potri.001G451100;Potri.002G018000;Potri.002G018300;Potri.002G031200;Potri.002G180500;Potri.002G180600;Potri.003G059200;Potri.003G099700;Potri.003G214700;Potri.004G015300;Potri.004G017600;Potri.004G019400;Potri.00…	K00430+K00430+K00430+K01188+K01904+K01188+K01188+K01188+K00083+K00588+K05350+K13066+K00430+K00083+K00430+K13066+K13066+K18368+K01904+K00430+K00430+K13065+K05350+K05350+K01904+K00430+K13065+K13065+K00430+K00430+K09755+K00430+K10775+K00083+K09755+K00430+K00430+K00430+K00430+K13065+K13065+K11188+K00083+K00588+K00430+K00430+K01188+K01188+K10775+K10775+K00430+K00083+K13066+K13066+K00430+K00430+K00430+…
Brassinosteroid biosynthesis	ko00905	4	27	1173	6982	Potri.004G117700;Potri.010G139300;Potri.017G099000;Potri.019G071200	K12640+K15639+K12640+K15639
Citrate cycle (TCA cycle)	ko00020	10	83	1173	6982	Potri.001G287400;Potri.002G141700;Potri.004G074900;Potri.007G011200;Potri.008G105300;Potri.008G166800;Potri.010G176000;Potri.013G114300;Potri.014G153400;Potri.T120600	K00026+K00025+K00031+K01610+K01648+K00025+K00031+K00627+K01681+K00031
Phenylalanine, tyrosine and tryptophan biosynthesis	ko00400	13	77	1173	6982	Potri.002G146400;Potri.005G043400;Potri.005G073300;Potri.005G079200;Potri.005G084600;Potri.005G162800;Potri.007G088400;Potri.008G040700;Potri.010G190600;Potri.010G221600;Potri.017G014200;Potri.018G022200;Potri.T079800	K00800+K13832+K01626+K15849+K00891+K01626+K15849+K01736+K01657+K01736+K00815+K00811+K15849
Nitrogen metabolism	ko00910	8	53	1173	6982	Potri.001G348300;Potri.004G085400;Potri.005G093200;Potri.005G156600;Potri.007G053800;Potri.008G200100;Potri.016G043700;Potri.017G127300	K02575+K01915+K01915+K01673+K01455+K01915+K01674+K01915
Arginine biosynthesis	ko00220	6	55	1173	6982	Potri.004G085400;Potri.005G093200;Potri.005G095800;Potri.008G200100;Potri.017G127300;Potri.018G022200	K01915+K01915+K00818+K01915+K01915+K00811
Sulfur metabolism	ko00920	13	53	1173	6982	Potri.001G293400;Potri.002G024200;Potri.002G160800;Potri.002G227400;Potri.004G036400;Potri.005G048200;Potri.005G237300;Potri.008G153300;Potri.008G159000;Potri.010G081200;Potri.014G154100;Potri.014G154200;Potri.019G045800	K00860+K13811+K13034+K05907+K01082+K01738+K13811+K01738+K13811+K13811+K05907+K05907+K01738
RNA polymerase	ko03020	8	53	1173	6982	Potri.001G003700;Potri.003G107300;Potri.006G143500;Potri.012G136900;Potri.013G142200;Potri.013G142300;Potri.015G003000;Potri.015G138800	K03025+K03026+K03026+K03014+K03043+K03046+K03021+K03014
Glycerophospholipid metabolism	ko00564	22	131	1173	6982	Potri.002G063700;Potri.002G133100;Potri.003G015000;Potri.003G037700;Potri.003G060300;Potri.004G001200;Potri.006G006700;Potri.006G046900;Potri.006G070400;Potri.006G097800;Potri.006G253900;Potri.008G058200;Potri.008G211100;Potri.010G133800;Potri.010G201200;Potri.012G047300;Potri.012G047400;Potri.012G099300;Potri.013G073600;Potri.014G047900;Potri.015G039000;Potri.015G085200	K14156+K13513+K01115+K01115+K06130+K00981+K00968+K00006+K01047+K13508+K01115+K13508+K01115+K00993+K13508+K05929+K05929+K01114+K01114+K16818+K05929+K01517
Pentose phosphate pathway	ko00030	15	87	1173	6982	Potri.001G079500;Potri.001G145700;Potri.004G108900;Potri.005G257800;Potri.006G094400;Potri.006G152600;Potri.007G015500;Potri.010G109500;Potri.010G157200;Potri.011G015600;Potri.011G015900;Potri.014G068200;Potri.017G106900;Potri.018G090100;Potri.T017700	K00850+K00948+K00033+K00895+K03841+K00850+K01623+K01835+K01057+K00895+K00895+K00615+K00033+K01623+K00033
Biotin metabolism	ko00780	8	26	1173	6982	Potri.003G142000;Potri.004G131500;Potri.011G079700;Potri.013G059000;Potri.016G046700;Potri.018G062900;Potri.019G033600;Potri.T111000	K09458+K09458+K09458+K00059+K00208+K09458+K00059+K00208
Ribosome	ko03010	20	500	1173	6982	Potri.001G424900;Potri.002G064600;Potri.002G257500;Potri.003G010200;Potri.003G067400;Potri.004G029400;Potri.004G131800;Potri.005G042100;Potri.007G086800;Potri.008G153100;Potri.008G187000;Potri.010G217100;Potri.011G053900;Potri.012G021700;Potri.012G096600;Potri.012G108400;Potri.013G139000;Potri.015G033700;Potri.018G115400;Potri.T172300	K02954+K02964+K02894+K02942+K02913+K02915+K02955+K02881+K02908+K02881+K02900+K02973+K02988+K02942+K02880+K02915+K02950+K02987+K02949+K02915
Isoquinoline alkaloid biosynthesis	ko00950	11	53	1173	6982	Potri.001G118300;Potri.001G388900;Potri.005G079200;Potri.007G088400;Potri.010G088900;Potri.010G089000;Potri.011G047300;Potri.015G082900;Potri.017G014200;Potri.018G022200;Potri.T079800	K00276+K00422+K15849+K15849+K00276+K00276+K00422+K00276+K00815+K00811+K15849
Biosynthesis of amino acids	ko01230	75	343	1173	6982	Potri.001G001600;Potri.001G079500;Potri.001G145700;Potri.001G167100;Potri.001G240300;Potri.001G320400;Potri.002G093300;Potri.002G113600;Potri.002G122700;Potri.002G146400;Potri.002G160800;Potri.002G189000;Potri.002G189200;Potri.004G074900;Potri.004G085400;Potri.004G190900;Potri.004G222400;Potri.005G043400;Potri.005G048200;Potri.005G073300;Potri.005G079200;Potri.005G084600;Potri.005G093200;Potri.00…	K00873+K00850+K00948+K14085+K01803+K00600+K01834+K00826+K00058+K00800+K13034+K00789+K00789+K00031+K01915+K00549+K00765+K13832+K01738+K01626+K15849+K00891+K01915+K00818+K10206+K01626+K01834+K01760+K15633+K00789+K00850+K01623+K15849+K00873+K01736+K00134+K00927+K00927+K00789+K01738+K01703+K00134+K01915+K00873+K00058+K00134+K00133+K00789+K00134+K00031+K01653+K01657+K01736+K00873+K00058+K00053+K00873+…
Riboflavin metabolism	ko00740	2	16	1173	6982	Potri.017G050400;Potri.019G054000	K14652+K11752
beta-Alanine metabolism	ko00410	12	73	1173	6982	Potri.001G118300;Potri.001G167100;Potri.001G283300;Potri.002G057700;Potri.004G075200;Potri.006G151300;Potri.006G264100;Potri.010G088900;Potri.010G089000;Potri.011G010400;Potri.015G074100;Potri.015G082900	K00276+K14085+K00140+K05605+K01580+K12259+K05605+K00276+K00276+K01578+K00128+K00276
Lysine biosynthesis	ko00300	3	21	1173	6982	Potri.001G167100;Potri.005G115800;Potri.010G105000	K14085+K10206+K00133
Valine, leucine and isoleucine degradation	ko00280	12	74	1173	6982	Potri.001G167100;Potri.001G283300;Potri.002G057700;Potri.002G113600;Potri.002G216400;Potri.005G185400;Potri.005G213300;Potri.006G264100;Potri.009G011700;Potri.015G074100;Potri.016G132200;Potri.T029700	K14085+K00140+K05605+K00826+K07513+K00166+K01968+K05605+K00253+K00128+K00827+K09699
mRNA surveillance pathway	ko03015	14	176	1173	6982	Potri.002G115000;Potri.003G021900;Potri.003G217900;Potri.005G073200;Potri.005G198500;Potri.005G227100;Potri.006G247100;Potri.008G170400;Potri.008G180000;Potri.009G036900;Potri.010G145200;Potri.015G043200;Potri.018G034200;Potri.018G057200	K14411+K13114+K04382+K14396+K13126+K11583+K11584+K14411+K11584+K13171+K14405+K14376+K11584+K14376
Basal transcription factors	ko03022	5	61	1173	6982	Potri.003G157400;Potri.012G119500;Potri.015G067500;Potri.015G118200;Potri.018G103200	K03135+K14649+K03124+K14649+K10842
Oxidative phosphorylation	ko00190	16	196	1173	6982	Potri.001G161400;Potri.002G117800;Potri.002G181300;Potri.004G163000;Potri.005G154900;Potri.006G082500;Potri.006G188600;Potri.007G022700;Potri.008G196600;Potri.013G009400;Potri.013G138800;Potri.013G141400;Potri.016G139800;Potri.018G090300;Potri.019G029200;Potri.T074500	K01535+K03937+K01507+K03965+K02110+K01507+K01535+K01507+K03952+K01507+K05573+K05582+K02150+K01535+K02150+K05577
RNA degradation	ko03018	16	151	1173	6982	Potri.001G054400;Potri.001G079500;Potri.001G269500;Potri.001G278000;Potri.002G024100;Potri.002G036300;Potri.003G173900;Potri.003G222400;Potri.004G200400;Potri.005G198500;Potri.006G152600;Potri.009G047500;Potri.009G161500;Potri.010G135100;Potri.010G222800;Potri.011G166400	K04077+K00850+K12626+K12627+K12619+K12608+K04077+K04077+K12581+K13126+K00850+K03678+K12581+K04077+K12613+K12616
Photosynthesis - antenna proteins	ko00196	5	27	1173	6982	Potri.002G189300;Potri.003G020400;Potri.005G239300;Potri.014G029700;Potri.014G165100	K08912+K08917+K08912+K08911+K08913
Circadian rhythm - plant	ko04712	14	59	1173	6982	Potri.001G051500;Potri.001G051600;Potri.002G064400;Potri.003G045000;Potri.003G176900;Potri.005G175200;Potri.006G233800;Potri.010G215200;Potri.011G021700;Potri.012G138800;Potri.014G111400;Potri.014G145100;Potri.015G061900;Potri.015G143200	K00660+K00660+K12124+K12125+K00660+K00660+K12125+K12129+K10143+K00660+K12126+K00660+K12127+K10143
Glycine, serine and threonine metabolism	ko00260	20	99	1173	6982	Potri.001G106000;Potri.001G118300;Potri.001G167100;Potri.001G177300;Potri.001G320400;Potri.002G093300;Potri.002G122700;Potri.003G119000;Potri.004G009600;Potri.005G168000;Potri.006G113300;Potri.009G096600;Potri.010G088900;Potri.010G089000;Potri.010G105000;Potri.010G249600;Potri.012G123700;Potri.014G073500;Potri.015G082900;Potri.016G132200	K12235+K00276+K14085+K15918+K00600+K01834+K00058+K15919+K00605+K01834+K15633+K00058+K00276+K00276+K00133+K00058+K02437+K15919+K00276+K00827
Mismatch repair	ko03430	18	73	1173	6982	Potri.001G247700;Potri.004G041900;Potri.004G094200;Potri.004G094300;Potri.006G158300;Potri.006G167600;Potri.006G172600;Potri.006G212100;Potri.006G275700;Potri.008G189900;Potri.010G239200;Potri.011G077000;Potri.013G076400;Potri.015G041400;Potri.015G057300;Potri.016G045800;Potri.019G040000;Potri.019G042900	K04802+K07456+K10747+K10747+K08737+K10739+K07466+K10740+K10739+K07466+K10740+K10746+K03505+K10746+K07466+K02328+K10756+K03505
Ascorbate and aldarate metabolism	ko00053	12	55	1173	6982	Potri.001G099600;Potri.001G167100;Potri.004G118600;Potri.006G254500;Potri.008G094300;Potri.009G081300;Potri.010G159800;Potri.013G040600;Potri.015G074100;Potri.016G084800;Potri.017G092000;Potri.T103900	K08232+K14085+K00012+K00434+K00012+K17744+K00012+K10046+K00128+K00434+K00012+K10046
Zeatin biosynthesis	ko00908	8	23	1173	6982	Potri.001G020900;Potri.002G030500;Potri.005G232300;Potri.006G047200;Potri.006G048200;Potri.009G147600;Potri.010G030500;Potri.016G044100	K00279+K00279+K00279+K13495+K13495+K00791+K10760+K00279
Taurine and hypotaurine metabolism	ko00430	2	19	1173	6982	Potri.004G075200;Potri.004G129400	K01580+K10712
Carbon fixation in photosynthetic organisms	ko00710	23	113	1173	6982	Potri.001G240300;Potri.001G287400;Potri.001G391900;Potri.002G141700;Potri.002G214100;Potri.006G094400;Potri.007G011200;Potri.007G015500;Potri.008G083900;Potri.008G084400;Potri.008G084500;Potri.008G166800;Potri.008G179300;Potri.010G055400;Potri.010G172400;Potri.012G062600;Potri.014G068200;Potri.015G091400;Potri.016G091800;Potri.018G046600;Potri.018G090100;Potri.T005800;Potri.T063100	K01803+K00026+K01595+K00025+K01595+K03841+K01610+K01623+K00134+K00927+K00927+K00025+K00134+K00134+K00134+K01601+K00615+K00134+K00927+K00029+K01623+K01601+K01601
Fatty acid metabolism	ko01212	23	105	1173	6982	Potri.001G012500;Potri.001G012700;Potri.001G120900;Potri.001G177900;Potri.001G321800;Potri.002G192400;Potri.002G216400;Potri.003G142000;Potri.004G131500;Potri.006G101800;Potri.006G192000;Potri.007G090400;Potri.010G052400;Potri.011G079700;Potri.012G101500;Potri.013G059000;Potri.014G081000;Potri.015G099600;Potri.016G046700;Potri.017G092500;Potri.018G062900;Potri.019G033600;Potri.T111000	K10256+K10256+K00648+K10781+K01897+K01897+K07513+K09458+K09458+K00232+K10256+K00232+K10251+K09458+K10781+K00059+K01962+K10781+K00208+K02160+K09458+K00059+K00208
Histidine metabolism	ko00340	3	28	1173	6982	Potri.001G167100;Potri.004G222400;Potri.015G074100	K14085+K00765+K00128
Tyrosine metabolism	ko00350	14	88	1173	6982	Potri.001G118300;Potri.001G388900;Potri.002G013400;Potri.005G079200;Potri.007G088400;Potri.010G088900;Potri.010G089000;Potri.011G047300;Potri.015G082900;Potri.017G014200;Potri.018G022200;Potri.018G142700;Potri.T079800;Potri.T107200	K00276+K00422+K00121+K15849+K15849+K00276+K00276+K00422+K00276+K00815+K00811+K00121+K15849+K18857
Diterpenoid biosynthesis	ko00904	7	34	1173	6982	Potri.002G129700;Potri.002G151300;Potri.010G096800;Potri.011G095600;Potri.012G132400;Potri.013G125300;Potri.014G073700	K04122+K05282+K04125+K04125+K05282+K17961+K05282
DNA replication	ko03030	28	90	1173	6982	Potri.001G070500;Potri.001G074000;Potri.001G247700;Potri.003G104700;Potri.003G169300;Potri.004G094200;Potri.004G094300;Potri.004G131600;Potri.006G167600;Potri.006G172600;Potri.006G188700;Potri.006G212100;Potri.006G275700;Potri.007G045300;Potri.008G189900;Potri.009G121500;Potri.010G055900;Potri.010G239200;Potri.010G239600;Potri.012G039300;Potri.013G076400;Potri.014G121000;Potri.014G180200;Potri.01…	K02540+K02542+K04802+K02684+K02685+K10747+K10747+K02541+K10739+K07466+K02209+K10740+K10739+K02320+K07466+K02212+K02321+K10740+K10743+K02325+K03505+K02210+K10742+K07466+K02328+K02209+K10756+K03505
Ubiquinone and other terpenoid-quinone biosynthesis	ko00130	13	60	1173	6982	Potri.001G036900;Potri.001G410700;Potri.003G099700;Potri.004G028900;Potri.004G102000;Potri.006G240100;Potri.011G033100;Potri.011G129400;Potri.011G164100;Potri.012G070000;Potri.017G014200;Potri.017G112800;Potri.T071600	K01904+K03809+K01904+K03809+K01904+K09834+K03809+K03809+K14760+K02552+K00815+K01904+K01904
Proteasome	ko03050	10	96	1173	6982	Potri.004G174200;Potri.004G176600;Potri.005G229200;Potri.006G110800;Potri.009G133800;Potri.010G084800;Potri.011G167700;Potri.015G122400;Potri.016G015400;Potri.017G111900	K02731+K03033+K02725+K02730+K02731+K02734+K06699+K02726+K02728+K11599
Purine metabolism	ko00230	48	207	1173	6982	Potri.001G001600;Potri.001G003700;Potri.001G121400;Potri.001G145700;Potri.001G150800;Potri.001G160100;Potri.001G293400;Potri.002G024200;Potri.002G198600;Potri.003G104700;Potri.003G107300;Potri.003G169300;Potri.004G041800;Potri.005G237300;Potri.006G143500;Potri.007G045300;Potri.008G002500;Potri.008G038100;Potri.008G058600;Potri.008G159000;Potri.009G084700;Potri.010G055900;Potri.010G081200;Potri.01…	K00873+K03025+K00759+K00948+K14977+K02083+K00860+K13811+K01933+K02684+K03026+K02685+K01466+K13811+K03026+K02320+K00873+K00856+K01952+K13811+K00873+K02321+K13811+K03787+K01835+K00856+K00873+K01514+K00873+K02325+K03014+K11808+K03505+K03043+K03046+K01522+K00759+K01933+K03021+K01517+K00939+K03014+K02328+K01490+K10808+K14641+K03505+K00939
Valine, leucine and isoleucine biosynthesis	ko00290	6	23	1173	6982	Potri.002G113600;Potri.008G172500;Potri.010G178200;Potri.011G052700;Potri.014G055100;Potri.015G097200	K00826+K01703+K01653+K00053+K00053+K01652
Phosphatidylinositol signaling system	ko04070	10	86	1173	6982	Potri.001G252100;Potri.004G001200;Potri.004G122900;Potri.007G047900;Potri.008G026900;Potri.008G103900;Potri.009G021500;Potri.009G046600;Potri.015G109500;Potri.017G076400	K05857+K00981+K02183+K01110+K18081+K02183+K02183+K05857+K00915+K13024
Tryptophan metabolism	ko00380	9	52	1173	6982	Potri.001G167100;Potri.001G334700;Potri.002G009800;Potri.005G251600;Potri.006G243400;Potri.012G083300;Potri.013G027000;Potri.015G074100;Potri.018G033200	K14085+K07408+K03781+K03781+K11816+K16903+K07408+K00128+K11816
Nucleotide excision repair	ko03420	17	100	1173	6982	Potri.001G247700;Potri.004G094200;Potri.004G094300;Potri.006G167600;Potri.006G172600;Potri.006G212100;Potri.006G275700;Potri.008G189900;Potri.010G239200;Potri.012G039300;Potri.013G076400;Potri.014G016100;Potri.015G057300;Potri.016G045800;Potri.018G103200;Potri.019G040000;Potri.019G042900	K04802+K10747+K10747+K10739+K07466+K10740+K10739+K07466+K10740+K02325+K03505+K10570+K07466+K02328+K10842+K10756+K03505
Thiamine metabolism	ko00730	5	24	1173	6982	Potri.001G249200;Potri.002G205800;Potri.003G015700;Potri.004G020500;Potri.011G025200	K03147+K00949+K14153+K03146+K03146
Glycosphingolipid biosynthesis - ganglio series	ko00604	1	7	1173	6982	Potri.003G037000	K12309
ABC transporters	ko02010	9	43	1173	6982	Potri.001G139700;Potri.001G354900;Potri.003G182600;Potri.003G182800;Potri.003G182900;Potri.014G113100;Potri.015G000200;Potri.017G074000;Potri.018G149700	K05658+K05658+K05674+K05674+K05674+K05658+K05658+K05658+K05670
Glycosphingolipid biosynthesis - globo series	ko00603	3	14	1173	6982	Potri.004G038100;Potri.004G039300;Potri.019G056700	K07407+K01988+K07407
Photosynthesis	ko00195	15	147	1173	6982	Potri.001G416400;Potri.001G438600;Potri.001G438700;Potri.001G470700;Potri.003G148900;Potri.005G154500;Potri.005G154900;Potri.005G246100;Potri.008G020100;Potri.009G079300;Potri.013G136700;Potri.013G141000;Potri.013G142100;Potri.016G094200;Potri.T058600	K08901+K03541+K03541+K02639+K02694+K02712+K02110+K02638+K02639+K02709+K02635+K02707+K02714+K02634+K02634
Porphyrin and chlorophyll metabolism	ko00860	7	68	1173	6982	Potri.001G403300;Potri.005G214200;Potri.009G004100;Potri.011G122400;Potri.014G034200;Potri.015G105700;Potri.T071000	K00218+K08099+K13071+K00218+K00510+K03428+K01599
Sesquiterpenoid and triterpenoid biosynthesis	ko00909	2	29	1173	6982	Potri.005G146700;Potri.007G002100	K00511+K15813
Ether lipid metabolism	ko00565	8	41	1173	6982	Potri.003G015000;Potri.003G037700;Potri.006G070400;Potri.006G253900;Potri.008G211100;Potri.010G133800;Potri.012G099300;Potri.013G073600	K01115+K01115+K01047+K01115+K01115+K00993+K01114+K01114
Spliceosome	ko03040	44	282	1173	6982	Potri.001G030000;Potri.001G042600;Potri.001G042700;Potri.001G082100;Potri.001G269500;Potri.001G277700;Potri.001G277800;Potri.001G278000;Potri.001G289800;Potri.001G347100;Potri.002G003000;Potri.002G175000;Potri.002G192500;Potri.002G203600;Potri.003G023800;Potri.004G188900;Potri.005G021600;Potri.005G024600;Potri.005G257400;Potri.006G163700;Potri.006G167000;Potri.006G197000;Potri.006G265700;Potri.00…	K09567+K03283+K03283+K11984+K12626+K12834+K12834+K12627+K12821+K12823+K12836+K12893+K12820+K11091+K12891+K12836+K12849+K12890+K12811+K06063+K11098+K12900+K12842+K12825+K12843+K12843+K03283+K03283+K03283+K12824+K12822+K12897+K12834+K12821+K12815+K03283+K03283+K03283+K12858+K12890+K12893+K12890+K12900+K11099
Plant-pathogen interaction	ko04626	49	291	1173	6982	Potri.001G098300;Potri.001G288600;Potri.001G406100;Potri.002G001400;Potri.002G017000;Potri.002G226600;Potri.003G012900;Potri.003G099100;Potri.003G120800;Potri.003G183000;Potri.004G002500;Potri.004G073600;Potri.004G122900;Potri.005G245000;Potri.005G259900;Potri.006G112500;Potri.006G137300;Potri.006G147100;Potri.006G147200;Potri.006G271300;Potri.007G128600;Potri.008G103900;Potri.008G112700;Potri.00…	K13447+K13449+K13459+K13448+K13412+K13429+K13457+K13457+K13412+K05391+K13456+K04079+K02183+K13412+K13448+K13448+K13447+K13459+K13459+K05391+K13448+K02183+K09487+K02183+K13448+K13459+K13459+K13447+K13459+K13434+K09487+K13448+K13448+K13447+K04079+K13448+K13412+K13412+K13448+K13448+K05391+K04079+K04368+K13424+K13434+K13459+K13459+K13459+K13448
Lipoic acid metabolism	ko00785	1	8	1173	6982	Potri.002G131000	K03801
Peroxisome	ko04146	26	134	1173	6982	Potri.001G321800;Potri.001G404600;Potri.002G009800;Potri.002G192400;Potri.002G216400;Potri.004G074900;Potri.004G185000;Potri.004G216700;Potri.005G034600;Potri.005G035300;Potri.005G044400;Potri.005G251600;Potri.006G101800;Potri.007G090400;Potri.009G144900;Potri.009G145000;Potri.010G068900;Potri.010G176000;Potri.011G010400;Potri.012G052600;Potri.012G112300;Potri.014G017800;Potri.017G018400;Potri.01…	K01897+K13348+K03781+K01897+K07513+K00031+K13356+K04565+K00869+K00869+K04565+K03781+K00232+K00232+K13356+K13356+K13347+K00031+K01578+K13336+K04564+K13348+K13344+K13356+K13356+K00031
Fructose and mannose metabolism	ko00051	17	87	1173	6982	Potri.001G079500;Potri.001G240300;Potri.001G254800;Potri.005G097000;Potri.005G116200;Potri.005G257800;Potri.006G094400;Potri.006G152600;Potri.007G013900;Potri.007G015500;Potri.007G129700;Potri.011G015600;Potri.011G015900;Potri.013G130400;Potri.017G029000;Potri.018G090100;Potri.T093900	K00850+K01803+K00844+K00011+K01711+K00895+K03841+K00850+K01711+K01623+K00847+K00895+K00895+K19355+K00847+K01623+K01805
Alanine, aspartate and glutamate metabolism	ko00250	8	71	1173	6982	Potri.004G075200;Potri.004G085400;Potri.005G093200;Potri.008G200100;Potri.008G216500;Potri.016G132200;Potri.017G127300;Potri.018G022200	K01580+K01915+K01915+K01915+K01955+K00827+K01915+K00811
Pantothenate and CoA biosynthesis	ko00770	7	39	1173	6982	Potri.002G113600;Potri.006G211300;Potri.008G053600;Potri.010G178200;Potri.011G052700;Potri.014G055100;Potri.015G097200	K00826+K06133+K00859+K01653+K00053+K00053+K01652
Cutin, suberine and wax biosynthesis	ko00073	11	39	1173	6982	Potri.001G249700;Potri.001G326300;Potri.004G185000;Potri.005G092200;Potri.007G072100;Potri.009G043700;Potri.009G144900;Potri.009G145000;Potri.015G100800;Potri.019G075200;Potri.019G075300	K15401+K15400+K13356+K15402+K15402+K15401+K13356+K13356+K15400+K13356+K13356
Folate biosynthesis	ko00790	1	26	1173	6982	Potri.005G259700	K01113
alpha-Linolenic acid metabolism	ko00592	14	71	1173	6982	Potri.001G015500;Potri.001G015600;Potri.002G216400;Potri.004G212100;Potri.006G070400;Potri.006G101800;Potri.007G090400;Potri.008G117300;Potri.014G018200;Potri.014G047900;Potri.014G177200;Potri.017G046200;Potri.018G065600;Potri.T107200	K00454+K00454+K07513+K05894+K01047+K00232+K00232+K10525+K00454+K16818+K00454+K00454+K05894+K18857
Propanoate metabolism	ko00640	9	59	1173	6982	Potri.001G122400;Potri.001G283300;Potri.002G057700;Potri.005G185400;Potri.006G264100;Potri.011G010400;Potri.014G081000;Potri.017G092500;Potri.T029700	K00016+K00140+K05605+K00166+K05605+K01578+K01962+K02160+K09699
Flavone and flavonol biosynthesis	ko00944	2	4	1173	6982	Potri.009G069100;Potri.013G073300	K13083+K05280
Fatty acid elongation	ko00062	11	52	1173	6982	Potri.001G211400;Potri.001G234500;Potri.002G178000;Potri.006G249200;Potri.008G160000;Potri.009G116700;Potri.010G052400;Potri.010G079400;Potri.013G015100;Potri.013G119600;Potri.015G133700	K15397+K15397+K15397+K15397+K15397+K15397+K10251+K15397+K15397+K15397+K15397
One carbon pool by folate	ko00670	3	26	1173	6982	Potri.001G320400;Potri.004G009600;Potri.017G000300	K00600+K00605+K00297
Sphingolipid metabolism	ko00600	8	40	1173	6982	Potri.001G059000;Potri.003G003400;Potri.003G037000;Potri.004G038100;Potri.005G199900;Potri.011G050800;Potri.015G103800;Potri.019G056700	K01634+K17108+K12309+K07407+K04713+K04712+K00654+K07407
Glycosaminoglycan degradation	ko00531	7	20	1173	6982	Potri.003G037000;Potri.005G025200;Potri.006G062200;Potri.010G160800;Potri.012G075900;Potri.014G123800;Potri.018G024200	K12309+K10532+K07964+K07964+K01205+K10532+K07964
Cyanoamino acid metabolism	ko00460	15	81	1173	6982	Potri.001G015100;Potri.001G222900;Potri.001G225900;Potri.001G226100;Potri.001G320400;Potri.001G403900;Potri.002G160800;Potri.004G019400;Potri.004G019800;Potri.004G199600;Potri.007G053800;Potri.010G159900;Potri.010G178800;Potri.016G074200;Potri.019G037400	K01188+K01188+K01188+K01188+K00600+K05350+K13034+K05350+K05350+K13035+K01455+K01188+K01188+K13035+K05349
SNARE interactions in vesicular transport	ko04130	5	56	1173	6982	Potri.001G219200;Potri.002G200400;Potri.006G032900;Potri.013G053200;Potri.019G030800	K08515+K08489+K08503+K08486+K08486
Linoleic acid metabolism	ko00591	9	25	1173	6982	Potri.001G015500;Potri.001G015600;Potri.005G032700;Potri.005G032800;Potri.006G070400;Potri.008G151500;Potri.014G018200;Potri.014G177200;Potri.017G046200	K00454+K00454+K15718+K15718+K01047+K15718+K00454+K00454+K00454
Monoterpenoid biosynthesis	ko00902	2	13	1173	6982	Potri.002G156300;Potri.002G156600	K15095+K15095
Fatty acid biosynthesis	ko00061	16	65	1173	6982	Potri.001G120900;Potri.001G177900;Potri.001G321800;Potri.002G192400;Potri.003G142000;Potri.004G131500;Potri.011G079700;Potri.012G101500;Potri.013G059000;Potri.014G081000;Potri.015G099600;Potri.016G046700;Potri.017G092500;Potri.018G062900;Potri.019G033600;Potri.T111000	K00648+K10781+K01897+K01897+K09458+K09458+K09458+K10781+K00059+K01962+K10781+K00208+K02160+K09458+K00059+K00208
Steroid biosynthesis	ko00100	11	51	1173	6982	Potri.001G070300;Potri.001G116500;Potri.001G263700;Potri.002G016300;Potri.003G116000;Potri.003G160500;Potri.005G146700;Potri.005G245800;Potri.008G084800;Potri.016G056000;Potri.T126100	K01824+K14423+K00559+K08242+K14423+K01824+K00511+K08242+K09828+K00559+K01853
Selenocompound metabolism	ko00450	13	24	1173	6982	Potri.001G084000;Potri.002G024200;Potri.003G187000;Potri.003G190600;Potri.004G190900;Potri.004G229800;Potri.005G237300;Potri.006G041300;Potri.008G159000;Potri.010G081200;Potri.013G061800;Potri.019G038200;Potri.T070100	K01761+K13811+K01761+K01761+K00549+K08247+K13811+K01760+K13811+K13811+K00549+K00549+K00549
Stilbenoid, diarylheptanoid and gingerol biosynthesis	ko00945	10	38	1173	6982	Potri.001G304800;Potri.004G017600;Potri.005G028000;Potri.005G028100;Potri.008G033500;Potri.008G034300;Potri.009G099800;Potri.016G031000;Potri.016G031100;Potri.018G104800	K00588+K13065+K13065+K13065+K13065+K13065+K00588+K09754+K09754+K13065
AGE-RAGE signaling pathway in diabetic complications	ko04933	7	20	1173	6982	Potri.001G252100;Potri.009G046600;Potri.011G061500;Potri.013G123800;Potri.014G051800;Potri.018G083400;Potri.019G092300	K05857+K05857+K04392+K04392+K04392+K04392+K04392

## Sheet: 0 h vs_12 h.KEGG_enrichm
#KEGG_n	457	KEGG_N	6982
#Pathway	ko_ID	DEgene	gene	DEgene_all	gene_all
Nicotinate and nicotinamide metabolism	ko00760	1	29	457	6982	Potri.010G113500	K00767
Biosynthesis of unsaturated fatty acids	ko01040	2	42	457	6982	Potri.005G077600;Potri.013G059000	K00232+K00059
Steroid biosynthesis	ko00100	2	51	457	6982	Potri.018G148800;Potri.T126100	K01853+K01853
Carotenoid biosynthesis	ko00906	11	61	457	6982	Potri.001G242600;Potri.001G393800;Potri.002G056800;Potri.002G126100;Potri.003G218000;Potri.004G140900;Potri.004G235400;Potri.005G138400;Potri.007G044300;Potri.009G033900;Potri.013G053100	K09843+K09840+K02291+K09843+K02291+K09843+K09843+K09838+K09838+K09843+K09839
Phenylalanine metabolism	ko00360	8	80	457	6982	Potri.001G118300;Potri.004G102000;Potri.006G126800;Potri.009G099800;Potri.010G089000;Potri.010G224100;Potri.017G112800;Potri.019G049500	K00276+K01904+K10775+K00588+K00276+K10775+K01904+K01904
Plant hormone signal transduction	ko04075	41	402	457	6982	Potri.001G027000;Potri.001G069000;Potri.001G092100;Potri.001G166200;Potri.001G177500;Potri.001G288600;Potri.001G410400;Potri.002G127100;Potri.002G186400;Potri.002G213100;Potri.003G068900;Potri.003G161300;Potri.003G165000;Potri.003G167400;Potri.004G165500;Potri.004G165600;Potri.005G040400;Potri.005G207200;Potri.005G237000;Potri.006G137200;Potri.006G139400;Potri.006G278100;Potri.007G012800;Potri.00…	K14492+K14487+K14497+K13464+K14484+K13449+K14487+K14499+K14484+K14493+K13464+K14487+K13464+K14488+K14488+K14488+K14490+K16189+K14488+K14488+K13464+K14488+K14488+K14487+K14498+K14496+K14509+K14516+K13449+K14487+K14488+K14488+K14488+K14490+K14484+K14509+K12126+K14490+K14487+K14497+K14497
Biosynthesis of amino acids	ko01230	15	343	457	6982	Potri.001G468100;Potri.002G189200;Potri.004G162400;Potri.005G162800;Potri.006G152600;Potri.007G015500;Potri.008G172500;Potri.008G187400;Potri.009G124100;Potri.010G029100;Potri.010G055400;Potri.011G165000;Potri.012G002500;Potri.018G001600;Potri.019G045800	K01623+K00789+K01623+K01626+K00850+K01623+K01703+K14272+K01623+K01915+K00134+K01623+K00873+K00930+K01738
Phosphatidylinositol signaling system	ko04070	2	86	457	6982	Potri.008G068300;Potri.017G076400	K05857+K13024
Cutin, suberine and wax biosynthesis	ko00073	9	39	457	6982	Potri.001G249700;Potri.001G326300;Potri.002G042200;Potri.004G185000;Potri.005G092200;Potri.007G072100;Potri.009G043700;Potri.009G145000;Potri.014G180300	K15401+K15400+K13407+K13356+K15402+K15402+K15401+K13356+K15404
Tyrosine metabolism	ko00350	7	88	457	6982	Potri.001G118300;Potri.001G388900;Potri.004G156500;Potri.010G089000;Potri.018G142700;Potri.T062200;Potri.T107200	K00276+K00422+K00422+K00276+K00121+K00422+K18857
Glutathione metabolism	ko00480	11	158	457	6982	Potri.002G015100;Potri.005G037800;Potri.008G175100;Potri.010G061400;Potri.011G114000;Potri.011G140600;Potri.014G166800;Potri.019G130500;Potri.019G130600;Potri.T035300;Potri.T178900	K00799+K00799+K00799+K00799+K00799+K00799+K00036+K00799+K00799+K00799+K00799
Nitrogen metabolism	ko00910	6	53	457	6982	Potri.001G348300;Potri.001G348900;Potri.005G172400;Potri.009G010200;Potri.010G029100;Potri.016G079600	K02575+K01673+K10534+K01674+K01915+K01674
Cyanoamino acid metabolism	ko00460	4	81	457	6982	Potri.001G015100;Potri.001G222900;Potri.001G225900;Potri.001G226100	K01188+K01188+K01188+K01188
Tropane, piperidine and pyridine alkaloid biosynthesis	ko00960	3	46	457	6982	Potri.001G118300;Potri.006G089800;Potri.010G089000	K00276+K08081+K00276
Ubiquinone and other terpenoid-quinone biosynthesis	ko00130	6	60	457	6982	Potri.004G028900;Potri.004G102000;Potri.008G159400;Potri.012G070000;Potri.017G112800;Potri.019G049500	K03809+K01904+K12502+K02552+K01904+K01904
beta-Alanine metabolism	ko00410	3	73	457	6982	Potri.001G118300;Potri.010G089000;Potri.018G004100	K00276+K00276+K05605
Vitamin B6 metabolism	ko00750	1	15	457	6982	Potri.016G116400	K06215
Plant-pathogen interaction	ko04626	20	291	457	6982	Potri.001G288600;Potri.002G017000;Potri.003G183000;Potri.004G002500;Potri.004G073600;Potri.004G089400;Potri.005G245000;Potri.005G259900;Potri.006G137300;Potri.007G128600;Potri.008G159300;Potri.009G083100;Potri.010G080900;Potri.012G111600;Potri.017G029700;Potri.017G146600;Potri.T013900;Potri.T025100;Potri.T046000;Potri.T124900	K13449+K13412+K05391+K13456+K04079+K13448+K13412+K13448+K13447+K13448+K13448+K13449+K13448+K13447+K13448+K04079+K13459+K13459+K13459+K13448
One carbon pool by folate	ko00670	1	26	457	6982	Potri.011G006800	K00605
Inositol phosphate metabolism	ko00562	4	86	457	6982	Potri.005G078700;Potri.007G089000;Potri.008G068300;Potri.013G073600	K01858+K01858+K05857+K01114
Endocytosis	ko04144	7	242	457	6982	Potri.003G032800;Potri.004G100900;Potri.006G253900;Potri.007G059800;Potri.008G170800;Potri.010G067100;Potri.011G154700	K01115+K19476+K01115+K19476+K05758+K05758+K12191
Flavonoid biosynthesis	ko00941	14	70	457	6982	Potri.001G113100;Potri.003G176900;Potri.004G017600;Potri.005G028000;Potri.005G028100;Potri.005G175200;Potri.009G099800;Potri.012G138800;Potri.014G145100;Potri.018G105400;Potri.018G105500;Potri.018G109900;Potri.019G001200;Potri.T003300	K05277+K00660+K13065+K13065+K13065+K00660+K00588+K00660+K00660+K13065+K13065+K13065+K13065+K05278
Amino sugar and nucleotide sugar metabolism	ko00520	24	203	457	6982	Potri.001G237200;Potri.001G416800;Potri.002G033400;Potri.002G200300;Potri.003G022900;Potri.004G118600;Potri.004G182100;Potri.004G189900;Potri.005G116200;Potri.006G178500;Potri.008G094300;Potri.008G195100;Potri.010G207200;Potri.010G246800;Potri.011G132600;Potri.011G156100;Potri.014G092800;Potri.014G110000;Potri.014G125100;Potri.015G024200;Potri.017G029000;Potri.019G093800;Potri.019G094000;Potri.01…	K08678+K20867+K00975+K00770+K15920+K00012+K20547+K12449+K01711+K08679+K00012+K00975+K08678+K00326+K20867+K12448+K01183+K00975+K00770+K01183+K00847+K01183+K01183+K01183
Linoleic acid metabolism	ko00591	1	25	457	6982	Potri.005G032700	K15718
Selenocompound metabolism	ko00450	2	24	457	6982	Potri.001G084000;Potri.003G187000	K01761+K01761
Sphingolipid metabolism	ko00600	2	40	457	6982	Potri.005G199900;Potri.015G103800	K04713+K00654
Ubiquitin mediated proteolysis	ko04120	4	175	457	6982	Potri.001G254500;Potri.004G002700;Potri.008G104400;Potri.009G049600	K06688+K10143+K10581+K06688
Pentose phosphate pathway	ko00030	12	87	457	6982	Potri.001G468100;Potri.002G069000;Potri.004G162400;Potri.005G191400;Potri.006G152600;Potri.006G186800;Potri.007G015500;Potri.009G124100;Potri.011G165000;Potri.014G166800;Potri.015G007300;Potri.018G109700	K01623+K03841+K01623+K03841+K00850+K00131+K01623+K01623+K01623+K00036+K01057+K00131
Arginine and proline metabolism	ko00330	4	79	457	6982	Potri.004G106400;Potri.004G106800;Potri.007G052600;Potri.017G108800	K00318+K01611+K00472+K01611
Phenylalanine, tyrosine and tryptophan biosynthesis	ko00400	1	77	457	6982	Potri.005G162800	K01626
Fatty acid biosynthesis	ko00061	5	65	457	6982	Potri.001G321800;Potri.012G101500;Potri.013G059000;Potri.015G099600;Potri.016G046700	K01897+K10781+K00059+K10781+K00208
Fatty acid metabolism	ko01212	6	105	457	6982	Potri.001G321800;Potri.005G077600;Potri.012G101500;Potri.013G059000;Potri.015G099600;Potri.016G046700	K01897+K00232+K10781+K00059+K10781+K00208
Stilbenoid, diarylheptanoid and gingerol biosynthesis	ko00945	8	38	457	6982	Potri.004G017600;Potri.005G028000;Potri.005G028100;Potri.009G099800;Potri.018G105400;Potri.018G105500;Potri.018G109900;Potri.019G001200	K13065+K13065+K13065+K00588+K13065+K13065+K13065+K13065
Photosynthesis	ko00195	13	147	457	6982	Potri.001G416400;Potri.001G438600;Potri.001G438700;Potri.001G438800;Potri.001G470700;Potri.002G083500;Potri.002G256400;Potri.010G087300;Potri.010G166800;Potri.011G142200;Potri.013G137300;Potri.T058600;Potri.T091100	K08901+K03541+K03541+K03541+K02639+K03542+K08903+K02639+K08901+K03541+K02635+K02634+K02115
Tryptophan metabolism	ko00380	2	52	457	6982	Potri.005G100400;Potri.018G036800	K03781+K11816
Glycolysis / Gluconeogenesis	ko00010	17	180	457	6982	Potri.001G468100;Potri.002G069000;Potri.004G129700;Potri.004G162400;Potri.005G191400;Potri.006G102500;Potri.006G152600;Potri.006G186800;Potri.007G015500;Potri.009G124100;Potri.010G055400;Potri.011G165000;Potri.012G002500;Potri.017G080000;Potri.018G109700;Potri.018G142700;Potri.T107200	K01623+K03841+K01785+K01623+K03841+K01568+K00850+K00131+K01623+K01623+K00134+K01623+K00873+K01785+K00131+K00121+K18857
Carbon fixation in photosynthetic organisms	ko00710	20	113	457	6982	Potri.001G134000;Potri.001G468100;Potri.002G007100;Potri.002G069000;Potri.002G214100;Potri.002G214800;Potri.002G220400;Potri.004G100000;Potri.004G162400;Potri.005G191400;Potri.005G254100;Potri.007G015500;Potri.008G031700;Potri.008G187400;Potri.009G124100;Potri.010G027800;Potri.010G055400;Potri.011G165000;Potri.014G140500;Potri.017G114600	K00855+K01623+K05298+K03841+K01595+K05298+K05298+K01602+K01623+K03841+K05298+K01623+K00051+K14272+K01623+K01006+K00134+K01623+K05298+K01602
C5-Branched dibasic acid metabolism	ko00660	1	9	457	6982	Potri.008G172500	K01703
Other glycan degradation	ko00511	1	31	457	6982	Potri.007G056300	K01191
Peroxisome	ko04146	9	134	457	6982	Potri.001G321800;Potri.001G394400;Potri.001G404600;Potri.004G185000;Potri.004G216700;Potri.005G077600;Potri.005G100400;Potri.009G047700;Potri.009G145000	K01897+K11517+K13348+K13356+K04565+K00232+K03781+K00830+K13356
Ascorbate and aldarate metabolism	ko00053	3	55	457	6982	Potri.004G118600;Potri.008G094300;Potri.011G087200	K00012+K00012+K14190
Spliceosome	ko03040	1	282	457	6982	Potri.008G085100	K12824
Isoquinoline alkaloid biosynthesis	ko00950	5	53	457	6982	Potri.001G118300;Potri.001G388900;Potri.004G156500;Potri.010G089000;Potri.T062200	K00276+K00422+K00422+K00276+K00422
Pentose and glucuronate interconversions	ko00040	27	160	457	6982	Potri.001G162400;Potri.001G162500;Potri.001G162600;Potri.001G339500;Potri.001G346800;Potri.003G001900;Potri.003G002100;Potri.003G002600;Potri.003G002800;Potri.003G175900;Potri.004G118600;Potri.005G022700;Potri.006G122000;Potri.006G256600;Potri.006G256700;Potri.008G032700;Potri.008G094300;Potri.010G247700;Potri.011G135000;Potri.011G159000;Potri.013G013200;Potri.014G127000;Potri.015G127800;Potri.T1…	K01051+K01051+K01051+K01728+K01184+K01051+K01051+K01051+K01051+K01728+K00012+K01051+K01728+K01051+K01051+K01728+K00012+K01051+K01051+K01213+K01051+K01051+K01051+K01051+K01051+K01051+K01051
Thiamine metabolism	ko00730	3	24	457	6982	Potri.001G249200;Potri.004G020500;Potri.011G025200	K03147+K03146+K03146
Sesquiterpenoid and triterpenoid biosynthesis	ko00909	1	29	457	6982	Potri.007G002100	K15813
Homologous recombination	ko03440	3	72	457	6982	Potri.006G135200;Potri.010G239200;Potri.015G057300	K04482+K10740+K07466
Other types of O-glycan biosynthesis	ko00514	1	8	457	6982	Potri.008G092700	K18134
Phagosome	ko04145	10	120	457	6982	Potri.001G070600;Potri.001G106100;Potri.001G272800;Potri.002G111900;Potri.005G239900;Potri.009G040200;Potri.011G061500;Potri.014G051800;Potri.017G081000;Potri.019G092300	K08054+K07375+K07375+K07374+K07375+K07375+K04392+K04392+K07374+K04392
Propanoate metabolism	ko00640	2	59	457	6982	Potri.005G185400;Potri.018G004100	K00166+K05605
SNARE interactions in vesicular transport	ko04130	1	56	457	6982	Potri.013G053200	K08486
DNA replication	ko03030	7	90	457	6982	Potri.001G070500;Potri.004G131600;Potri.010G239200;Potri.012G039300;Potri.014G121000;Potri.015G057300;Potri.018G112800	K02540+K02541+K10740+K02325+K02210+K07466+K02209
RNA transport	ko03013	5	250	457	6982	Potri.001G168100;Potri.005G209600;Potri.006G103300;Potri.006G160300;Potri.018G030700	K14288+K14319+K14293+K18213+K07936
Fructose and mannose metabolism	ko00051	10	87	457	6982	Potri.001G468100;Potri.002G069000;Potri.004G162400;Potri.005G116200;Potri.005G191400;Potri.006G152600;Potri.007G015500;Potri.009G124100;Potri.011G165000;Potri.017G029000	K01623+K03841+K01623+K01711+K03841+K00850+K01623+K01623+K01623+K00847
alpha-Linolenic acid metabolism	ko00592	4	71	457	6982	Potri.005G077600;Potri.009G109700;Potri.014G038700;Potri.T107200	K00232+K01723+K01723+K18857
Sulfur metabolism	ko00920	1	53	457	6982	Potri.019G045800	K01738
Alanine, aspartate and glutamate metabolism	ko00250	4	71	457	6982	Potri.008G187400;Potri.009G047700;Potri.010G029100;Potri.016G132200	K14272+K00830+K01915+K00827
Circadian rhythm - plant	ko04712	11	59	457	6982	Potri.002G180800;Potri.003G176900;Potri.004G002700;Potri.005G175200;Potri.008G135200;Potri.010G105700;Potri.012G005900;Potri.012G138800;Potri.014G106800;Potri.014G111400;Potri.014G145100	K12133+K00660+K10143+K00660+K12116+K12116+K12130+K00660+K12133+K12126+K00660
Carbon metabolism	ko01200	39	392	457	6982	Potri.001G134000;Potri.001G394400;Potri.001G468100;Potri.002G007100;Potri.002G069000;Potri.002G214100;Potri.002G214800;Potri.002G220400;Potri.003G040800;Potri.004G100000;Potri.004G162400;Potri.004G175800;Potri.005G100400;Potri.005G191400;Potri.005G254100;Potri.006G152600;Potri.006G186800;Potri.006G229300;Potri.007G015500;Potri.008G031700;Potri.008G077400;Potri.008G187400;Potri.009G047700;Potri.00…	K00855+K11517+K01623+K05298+K03841+K01595+K05298+K05298+K18121+K01602+K01623+K15893+K03781+K03841+K05298+K00850+K00131+K00281+K01623+K00051+K19269+K14272+K00830+K01623+K01006+K00134+K19269+K00605+K01623+K00873+K05298+K00036+K01057+K01637+K01602+K05605+K00131+K00121+K01738
Glycerolipid metabolism	ko00561	6	83	457	6982	Potri.002G133100;Potri.006G097800;Potri.008G058200;Potri.009G054500;Potri.010G201200;Potri.012G041800	K13513+K13508+K13508+K13523+K13508+K01054
Protein export	ko03060	1	75	457	6982	Potri.001G237800	K03217
Riboflavin metabolism	ko00740	2	16	457	6982	Potri.001G234900;Potri.017G050400	K14652+K14652
Regulation of autophagy	ko04140	1	48	457	6982	Potri.001G024600	K08332
Starch and sucrose metabolism	ko00500	55	351	457	6982	Potri.001G015100;Potri.001G087100;Potri.001G162400;Potri.001G162500;Potri.001G162600;Potri.001G222900;Potri.001G225900;Potri.001G226100;Potri.001G237200;Potri.001G346800;Potri.001G416800;Potri.002G033400;Potri.002G200300;Potri.003G001900;Potri.003G002100;Potri.003G002600;Potri.003G002800;Potri.003G022900;Potri.003G112600;Potri.004G081300;Potri.004G118600;Potri.004G162200;Potri.005G022700;Potri.00…	K01188+K01194+K01051+K01051+K01051+K01188+K01188+K01188+K08678+K01184+K20867+K00975+K00770+K01051+K01051+K01051+K01051+K15920+K01193+K00695+K00012+K01179+K01051+K00700+K00695+K08679+K01051+K01051+K00012+K00975+K01177+K08678+K01051+K20867+K01051+K01187+K01213+K00695+K16055+K01087+K01051+K00975+K00770+K01051+K00695+K01051+K00705+K00847+K00696+K00695+K01179+K01051+K01051+K01051+K01051
Porphyrin and chlorophyll metabolism	ko00860	5	68	457	6982	Potri.001G403300;Potri.002G083200;Potri.005G214200;Potri.006G051100;Potri.011G122400	K00218+K13600+K08099+K03403+K00218
Base excision repair	ko03410	4	61	457	6982	Potri.008G112300;Potri.010G137300;Potri.012G039300;Potri.014G041700	K01246+K01246+K02325+K01246
Pyrimidine metabolism	ko00240	7	168	457	6982	Potri.002G222300;Potri.002G250000;Potri.012G039300;Potri.013G142200;Potri.017G071200;Potri.019G031200;Potri.019G040100	K00857+K16904+K02325+K03043+K00876+K14641+K00962
Glycosaminoglycan degradation	ko00531	1	20	457	6982	Potri.009G136700	K10532
Protein processing in endoplasmic reticulum	ko04141	18	314	457	6982	Potri.001G070600;Potri.001G430200;Potri.003G109200;Potri.004G073600;Potri.004G187200;Potri.004G187400;Potri.006G223900;Potri.008G062300;Potri.009G039200;Potri.009G049900;Potri.009G147900;Potri.009G148000;Potri.011G089100;Potri.013G089200;Potri.017G130700;Potri.017G146600;Potri.018G140600;Potri.019G081200	K08054+K13719+K13993+K04079+K13993+K13993+K13993+K13993+K13993+K13993+K13993+K13993+K14009+K13993+K13993+K04079+K13993+K13993
Cysteine and methionine metabolism	ko00270	13	150	457	6982	Potri.001G009600;Potri.001G084000;Potri.002G078600;Potri.002G189200;Potri.003G187000;Potri.004G106800;Potri.005G182700;Potri.006G151600;Potri.008G157400;Potri.014G012600;Potri.016G132200;Potri.017G108800;Potri.019G045800	K00558+K01761+K05933+K00789+K01761+K01611+K05933+K05933+K08967+K01762+K00827+K01611+K01738
Galactose metabolism	ko00052	12	84	457	6982	Potri.002G193700;Potri.003G112600;Potri.004G129700;Potri.006G152600;Potri.008G189400;Potri.010G150400;Potri.011G154500;Potri.013G005800;Potri.013G005900;Potri.014G118400;Potri.017G080000;Potri.018G126400	K06611+K01193+K01785+K00850+K18819+K18819+K01187+K18819+K18819+K06611+K01785+K06617
Biotin metabolism	ko00780	2	26	457	6982	Potri.013G059000;Potri.016G046700	K00059+K00208
Glyoxylate and dicarboxylate metabolism	ko00630	15	121	457	6982	Potri.001G144800;Potri.001G394400;Potri.003G040800;Potri.004G100000;Potri.004G175800;Potri.005G100400;Potri.006G229300;Potri.008G077400;Potri.008G187400;Potri.009G047700;Potri.010G029100;Potri.010G180400;Potri.011G006800;Potri.017G036900;Potri.017G114600	K02437+K11517+K18121+K01602+K15893+K03781+K00281+K19269+K14272+K00830+K01915+K19269+K00605+K01637+K01602
Butanoate metabolism	ko00650	1	31	457	6982	Potri.003G040800	K18121
Photosynthesis - antenna proteins	ko00196	2	27	457	6982	Potri.008G041000;Potri.014G029700	K08907+K08911
Monoterpenoid biosynthesis	ko00902	2	13	457	6982	Potri.004G235600;Potri.014G080100	K15095+K15095
Valine, leucine and isoleucine degradation	ko00280	3	74	457	6982	Potri.005G185400;Potri.016G132200;Potri.018G004100	K00166+K00827+K05605
Terpenoid backbone biosynthesis	ko00900	5	87	457	6982	Potri.001G380500;Potri.001G457000;Potri.004G104800;Potri.009G169900;Potri.017G041700	K05356+K00021+K15889+K00021+K12742
Fatty acid degradation	ko00071	4	62	457	6982	Potri.001G321800;Potri.005G077600;Potri.018G142700;Potri.T107200	K01897+K00232+K00121+K18857
Mismatch repair	ko03430	2	73	457	6982	Potri.010G239200;Potri.015G057300	K10740+K07466
Aminoacyl-tRNA biosynthesis	ko00970	2	76	457	6982	Potri.011G009600;Potri.014G048500	K01869+K14164
Phenylpropanoid biosynthesis	ko00940	40	286	457	6982	Potri.001G011000;Potri.001G011200;Potri.001G011300;Potri.001G015100;Potri.001G222900;Potri.001G225900;Potri.001G226100;Potri.002G018000;Potri.004G017600;Potri.004G102000;Potri.004G144600;Potri.005G028000;Potri.005G028100;Potri.005G072800;Potri.005G108900;Potri.005G117500;Potri.006G126800;Potri.006G129900;Potri.006G199100;Potri.006G267400;Potri.007G016400;Potri.007G019300;Potri.007G122100;Potri.00…	K00430+K00430+K00430+K01188+K01188+K01188+K01188+K00430+K13065+K01904+K00430+K13065+K13065+K00430+K00430+K09755+K10775+K00430+K00083+K00430+K09755+K00430+K00430+K00430+K00588+K00430+K00430+K10775+K00430+K13066+K00430+K00430+K00430+K01904+K00430+K13065+K13065+K13065+K13065+K01904
Brassinosteroid biosynthesis	ko00905	3	27	457	6982	Potri.001G200100;Potri.005G124000;Potri.017G099000	K12638+K09587+K12640
Glycerophospholipid metabolism	ko00564	9	131	457	6982	Potri.002G133100;Potri.003G032800;Potri.006G097800;Potri.006G253900;Potri.008G058200;Potri.009G054500;Potri.010G201200;Potri.013G073600;Potri.014G014400	K13513+K01115+K13508+K01115+K13508+K13523+K13508+K01114+K06129
Purine metabolism	ko00230	11	207	457	6982	Potri.001G150800;Potri.001G443000;Potri.001G443100;Potri.012G002500;Potri.012G039300;Potri.013G043500;Potri.013G142200;Potri.015G093200;Potri.018G113400;Potri.019G031200;Potri.019G040100	K14977+K01514+K01514+K00873+K02325+K11808+K03043+K00939+K00939+K14641+K00962
Glycine, serine and threonine metabolism	ko00260	9	99	457	6982	Potri.001G118300;Potri.001G144800;Potri.004G175800;Potri.006G229300;Potri.008G187400;Potri.009G047700;Potri.010G089000;Potri.011G006800;Potri.016G132200	K00276+K02437+K15893+K00281+K14272+K00830+K00276+K00605+K00827
Fatty acid elongation	ko00062	4	52	457	6982	Potri.001G234500;Potri.008G160000;Potri.010G012500;Potri.013G015100	K15397+K15397+K15397+K15397
AGE-RAGE signaling pathway in diabetic complications	ko04933	4	20	457	6982	Potri.008G068300;Potri.011G061500;Potri.014G051800;Potri.019G092300	K05857+K04392+K04392+K04392
Basal transcription factors	ko03022	1	61	457	6982	Potri.010G219800	K03139
Pyruvate metabolism	ko00620	7	126	457	6982	Potri.002G214100;Potri.004G075900;Potri.004G076000;Potri.004G076200;Potri.008G031700;Potri.010G027800;Potri.012G002500	K01595+K18881+K18881+K18881+K00051+K01006+K00873
Valine, leucine and isoleucine biosynthesis	ko00290	1	23	457	6982	Potri.008G172500	K01703
Ribosome biogenesis in eukaryotes	ko03008	1	116	457	6982	Potri.018G030700	K07936
Ether lipid metabolism	ko00565	3	41	457	6982	Potri.003G032800;Potri.006G253900;Potri.013G073600	K01115+K01115+K01114
Ribosome	ko03010	3	500	457	6982	Potri.003G067400;Potri.010G005000;Potri.T033700	K02913+K02881+K02871
Oxidative phosphorylation	ko00190	5	196	457	6982	Potri.006G188600;Potri.013G138800;Potri.019G045000;Potri.T074500;Potri.T091100	K01535+K05573+K05577+K05577+K02115
Zeatin biosynthesis	ko00908	6	23	457	6982	Potri.002G030500;Potri.006G047200;Potri.006G048200;Potri.008G121500;Potri.014G139300;Potri.016G044100	K00279+K13495+K13495+K10760+K10760+K00279
RNA degradation	ko03018	3	151	457	6982	Potri.006G152600;Potri.018G146000;Potri.019G040100	K00850+K12598+K00962
2-Oxocarboxylic acid metabolism	ko01210	3	79	457	6982	Potri.008G172500;Potri.008G187400;Potri.018G001600	K01703+K14272+K00930
Nucleotide excision repair	ko03420	3	100	457	6982	Potri.010G239200;Potri.012G039300;Potri.015G057300	K10740+K02325+K07466
Diterpenoid biosynthesis	ko00904	6	34	457	6982	Potri.002G151300;Potri.003G057400;Potri.004G022800;Potri.010G149700;Potri.013G125300;Potri.014G073700	K05282+K04124+K04125+K04125+K17961+K05282
RNA polymerase	ko03020	1	53	457	6982	Potri.013G142200	K03043
Arginine biosynthesis	ko00220	3	55	457	6982	Potri.008G187400;Potri.010G029100;Potri.018G001600	K14272+K01915+K00930

## Sheet: 0 h vs_24 h.KEGG_enrichm
#KEGG_n	320	KEGG_N	6982
#Pathway	ko_ID	DEgene	gene	DEgene_all	gene_all
Stilbenoid, diarylheptanoid and gingerol biosynthesis	ko00945	10	38	320	6982	Potri.003G183900;Potri.004G017600;Potri.005G028000;Potri.005G028100;Potri.008G033500;Potri.009G099800;Potri.016G031100;Potri.018G105400;Potri.018G105500;Potri.019G001200	K13065+K13065+K13065+K13065+K13065+K00588+K09754+K13065+K13065+K13065
Plant hormone signal transduction	ko04075	18	402	320	6982	Potri.001G027000;Potri.001G069000;Potri.001G092100;Potri.002G127100;Potri.002G213100;Potri.003G161300;Potri.004G165600;Potri.006G137200;Potri.006G278100;Potri.007G050300;Potri.008G166200;Potri.009G037300;Potri.010G027100;Potri.010G037800;Potri.012G002700;Potri.014G111400;Potri.019G103500;Potri.T063000	K14492+K14487+K14497+K14499+K14493+K14487+K14488+K14488+K14488+K14487+K14516+K14497+K14490+K14492+K14497+K12126+K14487+K14497
Brassinosteroid biosynthesis	ko00905	2	27	320	6982	Potri.005G124000;Potri.017G099000	K09587+K12640
Sphingolipid metabolism	ko00600	1	40	320	6982	Potri.005G199900	K04713
Fatty acid metabolism	ko01212	4	105	320	6982	Potri.001G012500;Potri.012G101500;Potri.015G099600;Potri.T082100	K10256+K10781+K10781+K10781
AGE-RAGE signaling pathway in diabetic complications	ko04933	3	20	320	6982	Potri.011G061500;Potri.014G051800;Potri.019G092300	K04392+K04392+K04392
Spliceosome	ko03040	2	282	320	6982	Potri.008G085100;Potri.010G157000	K12824+K09564
Fatty acid degradation	ko00071	2	62	320	6982	Potri.018G142700;Potri.T107200	K00121+K18857
Diterpenoid biosynthesis	ko00904	4	34	320	6982	Potri.002G151300;Potri.004G022800;Potri.004G106600;Potri.013G125300	K05282+K04125+K17961+K17961
Flavonoid biosynthesis	ko00941	10	70	320	6982	Potri.003G183900;Potri.004G017600;Potri.005G028000;Potri.005G028100;Potri.008G033500;Potri.009G099800;Potri.016G031100;Potri.018G105400;Potri.018G105500;Potri.019G001200	K13065+K13065+K13065+K13065+K13065+K00588+K09754+K13065+K13065+K13065
RNA degradation	ko03018	1	151	320	6982	Potri.019G040100	K00962
Starch and sucrose metabolism	ko00500	36	351	320	6982	Potri.001G087100;Potri.001G222900;Potri.001G225900;Potri.001G226100;Potri.001G237200;Potri.001G346800;Potri.001G416800;Potri.002G033400;Potri.002G145700;Potri.002G200300;Potri.003G022900;Potri.003G112600;Potri.004G118600;Potri.004G162200;Potri.005G059500;Potri.006G136700;Potri.006G256600;Potri.006G256700;Potri.008G094300;Potri.010G062900;Potri.010G159900;Potri.010G247700;Potri.011G132600;Potri.01…	K01194+K01188+K01188+K01188+K08678+K01184+K20867+K00975+K01051+K00770+K15920+K01193+K00012+K01179+K01188+K00695+K01051+K01051+K00012+K01177+K01188+K01051+K20867+K01051+K01187+K01213+K01087+K00770+K01051+K01051+K01179+K00705+K00696+K01051+K01179+K01051
Phagosome	ko04145	10	120	320	6982	Potri.001G106100;Potri.001G272700;Potri.001G272800;Potri.002G111900;Potri.005G239900;Potri.009G040200;Potri.011G061500;Potri.014G051800;Potri.017G081000;Potri.019G092300	K07375+K07375+K07375+K07374+K07375+K07375+K04392+K04392+K07374+K04392
Biosynthesis of amino acids	ko01230	13	343	320	6982	Potri.001G468100;Potri.004G162400;Potri.005G073300;Potri.007G015500;Potri.008G172500;Potri.008G187400;Potri.009G124100;Potri.011G165000;Potri.012G002500;Potri.013G060400;Potri.014G135500;Potri.017G014200;Potri.T107000	K01623+K01623+K01626+K01623+K01703+K14272+K01623+K01623+K00873+K00873+K13832+K00815+K13832
Pentose phosphate pathway	ko00030	7	87	320	6982	Potri.001G468100;Potri.002G069000;Potri.004G162400;Potri.007G015500;Potri.009G124100;Potri.011G165000;Potri.018G109700	K01623+K03841+K01623+K01623+K01623+K01623+K00131
Base excision repair	ko03410	3	61	320	6982	Potri.008G112300;Potri.010G137300;Potri.014G041700	K01246+K01246+K01246
Carbon fixation in photosynthetic organisms	ko00710	15	113	320	6982	Potri.001G134000;Potri.001G468100;Potri.002G069000;Potri.002G141700;Potri.002G214800;Potri.002G220400;Potri.004G100000;Potri.004G162400;Potri.005G254100;Potri.007G015500;Potri.008G187400;Potri.009G124100;Potri.010G027800;Potri.011G165000;Potri.014G140500	K00855+K01623+K03841+K00025+K05298+K05298+K01602+K01623+K05298+K01623+K14272+K01623+K01006+K01623+K05298
Steroid biosynthesis	ko00100	2	51	320	6982	Potri.018G148800;Potri.T126100	K01853+K01853
Valine, leucine and isoleucine degradation	ko00280	3	74	320	6982	Potri.005G185400;Potri.006G106800;Potri.018G004100	K00166+K00827+K05605
Propanoate metabolism	ko00640	2	59	320	6982	Potri.005G185400;Potri.018G004100	K00166+K05605
Photosynthesis - antenna proteins	ko00196	1	27	320	6982	Potri.008G041000	K08907
Alanine, aspartate and glutamate metabolism	ko00250	3	71	320	6982	Potri.006G106800;Potri.008G187400;Potri.009G047700	K00827+K14272+K00830
Glycerophospholipid metabolism	ko00564	4	131	320	6982	Potri.002G133100;Potri.006G097800;Potri.008G058200;Potri.010G201200	K13513+K13508+K13508+K13508
Amino sugar and nucleotide sugar metabolism	ko00520	14	203	320	6982	Potri.001G237200;Potri.001G416800;Potri.002G033400;Potri.002G200300;Potri.003G022900;Potri.004G118600;Potri.008G094300;Potri.009G141700;Potri.011G132600;Potri.011G156100;Potri.012G033900;Potri.014G092800;Potri.014G125100;Potri.019G093800	K08678+K20867+K00975+K00770+K15920+K00012+K00012+K20547+K20867+K12448+K01183+K01183+K00770+K01183
Valine, leucine and isoleucine biosynthesis	ko00290	1	23	320	6982	Potri.008G172500	K01703
Tyrosine metabolism	ko00350	7	88	320	6982	Potri.001G388900;Potri.004G156500;Potri.010G089000;Potri.017G014200;Potri.018G142700;Potri.T091800;Potri.T107200	K00422+K00422+K00276+K00815+K00121+K07253+K18857
Endocytosis	ko04144	4	242	320	6982	Potri.007G059800;Potri.008G170800;Potri.010G067100;Potri.010G127000	K19476+K05758+K05758+K19476
Thiamine metabolism	ko00730	4	24	320	6982	Potri.001G249200;Potri.004G020500;Potri.006G173500;Potri.011G025200	K03147+K03146+K01662+K03146
Butanoate metabolism	ko00650	1	31	320	6982	Potri.003G040800	K18121
Porphyrin and chlorophyll metabolism	ko00860	3	68	320	6982	Potri.002G083200;Potri.006G051100;Potri.011G122400	K13600+K03403+K00218
Carbon metabolism	ko01200	28	392	320	6982	Potri.001G134000;Potri.001G394400;Potri.001G468100;Potri.002G069000;Potri.002G141700;Potri.002G214800;Potri.002G220400;Potri.003G040800;Potri.004G100000;Potri.004G162400;Potri.004G175800;Potri.005G100400;Potri.005G254100;Potri.007G015500;Potri.007G122900;Potri.008G187400;Potri.009G047700;Potri.009G124100;Potri.010G027800;Potri.010G180400;Potri.011G165000;Potri.012G002500;Potri.013G060400;Potri.01…	K00855+K11517+K01623+K03841+K00025+K05298+K05298+K18121+K01602+K01623+K15893+K03781+K05298+K01623+K01637+K14272+K00830+K01623+K01006+K19269+K01623+K00873+K00873+K05298+K01637+K05605+K00131+K00121
Plant-pathogen interaction	ko04626	5	291	320	6982	Potri.005G245000;Potri.006G137300;Potri.007G127000;Potri.012G111600;Potri.T013900	K13412+K13447+K13412+K13447+K13459
Glycolysis / Gluconeogenesis	ko00010	12	180	320	6982	Potri.001G468100;Potri.002G069000;Potri.004G129700;Potri.004G162400;Potri.007G015500;Potri.009G124100;Potri.011G165000;Potri.012G002500;Potri.013G060400;Potri.018G109700;Potri.018G142700;Potri.T107200	K01623+K03841+K01785+K01623+K01623+K01623+K01623+K00873+K00873+K00131+K00121+K18857
Ubiquitin mediated proteolysis	ko04120	5	175	320	6982	Potri.001G254500;Potri.009G049600;Potri.010G206800;Potri.013G048900;Potri.019G021800	K06688+K06688+K10575+K03363+K03363
Oxidative phosphorylation	ko00190	4	196	320	6982	Potri.003G080500;Potri.006G188600;Potri.013G138800;Potri.T074500	K01535+K01535+K05573+K05577
Fatty acid elongation	ko00062	3	52	320	6982	Potri.008G120300;Potri.010G012500;Potri.013G015100	K15397+K15397+K15397
Galactose metabolism	ko00052	10	84	320	6982	Potri.002G191600;Potri.002G193700;Potri.003G112600;Potri.004G129700;Potri.008G189400;Potri.010G150400;Potri.011G154500;Potri.013G005900;Potri.014G116800;Potri.018G126400	K18819+K06611+K01193+K01785+K18819+K18819+K01187+K18819+K18819+K06617
Mismatch repair	ko03430	2	73	320	6982	Potri.010G239200;Potri.015G057300	K10740+K07466
Pantothenate and CoA biosynthesis	ko00770	1	39	320	6982	Potri.001G273500	K01464
Isoquinoline alkaloid biosynthesis	ko00950	4	53	320	6982	Potri.001G388900;Potri.004G156500;Potri.010G089000;Potri.017G014200	K00422+K00422+K00276+K00815
Selenocompound metabolism	ko00450	1	24	320	6982	Potri.001G084000	K01761
Biosynthesis of unsaturated fatty acids	ko01040	1	42	320	6982	Potri.001G012500	K10256
Phenylalanine, tyrosine and tryptophan biosynthesis	ko00400	4	77	320	6982	Potri.005G073300;Potri.014G135500;Potri.017G014200;Potri.T107000	K01626+K13832+K00815+K13832
Glyoxylate and dicarboxylate metabolism	ko00630	12	121	320	6982	Potri.001G144800;Potri.001G394400;Potri.002G141700;Potri.003G040800;Potri.004G100000;Potri.004G175800;Potri.005G100400;Potri.007G122900;Potri.008G187400;Potri.009G047700;Potri.010G180400;Potri.017G036900	K02437+K11517+K00025+K18121+K01602+K15893+K03781+K01637+K14272+K00830+K19269+K01637
Tropane, piperidine and pyridine alkaloid biosynthesis	ko00960	3	46	320	6982	Potri.006G089800;Potri.010G089000;Potri.017G014200	K08081+K00276+K00815
Fructose and mannose metabolism	ko00051	6	87	320	6982	Potri.001G468100;Potri.002G069000;Potri.004G162400;Potri.007G015500;Potri.009G124100;Potri.011G165000	K01623+K03841+K01623+K01623+K01623+K01623
Ascorbate and aldarate metabolism	ko00053	3	55	320	6982	Potri.004G118600;Potri.008G094300;Potri.008G144500	K00012+K00012+K00469
Fatty acid biosynthesis	ko00061	3	65	320	6982	Potri.012G101500;Potri.015G099600;Potri.T082100	K10781+K10781+K10781
Cyanoamino acid metabolism	ko00460	5	81	320	6982	Potri.001G222900;Potri.001G225900;Potri.001G226100;Potri.005G059500;Potri.010G159900	K01188+K01188+K01188+K01188+K01188
Peroxisome	ko04146	9	134	320	6982	Potri.001G394400;Potri.001G404600;Potri.004G185000;Potri.004G185100;Potri.005G100400;Potri.006G272800;Potri.009G047700;Potri.009G144900;Potri.009G145000	K11517+K13348+K13356+K13356+K03781+K00306+K00830+K13356+K13356
2-Oxocarboxylic acid metabolism	ko01210	2	79	320	6982	Potri.008G172500;Potri.008G187400	K01703+K14272
Other types of O-glycan biosynthesis	ko00514	1	8	320	6982	Potri.008G092700	K18134
Riboflavin metabolism	ko00740	2	16	320	6982	Potri.001G234900;Potri.017G050400	K14652+K14652
Other glycan degradation	ko00511	1	31	320	6982	Potri.007G056300	K01191
Pyrimidine metabolism	ko00240	6	168	320	6982	Potri.001G273500;Potri.002G222300;Potri.002G250000;Potri.013G142200;Potri.015G096400;Potri.019G040100	K01464+K00857+K16904+K03043+K01493+K00962
Pentose and glucuronate interconversions	ko00040	17	160	320	6982	Potri.001G339500;Potri.001G346800;Potri.002G145700;Potri.003G175900;Potri.004G118600;Potri.006G122000;Potri.006G256600;Potri.006G256700;Potri.008G094300;Potri.010G247700;Potri.011G135000;Potri.011G159000;Potri.012G091300;Potri.014G127000;Potri.015G127800;Potri.018G068400;Potri.T148200	K01728+K01184+K01051+K01728+K00012+K01728+K01051+K01051+K00012+K01051+K01051+K01213+K01728+K01051+K01051+K01051+K01051
Protein processing in endoplasmic reticulum	ko04141	6	314	320	6982	Potri.004G187400;Potri.006G093500;Potri.006G223900;Potri.009G148000;Potri.010G206800;Potri.018G140600	K13993+K13993+K13993+K13993+K10575+K13993
Circadian rhythm - plant	ko04712	6	59	320	6982	Potri.002G180800;Potri.008G135200;Potri.010G105700;Potri.012G005900;Potri.014G106800;Potri.014G111400	K12133+K12116+K12116+K12130+K12133+K12126
Vitamin B6 metabolism	ko00750	1	15	320	6982	Potri.016G116400	K06215
Arginine and proline metabolism	ko00330	2	79	320	6982	Potri.004G106800;Potri.007G052600	K01611+K00472
DNA replication	ko03030	2	90	320	6982	Potri.010G239200;Potri.015G057300	K10740+K07466
RNA polymerase	ko03020	1	53	320	6982	Potri.013G142200	K03043
Phenylalanine metabolism	ko00360	9	80	320	6982	Potri.004G102000;Potri.009G099800;Potri.010G089000;Potri.010G224100;Potri.017G014200;Potri.017G112800;Potri.019G049500;Potri.T071600;Potri.T091800	K01904+K00588+K00276+K10775+K00815+K01904+K01904+K01904+K07253
beta-Alanine metabolism	ko00410	3	73	320	6982	Potri.001G273500;Potri.010G089000;Potri.018G004100	K01464+K00276+K05605
Nucleotide excision repair	ko03420	2	100	320	6982	Potri.010G239200;Potri.015G057300	K10740+K07466
Glycine, serine and threonine metabolism	ko00260	7	99	320	6982	Potri.001G144800;Potri.004G175800;Potri.006G106800;Potri.006G272800;Potri.008G187400;Potri.009G047700;Potri.010G089000	K02437+K15893+K00827+K00306+K14272+K00830+K00276
Aminoacyl-tRNA biosynthesis	ko00970	1	76	320	6982	Potri.014G048500	K14164
Photosynthesis	ko00195	8	147	320	6982	Potri.001G416400;Potri.001G438600;Potri.001G438700;Potri.001G438800;Potri.001G470700;Potri.002G256400;Potri.010G166800;Potri.011G142200	K08901+K03541+K03541+K03541+K02639+K08903+K08901+K03541
Glutathione metabolism	ko00480	6	158	320	6982	Potri.011G113400;Potri.013G137200;Potri.019G130500;Potri.019G130600;Potri.T035300;Potri.T178900	K00799+K00799+K00799+K00799+K00799+K00799
Terpenoid backbone biosynthesis	ko00900	4	87	320	6982	Potri.004G104800;Potri.006G173500;Potri.009G169900;Potri.017G041700	K15889+K01662+K00021+K12742
C5-Branched dibasic acid metabolism	ko00660	1	9	320	6982	Potri.008G172500	K01703
Pyruvate metabolism	ko00620	5	126	320	6982	Potri.002G141700;Potri.004G075900;Potri.010G027800;Potri.012G002500;Potri.013G060400	K00025+K18881+K01006+K00873+K00873
Tryptophan metabolism	ko00380	2	52	320	6982	Potri.002G254200;Potri.005G100400	K11816+K03781
Zeatin biosynthesis	ko00908	3	23	320	6982	Potri.005G232300;Potri.008G121500;Potri.016G044100	K00279+K10760+K00279
Cutin, suberine and wax biosynthesis	ko00073	10	39	320	6982	Potri.001G249700;Potri.001G326300;Potri.004G185000;Potri.004G185100;Potri.005G092200;Potri.007G072100;Potri.009G043700;Potri.009G144900;Potri.009G145000;Potri.014G180300	K15401+K15400+K13356+K13356+K15402+K15402+K15401+K13356+K13356+K15404
Homologous recombination	ko03440	3	72	320	6982	Potri.006G135200;Potri.010G239200;Potri.015G057300	K04482+K10740+K07466
Lysine degradation	ko00310	2	40	320	6982	Potri.006G272800;Potri.014G143900	K00306+K11420
Nitrogen metabolism	ko00910	5	53	320	6982	Potri.001G348300;Potri.001G348900;Potri.009G008600;Potri.009G010200;Potri.016G079600	K02575+K01673+K02575+K01674+K01674
Inositol phosphate metabolism	ko00562	3	86	320	6982	Potri.005G078700;Potri.007G089000;Potri.008G144500	K01858+K01858+K00469
SNARE interactions in vesicular transport	ko04130	3	56	320	6982	Potri.002G041500;Potri.011G043700;Potri.013G053200	K08504+K08486+K08486
Carotenoid biosynthesis	ko00906	9	61	320	6982	Potri.001G242600;Potri.001G393800;Potri.002G056800;Potri.002G126100;Potri.004G074000;Potri.005G138400;Potri.007G044300;Potri.009G033900;Potri.011G112400	K09843+K09840+K02291+K09843+K15746+K09838+K09838+K09843+K09840
Phenylpropanoid biosynthesis	ko00940	45	286	320	6982	Potri.001G222900;Potri.001G225900;Potri.001G226100;Potri.002G018000;Potri.002G180600;Potri.003G183900;Potri.004G017600;Potri.004G102000;Potri.004G144600;Potri.005G028000;Potri.005G028100;Potri.005G059500;Potri.005G072800;Potri.005G108900;Potri.005G117500;Potri.006G129900;Potri.006G199100;Potri.006G267400;Potri.007G016400;Potri.007G053400;Potri.007G132800;Potri.008G033500;Potri.009G062800;Potri.00…	K01188+K01188+K01188+K00430+K13066+K13065+K13065+K01904+K00430+K13065+K13065+K01188+K00430+K00430+K09755+K00430+K00083+K00430+K09755+K00430+K00430+K13065+K00083+K00083+K00083+K00588+K00430+K00430+K01188+K10775+K00430+K00430+K13066+K13066+K00430+K00430+K09754+K00430+K01904+K00430+K13065+K13065+K13065+K01904+K01904
Glycerolipid metabolism	ko00561	6	83	320	6982	Potri.002G133100;Potri.006G097800;Potri.008G058200;Potri.010G201200;Potri.012G041800;Potri.015G031900	K13513+K13508+K13508+K13508+K01054+K01054
Anthocyanin biosynthesis	ko00942	1	2	320	6982	Potri.013G118700	K12930
Citrate cycle (TCA cycle)	ko00020	1	83	320	6982	Potri.002G141700	K00025
ABC transporters	ko02010	1	43	320	6982	Potri.003G182900	K05674
RNA transport	ko03013	2	250	320	6982	Potri.004G168700;Potri.006G103300	K14311+K14293
Arginine biosynthesis	ko00220	1	55	320	6982	Potri.008G187400	K14272
Ubiquinone and other terpenoid-quinone biosynthesis	ko00130	7	60	320	6982	Potri.004G102000;Potri.008G159400;Potri.012G070000;Potri.017G014200;Potri.017G112800;Potri.019G049500;Potri.T071600	K01904+K12502+K02552+K00815+K01904+K01904+K01904
Purine metabolism	ko00230	7	207	320	6982	Potri.001G443100;Potri.012G002500;Potri.013G060400;Potri.013G142200;Potri.015G093200;Potri.018G113400;Potri.019G040100	K01514+K00873+K00873+K03043+K00939+K00939+K00962
Ribosome	ko03010	4	500	320	6982	Potri.003G007700;Potri.003G008300;Potri.013G139000;Potri.T033700	K02925+K02925+K02950+K02871
Linoleic acid metabolism	ko00591	2	25	320	6982	Potri.001G015600;Potri.017G046200	K00454+K00454
alpha-Linolenic acid metabolism	ko00592	3	71	320	6982	Potri.001G015600;Potri.017G046200;Potri.T107200	K00454+K00454+K18857
Sesquiterpenoid and triterpenoid biosynthesis	ko00909	1	29	320	6982	Potri.007G002100	K15813
Cysteine and methionine metabolism	ko00270	10	150	320	6982	Potri.001G084000;Potri.001G099400;Potri.002G078600;Potri.002G141700;Potri.004G106800;Potri.005G182700;Potri.006G106800;Potri.007G007800;Potri.014G012600;Potri.017G014200	K01761+K20772+K05933+K00025+K01611+K05933+K00827+K01762+K01762+K00815

## Sheet: 0 h vs_48 h.KEGG_enrichm
#KEGG_n	279	KEGG_N	6982
#Pathway	ko_ID	DEgene	gene	DEgene_all	gene_all
Linoleic acid metabolism	ko00591	1	25	279	6982	Potri.006G070400	K01047
Anthocyanin biosynthesis	ko00942	1	2	279	6982	Potri.013G118700	K12930
Phenylalanine, tyrosine and tryptophan biosynthesis	ko00400	2	77	279	6982	Potri.005G162800;Potri.017G014200	K01626+K00815
Tyrosine metabolism	ko00350	6	88	279	6982	Potri.001G118300;Potri.001G388900;Potri.004G156500;Potri.010G089000;Potri.017G014200;Potri.T062200	K00276+K00422+K00422+K00276+K00815+K00422
Ascorbate and aldarate metabolism	ko00053	6	55	279	6982	Potri.001G167100;Potri.004G118600;Potri.005G112200;Potri.008G094300;Potri.016G011000;Potri.018G069700	K14085+K00012+K00434+K00012+K10047+K00469
Pentose phosphate pathway	ko00030	5	87	279	6982	Potri.001G225700;Potri.002G069000;Potri.006G094400;Potri.011G165000;Potri.T115200	K01807+K03841+K03841+K01623+K01783
Biotin metabolism	ko00780	3	26	279	6982	Potri.003G142000;Potri.016G046700;Potri.018G062900	K09458+K00208+K09458
Alanine, aspartate and glutamate metabolism	ko00250	1	71	279	6982	Potri.009G072900	K01953
Brassinosteroid biosynthesis	ko00905	1	27	279	6982	Potri.017G099000	K12640
Fatty acid degradation	ko00071	2	62	279	6982	Potri.001G167100;Potri.019G092600	K14085+K00232
Stilbenoid, diarylheptanoid and gingerol biosynthesis	ko00945	3	38	279	6982	Potri.004G017600;Potri.005G028000;Potri.005G028100	K13065+K13065+K13065
Terpenoid backbone biosynthesis	ko00900	2	87	279	6982	Potri.004G104800;Potri.017G041700	K15889+K12742
Cyanoamino acid metabolism	ko00460	5	81	279	6982	Potri.001G015100;Potri.001G222900;Potri.001G225900;Potri.001G226100;Potri.005G059500	K01188+K01188+K01188+K01188+K01188
Thiamine metabolism	ko00730	3	24	279	6982	Potri.001G249200;Potri.004G020500;Potri.011G025200	K03147+K03146+K03146
AGE-RAGE signaling pathway in diabetic complications	ko04933	1	20	279	6982	Potri.014G051800	K04392
Propanoate metabolism	ko00640	4	59	279	6982	Potri.001G122400;Potri.005G185400;Potri.011G010400;Potri.018G004100	K00016+K00166+K01578+K05605
Phenylpropanoid biosynthesis	ko00940	23	286	279	6982	Potri.001G011300;Potri.001G015100;Potri.001G222900;Potri.001G225900;Potri.001G226100;Potri.002G018000;Potri.004G017600;Potri.004G102000;Potri.004G144600;Potri.005G028000;Potri.005G028100;Potri.005G059500;Potri.006G267400;Potri.007G019300;Potri.007G122100;Potri.009G062800;Potri.009G063100;Potri.010G134500;Potri.013G154400;Potri.014G143200;Potri.015G003500;Potri.015G003600;Potri.017G112800	K00430+K01188+K01188+K01188+K01188+K00430+K13065+K01904+K00430+K13065+K13065+K01188+K00430+K00430+K00430+K00083+K00083+K00430+K00430+K00430+K00430+K00430+K01904
Nicotinate and nicotinamide metabolism	ko00760	1	29	279	6982	Potri.010G113500	K00767
Cysteine and methionine metabolism	ko00270	10	150	279	6982	Potri.001G084000;Potri.001G122400;Potri.002G078600;Potri.002G141700;Potri.003G190600;Potri.005G182700;Potri.006G151600;Potri.007G007800;Potri.010G153500;Potri.017G014200	K01761+K00016+K05933+K00025+K01761+K05933+K05933+K01762+K00789+K00815
Pyruvate metabolism	ko00620	7	126	279	6982	Potri.001G122400;Potri.001G167100;Potri.001G391900;Potri.002G141700;Potri.004G075900;Potri.012G002500;Potri.015G092000	K00016+K14085+K01595+K00025+K18881+K00873+K01638
Vitamin B6 metabolism	ko00750	2	15	279	6982	Potri.003G034600;Potri.008G196800	K13248+K13248
Histidine metabolism	ko00340	1	28	279	6982	Potri.001G167100	K14085
Sphingolipid metabolism	ko00600	1	40	279	6982	Potri.005G199900	K04713
Cutin, suberine and wax biosynthesis	ko00073	8	39	279	6982	Potri.001G249700;Potri.001G326300;Potri.004G185000;Potri.005G092200;Potri.007G072100;Potri.009G043700;Potri.009G145000;Potri.015G100800	K15401+K15400+K13356+K15402+K15402+K15401+K13356+K15400
Protein export	ko03060	2	75	279	6982	Potri.001G087500;Potri.003G143600	K09490+K09490
Tryptophan metabolism	ko00380	3	52	279	6982	Potri.001G167100;Potri.005G100400;Potri.005G251600	K14085+K03781+K03781
Glycerolipid metabolism	ko00561	5	83	279	6982	Potri.001G167100;Potri.006G063300;Potri.006G097800;Potri.008G058200;Potri.010G201200	K14085+K03715+K13508+K13508+K13508
Purine metabolism	ko00230	7	207	279	6982	Potri.001G443100;Potri.008G159000;Potri.010G081200;Potri.011G153800;Potri.012G002500;Potri.017G063900;Potri.019G031200	K01514+K13811+K13811+K01514+K00873+K10808+K14641
Ether lipid metabolism	ko00565	3	41	279	6982	Potri.006G070400;Potri.006G253900;Potri.013G073600	K01047+K01115+K01114
Glutathione metabolism	ko00480	7	158	279	6982	Potri.001G437400;Potri.005G112200;Potri.010G061400;Potri.013G137200;Potri.017G063900;Potri.019G130600;Potri.T178900	K00799+K00434+K00799+K00799+K10808+K00799+K00799
Lysine degradation	ko00310	2	40	279	6982	Potri.001G167100;Potri.006G272800	K14085+K00306
Phosphatidylinositol signaling system	ko04070	1	86	279	6982	Potri.016G011000	K10047
Arginine and proline metabolism	ko00330	3	79	279	6982	Potri.001G167100;Potri.004G106400;Potri.007G052600	K14085+K00318+K00472
Glycolysis / Gluconeogenesis	ko00010	10	180	279	6982	Potri.001G122400;Potri.001G167100;Potri.002G069000;Potri.002G093300;Potri.004G129700;Potri.006G094400;Potri.010G055400;Potri.011G165000;Potri.012G002500;Potri.017G080000	K00016+K14085+K03841+K01834+K01785+K03841+K00134+K01623+K00873+K01785
alpha-Linolenic acid metabolism	ko00592	3	71	279	6982	Potri.006G070400;Potri.007G021300;Potri.019G092600	K01047+K08241+K00232
Valine, leucine and isoleucine degradation	ko00280	3	74	279	6982	Potri.001G167100;Potri.005G185400;Potri.018G004100	K14085+K00166+K05605
Plant-pathogen interaction	ko04626	13	291	279	6982	Potri.001G098300;Potri.001G288600;Potri.004G089400;Potri.005G035700;Potri.005G245000;Potri.006G137300;Potri.006G271300;Potri.007G127000;Potri.008G159300;Potri.016G128300;Potri.016G142000;Potri.017G029700;Potri.T124900	K13447+K13449+K13448+K13457+K13412+K13447+K05391+K13412+K13448+K13424+K13448+K13448+K13448
Carbon metabolism	ko01200	17	392	279	6982	Potri.001G225700;Potri.001G391900;Potri.002G069000;Potri.002G093300;Potri.002G141700;Potri.004G175800;Potri.005G100400;Potri.005G251600;Potri.006G094400;Potri.007G122900;Potri.010G055400;Potri.011G165000;Potri.012G002500;Potri.015G092000;Potri.017G036900;Potri.018G004100;Potri.T115200	K01807+K01595+K03841+K01834+K00025+K15893+K03781+K03781+K03841+K01637+K00134+K01623+K00873+K01638+K01637+K05605+K01783
Starch and sucrose metabolism	ko00500	26	351	279	6982	Potri.001G015100;Potri.001G222900;Potri.001G225900;Potri.001G226100;Potri.001G416800;Potri.002G126300;Potri.002G200300;Potri.003G001900;Potri.003G112600;Potri.004G118600;Potri.004G162200;Potri.005G059500;Potri.006G175500;Potri.006G256600;Potri.006G256700;Potri.008G094300;Potri.009G118800;Potri.010G247700;Potri.011G135000;Potri.013G013400;Potri.014G125100;Potri.014G127000;Potri.015G127800;Potri.01…	K01188+K01188+K01188+K01188+K20867+K01176+K00770+K01051+K01193+K00012+K01179+K01188+K16055+K01051+K01051+K00012+K00975+K01051+K01051+K01051+K00770+K01051+K01051+K01051+K01179+K01051
Lysine biosynthesis	ko00300	1	21	279	6982	Potri.001G167100	K14085
Fatty acid elongation	ko00062	1	52	279	6982	Potri.008G160000	K15397
Glycosaminoglycan degradation	ko00531	1	20	279	6982	Potri.009G136700	K10532
beta-Alanine metabolism	ko00410	5	73	279	6982	Potri.001G118300;Potri.001G167100;Potri.010G089000;Potri.011G010400;Potri.018G004100	K00276+K14085+K00276+K01578+K05605
Fructose and mannose metabolism	ko00051	3	87	279	6982	Potri.002G069000;Potri.006G094400;Potri.011G165000	K03841+K03841+K01623
Fatty acid metabolism	ko01212	7	105	279	6982	Potri.001G177900;Potri.003G142000;Potri.012G101500;Potri.015G099600;Potri.016G046700;Potri.018G062900;Potri.019G092600	K10781+K09458+K10781+K10781+K00208+K09458+K00232
Circadian rhythm - plant	ko04712	6	59	279	6982	Potri.002G180800;Potri.005G175200;Potri.008G135200;Potri.014G106800;Potri.014G111400;Potri.014G145100	K12133+K00660+K12116+K12133+K12126+K00660
Inositol phosphate metabolism	ko00562	4	86	279	6982	Potri.007G089000;Potri.013G073600;Potri.016G011000;Potri.018G069700	K01858+K01114+K10047+K00469
Biosynthesis of unsaturated fatty acids	ko01040	1	42	279	6982	Potri.019G092600	K00232
Mismatch repair	ko03430	3	73	279	6982	Potri.006G172600;Potri.010G239200;Potri.015G057300	K07466+K10740+K07466
Phenylalanine metabolism	ko00360	5	80	279	6982	Potri.001G118300;Potri.004G102000;Potri.010G089000;Potri.017G014200;Potri.017G112800	K00276+K01904+K00276+K00815+K01904
Taurine and hypotaurine metabolism	ko00430	3	19	279	6982	Potri.004G129400;Potri.019G038900;Potri.T069600	K10712+K10712+K10712
Plant hormone signal transduction	ko04075	17	402	279	6982	Potri.001G027000;Potri.001G069000;Potri.001G092100;Potri.001G166200;Potri.001G177500;Potri.001G288600;Potri.002G127100;Potri.002G186400;Potri.003G161300;Potri.004G165400;Potri.006G278100;Potri.007G067800;Potri.008G166200;Potri.009G037300;Potri.014G111400;Potri.019G103500;Potri.T063000	K14492+K14487+K14497+K13464+K14484+K13449+K14499+K14484+K14487+K14488+K14488+K14488+K14516+K14497+K12126+K14487+K14497
Carbon fixation in photosynthetic organisms	ko00710	8	113	279	6982	Potri.001G225700;Potri.001G391900;Potri.002G069000;Potri.002G141700;Potri.006G094400;Potri.010G055400;Potri.011G165000;Potri.T115200	K01807+K01595+K03841+K00025+K03841+K00134+K01623+K01783
ABC transporters	ko02010	5	43	279	6982	Potri.001G354900;Potri.003G182600;Potri.003G182800;Potri.003G182900;Potri.014G113100	K05658+K05674+K05674+K05674+K05658
Flavonoid biosynthesis	ko00941	7	70	279	6982	Potri.001G113100;Potri.002G033600;Potri.004G017600;Potri.005G028000;Potri.005G028100;Potri.005G175200;Potri.014G145100	K05277+K13082+K13065+K13065+K13065+K00660+K00660
RNA transport	ko03013	2	250	279	6982	Potri.004G168700;Potri.006G103300	K14311+K14293
Steroid biosynthesis	ko00100	1	51	279	6982	Potri.001G070300	K01824
DNA replication	ko03030	9	90	279	6982	Potri.001G070500;Potri.001G074000;Potri.004G131600;Potri.006G172600;Potri.009G121500;Potri.010G239200;Potri.014G121000;Potri.015G057300;Potri.018G112800	K02540+K02542+K02541+K07466+K02212+K10740+K02210+K07466+K02209
Glycine, serine and threonine metabolism	ko00260	7	99	279	6982	Potri.001G118300;Potri.001G144800;Potri.001G167100;Potri.002G093300;Potri.004G175800;Potri.006G272800;Potri.010G089000	K00276+K02437+K14085+K01834+K15893+K00306+K00276
Zeatin biosynthesis	ko00908	5	23	279	6982	Potri.002G030500;Potri.006G047200;Potri.006G048200;Potri.010G030500;Potri.016G044100	K00279+K13495+K13495+K10760+K00279
Protein processing in endoplasmic reticulum	ko04141	10	314	279	6982	Potri.001G087500;Potri.001G430200;Potri.002G082100;Potri.003G071100;Potri.003G143600;Potri.006G223900;Potri.009G021400;Potri.011G120800;Potri.012G022400;Potri.019G055200	K09490+K13719+K09580+K13993+K09490+K13993+K13993+K10666+K13993+K08057
Nucleotide excision repair	ko03420	3	100	279	6982	Potri.006G172600;Potri.010G239200;Potri.015G057300	K07466+K10740+K07466
Pyrimidine metabolism	ko00240	2	168	279	6982	Potri.017G063900;Potri.019G031200	K10808+K14641
Diterpenoid biosynthesis	ko00904	2	34	279	6982	Potri.004G022800;Potri.013G125300	K04125+K17961
Photosynthesis	ko00195	6	147	279	6982	Potri.001G438600;Potri.001G438700;Potri.001G470700;Potri.009G079300;Potri.011G074600;Potri.011G142200	K03541+K03541+K02639+K02709+K02637+K03541
Other glycan degradation	ko00511	1	31	279	6982	Potri.007G056300	K01191
Monobactam biosynthesis	ko00261	2	15	279	6982	Potri.008G159000;Potri.010G081200	K13811+K13811
Glyoxylate and dicarboxylate metabolism	ko00630	8	121	279	6982	Potri.001G144800;Potri.002G141700;Potri.004G175800;Potri.005G100400;Potri.005G251600;Potri.007G122900;Potri.015G092000;Potri.017G036900	K02437+K00025+K15893+K03781+K03781+K01637+K01638+K01637
Glycerophospholipid metabolism	ko00564	8	131	279	6982	Potri.001G325200;Potri.006G070400;Potri.006G097800;Potri.006G253900;Potri.008G058200;Potri.010G201200;Potri.012G047300;Potri.013G073600	K18696+K01047+K13508+K01115+K13508+K13508+K05929+K01114
Selenocompound metabolism	ko00450	4	24	279	6982	Potri.001G084000;Potri.003G190600;Potri.008G159000;Potri.010G081200	K01761+K01761+K13811+K13811
Galactose metabolism	ko00052	11	84	279	6982	Potri.002G193700;Potri.003G112600;Potri.003G123700;Potri.004G129700;Potri.006G065700;Potri.008G189400;Potri.010G042000;Potri.010G150400;Potri.013G005900;Potri.017G080000;Potri.018G126400	K06611+K01193+K01784+K01785+K06617+K18819+K18819+K18819+K18819+K01785+K06617
Base excision repair	ko03410	3	61	279	6982	Potri.008G112300;Potri.010G137300;Potri.014G041700	K01246+K01246+K01246
Isoquinoline alkaloid biosynthesis	ko00950	6	53	279	6982	Potri.001G118300;Potri.001G388900;Potri.004G156500;Potri.010G089000;Potri.017G014200;Potri.T062200	K00276+K00422+K00422+K00276+K00815+K00422
Citrate cycle (TCA cycle)	ko00020	1	83	279	6982	Potri.002G141700	K00025
Pentose and glucuronate interconversions	ko00040	17	160	279	6982	Potri.003G001900;Potri.003G175900;Potri.004G118600;Potri.006G122000;Potri.006G256600;Potri.006G256700;Potri.008G094300;Potri.010G247700;Potri.011G135000;Potri.012G091300;Potri.012G091500;Potri.013G013400;Potri.014G127000;Potri.015G127800;Potri.018G068400;Potri.T115200;Potri.T148200	K01051+K01728+K00012+K01728+K01051+K01051+K00012+K01051+K01051+K01728+K01728+K01051+K01051+K01051+K01051+K01783+K01051
Homologous recombination	ko03440	3	72	279	6982	Potri.006G172600;Potri.010G239200;Potri.015G057300	K07466+K10740+K07466
Photosynthesis - antenna proteins	ko00196	1	27	279	6982	Potri.014G198400	K08909
Nitrogen metabolism	ko00910	3	53	279	6982	Potri.001G348900;Potri.005G156600;Potri.009G010200	K01673+K01673+K01674
Ubiquinone and other terpenoid-quinone biosynthesis	ko00130	4	60	279	6982	Potri.004G102000;Potri.012G070000;Potri.017G014200;Potri.017G112800	K01904+K02552+K00815+K01904
Amino sugar and nucleotide sugar metabolism	ko00520	12	203	279	6982	Potri.001G416800;Potri.002G200300;Potri.003G123700;Potri.004G118600;Potri.008G094300;Potri.009G118800;Potri.012G033900;Potri.014G125100;Potri.015G023900;Potri.019G093800;Potri.019G093900;Potri.019G094000	K20867+K00770+K01784+K00012+K00012+K00975+K01183+K00770+K01183+K01183+K01183+K01183
Sulfur metabolism	ko00920	5	53	279	6982	Potri.004G012100;Potri.008G159000;Potri.010G081200;Potri.014G154200;Potri.T104400	K05907+K13811+K13811+K05907+K05907
Phagosome	ko04145	6	120	279	6982	Potri.001G106100;Potri.001G289500;Potri.002G111900;Potri.014G051800;Potri.017G081000;Potri.019G055200	K07375+K07374+K07374+K04392+K07374+K08057
Arachidonic acid metabolism	ko00590	1	23	279	6982	Potri.006G070400	K01047
Spliceosome	ko03040	2	282	279	6982	Potri.005G024600;Potri.008G085100	K12890+K12824
Ubiquitin mediated proteolysis	ko04120	5	175	279	6982	Potri.001G254500;Potri.002G074700;Potri.009G049600;Potri.013G048900;Potri.019G021800	K06688+K03875+K06688+K03363+K03363
Endocytosis	ko04144	5	242	279	6982	Potri.001G181300;Potri.001G442500;Potri.002G046200;Potri.006G253900;Potri.007G059800	K19476+K12191+K12183+K01115+K19476
Carotenoid biosynthesis	ko00906	8	61	279	6982	Potri.001G242600;Potri.002G126100;Potri.003G218000;Potri.004G074000;Potri.004G140900;Potri.005G138400;Potri.009G033900;Potri.014G029100	K09843+K09843+K02291+K15746+K09843+K09838+K09843+K09843
Peroxisome	ko04146	8	134	279	6982	Potri.001G404600;Potri.004G185000;Potri.005G100400;Potri.005G251600;Potri.006G272800;Potri.009G145000;Potri.011G010400;Potri.019G092600	K13348+K13356+K03781+K03781+K00306+K13356+K01578+K00232
Tropane, piperidine and pyridine alkaloid biosynthesis	ko00960	4	46	279	6982	Potri.001G118300;Potri.006G089800;Potri.010G089000;Potri.017G014200	K00276+K08081+K00276+K00815
Biosynthesis of amino acids	ko01230	10	343	279	6982	Potri.001G167100;Potri.001G225700;Potri.002G093300;Potri.005G162800;Potri.010G055400;Potri.010G153500;Potri.011G165000;Potri.012G002500;Potri.017G014200;Potri.T115200	K14085+K01807+K01834+K01626+K00134+K00789+K01623+K00873+K00815+K01783
Fatty acid biosynthesis	ko00061	6	65	279	6982	Potri.001G177900;Potri.003G142000;Potri.012G101500;Potri.015G099600;Potri.016G046700;Potri.018G062900	K10781+K09458+K10781+K10781+K00208+K09458
Riboflavin metabolism	ko00740	2	16	279	6982	Potri.001G234900;Potri.017G050400	K14652+K14652
Sesquiterpenoid and triterpenoid biosynthesis	ko00909	1	29	279	6982	Potri.007G002100	K15813
SNARE interactions in vesicular transport	ko04130	2	56	279	6982	Potri.002G200400;Potri.013G053200	K08489+K08486

## Sheet: 0 h vs_72 h.KEGG_enrichm
#KEGG_n	164	KEGG_N	6982
#Pathway	ko_ID	DEgene	gene	DEgene_all	gene_all
Isoquinoline alkaloid biosynthesis	ko00950	4	53	164	6982	Potri.004G156500;Potri.010G089000;Potri.011G047300;Potri.017G014200	K00422+K00276+K00422+K00815
Carbon fixation in photosynthetic organisms	ko00710	4	113	164	6982	Potri.002G069000;Potri.004G054200;Potri.008G179300;Potri.010G055400	K03841+K00026+K00134+K00134
beta-Alanine metabolism	ko00410	3	73	164	6982	Potri.004G075200;Potri.008G141100;Potri.010G089000	K01580+K01580+K00276
Fatty acid metabolism	ko01212	1	105	164	6982	Potri.001G012500	K10256
Fructose and mannose metabolism	ko00051	1	87	164	6982	Potri.002G069000	K03841
Phenylpropanoid biosynthesis	ko00940	29	286	164	6982	Potri.001G222900;Potri.001G225900;Potri.001G226100;Potri.001G227300;Potri.001G227400;Potri.004G052100;Potri.005G028000;Potri.005G028100;Potri.005G059500;Potri.005G118700;Potri.005G135300;Potri.006G129900;Potri.006G267400;Potri.008G033500;Potri.008G034300;Potri.009G062800;Potri.009G063100;Potri.009G063300;Potri.013G154400;Potri.014G106600;Potri.015G003600;Potri.016G125000;Potri.016G132700;Potri.01…	K01188+K01188+K01188+K01188+K01188+K00430+K13065+K13065+K01188+K00430+K00430+K00430+K00430+K13065+K13065+K00083+K00083+K00083+K00430+K13066+K00430+K00430+K00430+K00430+K13065+K00487+K13065+K13065+K01188
Lysine degradation	ko00310	1	40	164	6982	Potri.006G272800	K00306
AGE-RAGE signaling pathway in diabetic complications	ko04933	1	20	164	6982	Potri.014G051800	K04392
Phosphatidylinositol signaling system	ko04070	1	86	164	6982	Potri.004G122900	K02183
Citrate cycle (TCA cycle)	ko00020	1	83	164	6982	Potri.004G054200	K00026
Taurine and hypotaurine metabolism	ko00430	2	19	164	6982	Potri.004G075200;Potri.008G141100	K01580+K01580
2-Oxocarboxylic acid metabolism	ko01210	1	79	164	6982	Potri.008G172500	K01703
Amino sugar and nucleotide sugar metabolism	ko00520	10	203	164	6982	Potri.001G416800;Potri.004G182000;Potri.007G146100;Potri.010G246800;Potri.012G033900;Potri.013G125000;Potri.014G092800;Potri.014G110000;Potri.014G125100;Potri.015G024200	K20867+K20547+K00975+K00326+K01183+K01183+K01183+K00975+K00770+K01183
Endocytosis	ko04144	3	242	164	6982	Potri.006G253900;Potri.007G059800;Potri.009G133500	K01115+K19476+K19366
Photosynthesis	ko00195	3	147	164	6982	Potri.001G438600;Potri.001G438700;Potri.011G142200	K03541+K03541+K03541
Spliceosome	ko03040	1	282	164	6982	Potri.008G085100	K12824
Peroxisome	ko04146	3	134	164	6982	Potri.004G185000;Potri.006G272800;Potri.009G145000	K13356+K00306+K13356
Galactose metabolism	ko00052	8	84	164	6982	Potri.004G129700;Potri.008G189400;Potri.010G042000;Potri.010G150400;Potri.011G166700;Potri.013G005800;Potri.013G005900;Potri.018G126400	K01785+K18819+K18819+K18819+K06617+K18819+K18819+K06617
Starch and sucrose metabolism	ko00500	24	351	164	6982	Potri.001G162500;Potri.001G162600;Potri.001G222900;Potri.001G225900;Potri.001G226100;Potri.001G227300;Potri.001G227400;Potri.001G416800;Potri.004G162200;Potri.005G059500;Potri.006G256600;Potri.006G256700;Potri.007G144400;Potri.007G146100;Potri.010G247700;Potri.011G135000;Potri.014G110000;Potri.014G125100;Potri.014G127000;Potri.015G029100;Potri.017G057800;Potri.019G069300;Potri.T148200;Potri.T1778…	K01051+K01051+K01188+K01188+K01188+K01188+K01188+K20867+K01179+K01188+K01051+K01051+K01184+K00975+K01051+K01051+K00975+K00770+K01051+K00695+K00696+K01179+K01051+K01188
Selenocompound metabolism	ko00450	1	24	164	6982	Potri.003G187000	K01761
Flavonoid biosynthesis	ko00941	10	70	164	6982	Potri.004G139700;Potri.005G028000;Potri.005G028100;Potri.005G175200;Potri.008G033500;Potri.008G034300;Potri.018G105500;Potri.018G146100;Potri.019G001200;Potri.019G001400	K05278+K13065+K13065+K00660+K13065+K13065+K13065+K00487+K13065+K13065
Vitamin B6 metabolism	ko00750	2	15	164	6982	Potri.003G034600;Potri.008G196800	K13248+K13248
Phagosome	ko04145	1	120	164	6982	Potri.014G051800	K04392
Cutin, suberine and wax biosynthesis	ko00073	2	39	164	6982	Potri.004G185000;Potri.009G145000	K13356+K13356
Biosynthesis of unsaturated fatty acids	ko01040	1	42	164	6982	Potri.001G012500	K10256
Arginine and proline metabolism	ko00330	1	79	164	6982	Potri.007G052600	K00472
Plant-pathogen interaction	ko04626	13	291	164	6982	Potri.004G089400;Potri.004G122900;Potri.005G035700;Potri.005G259900;Potri.006G105300;Potri.006G112500;Potri.007G127000;Potri.008G159300;Potri.009G066100;Potri.013G153400;Potri.015G093800;Potri.016G128300;Potri.T131500	K13448+K02183+K13457+K13448+K13424+K13448+K13412+K13448+K20536+K13424+K13448+K13424+K13449
Purine metabolism	ko00230	2	207	164	6982	Potri.001G443100;Potri.019G031200	K01514+K14641
Carbon metabolism	ko01200	4	392	164	6982	Potri.002G069000;Potri.004G054200;Potri.008G179300;Potri.010G055400	K03841+K00026+K00134+K00134
Cysteine and methionine metabolism	ko00270	6	150	164	6982	Potri.001G099400;Potri.003G187000;Potri.004G054200;Potri.005G182700;Potri.006G151600;Potri.017G014200	K20772+K01761+K00026+K05933+K05933+K00815
Glyoxylate and dicarboxylate metabolism	ko00630	2	121	164	6982	Potri.001G144800;Potri.004G054200	K02437+K00026
Circadian rhythm - plant	ko04712	2	59	164	6982	Potri.005G175200;Potri.014G111400	K00660+K12126
Phenylalanine, tyrosine and tryptophan biosynthesis	ko00400	2	77	164	6982	Potri.017G014200;Potri.018G019300	K00815+K01850
Plant hormone signal transduction	ko04075	26	402	164	6982	Potri.001G027000;Potri.001G069000;Potri.001G092100;Potri.001G166200;Potri.002G127100;Potri.002G186400;Potri.003G068900;Potri.003G167400;Potri.004G165400;Potri.004G165800;Potri.005G223200;Potri.005G237000;Potri.007G050300;Potri.007G067800;Potri.008G164400;Potri.009G092900;Potri.009G126000;Potri.010G072300;Potri.010G074300;Potri.010G234700;Potri.013G045200;Potri.014G111400;Potri.018G132400;Potri.01…	K14492+K14487+K14497+K13464+K14499+K14484+K13464+K14488+K14488+K14488+K14516+K14488+K14487+K14488+K14509+K14487+K14488+K14516+K14509+K14510+K14516+K12126+K14488+K14487+K13449+K14497
Pentose and glucuronate interconversions	ko00040	11	160	164	6982	Potri.001G162500;Potri.001G162600;Potri.001G339500;Potri.006G256600;Potri.006G256700;Potri.007G144400;Potri.010G247700;Potri.011G135000;Potri.014G127000;Potri.014G178100;Potri.T148200	K01051+K01051+K01728+K01051+K01051+K01184+K01051+K01051+K01051+K01728+K01051
Ubiquitin mediated proteolysis	ko04120	1	175	164	6982	Potri.001G254500	K06688
Carotenoid biosynthesis	ko00906	4	61	164	6982	Potri.001G242600;Potri.002G126100;Potri.003G218000;Potri.009G033900	K09843+K09843+K02291+K09843
Pyrimidine metabolism	ko00240	1	168	164	6982	Potri.019G031200	K14641
Tryptophan metabolism	ko00380	1	52	164	6982	Potri.002G254200	K11816
N-Glycan biosynthesis	ko00510	2	65	164	6982	Potri.008G186000;Potri.010G046900	K00737+K00737
Ubiquinone and other terpenoid-quinone biosynthesis	ko00130	2	60	164	6982	Potri.017G014200;Potri.018G146100	K00815+K00487
Glycine, serine and threonine metabolism	ko00260	3	99	164	6982	Potri.001G144800;Potri.006G272800;Potri.010G089000	K02437+K00306+K00276
Tyrosine metabolism	ko00350	4	88	164	6982	Potri.004G156500;Potri.010G089000;Potri.011G047300;Potri.017G014200	K00422+K00276+K00422+K00815
SNARE interactions in vesicular transport	ko04130	1	56	164	6982	Potri.013G053200	K08486
Nitrogen metabolism	ko00910	3	53	164	6982	Potri.001G348900;Potri.005G172400;Potri.009G010200	K01673+K10534+K01674
Base excision repair	ko03410	3	61	164	6982	Potri.008G112300;Potri.010G137300;Potri.014G041700	K01246+K01246+K01246
Glycolysis / Gluconeogenesis	ko00010	4	180	164	6982	Potri.002G069000;Potri.004G129700;Potri.008G179300;Potri.010G055400	K03841+K01785+K00134+K00134
Fatty acid elongation	ko00062	2	52	164	6982	Potri.001G211400;Potri.008G120300	K15397+K15397
Pentose phosphate pathway	ko00030	1	87	164	6982	Potri.002G069000	K03841
Cyanoamino acid metabolism	ko00460	7	81	164	6982	Potri.001G222900;Potri.001G225900;Potri.001G226100;Potri.001G227300;Potri.001G227400;Potri.005G059500;Potri.T177800	K01188+K01188+K01188+K01188+K01188+K01188+K01188
Terpenoid backbone biosynthesis	ko00900	1	87	164	6982	Potri.004G208500	K00021
Glutathione metabolism	ko00480	3	158	164	6982	Potri.006G024200;Potri.008G174900;Potri.011G114000	K00799+K00799+K00799
Ether lipid metabolism	ko00565	1	41	164	6982	Potri.006G253900	K01115
Butanoate metabolism	ko00650	2	31	164	6982	Potri.004G075200;Potri.008G141100	K01580+K01580
Linoleic acid metabolism	ko00591	1	25	164	6982	Potri.005G032700	K15718
Alanine, aspartate and glutamate metabolism	ko00250	2	71	164	6982	Potri.004G075200;Potri.008G141100	K01580+K01580
Sphingolipid metabolism	ko00600	1	40	164	6982	Potri.005G199900	K04713
Phenylalanine metabolism	ko00360	3	80	164	6982	Potri.010G089000;Potri.017G014200;Potri.018G146100	K00276+K00815+K00487
Stilbenoid, diarylheptanoid and gingerol biosynthesis	ko00945	8	38	164	6982	Potri.005G028000;Potri.005G028100;Potri.008G033500;Potri.008G034300;Potri.018G105500;Potri.018G146100;Potri.019G001200;Potri.019G001400	K13065+K13065+K13065+K13065+K13065+K00487+K13065+K13065
C5-Branched dibasic acid metabolism	ko00660	1	9	164	6982	Potri.008G172500	K01703
Photosynthesis - antenna proteins	ko00196	1	27	164	6982	Potri.008G041000	K08907
Tropane, piperidine and pyridine alkaloid biosynthesis	ko00960	3	46	164	6982	Potri.006G089800;Potri.010G089000;Potri.017G014200	K08081+K00276+K00815
Biosynthesis of amino acids	ko01230	5	343	164	6982	Potri.008G172500;Potri.008G179300;Potri.010G055400;Potri.017G014200;Potri.018G019300	K01703+K00134+K00134+K00815+K01850
Pyruvate metabolism	ko00620	1	126	164	6982	Potri.004G054200	K00026
Zeatin biosynthesis	ko00908	1	23	164	6982	Potri.002G030500	K00279
Brassinosteroid biosynthesis	ko00905	1	27	164	6982	Potri.017G099000	K12640
alpha-Linolenic acid metabolism	ko00592	1	71	164	6982	Potri.007G021300	K08241
Glycerophospholipid metabolism	ko00564	1	131	164	6982	Potri.006G253900	K01115
Valine, leucine and isoleucine biosynthesis	ko00290	1	23	164	6982	Potri.008G172500	K01703
